# Supplementary material
Source: HighWire-hosted journal article supplement (https://www.annfammed.org/highwire/filestream/8353/field_highwire_adjunct_files/0/Johnson_Supp_App_A.pdf)
Supplement: Johnson_Supp_App_A.pdf [file Johnson_Supp_App_A.pdf]

**Online Supplementary Material**

Lau D, Hu J, Majumdar SR, Storie DA, Rees SE, Johnson JA. Interventions to improve influenza and pneumococcal vaccination rates among community-dwelling adults: A systematic review and meta-analysis. *Ann Fam Med*. 2012;10(6):538-546.

<http://www.annfammed.org/content/10/6/538/suppl/DC1>

**Supplemental Appendix A.** This appendix contains detailed methods (including the search strategy), and information on excluded and included studies. Exhibit A.1 summarizes recommendations for influenza and pneumococcal vaccination. The search strategy is reported in Exhibit A.2. Exhibits A.3 and A.4 are tables listing excluded studies and reasons for exclusion. Exhibit A.5 contains detailed descriptions of the design, interventions, and results of the included studies.

This appendix contains the detailed methods (including the search strategy), and information on excluded and included studies. Exhibit A.1 summarizes recommendations for influenza and pneumococcal vaccination. The search strategy is reported in Exhibit A.2. Exhibits A.3 and A.4 are tables listing excluded studies and reasons for exclusion. Exhibit A.5 contains detailed descriptions of design, interventions, results, and Downs and Black quality scores for 106 included studies, comprising 151 intervention-control comparisons. One-hundred and eleven comparisons from 77 studies entered meta-analysis. Studies that did not enter meta-analysis met inclusion criteria, but may not have reported vaccination outcomes in a manner conducive to meta-analysis. For example, some studies converted vaccination rates to continuous performance scores for each physician. Two studies were excluded from analyses as outliers (1)(2). Removal of these studies led to dramatic decreases in heterogeneity within the team change (nurses with responsibilities for administering vaccine) strata. Exhibit A.6 lists each included study and the meta-analyses to which they contributed.

**Contents**

| Exhibit                                                                            | Page |
|------------------------------------------------------------------------------------|------|
| A.1: Recommendations of the US Advisory Committee on Immunization Practices (ACIP) | 2    |
| A.2(a): Detailed methods and search strategy                                       | 3    |
| A.2(b): Quality assessment tool – Downs and Black instrument (reproduced)          | 8    |
| A.3: Excluded studies                                                              | 10   |
| A.4: Reasons for exclusion                                                         | 18   |
| A.5: Included studies                                                              | 19   |
| A.6: Studies included in meta-analysis                                             | 104  |
| References                                                                         | 111  |

## Exhibit A.1. Recommendations of the US Advisory Committee on Immunization Practices (ACIP)

## 2010 Influenza vaccination recommendations (adults)

- All persons aged  $\geq 6$  months

ACIP, 2010

## 2009 Influenza vaccination recommendations (adults)

*These recommendations have been succeeded by a policy of universal vaccination. However, ACIP considers the following groups "high risk", and therefore deserving of particular emphasis during periods of limited vaccine supply, or in the transition from targeted to universal vaccination.*

- All persons aged  $\geq 50$  years
- Women who will be pregnant during the influenza season
- Persons who have chronic pulmonary, cardiovascular, renal, hepatic, neurological/neuromuscular, hematologic, or metabolic disorders (including diabetes mellitus)
- Adults who have immunosuppression
- Residents of nursing homes and other long-term care facilities.

ACIP, 2009

## Pneumococcal vaccination recommendations (adults)

- All persons aged  $\geq 65$  years
- Persons with chronic cardiovascular disease, chronic pulmonary disease (including asthma), or diabetes mellitus
- Persons with alcoholism, chronic liver disease, or cerebrospinal fluid leaks
- Persons with cochlear implants
- Persons with functional or anatomic asplenia
- Persons living in special environments or social settings
- Immunocompromised persons
- Smokers

## Revaccination

- A second dose is recommended 5 years after the first dose for persons with functional or anatomic asplenia and for immunocompromised persons.
- Those who received vaccination before age 65 years should receive another dose of vaccine at age 65 years or later if  $\geq 5$  years have passed since their previous dose.

ACIP updated recommendations  
(Reported by Nuorti and Whitney, 2010)

Exhibit A.2(a). Detailed methods and search summary

### Data sources and searches

A health sciences librarian (DAS) searched medical literature databases (Medline, EMBASE, Cochrane Library, Scopus, Web of Science, AARP Ageline, PsychInfo, Social Policy and Practice, and CINAHL) from inception to August 2010 for potentially relevant citations (Supplement A.2). We complemented the electronic search with references from previous reviews and included studies.

### Study selection

The title and abstract of each citation retrieved was screened for relevance. Full papers of relevant citations were examined for inclusion. English language studies published in peer-reviewed journals were included if they involved elderly adults or adults with chronic diseases; involved a quality improvement intervention (see below); featured a parallel control group; and reported influenza or pneumococcal vaccination rates. We focused exclusively on the community setting to maximize relevance for primary care. Studies taking place in acute or long-term care were excluded. Studies reporting sufficient data to estimate log odds ratios (OR) and standard errors were eligible for meta-analysis. Two reviewers (DL and JH) selected studies independently.

### Data extraction and quality assessment

Data concerning study design, setting, patient characteristics, intervention characteristics, study quality, patient numbers, and odds ratios (OR) were extracted from included studies. Study quality was measured using the Downs and Black instrument. Data was extracted using standard forms, in duplicate by two reviewers (DL and JH), with disagreements resolved by consensus.

### Search strategy

#### MEDLINE

OVID (1950-present, including in-process citations)

August 13, 2010

1888 results total

1. exp Immunization/
2. (immuniz\* or immunis\*).ti,ab.
3. exp Immunization Programs/
4. vaccin\*.ti,ab.
5. inoculat\*.ti,ab.
6. Influenza Vaccines/ad [Administration & Dosage]
7. Pneumococcal Vaccines/ad [Administration & Dosage]
8. or/1-7
9. Influenza, Human/
10. pneumococcal infections/ or pneumonia, pneumococcal/
11. (influenza or pneumococcal or pneumonia).ti,ab.
12. or/9-11
13. 8 and 12
14. preventive health services/ or exp immunization programs/
15. (program\* or intervention\*).mp.
16. ((vaccinat\* or immunis\* or immuniz\* or inoculat\*) adj3 (rate or rates or uptake or delivery or distribution or coverage or status)).ti,ab.
17. quality assurance, health care/ or benchmarking/ or clinical audit/ or medical audit/ or nursing audit/ or total quality management/
18. (quality improvement or QI).mp.
19. patient care planning/ or case management/
20. Patient Care Team/
21. interdisciplinary communication/
22. Registries/
23. education, medical, continuing/ or education, nursing, continuing/ or education, pharmacy, continuing/
24. Reminder Systems/
25. Patient Education as Topic/
26. Self Care/
27. Medical Records Systems, Computerized/
28. (case management or patient registry or reminder\* or patient education or self care or self management).ti,ab.
29. or/14-28
30. 13 and 29
31. limit 30 to (english language)
32. animals/
33. humans/
34. 32 not (32 and 33)
35. 31 not 34
36. randomized controlled trial.pt. or random\*.tw. or control\*.tw. or intervention\*.tw. or evaluat\*.tw. or compar\*.tw. or impact.tw. or evaluat\*.tw.
37. (time adj series).tw. or (pretest or pre test or posttest or post test).mp. or (before adj2 after).tw.

38. 36 or 37
39. 38 and 35
40. limit 39 to "all child (0 to 18 years)"
41. limit 39 to "all adult (19 plus years)"
42. 40 not (40 and 41)
43. 39 not 42

**EMBASE**

OVID (1980-Week 31, 2010)  
 August 13, 2010  
 2619 results total

1. immunization/ or mass immunization/ or vaccination/
2. (immuniz\* or immunis\*).ti,ab.
3. (vaccin\* or inoculat\*).ti,ab.
4. influenza/
5. Streptococcus pneumonia/
6. pneumococcal infection/
7. pneumonia/
8. Streptococcus infection/
9. (influenza or pneumocc\* or pneumonia).ti,ab.
10. or/1-4
11. or/5-9
12. influenza vaccination/
13. 11 and 10
14. 13 or 12
15. vann jc.au.
16. ndiaye sm.au.
17. 16 or 15
18. preventive health service/
19. health program/
20. intervention.tw.
21. ((vaccinat\* or immunis\* or immuniz\* or inoculat\*) adj3 (rate or rates or uptake or delivery or distribution or coverage or status)).ti,ab.
22. quality control/ or medical audit/ or total quality management/
23. (quality improvement or QI).ti,ab.
24. patient care/ or case management/ or patient care planning/ or patient decision making/ or patient scheduling/
25. interdisciplinary communication/
26. exp information system/
27. continuing education/
28. patient education/
29. self care/
30. (case management or patient registry or reminder\* or patient education or self care or self management).ti,ab.
31. or/18-30
32. 31 and 14
33. limit 32 to (english language)
34. (exp vertebrate/ or animal/ or exp experimental animal/ or nonhuman/ or animal.hw.) not exp human/
35. 33 not 34
36. randomized controlled trial/
37. controlled study/
38. (random\* or experiment\* or (time adj series) or (pre test or pretest or posttest or post test) or (before adj3 after)).tw.
39. (impact\* or intervention\* or effect\* or chang\* or evaluat\* or compar\* or control\*).tw.
40. or/36-39
41. 35 and 40
42. limit 41 to (embryo or infant or child or preschool child <1 to 6 years> or school child <7 to 12 years> or adolescent <13 to 17 years>)
43. limit 41 to (adult <18 to 64 years> or aged <65+ years>)
44. 42 not (42 and 43)
45. 41 not 44

**Cochrane Library**

Wiley (to issue 3, 2010)  
 August 13, 2010  
 838 results

Cochrane SRs: 28  
 DARE: 6  
 CENTRAL: 722  
 Methods: 8  
 HTA: 2

Economic Evals: 72

#1 ([immuniz\\* or immunis\\* or inoculat\\* or vaccin\\*](#)):ti,ab,kw and ([influenza or pneumococc\\* or streptococc\\* or pneumonia](#)):ti,ab,kw

#2 ([rate or rates or uptake or delivery or distribution or coverage or status](#)):ti,ab,kw or ["quality improvement" or qi or "quality management" or "case management" or "patient care" or interdisciplinary](#):ti,ab,kw or ([registr\\* or audit or education or reminder\\* or "self care" or "self management" or "medical record" or program\\* or intervention\\*](#)):ti,ab,kw

#3 (#1 and #2)

#### CINAHL

Ebsco

August 30, 2010

121 results

S8 ((S1 OR S2) AND (S3 OR S4 OR S5 OR S6)) OR S7

Limiters - Exclude MEDLINE records; Publication Type: Clinical Trial, Conference, Doctoral Dissertation, Masters Thesis, Nursing Interventions, Practice Guidelines, Proceedings, Protocol, Research

Search modes - Boolean/Phrase Interface

S7 (MH "Influenza Vaccine/AD/SD")

S6 TI ( ([influenza or pneumococc\\* or streptococc\\* or pneumonia](#)) ) and AB ( ([influenza or pneumococc\\* or streptococc\\* or pneumonia](#)) )

S5 (MH "Pneumonia")

S4 (MH "Pneumococcal Infections")

S3 (MH "Influenza")

S2 TI ( ([vaccin\\* or immunis\\* or immuniz\\* or inoculat\\*](#)) ) or AB ( ([vaccin\\* or immunis\\* or immuniz\\* or inoculat\\*](#)) )

S1 (MH "Immunization")

#### Scopus

Elsevier

August 13, 2010

1216 results

((TITTLE-ABS-KEY(([pneumococcal W/3 immuniz\\*](#)) OR ([pneumococcal W/3 immunis\\*](#)) OR ([pneumococcal W/3 vaccinat\\*](#)) OR ([pneumonia W/3 immuniz\\*](#)) OR ([pneumonia W/3 immunis\\*](#)) OR ([pneumonia W/3 vaccinat\\*](#)) OR ([pneumonia W/3 inoculat\\*](#))) OR TITTLE-ABS-KEY(([influenza W/3 immuniz\\*](#)) OR ([influenza W/3 immunis\\*](#)) OR ([influenza W/3 vaccinat\\*](#)) OR ([influenza W/3 inoculat\\*](#)))) AND (TITTLE-ABS-KEY(([program\\*](#) OR [intervention\\*](#) OR ["quality improvement"](#) OR ["quality management"](#) OR [audit](#) OR [case management](#) OR ["patient care"](#) OR [registry](#) OR [registries](#) OR ["patient education"](#) OR ["self care"](#) OR ["self management"](#) OR [reminder\\*](#) OR [medical record\\*](#))) AND SUBJAREA(mult OR medi OR nurs OR vete OR dent OR heal OR mult OR arts OR busi OR deci OR econ OR psyc OR soci)))

OR

((TITTLE-ABS-KEY(([vaccinat\\* W/2 rate\\*](#)) OR ([immuniz\\* W/2 rate\\*](#)) OR ([immunis\\* W/2 rate\\*](#)) OR ([inoculat\\* W/2 rate\\*](#))) AND TITTLE-ABS-KEY([pneumoccc\\*](#) OR [pneumonia](#) OR [influenza](#))) AND SUBJAREA(mult OR medi OR nurs OR vete OR dent OR heal OR mult OR arts OR busi OR deci OR econ OR psyc OR soci))

AND (EXCLUDE(SUBJAREA, "VETE") OR EXCLUDE(SUBJAREA, "BIOC") OR EXCLUDE(SUBJAREA, "CENG") OR EXCLUDE(SUBJAREA, "ENVI") OR EXCLUDE(SUBJAREA, "BUSI") OR EXCLUDE(SUBJAREA, "ECON") OR EXCLUDE(SUBJAREA, "AGRI") OR EXCLUDE(SUBJAREA, "ENGI") OR EXCLUDE(SUBJAREA, "EART") OR EXCLUDE(SUBJAREA, "COMP") OR EXCLUDE(SUBJAREA, "MATH") OR EXCLUDE(SUBJAREA, "NEUR")) AND (EXCLUDE(DOCTYPE, "no") OR EXCLUDE(DOCTYPE, "le") OR EXCLUDE(DOCTYPE, "ed"))

#### Web of Science

ISI – Sciences & Social Sciences Index

August 13, 2010

997 results

Topic=(([vaccination SAME influenza](#)) OR ([vaccination SAME pneumococc\\*](#)) OR ([vaccination SAME pneumonia](#)) OR ([immuni?ation SAME influenza](#)) OR ([immuni?ation SAME pneumococc\\*](#)) OR ([immuni?ation SAME pneumonia](#)))

AND

Topic=((vaccination SAME rate\*) or (immuni?ation SAME rate\*) or (vaccination SAME status) or (immuni?ation SAME status) OR (vaccination SAME coverage) OR (immuni?ation SAME coverage) OR (vaccination SAME uptake) OR (immuni?ation SAME uptake))

AND

Topic=(random\* or control\* or intervention\* or program\* or evaluat\* or effect\* or compar\* or impact or "time series" or (before SAME after) or chang\*)

Refined by: Subject Areas=( PUBLIC, ENVIRONMENTAL & OCCUPATIONAL HEALTH OR MEDICINE, GENERAL & INTERNAL OR IMMUNOLOGY OR INFECTIOUS DISEASES OR MEDICINE, RESEARCH & EXPERIMENTAL OR EDUCATION & EDUCATIONAL RESEARCH OR GERIATRICS & GERONTOLOGY OR HEALTH CARE SCIENCES & SERVICES OR HEALTH POLICY & SERVICES OR PERIPHERAL VASCULAR DISEASE OR PHARMACOLOGY & PHARMACY OR GERONTOLOGY OR RESPIRATORY SYSTEM OR VIROLOGY OR NURSING OR PSYCHOLOGY, APPLIED OR PSYCHOLOGY, MULTIDISCIPLINARY OR PSYCHOLOGY, CLINICAL OR SOCIAL SCIENCES, INTERDISCIPLINARY OR SOCIAL SCIENCES, BIOMEDICAL OR CARDIAC & CARDIOVASCULAR SYSTEMS OR ONCOLOGY OR ENDOCRINOLOGY & METABOLISM )  
Timespan=1995-2009. Databases=SCI-EXPANDED, SSCI.

**PsycINFO**

Ovid 1987-present  
August 13 2010  
261 results

1. immunization/
2. (vaccin\* or immuniz\* or immunis\* or inoculat\*).ti,ab.
3. 2 or 1
4. influenza/
5. pneumonia/
6. (influenza or pneumococc\* or pneumonia).ti,ab.
7. or/4-6
8. 3 and 7
9. limit 8 to (peer reviewed journal and human)
10. limit 9 to ("0200 clinical case study" or "0400 empirical study" or "0410 experimental replication" or "0430 followup study" or "0450 longitudinal study" or "0600 field study" or "0800 literature review" or "0830 systematic review" or 1200 meta analysis or 1800 quantitative study or "2000 treatment outcome/randomized clinical trial")
11. limit 10 to "300 adulthood "

**AARP Ageline**

Ovid  
August 13, 2010  
223 results

1. (vaccin\* or immuniz\* or immunis\* or inoculat\*).mp. [mp=abstract, title, publication type, heading word, accession number]
2. (influenza or pneumonia or pneumococc\* or streptocc\*).mp. [mp=abstract, title, publication type, heading word, accession number]
3. 1 and 2
4. 3 not (child\* or infant\*).mp. [mp=abstract, title, publication type, heading word, accession number]

**Social Policy and Practice**

Ovid  
August 13, 2010  
75 results

Same search as Ageline

Exhibit A.2(b). Downs and Black quality assessment instrument for randomized and non-randomized studies

**Downs and Black (1998) Quality Assessment Criteria**

See Downs and Black (1998) for details. Code 1 for yes, 0 for no, and 0 for unable to determine except in questions 5 and 27.

| <b>Reporting</b>                                                                                                                                                                                                              | <b>Score</b> |
|-------------------------------------------------------------------------------------------------------------------------------------------------------------------------------------------------------------------------------|--------------|
| 1. Is the hypothesis/aim/objective of the study clearly defined?                                                                                                                                                              | /1           |
| 2. Are the main outcomes to be measured clearly described in the introduction or methods section?                                                                                                                             | /1           |
| 3. Are the characteristics of the patients included in the study clearly described?                                                                                                                                           | /1           |
| 4. Are the interventions of interest clearly described?                                                                                                                                                                       | /1           |
| 5. Are the distributions of principal confounders in each group of subjects to be compared clearly described?                                                                                                                 | /2           |
| 6. Are the main findings of the study clearly described?                                                                                                                                                                      | /1           |
| 7. Does the study provide estimates of the random variability in the data for the main outcomes?                                                                                                                              | /1           |
| 8. Have all important adverse events that may be a consequence of the intervention been reported?                                                                                                                             | /1           |
| 9. Have the characteristics of patients lost to follow-up been described?                                                                                                                                                     | /1           |
| 10. Have actual probability values been reported for the main outcomes, except where $p < 0.001$ ?                                                                                                                            | /1           |
| <b>External validity</b>                                                                                                                                                                                                      | <b>Score</b> |
| 11. Were the subjects asked to participate in the study representative of the entire population from which they were recruited?                                                                                               | /1           |
| 12. Were those subjects who were prepared to participate representative of the entire population from which they were recruited?                                                                                              | /1           |
| 13. Were the staff, places, and facilities where the patients were treated, representative of the treatment the majority of patients receive?                                                                                 | /1           |
| <b>Internal validity - bias</b>                                                                                                                                                                                               | <b>Score</b> |
| 14. Was an attempt made to blind study subjects to the intervention they have received?                                                                                                                                       | /1           |
| 15. Was an attempt made to blind those measuring the main outcomes of the intervention?                                                                                                                                       | /1           |
| 16. If any of the results of the study were based on "data dredging", was this made clear?                                                                                                                                    | /1           |
| 17. In trials and cohort studies, do the analyses adjust for different lengths of follow-up of patients, or in case control studies, is the time period between the intervention and outcome the same for cases and controls? | /1           |
| 18. Were the statistical tests used to assess the main outcomes appropriate?                                                                                                                                                  | /1           |
| 19. Was compliance with the intervention/s reliable?                                                                                                                                                                          | /1           |
| 20. Were the main outcome measures used accurate (valid and reliable)?                                                                                                                                                        | /1           |
| <b>Internal validity - confounding</b>                                                                                                                                                                                        | <b>Score</b> |
| 21. Were the patients in different intervention groups or were the cases and controls recruited from the same population?                                                                                                     | /1           |
| 22. Were study subjects in different intervention groups or were the cases and controls recruited over the same period of time?                                                                                               | /1           |
| 23. Were study subjects randomized to intervention groups?                                                                                                                                                                    | /1           |
| 24. Was the randomized intervention assignment concealed from both patients and health care staff until recruitment was complete and irrevocable?                                                                             | /1           |
| 25. Was there adequate adjustment for confounding in the analyses from which the main findings were drawn?                                                                                                                    | /1           |
| 26. Were losses of patients to follow-up taken into account?                                                                                                                                                                  | /1           |
| <b>Power</b>                                                                                                                                                                                                                  | <b>Score</b> |
| 27. Did the study have sufficient power to detect a clinically important effect where the probability value for a difference being due to chance is less than 5%?                                                             | /5           |

Notes:

Question 5: Potential confounders were patient age, gender, chronic disease status, characteristics of chronic diseases (e.g.: duration of diabetes, if relevant), and other predictors of vaccination (e.g.: education, marital

status). For observational studies, if the distribution at baseline of some confounders was provided, then a score of “1” was assigned. A score of “2” was assigned if the distribution of age, gender, and at least one other predictor of vaccination status was reported for both treatment and control groups. Question 5 concerns reporting. The adequacy of the confounder balance achieved is judged in question 25.

Question 25: Randomized studies received a score of “1” if the distribution of potential confounders was reported and found to be balanced, “0” if the distribution of potential confounders was reported and found to be unbalanced, and “9”, for “unclear”, if the distribution of potential confounders was not reported at baseline (see question 5). For summative purposes, code “9” was treated as a score of “0”. Observational studies received a score of “1” if the distribution of potential confounders was reported and found to be balanced, and “0” otherwise.

Question 27: The interpretation of question 27 in Downs and Black (1998) is unclear. We assigned a score of “0” if no power calculation was provided, “3” if a power calculation was provided but the importance or impact of the difference between groups used in the calculation was unclear, and “5” if the difference between groups was clearly defined as a clinically important difference.

Reference:

Downs SH, Black N. The feasibility of creating a checklist for the assessment of the methodological quality both of randomised and non-randomised studies of health care interventions. *Journal of Epidemiology and Community Health*, 52(6): 1998. Pp. 377-84.



Exhibit A.3. Excluded studies

| First author   | Year | Reference | Reasons for exclusion |              |            |                    |                               |        |                  |             |       | Reasons for assigning "other" |
|----------------|------|-----------|-----------------------|--------------|------------|--------------------|-------------------------------|--------|------------------|-------------|-------|-------------------------------|
|                |      |           | Setting               | Uncontrolled | Not adults | No QI intervention | No vaccination rates reported | Review | Multiple reports | Not English | Other |                               |
| Achat          | 1999 | (3)       | 0                     | 0            | 0          | 0                  | 0                             | 1      | 0                | 0           | 0     |                               |
| Alexy          | 1998 | (4)       | 0                     | 1            | 0          | 0                  | 0                             | 0      | 0                | 0           | 0     |                               |
| Anderson       | 1979 | (5)       | 0                     | 1            | 0          | 0                  | 0                             | 0      | 0                | 0           | 0     |                               |
| Anderson       | 2008 | (6)       | 0                     | 0            | 0          | 0                  | 1                             | 0      | 0                | 0           | 0     |                               |
| Anderson       | 2008 | (7)       | 0                     | 1            | 0          | 0                  | 0                             | 0      | 0                | 0           | 0     |                               |
| Andrews        | 2004 | (8)       | 0                     | 1            | 0          | 0                  | 0                             | 0      | 0                | 0           | 0     |                               |
| Andrews        | 2005 | (9)       | 0                     | 1            | 0          | 0                  | 0                             | 0      | 0                | 0           | 0     |                               |
| Anonymous      | 2004 | (10)      | 0                     | 0            | 0          | 0                  | 0                             | 1      | 0                | 0           | 0     |                               |
| Anonymous      | 2005 | (11)      | 1                     | 0            | 0          | 0                  | 0                             | 0      | 0                | 0           | 0     |                               |
| Arthur         | 2001 | (12)      | 0                     | 1            | 0          | 0                  | 0                             | 0      | 0                | 0           | 0     |                               |
| Ashby-Hughes   | 1999 | (13)      | 0                     | 1            | 0          | 0                  | 0                             | 0      | 0                | 0           | 0     |                               |
| Ashikaga       | 1980 | (14)      | 0                     | 0            | 0          | 0                  | 1                             | 0      | 0                | 0           | 0     |                               |
| Baker          | 2002 | (15)      | 0                     | 1            | 0          | 0                  | 0                             | 0      | 0                | 0           | 0     |                               |
| Balas          | 2000 | (16)      | 0                     | 0            | 0          | 0                  | 0                             | 1      | 0                | 0           | 0     |                               |
| Bansal         | 2006 | (17)      | 0                     | 0            | 0          | 1                  | 0                             | 0      | 0                | 0           | 0     |                               |
| Barker         | 1999 | (18)      | 0                     | 1            | 0          | 0                  | 0                             | 0      | 0                | 0           | 0     |                               |
| Bearden        | 2005 | (19)      | 0                     | 1            | 0          | 0                  | 0                             | 0      | 0                | 0           | 0     |                               |
| Bellaard-Smith | 2008 | (20)      | 0                     | 0            | 1          | 0                  | 0                             | 0      | 0                | 0           | 0     |                               |
| Bennett        | 1994 | (21)      | 0                     | 0            | 0          | 0                  | 0                             | 0      | 1                | 0           | 0     |                               |
| Berg           | 2004 | (22)      | 0                     | 0            | 1          | 0                  | 0                             | 0      | 0                | 0           | 0     |                               |
| Berry          | 1996 | (23)      | 0                     | 1            | 0          | 0                  | 0                             | 0      | 0                | 0           | 0     |                               |
| Birchmeier     | 2002 | (24)      | 0                     | 1            | 0          | 0                  | 0                             | 0      | 0                | 0           | 0     |                               |
| Bloom          | 1999 | (25)      | 0                     | 1            | 0          | 0                  | 0                             | 0      | 0                | 0           | 0     |                               |
| Bottum         | 1995 | (26)      | 0                     | 1            | 0          | 0                  | 0                             | 0      | 0                | 0           | 0     |                               |
| Bourdet        | 2003 | (27)      | 1                     | 0            | 0          | 0                  | 0                             | 0      | 0                | 0           | 0     |                               |
| Bourgeois      | 2008 | (28)      | 1                     | 0            | 0          | 0                  | 0                             | 0      | 0                | 0           | 0     |                               |
| Brady          | 1988 | (29)      | 0                     | 1            | 0          | 0                  | 0                             | 0      | 0                | 0           | 0     |                               |
| Breslow        | 1977 | (30)      | 0                     | 0            | 0          | 0                  | 0                             | 1      | 0                | 0           | 0     |                               |

Online Supplementary Data

http://www.annfammed.org/content/10/6/538/DC1

| First author  | Year | Reference | Reasons for exclusion |              |            |                    |                               |        |                  |             |       | Reasons for assigning "other" |
|---------------|------|-----------|-----------------------|--------------|------------|--------------------|-------------------------------|--------|------------------|-------------|-------|-------------------------------|
|               |      |           | Setting               | Uncontrolled | Not adults | No QI intervention | No vaccination rates reported | Review | Multiple reports | Not English | Other |                               |
| Brown         | 2000 | (31)      | 0                     | 1            | 0          | 0                  | 0                             | 0      | 0                | 0           | 0     |                               |
| Bryant        | 2004 | (32)      | 0                     | 0            | 1          | 0                  | 0                             | 0      | 0                | 0           | 0     |                               |
| Byrnes        | 2006 | (33)      | 0                     | 1            | 0          | 0                  | 0                             | 0      | 0                | 0           | 0     |                               |
| CDC           | 1995 | (34)      | 0                     | 1            | 0          | 0                  | 0                             | 0      | 0                | 0           | 0     |                               |
| CDC           | 2003 | (35)      | 0                     | 0            | 0          | 0                  | 0                             | 1      | 0                | 0           | 0     |                               |
| Caulkins      | 1995 | (36)      | 0                     | 0            | 0          | 0                  | 0                             | 0      | 0                | 1           | 0     |                               |
| Clancy        | 1992 | (37)      | 0                     | 1            | 0          | 0                  | 0                             | 0      | 0                | 0           | 0     |                               |
| Clancy        | 2003 | (38)      | 0                     | 0            | 0          | 0                  | 0                             | 1      | 0                | 0           | 0     |                               |
| Cleghorn      | 2004 | (39)      | 0                     | 1            | 0          | 0                  | 0                             | 0      | 0                | 0           | 0     |                               |
| Coady         | 2008 | (40)      | 1                     | 0            | 0          | 0                  | 0                             | 0      | 0                | 0           | 0     |                               |
| Cohen         | 1985 | (41)      | 0                     | 0            | 0          | 0                  | 0                             | 1      | 0                | 0           | 0     |                               |
| Cole          | 1979 | (42)      | 0                     | 1            | 0          | 0                  | 0                             | 0      | 0                | 0           | 0     |                               |
| Coyle         | 2004 | (43)      | 1                     | 0            | 0          | 0                  | 0                             | 0      | 0                | 0           | 0     |                               |
| Crawford      | 2005 | (44)      | 0                     | 1            | 0          | 0                  | 0                             | 0      | 0                | 0           | 0     |                               |
| d'Abbs        | 2008 | (45)      | 0                     | 1            | 0          | 0                  | 0                             | 0      | 0                | 0           | 0     |                               |
| Daniels       | 2007 | (46)      | 0                     | 0            | 0          | 0                  | 0                             | 1      | 0                | 0           | 0     |                               |
| Davidson      | 1984 | (47)      | 0                     | 1            | 0          | 0                  | 0                             | 0      | 0                | 0           | 0     |                               |
| De Bruyn      | 2008 | (48)      | 0                     | 0            | 0          | 0                  | 0                             | 0      | 0                | 0           | 1     |                               |
| De Wals       | 1996 | (49)      | 0                     | 0            | 0          | 0                  | 0                             | 0      | 0                | 0           | 1     |                               |
| Dettori       | 2005 | (50)      | 0                     | 1            | 0          | 0                  | 0                             | 0      | 0                | 0           | 0     |                               |
| Dexheimer     | 2006 | (51)      | 0                     | 1            | 0          | 0                  | 0                             | 0      | 0                | 0           | 0     |                               |
| Dexheimer     | 2006 | (52)      | 0                     | 0            | 0          | 0                  | 0                             | 0      | 0                | 0           | 0     | Unpublished thesis.           |
| Dexheimer     | 2008 | (53)      | 0                     | 1            | 0          | 0                  | 0                             | 0      | 0                | 0           | 0     |                               |
| Dexter        | 2001 | (54)      | 1                     | 0            | 0          | 0                  | 0                             | 0      | 0                | 0           | 0     |                               |
| Dexter        | 2004 | (55)      | 1                     | 0            | 0          | 0                  | 0                             | 0      | 0                | 0           | 0     |                               |
| Diaz Gravalos | 1999 | (56)      | 0                     | 0            | 0          | 0                  | 0                             | 0      | 0                | 0           | 1     |                               |
| Doyle         | 2001 | (57)      | 1                     | 0            | 0          | 0                  | 0                             | 0      | 0                | 0           | 0     |                               |
| Elangovan     | 1996 | (58)      | 0                     | 1            | 0          | 0                  | 0                             | 0      | 0                | 0           | 0     |                               |
| Etkind        | 1996 | (59)      | 0                     | 0            | 0          | 0                  | 0                             | 1      | 0                | 0           | 0     |                               |
| Ettner        | 2006 | (60)      | 0                     | 1            | 0          | 0                  | 0                             | 0      | 0                | 0           | 0     |                               |
| Falconer      | 2008 | (61)      | 0                     | 0            | 0          | 0                  | 1                             | 0      | 0                | 0           | 0     |                               |

Online Supplementary Data

<http://www.annfammed.org/content/10/6/538/DC1>

| First author | Year | Reference | Reasons for exclusion |              |            |                    |                               |        |                  |             |       | Reasons for assigning "other" |
|--------------|------|-----------|-----------------------|--------------|------------|--------------------|-------------------------------|--------|------------------|-------------|-------|-------------------------------|
|              |      |           | Setting               | Uncontrolled | Not adults | No QI intervention | No vaccination rates reported | Review | Multiple reports | Not English | Other |                               |
| Farmer       | 2001 | (62)      | 0                     | 1            | 0          | 0                  | 0                             | 0      | 0                | 0           | 0     |                               |
| Fedson       | 1984 | (63)      | 0                     | 0            | 0          | 0                  | 1                             | 0      | 0                | 0           | 0     |                               |
| Fera         | 2008 | (64)      | 0                     | 1            | 0          | 0                  | 0                             | 0      | 0                | 0           | 0     |                               |
| Fera         | 2009 | (65)      | 0                     | 1            | 0          | 0                  | 0                             | 0      | 0                | 0           | 0     |                               |
| Fischer      | 2008 | (66)      | 0                     | 0            | 0          | 0                  | 0                             | 0      | 0                | 0           | 1     | Study design only             |
| Fishbein     | 2006 | (67)      | 0                     | 1            | 0          | 0                  | 0                             | 0      | 0                | 0           | 0     |                               |
| Flanagan     | 1999 | (68)      | 0                     | 0            | 0          | 0                  | 1                             | 0      | 0                | 0           | 0     |                               |
| Fontanesi    | 2006 | (69)      | 0                     | 0            | 0          | 0                  | 1                             | 0      | 0                | 0           | 0     |                               |
| Franzini     | 2007 | (70)      | 0                     | 0            | 1          | 0                  | 0                             | 0      | 0                | 0           | 0     |                               |
| Fuchs        | 2006 | (71)      | 0                     | 1            | 0          | 0                  | 0                             | 0      | 0                | 0           | 0     |                               |
| Galbis-Reig  | 2001 | (72)      | 0                     | 1            | 0          | 0                  | 0                             | 0      | 0                | 0           | 0     |                               |
| Gamble       | 2008 | (73)      | 0                     | 1            | 0          | 0                  | 0                             | 0      | 0                | 0           | 0     |                               |
| Garrett      | 1986 | (74)      | 0                     | 0            | 0          | 0                  | 1                             | 0      | 0                | 0           | 0     |                               |
| Garrett      | 2005 | (75)      | 0                     | 1            | 0          | 0                  | 0                             | 0      | 0                | 0           | 0     |                               |
| Gemson       | 1995 | (76)      | 0                     | 0            | 0          | 0                  | 1                             | 0      | 0                | 0           | 0     |                               |
| Gerard       | 2008 | (77)      | 1                     | 0            | 0          | 0                  | 0                             | 0      | 0                | 0           | 0     |                               |
| Gill         | 1998 | (78)      | 0                     | 1            | 0          | 0                  | 0                             | 0      | 0                | 0           | 0     |                               |
| Gill         | 1999 | (79)      | 0                     | 1            | 0          | 0                  | 0                             | 0      | 0                | 0           | 0     |                               |
| Gill         | 2000 | (80)      | 0                     | 1            | 0          | 0                  | 0                             | 0      | 0                | 0           | 0     |                               |
| Gill         | 2001 | (81)      | 0                     | 1            | 0          | 0                  | 0                             | 0      | 0                | 0           | 0     |                               |
| Gill         | 2004 | (82)      | 0                     | 1            | 0          | 0                  | 0                             | 0      | 0                | 0           | 0     |                               |
| Ginson       | 2000 | (83)      | 1                     | 0            | 0          | 0                  | 0                             | 0      | 0                | 0           | 0     |                               |
| Goebel       | 1997 | (84)      | 0                     | 1            | 0          | 0                  | 0                             | 0      | 0                | 0           | 0     |                               |
| Golden       | 2002 | (85)      | 0                     | 1            | 0          | 0                  | 0                             | 0      | 0                | 0           | 0     |                               |
| Grey         | 2002 | (86)      | 0                     | 0            | 0          | 0                  | 1                             | 0      | 0                | 0           | 0     |                               |
| Gruber       | 2000 | (87)      | 0                     | 1            | 0          | 0                  | 0                             | 0      | 0                | 0           | 0     |                               |
| Guldberg     | 2009 | (88)      | 0                     | 0            | 0          | 0                  | 0                             | 1      | 0                | 0           | 0     |                               |
| Hak          | 1997 | (89)      | 0                     | 1            | 0          | 0                  | 0                             | 0      | 0                | 0           | 0     |                               |
| Hak          | 1998 | (90)      | 0                     | 1            | 0          | 0                  | 0                             | 0      | 0                | 0           | 0     |                               |
| Hak          | 2000 | (91)      | 0                     | 1            | 0          | 0                  | 0                             | 0      | 0                | 0           | 0     |                               |
| Hannah       | 2005 | (92)      | 1                     | 0            | 0          | 0                  | 0                             | 0      | 0                | 0           | 0     |                               |

Online Supplementary Data

<http://www.annfammed.org/content/10/6/538/DC1>

| First author | Year | Reference | Reasons for exclusion |              |            |                    |                               |        |                  |             |       | Reasons for assigning "other" |  |
|--------------|------|-----------|-----------------------|--------------|------------|--------------------|-------------------------------|--------|------------------|-------------|-------|-------------------------------|--|
|              |      |           | Setting               | Uncontrolled | Not adults | No QI intervention | No vaccination rates reported | Review | Multiple reports | Not English | Other |                               |  |
| Harris       | 2006 | (93)      | 0                     | 0            | 0          | 0                  | 0                             | 0      | 0                | 1           | 0     | 0                             |  |
| Henk         | 1975 | (94)      | 0                     | 1            | 0          | 0                  | 0                             | 0      | 0                | 0           | 0     | 0                             |  |
| Hicks        | 2007 | (95)      | 0                     | 0            | 1          | 0                  | 0                             | 0      | 0                | 0           | 0     | 0                             |  |
| Hogg         | 2008 | (96)      | 0                     | 0            | 1          | 0                  | 0                             | 0      | 0                | 0           | 0     | 0                             |  |
| Honkanen     | 1997 | (97)      | 0                     | 0            | 0          | 1                  | 0                             | 0      | 0                | 0           | 0     | 0                             |  |
| Honkanen     | 2006 | (98)      | 0                     | 0            | 0          | 1                  | 0                             | 0      | 0                | 0           | 0     | 0                             |  |
| Houston      | 2006 | (99)      | 0                     | 1            | 0          | 0                  | 0                             | 0      | 0                | 0           | 0     | 0                             |  |
| Humair       | 2002 | (100)     | 0                     | 1            | 0          | 0                  | 0                             | 0      | 0                | 0           | 0     | 0                             |  |
| Hussain      | 2006 | (101)     | 0                     | 1            | 0          | 0                  | 0                             | 0      | 0                | 0           | 0     | 0                             |  |
| Hutchison    | 1991 | (102)     | 0                     | 1            | 0          | 0                  | 0                             | 0      | 0                | 0           | 0     | 0                             |  |
| Irogoyen     | 2006 | (103)     | 0                     | 0            | 1          | 0                  | 0                             | 0      | 0                | 0           | 0     | 0                             |  |
| Jha          | 2003 | (104)     | 1                     | 0            | 0          | 0                  | 0                             | 0      | 0                | 0           | 0     | 0                             |  |
| Jha          | 2003 | (105)     | 0                     | 1            | 0          | 0                  | 0                             | 0      | 0                | 0           | 0     | 0                             |  |
| Jha          | 2007 | (106)     | 1                     | 0            | 0          | 0                  | 0                             | 0      | 0                | 0           | 0     | 0                             |  |
| Johnson      | 2005 | (107)     | 0                     | 1            | 0          | 0                  | 0                             | 0      | 0                | 0           | 0     | 0                             |  |
| Johnson      | 2008 | (108)     | 0                     | 1            | 0          | 0                  | 0                             | 0      | 0                | 0           | 0     | 0                             |  |
| Jones        | 2008 | (109)     | 0                     | 1            | 0          | 0                  | 0                             | 0      | 0                | 0           | 0     | 0                             |  |
| Joshi        | 2009 | (110)     | 0                     | 0            | 1          | 0                  | 0                             | 0      | 0                | 0           | 0     | 0                             |  |
| Juma         | 2000 | (111)     | 0                     | 1            | 0          | 0                  | 0                             | 0      | 0                | 0           | 0     | 0                             |  |
| Kamal        | 2003 | (112)     | 0                     | 1            | 0          | 0                  | 0                             | 0      | 0                | 0           | 0     | 0                             |  |
| Keyhani      | 2007 | (113)     | 0                     | 1            | 0          | 0                  | 0                             | 0      | 0                | 0           | 0     | 0                             |  |
| Kleschen     | 2000 | (114)     | 0                     | 1            | 0          | 0                  | 0                             | 0      | 0                | 0           | 0     | 0                             |  |
| Knoell       | 1991 | (115)     | 0                     | 1            | 0          | 0                  | 0                             | 0      | 0                | 0           | 0     | 0                             |  |
| Kumar        | 1999 | (116)     | 1                     | 0            | 0          | 0                  | 0                             | 0      | 0                | 0           | 0     | 0                             |  |
| Landis       | 1995 | (117)     | 1                     | 0            | 0          | 0                  | 0                             | 0      | 0                | 0           | 0     | 0                             |  |
| Larson       | 1979 | (118)     | 0                     | 1            | 0          | 0                  | 0                             | 0      | 0                | 0           | 0     | 0                             |  |
| Larson       | 2009 | (119)     | 0                     | 0            | 1          | 0                  | 0                             | 0      | 0                | 0           | 0     | 0                             |  |
| Lave         | 1996 | (120)     | 0                     | 0            | 0          | 0                  | 0                             | 0      | 1                | 0           | 0     | 0                             |  |
| Lawson       | 2000 | (121)     | 1                     | 0            | 0          | 0                  | 0                             | 0      | 0                | 0           | 0     | 0                             |  |
| Lee          | 2003 | (122)     | 0                     | 0            | 0          | 0                  | 0                             | 0      | 0                | 1           | 0     | 0                             |  |
| Litt         | 1991 | (123)     | 0                     | 0            | 0          | 0                  | 0                             | 1      | 0                | 0           | 0     | 0                             |  |

Online Supplementary Data

http://www.annfammed.org/content/10/6/538/DC1

| First author | Year  | Reference | Reasons for exclusion |              |            |                    |                               |        |                  |             |       | Reasons for assigning "other" |                                               |
|--------------|-------|-----------|-----------------------|--------------|------------|--------------------|-------------------------------|--------|------------------|-------------|-------|-------------------------------|-----------------------------------------------|
|              |       |           | Setting               | Uncontrolled | Not adults | No QI intervention | No vaccination rates reported | Review | Multiple reports | Not English | Other |                               |                                               |
| Loughlin     | 2007  | (124)     | 0                     | 1            | 0          | 0                  | 0                             | 0      | 0                | 0           | 0     | 0                             |                                               |
| Luthi        | 2002  | (125)     | 0                     | 1            | 0          | 0                  | 0                             | 0      | 0                | 0           | 0     | 0                             |                                               |
| MacIntyre    | 2003  | (126)     | 1                     | 0            | 0          | 0                  | 0                             | 0      | 0                | 0           | 0     | 0                             |                                               |
| Mackey       | 2005  | (127)     | 0                     | 1            | 0          | 0                  | 0                             | 0      | 0                | 0           | 0     | 0                             |                                               |
| Malmvall     | 2007  | (128)     | 0                     | 1            | 0          | 0                  | 0                             | 0      | 0                | 0           | 0     | 0                             |                                               |
| Mandel       | 12598 | (129)     | 0                     | 0            | 0          | 0                  | 0                             | 1      | 0                | 0           | 0     | 0                             |                                               |
| Mangione     | 2006  | (130)     | 0                     | 1            | 0          | 0                  | 0                             | 0      | 0                | 0           | 0     | 0                             |                                               |
| Marino       | 1998  | (131)     | 0                     | 1            | 0          | 0                  | 0                             | 0      | 0                | 0           | 0     | 0                             |                                               |
| Marrero      | 2006  | (132)     | 0                     | 0            | 0          | 0                  | 0                             | 0      | 0                | 0           | 1     | 0                             |                                               |
| Maskrey      | 1997  | (133)     | 0                     | 0            | 0          | 0                  | 0                             | 0      | 1                | 0           | 0     | 0                             |                                               |
| McCord       | 2006  | (134)     | 0                     | 1            | 0          | 0                  | 0                             | 0      | 0                | 0           | 0     | 0                             |                                               |
| McDonald     | 1980  | (135)     | 0                     | 0            | 0          | 0                  | 0                             | 1      | 0                | 0           | 0     | 0                             |                                               |
| McDonald     | 1992  | (136)     | 0                     | 0            | 0          | 0                  | 0                             | 0      | 0                | 1           | 0     | 0                             |                                               |
| McDonald     | 1997  | (137)     | 0                     | 1            | 0          | 0                  | 0                             | 0      | 0                | 0           | 0     | 0                             |                                               |
| McDowell     | 1990  | (138)     | 0                     | 0            | 0          | 0                  | 0                             | 0      | 0                | 1           | 0     | 0                             |                                               |
| Milman       | 2005  | (139)     | 0                     | 1            | 0          | 0                  | 0                             | 0      | 0                | 0           | 0     | 0                             |                                               |
| Mosesso      | 2003  | (140)     | 0                     | 1            | 0          | 0                  | 0                             | 0      | 0                | 0           | 0     | 0                             |                                               |
| Nichol       | 1992  | (141)     | 0                     | 1            | 0          | 0                  | 0                             | 0      | 0                | 0           | 0     | 0                             |                                               |
| Nichol       | 1998  | (142)     | 0                     | 1            | 0          | 0                  | 0                             | 0      | 0                | 0           | 0     | 0                             |                                               |
| Niroshan     | 2003  | (143)     | 0                     | 1            | 0          | 0                  | 0                             | 0      | 0                | 0           | 0     | 0                             |                                               |
| Norton       | 1997  | (144)     | 0                     | 0            | 0          | 0                  | 0                             | 0      | 0                | 0           | 0     | 1                             | Abstract only, results incompletely reported. |
| Nowalk       | 2008  | (145)     | 0                     | 0            | 1          | 0                  | 0                             | 0      | 0                | 0           | 0     | 0                             |                                               |
| Ogburn       | 2007  | (146)     | 0                     | 1            | 0          | 0                  | 0                             | 0      | 0                | 0           | 0     | 0                             |                                               |
| Ogden        | 1993  | (147)     | 0                     | 0            | 0          | 0                  | 0                             | 0      | 0                | 0           | 0     | 1                             | News report                                   |
| Onder        | 2008  | (148)     | 0                     | 1            | 0          | 0                  | 0                             | 0      | 0                | 0           | 0     | 0                             |                                               |
| Ovbiagele    | 2009  | (149)     | 1                     | 0            | 0          | 0                  | 0                             | 0      | 0                | 0           | 0     | 0                             |                                               |
| Parry        | 2004  | (150)     | 1                     | 0            | 0          | 0                  | 0                             | 0      | 0                | 0           | 0     | 0                             |                                               |
| Patel        | 2004  | (151)     | 0                     | 1            | 0          | 0                  | 0                             | 0      | 0                | 0           | 0     | 0                             |                                               |
| Pearson      | 1998  | (152)     | 0                     | 1            | 0          | 0                  | 0                             | 0      | 0                | 0           | 0     | 0                             |                                               |
| Pearson      | 2005  | (153)     | 0                     | 1            | 0          | 0                  | 0                             | 0      | 0                | 0           | 0     | 0                             |                                               |
| Perenboom    | 1996  | (154)     | 0                     | 1            | 0          | 0                  | 0                             | 0      | 0                | 0           | 0     | 0                             |                                               |

Online Supplementary Data

<http://www.annfammed.org/content/10/6/538/DC1>

| First author | Year | Reference | Reasons for exclusion |              |            |                    |                               |        |                  |             |       | Reasons for assigning "other" |                                              |
|--------------|------|-----------|-----------------------|--------------|------------|--------------------|-------------------------------|--------|------------------|-------------|-------|-------------------------------|----------------------------------------------|
|              |      |           | Setting               | Uncontrolled | Not adults | No QI intervention | No vaccination rates reported | Review | Multiple reports | Not English | Other |                               |                                              |
| Peters       | 1995 | (155)     | 0                     | 0            | 0          | 0                  | 0                             | 0      | 0                | 0           | 0     | 1                             | Unpublished thesis.                          |
| Ploeg        | 1994 | (156)     | 0                     | 0            | 0          | 0                  | 0                             | 1      | 0                | 0           | 0     | 0                             |                                              |
| Puig-Barbera | 1999 | (157)     | 0                     | 0            | 0          | 0                  | 0                             | 0      | 0                | 0           | 1     | 0                             |                                              |
| Redfield     | 2000 | (158)     | 0                     | 1            | 0          | 0                  | 0                             | 0      | 0                | 0           | 0     | 0                             |                                              |
| Reilly       | 1997 | (159)     | 0                     | 0            | 0          | 0                  | 0                             | 0      | 0                | 0           | 0     | 1                             | Abstract only, results incompletely reported |
| Reuben       | 1996 | (160)     | 0                     | 1            | 0          | 0                  | 0                             | 0      | 0                | 0           | 0     | 0                             |                                              |
| Reynolds     | 2008 | (161)     | 0                     | 1            | 0          | 0                  | 0                             | 0      | 0                | 0           | 0     | 0                             |                                              |
| Rhew         | 1999 | (162)     | 0                     | 0            | 0          | 0                  | 0                             | 1      | 0                | 0           | 0     | 0                             |                                              |
| Rimple       | 2006 | (163)     | 0                     | 1            | 0          | 0                  | 0                             | 0      | 0                | 0           | 0     | 0                             |                                              |
| Rodney       | 1983 | (164)     | 0                     | 1            | 0          | 0                  | 0                             | 0      | 0                | 0           | 0     | 0                             |                                              |
| Rosser       | 1991 | (165)     | 0                     | 0            | 0          | 0                  | 0                             | 0      | 0                | 1           | 0     | 0                             |                                              |
| Russell      | 2001 | (166)     | 0                     | 1            | 0          | 0                  | 0                             | 0      | 0                | 0           | 0     | 0                             |                                              |
| Salman       | 2005 | (167)     | 0                     | 1            | 0          | 0                  | 0                             | 0      | 0                | 0           | 0     | 0                             |                                              |
| Schectman    | 2005 | (168)     | 0                     | 1            | 0          | 0                  | 0                             | 0      | 0                | 0           | 0     | 0                             |                                              |
| Scheurer     | 2006 | (169)     | 1                     | 0            | 0          | 0                  | 0                             | 0      | 0                | 0           | 0     | 0                             |                                              |
| Schluter     | 1999 | (170)     | 1                     | 0            | 0          | 0                  | 0                             | 0      | 0                | 0           | 0     | 0                             |                                              |
| Setia        | 1985 | (171)     | 1                     | 0            | 0          | 0                  | 0                             | 0      | 0                | 0           | 0     | 0                             |                                              |
| Shahrabani   | 2010 | (172)     | 0                     | 0            | 0          | 0                  | 1                             | 0      | 0                | 0           | 0     | 0                             |                                              |
| Sheikh       | 1998 | (173)     | 0                     | 1            | 0          | 0                  | 0                             | 0      | 0                | 0           | 0     | 0                             |                                              |
| Shenson      | 2008 | (174)     | 0                     | 1            | 0          | 0                  | 0                             | 0      | 0                | 0           | 0     | 0                             |                                              |
| Sherman      | 2002 | (175)     | 0                     | 0            | 0          | 0                  | 0                             | 0      | 1                | 0           | 0     | 0                             |                                              |
| Shevlin      | 2002 | (176)     | 1                     | 0            | 0          | 0                  | 0                             | 0      | 0                | 0           | 0     | 0                             |                                              |
| Siriwardena  | 1999 | (177)     | 0                     | 1            | 0          | 0                  | 0                             | 0      | 0                | 0           | 0     | 0                             |                                              |
| Siriwardena  | 2003 | (178)     | 0                     | 1            | 0          | 0                  | 0                             | 0      | 0                | 0           | 0     | 0                             |                                              |
| Siriwardena  | 2007 | (179)     | 0                     | 1            | 0          | 0                  | 0                             | 0      | 0                | 0           | 0     | 0                             |                                              |
| Sivaprakasam | 2008 | (180)     | 0                     | 0            | 0          | 0                  | 1                             | 0      | 0                | 0           | 0     | 0                             |                                              |
| Slobodkin    | 1998 | (181)     | 0                     | 1            | 0          | 0                  | 0                             | 0      | 0                | 0           | 0     | 0                             |                                              |
| Slobodkin    | 1998 | (182)     | 0                     | 1            | 0          | 0                  | 0                             | 0      | 0                | 0           | 0     | 0                             |                                              |
| Song         | 2000 | (183)     | 0                     | 0            | 0          | 0                  | 0                             | 0      | 0                | 0           | 1     | 0                             |                                              |
| Stevenson    | 2000 | (184)     | 1                     | 0            | 0          | 0                  | 0                             | 0      | 0                | 0           | 0     | 0                             |                                              |
| Stone        | 2002 | (185)     | 0                     | 0            | 0          | 0                  | 0                             | 0      | 1                | 0           | 0     | 0                             |                                              |

Online Supplementary Data

<http://www.annfammed.org/content/10/6/538/DC1>

| First author  | Year | Reference | Reasons for exclusion |              |            |                    |                               |        |                  |             |       | Reasons for assigning "other" |
|---------------|------|-----------|-----------------------|--------------|------------|--------------------|-------------------------------|--------|------------------|-------------|-------|-------------------------------|
|               |      |           | Setting               | Uncontrolled | Not adults | No QI intervention | No vaccination rates reported | Review | Multiple reports | Not English | Other |                               |
| Strine        | 2005 | (186)     | 0                     | 0            | 0          | 1                  | 0                             | 0      | 0                | 0           | 0     | 0                             |
| Szilagyi      | 2003 | (187)     | 0                     | 0            | 0          | 0                  | 0                             | 1      | 0                | 0           | 0     | 0                             |
| Taylor        | 2007 | (188)     | 0                     | 1            | 0          | 0                  | 0                             | 0      | 0                | 0           | 0     | 0                             |
| Thomas        | 2005 | (189)     | 1                     | 0            | 0          | 0                  | 0                             | 0      | 0                | 0           | 0     | 0                             |
| Traeger       | 2006 | (190)     | 0                     | 0            | 1          | 0                  | 0                             | 0      | 0                | 0           | 0     | 0                             |
| Trick         | 2009 | (191)     | 1                     | 0            | 0          | 0                  | 0                             | 0      | 0                | 0           | 0     | 0                             |
| Tucker        | 1987 | (192)     | 0                     | 1            | 0          | 0                  | 0                             | 0      | 0                | 0           | 0     | 0                             |
| Turner        | 1989 | (193)     | 0                     | 0            | 0          | 0                  | 1                             | 0      | 0                | 0           | 0     | 0                             |
| Van Amburgh   | 2001 | (194)     | 0                     | 1            | 0          | 0                  | 0                             | 0      | 0                | 0           | 0     | 0                             |
| Van Essen     | 1997 | (195)     | 0                     | 1            | 0          | 0                  | 0                             | 0      | 0                | 0           | 0     | 0                             |
| Van Hoof      | 2001 | (196)     | 0                     | 1            | 0          | 0                  | 0                             | 0      | 0                | 0           | 0     | 0                             |
| Vann          | 2005 | (197)     | 0                     | 0            | 0          | 0                  | 0                             | 1      | 0                | 0           | 0     | 0                             |
| Vila-Corcoles | 2006 | (198)     | 0                     | 0            | 0          | 1                  | 0                             | 0      | 0                | 0           | 0     | 0                             |
| Vincent       | 1995 | (199)     | 0                     | 1            | 0          | 0                  | 0                             | 0      | 0                | 0           | 0     | 0                             |
| Vondracek     | 1998 | (200)     | 1                     | 0            | 0          | 0                  | 0                             | 0      | 0                | 0           | 0     | 0                             |
| Wallis        | 2006 | (201)     | 0                     | 1            | 0          | 0                  | 0                             | 0      | 0                | 0           | 0     | 0                             |
| Weatherill    | 2004 | (202)     | 0                     | 1            | 0          | 0                  | 0                             | 0      | 0                | 0           | 0     | 0                             |
| Weaver        | 2007 | (203)     | 0                     | 1            | 0          | 0                  | 0                             | 0      | 0                | 0           | 0     | 0                             |
| Weber         | 2008 | (204)     | 0                     | 1            | 0          | 0                  | 0                             | 0      | 0                | 0           | 0     | 0                             |
| Wee           | 2001 | (205)     | 0                     | 1            | 0          | 0                  | 0                             | 0      | 0                | 0           | 0     | 0                             |
| Weitzel       | 2000 | (206)     | 0                     | 1            | 0          | 0                  | 0                             | 0      | 0                | 0           | 0     | 0                             |
| Welch         | 2006 | (207)     | 0                     | 1            | 0          | 0                  | 0                             | 0      | 0                | 0           | 0     | 0                             |
| Wray          | 2009 | (208)     | 0                     | 0            | 0          | 0                  | 1                             | 0      | 0                | 0           | 0     | 0                             |
| Young         | 2004 | (209)     | 0                     | 1            | 0          | 0                  | 0                             | 0      | 0                | 0           | 0     | 0                             |
| Zimmerman     | 2003 | (210)     | 0                     | 1            | 0          | 0                  | 0                             | 0      | 0                | 0           | 0     | 0                             |

**Online Supplementary Data**

<http://www.annfammed.org/content/10/6/538/DC1>

**Exhibit A.4. Reasons for exclusion**

|                             | <b>Setting</b> | <b>Uncontrolled</b> | <b>Not adults</b> | <b>No QI intervention</b> | <b>No vaccination rates reported</b> | <b>Review</b> | <b>Multiple reports</b> | <b>Not English</b> | <b>Other</b> | <b>Reasons for assigning "other"</b>                                              |
|-----------------------------|----------------|---------------------|-------------------|---------------------------|--------------------------------------|---------------|-------------------------|--------------------|--------------|-----------------------------------------------------------------------------------|
| Electronic search citations | 27             | 110                 | 11                | 8                         | 11                                   | 10            | 6                       | 7                  | 6            | Study design only (1), unpublished thesis (2), abstract only (2), news report (1) |
| Reference list citations    | 0              | 2                   | 0                 | 0                         | 8                                    | 1             | 1                       | 0                  | 0            | None                                                                              |
| <b>Total</b>                | 27             | 112                 | 11                | 8                         | 19                                   | 11            | 7                       | 7                  | 6            | <b>Total = 207</b>                                                                |



Online Supplementary Data

http://www.annfammed.org/content/10/6/538/DC1

Exhibit A.5. Included studies

| Study/Author            | Study design                                                                                                                                                | Study population                                                                                                                                                                                                                                                                                                                                                                                                                                                                                                                                                                                                                                                   | Setting                                                                                                                                                                                                                                 | Intervention summary                                                                                                                                                                                                                                                                                                                                                                                                                                                                                                                                                                                                                                                                                                                                                                                                                                                                                                                                                                                                                                                                                                                                                                                                                                                                                 | Vaccination outcomes                                                                                                                                                                                                          | Vaccination results                                                                                                                                                                                                                                                                                                                                                                                                                                                                                                                                                                                  | Study conclusions                                                                                                                                                                                                                                                                                                                                                                                                                                                                                                                                                                                                                                                                                                                                                                                                                                                                                                                                                                                               | Quality score |
|-------------------------|-------------------------------------------------------------------------------------------------------------------------------------------------------------|--------------------------------------------------------------------------------------------------------------------------------------------------------------------------------------------------------------------------------------------------------------------------------------------------------------------------------------------------------------------------------------------------------------------------------------------------------------------------------------------------------------------------------------------------------------------------------------------------------------------------------------------------------------------|-----------------------------------------------------------------------------------------------------------------------------------------------------------------------------------------------------------------------------------------|------------------------------------------------------------------------------------------------------------------------------------------------------------------------------------------------------------------------------------------------------------------------------------------------------------------------------------------------------------------------------------------------------------------------------------------------------------------------------------------------------------------------------------------------------------------------------------------------------------------------------------------------------------------------------------------------------------------------------------------------------------------------------------------------------------------------------------------------------------------------------------------------------------------------------------------------------------------------------------------------------------------------------------------------------------------------------------------------------------------------------------------------------------------------------------------------------------------------------------------------------------------------------------------------------|-------------------------------------------------------------------------------------------------------------------------------------------------------------------------------------------------------------------------------|------------------------------------------------------------------------------------------------------------------------------------------------------------------------------------------------------------------------------------------------------------------------------------------------------------------------------------------------------------------------------------------------------------------------------------------------------------------------------------------------------------------------------------------------------------------------------------------------------|-----------------------------------------------------------------------------------------------------------------------------------------------------------------------------------------------------------------------------------------------------------------------------------------------------------------------------------------------------------------------------------------------------------------------------------------------------------------------------------------------------------------------------------------------------------------------------------------------------------------------------------------------------------------------------------------------------------------------------------------------------------------------------------------------------------------------------------------------------------------------------------------------------------------------------------------------------------------------------------------------------------------|---------------|
| Ahmed et al. 2004 (211) | Design: Cluster RCT<br><br>Group allocation: Experimental study with employers allocated to treatment and control groups.<br><br>Follow-up period: 5 months | Number of patients: 3996<br><br><u>Group 1</u><br>Number of patients: 890<br>Female/male: 498/392<br>Age (median): 52<br><br><u>Group 2</u><br>Number of patients: 1138<br>Female/male: 626/512<br>Age (mean(sd)): 52<br><br><u>Group 3</u><br>Number of patients: 1039<br>Female/male: 603/436<br>Age (mean(sd)): 52<br><br><u>Control</u><br>Number of patients: 929<br>Female/male: 511/418<br>Age (mean(sd)): 52<br><br><u>Eligibility criteria:</u><br><br>Patients aged 18 to 64 years with high risk conditions, enrolled in a participating managed care organization.<br><br>Employers claiming 3 or more eligible patients as subscribers or dependents. | Number of sites: 505<br>Employers participating in a large MCO<br><br>Site affiliation: Private business, private MCO<br><br>Number of practices or physicians: Not reported / not applicable<br><br>Location: United States (Colorado) | <u>Single post card reminder vs single post card reminder and employer outreach toolkit vs two sequential post card reminders vs two sequential post card reminders and employer outreach toolkit</u><br><br>Intervention aim: Improve vaccination rates<br>QI agent: Managed care plan<br><br><u>Group 1 - Single reminder postcard and employer toolkit</u><br><br>Patient education / reminders: Patients received postcards strongly recommending influenza vaccination: "It could save your life." Additionally, influenza tool kits were mailed to health plan employers. Tool kits included flyers, posters, newsletter articles, E-mail and payroll stuffer communications to encourage vaccination.<br><br>Delivery site change: Employers were provided with support implementing work site, employer-sponsored influenza vaccination clinics.<br><br><u>Group 2 – Two reminder postcards</u><br>As above for group 1, except with two sequential postcards.<br><br><u>Group 3 – Two reminder postcards and employer toolkit</u><br>As above for Group 2, except with two sequential postcards.<br><br><u>Control - Single reminder postcard</u><br><br>Patient education / reminders: Patients received postcards strongly recommending influenza vaccination: "It could save your life." | <u>Influenza</u><br>Proportion of eligible patients receiving vaccination<br><br><br><br><br><br>Risk and odds ratio of receiving vaccination relative to Group 1<br><br><br><br><br><br><u>Pneumococcal</u><br>Not targeted. | <u>Influenza</u><br>Baseline<br>Groups 1-4: 81%-83%<br><br>Follow-up*<br>Age 18-49<br>Control: 241/400 (60%)<br>Group 1: 205/360 (57%)<br>Group 2: 261/479 (54%)<br>Group 3: 241/406 (59%)<br><br>Age 50-64<br>Control: 387/529 (73%)<br>Group 1: 412/530 (78%)<br>Group 2: 512/659 (78%)<br>Group 3: 494/633 (78%)<br><br>Follow-up**<br>Age 18-49<br>Group 1 OR = 0.92<br>Group 2 OR = 0.83<br>Group 3 OR = 1.04<br><br>Age 50-64<br>Group 1 OR = 1.26<br>Group 2 OR = 1.42***<br>Group 3 OR = 1.44***<br><br><u>Pneumococcal</u><br>Not targeted.<br><br>*, **, *** - Notes, see column at right. | A second postcard reminder increased influenza vaccination by 4% among 50- to 64- year old persons with high-risk conditions, but did not have any effect among younger adults. Influenza tool kits mailed to employers did not have any incremental effect among persons who were mailed single or multiple postcard reminders.<br><br>Interventions should be evaluated in different population subgroups. Developing methods to more effectively encourage employers to use tool kits such as the one trialed here merits attention.<br><br>* Crude proportions.<br><br>** Adjusted for age, sex, marital status, subscriber status, managed care organization, work-site flu shot clinics, and receipt of prior flu shot.<br><br>*** Significant at p<0.05. The authors performed a secondary analysis combining control and group 1, and groups 2 and 3. OR for vaccination due to receiving a second postcard was 0.96 (95% CI [0.75, 1.22]) for age 18-49, and 1.29 (95% CI [1.02, 1.64]) for age 50-64. | 24            |
| Apkon et al. 2005 (212) | Design: CCT                                                                                                                                                 | Number of patients: 1902                                                                                                                                                                                                                                                                                                                                                                                                                                                                                                                                                                                                                                           | Number of sites: 2<br>"military treatment"                                                                                                                                                                                              | <u>Clinical decision support system vs usual care</u>                                                                                                                                                                                                                                                                                                                                                                                                                                                                                                                                                                                                                                                                                                                                                                                                                                                                                                                                                                                                                                                                                                                                                                                                                                                | <u>Influenza</u><br>Not targeted.                                                                                                                                                                                             | <u>Influenza</u><br>Not targeted.                                                                                                                                                                                                                                                                                                                                                                                                                                                                                                                                                                    | Implementing a specific decision support tool in a primary care                                                                                                                                                                                                                                                                                                                                                                                                                                                                                                                                                                                                                                                                                                                                                                                                                                                                                                                                                 | 20            |

Online Supplementary Data

http://www.annfammed.org/content/10/6/538/DC1

|                                    |                                                                                                                                                                                |                                                                                                                                                                                                                                                                                                                                                                                                                                                                                                                                                                            |                                                                                                                                                                                            |                                                                                                                                                                                                                                                                                                                                                                                                                                                                                                                                                                                                                                                                                                                      |                                                                                                                                                                            |                                                                                                                                                                                                                                                                                                                                                                                                            |                                                                                                                                                                                                                                                                                                |           |
|------------------------------------|--------------------------------------------------------------------------------------------------------------------------------------------------------------------------------|----------------------------------------------------------------------------------------------------------------------------------------------------------------------------------------------------------------------------------------------------------------------------------------------------------------------------------------------------------------------------------------------------------------------------------------------------------------------------------------------------------------------------------------------------------------------------|--------------------------------------------------------------------------------------------------------------------------------------------------------------------------------------------|----------------------------------------------------------------------------------------------------------------------------------------------------------------------------------------------------------------------------------------------------------------------------------------------------------------------------------------------------------------------------------------------------------------------------------------------------------------------------------------------------------------------------------------------------------------------------------------------------------------------------------------------------------------------------------------------------------------------|----------------------------------------------------------------------------------------------------------------------------------------------------------------------------|------------------------------------------------------------------------------------------------------------------------------------------------------------------------------------------------------------------------------------------------------------------------------------------------------------------------------------------------------------------------------------------------------------|------------------------------------------------------------------------------------------------------------------------------------------------------------------------------------------------------------------------------------------------------------------------------------------------|-----------|
|                                    | <p>Group allocation:<br/>Patients were randomly allocated to treatment and control groups.</p> <p>Follow-up period:<br/>60 days</p>                                            | <p><u>Group 1</u><br/>Number of patients: 936<br/>Female/male: 593/343<br/>Age (mean(sd)): 34.4 (10.4)</p> <p><u>Control group</u><br/>Number of patients: 966<br/>Female/male: 587/379<br/>Age (mean(sd)): 35.4 (11.0)</p> <p><u>Eligibility criteria:</u> Patients aged 18 years or older, with scheduled appointments during the study period, who could speak and read English. Patients were excluded if they required emergency medical conditions or obstetric care; or if they had been previously exposed to the study intervention.</p>                          | <p>facilities”</p> <p>Site affiliation: Military</p> <p>Number of practices or physicians: Not reported.</p> <p>Location: United States (Kentucky and Florida)</p>                         | <p>Intervention aim: Improve preventive care, improve care of chronic diseases<br/>QI agent: Medical clinics</p> <p><u>Group 1</u></p> <p>Clinician reminders: The Department of Defense Problem-Knowledge Couplers is a computerized decision support system. Couplers uses structured questions based on the patient’s chief complaint to elicit information from patients and providers. Patients were allocated 30 minutes to input their medical histories into the Coupler tool. Based on a proprietary database of medical knowledge, suggestions for patient care strategies are produced.</p> <p><u>Control group</u></p> <p>Usual care.</p>                                                                | <p><u>Pneumococcal</u><br/>Proportion of eligible patients receiving vaccination</p> <p>Odds ratio of receiving vaccination between treatment and control groups</p>       | <p><u>Pneumococcal</u><br/>Follow-up<br/>Group 1: 1/61 (2%)<br/>Control: 0/72 (0%)</p> <p>Follow-up<br/>OR = 0.00*<br/>P &lt; 0.001*</p> <p>* Generated by multi-level logistic regression. This value is not reliable due to the small number of events in the analysis.</p>                                                                                                                              | <p>setting did not substantially improve quality of care, decrease resource consumption, or improve satisfaction of patients or providers.</p>                                                                                                                                                 |           |
| <p>Armstrong et al. 1999 (213)</p> | <p>Design:<br/>CCT</p> <p>Group allocation:<br/>Experimental study with patients randomly allocated to treatment and control groups.</p> <p>Follow-up period:<br/>7 months</p> | <p>Number of patients: 740<br/>Female/male: 75%/25%<br/>Age (mean(sd)): 77 years (sd not reported)<br/>Group-specific covariate distributions not reported.</p> <p><u>Group 1</u><br/>Number of patients: 390*</p> <p><u>Control group</u><br/>Number of patients: 350*</p> <p><u>Eligibility criteria:</u><br/>Community dwelling residents aged 65 years or older who received care at the study primary care site in the previous year.</p> <p>* Numbers at randomization. Survey response rates for outcome and covariate measurement were &lt;60% in both groups.</p> | <p>Number of sites: 1 academic primary care site</p> <p>Site affiliation: University</p> <p>Number of practices or physicians: As above.</p> <p>Location: United States (Pennsylvania)</p> | <p><u>Mailed educational brochure vs mailed postcard reminders</u></p> <p>Intervention aim: Improve vaccination rates<br/>QI agent: Medical clinic</p> <p><u>Group 1</u></p> <p>Patient education / reminders: An educational brochure pitched at the 12<sup>th</sup> grade reading level, targeted against established reasons for vaccination refusal, and including information about Medicare coverage and local vaccination access, was mailed to patients.</p> <p><u>Control group</u></p> <p>Patient education / reminders: A simple post card reminding patients that influenza is a leading cause of morbidity and mortality among seniors and that it was time for vaccination was mailed to patients.</p> | <p><u>Influenza</u><br/>Proportion of eligible patients receiving vaccination</p> <p>Odds or risk ratios of receiving vaccination between treatment and control groups</p> | <p><u>Influenza</u><br/>Follow-up<br/>Overall<br/>Group 1: 152/229 (66%)<br/>Control: 115/202 (57%)</p> <p>Previously vaccinated patients<br/>Group 1: 75.3%<br/>Control: 70.9%</p> <p>Patients without previous vaccination<br/>Group 1: 20.0%<br/>Control: 9.3%</p> <p>Follow-up<br/>Overall<br/>OR = 1.49<br/>P = 0.04</p> <p>Previously vaccinated patients<br/>RR = 1.06<br/>95% CI = [.93, 1.21]</p> | <p>Patient information targeting common reasons for refusing influenza vaccination is more effective in convincing individuals to get vaccinated than a reminder alone.</p> <p>In the sub-group of patients who had previously not been vaccinated, the RR was 2.15 (95% CI [0.69, 6.58]).</p> | <p>19</p> |

Online Supplementary Data

http://www.annfammed.org/content/10/6/538/DC1

|                          |                                                                                                                                                                                                            |                                                                                                                                                                                                                                                                                                                                                                                                                                                                                                                  |                                                                                                                                                                            |                                                                                                                                                                                                                                                                                                                                                                                                                                                                                                                                                                                                                                                                                                                                                                                                                                                                                                                                                                                                                                    |                                                                                                                                                                                                                |                                                                                                                                                                                                                                                                                                                       |                                                                                                                                                                                                                                                                                                          |    |
|--------------------------|------------------------------------------------------------------------------------------------------------------------------------------------------------------------------------------------------------|------------------------------------------------------------------------------------------------------------------------------------------------------------------------------------------------------------------------------------------------------------------------------------------------------------------------------------------------------------------------------------------------------------------------------------------------------------------------------------------------------------------|----------------------------------------------------------------------------------------------------------------------------------------------------------------------------|------------------------------------------------------------------------------------------------------------------------------------------------------------------------------------------------------------------------------------------------------------------------------------------------------------------------------------------------------------------------------------------------------------------------------------------------------------------------------------------------------------------------------------------------------------------------------------------------------------------------------------------------------------------------------------------------------------------------------------------------------------------------------------------------------------------------------------------------------------------------------------------------------------------------------------------------------------------------------------------------------------------------------------|----------------------------------------------------------------------------------------------------------------------------------------------------------------------------------------------------------------|-----------------------------------------------------------------------------------------------------------------------------------------------------------------------------------------------------------------------------------------------------------------------------------------------------------------------|----------------------------------------------------------------------------------------------------------------------------------------------------------------------------------------------------------------------------------------------------------------------------------------------------------|----|
|                          |                                                                                                                                                                                                            |                                                                                                                                                                                                                                                                                                                                                                                                                                                                                                                  |                                                                                                                                                                            |                                                                                                                                                                                                                                                                                                                                                                                                                                                                                                                                                                                                                                                                                                                                                                                                                                                                                                                                                                                                                                    |                                                                                                                                                                                                                | <p>Patients without previous vaccination<br/>RR = 2.15<br/>95% CI = [0.69, 6.75]</p> <p><u>Pneumococcal</u><br/>Not targeted.</p>                                                                                                                                                                                     |                                                                                                                                                                                                                                                                                                          |    |
| Arthur et al. 2002 (214) | <p>Design:<br/>Cluster-RCT</p> <p>Group allocation:<br/>Experimental study with patients allocated to treatment and control groups by GP clusters and households</p> <p>Follow-up period:<br/>3 months</p> | <p>Number of patients: 2052<br/>Figures at analysis provided below.</p> <p><u>Group 1</u><br/>Number of patients: 680<br/>Female/male: 401/279<br/>Age (median (IQR)): 79 (77-83)</p> <p><u>Control group</u><br/>Number of patients: 1372<br/>Female/male: 847/525<br/>Age (median (IQR)): 79 (77-83)</p> <p><u>Eligibility criteria:</u><br/>Aged 75 years or over and registered with the study practice.</p> <p>Exclusions: Those living in residential care, nursing homes, or sheltered accommodation.</p> | <p>Number of sites: 1 community general practice</p> <p>Site affiliation: Private practice</p> <p>Number of practices or physicians: 1</p> <p>Location: United Kingdom</p> | <p><u>Influenza vaccination during a comprehensive health assessment offered in patients' homes vs invitation to receive vaccine at the clinic</u></p> <p>Intervention aim: Improve vaccination rates<br/>QI agent: Medical clinic</p> <p><u>Group 1</u><br/>Patient education / reminders: Patients received an offer of a home-visit over-75 health assessment, in which an influenza vaccination could be provided.</p> <p>Delivery site change: Community health nurses attended patients' homes to provide a nover-75 preventive care health assessment. After the assessment, patients were offered influenza vaccine.</p> <p>Team change: Nurses provided vaccination in patients' homes, after a comprehensive over-75 health assessment.</p> <p><u>Control group</u><br/>Patient education / reminders: A personal letter was sent to eligible patients inviting them to attend any of the influenza vaccination clinics held at the surgery. The letter stressed the importance and safety of influenza vaccination.</p> | <p><u>Influenza</u><br/>Proportion of eligible patients receiving vaccination</p> <p>Odds ratio of receiving vaccination between treatment and control groups</p> <p><u>Pneumococcal</u><br/>Not targeted.</p> | <p><u>Influenza</u><br/>Baseline<br/>Group 1: 331/680 (49%)<br/>Control: 641/1372 (47%)</p> <p>Follow-up – 3 months<br/>Group 1: 505/680 (74%)<br/>Control: 932/1372 (68%)</p> <p>Follow-up – 3 months<br/>OR = 1.36<br/>P = 0.003*</p> <p><u>Pneumococcal</u><br/>Not targeted.</p> <p>* Unit of analysis error.</p> | <p>Combining the offer of vaccination with a comprehensive health check, and providing both in patients' homes, produced a higher uptake of influenza vaccinations than personal invitation letters alone. The effect was especially marked in those who had not received vaccine the previous year.</p> | 23 |
| Baker et al. 1998 (215)  | Design:                                                                                                                                                                                                    | Number of patients: 24743                                                                                                                                                                                                                                                                                                                                                                                                                                                                                        | Number of sites: 1 large                                                                                                                                                   | Generic patient reminder postcards vs                                                                                                                                                                                                                                                                                                                                                                                                                                                                                                                                                                                                                                                                                                                                                                                                                                                                                                                                                                                              | Influenza                                                                                                                                                                                                      | Influenza                                                                                                                                                                                                                                                                                                             | Rates of vaccination increased                                                                                                                                                                                                                                                                           | 25 |

Online Supplementary Data

http://www.annfammed.org/content/10/6/538/DC1

|                                 |                                                                                                                                                         |                                                                                                                                                                                                                                                                                                                                                                                                                                                                                                                                                                                                                      |                                                                                                                                                                                    |                                                                                                                                                                                                                                                                                                                                                                                                                                                                                                                                                                                                                                                                                                                                                                                                                                                                                                                                                                                                                                                        |                                                                                                                                                                                                               |                                                                                                                                                                                                                                                                                                                                                                                                                                                                                                                                                                                                                  |                                                                                                                                                                                                                                                                                                                                                                                                                                     |           |
|---------------------------------|---------------------------------------------------------------------------------------------------------------------------------------------------------|----------------------------------------------------------------------------------------------------------------------------------------------------------------------------------------------------------------------------------------------------------------------------------------------------------------------------------------------------------------------------------------------------------------------------------------------------------------------------------------------------------------------------------------------------------------------------------------------------------------------|------------------------------------------------------------------------------------------------------------------------------------------------------------------------------------|--------------------------------------------------------------------------------------------------------------------------------------------------------------------------------------------------------------------------------------------------------------------------------------------------------------------------------------------------------------------------------------------------------------------------------------------------------------------------------------------------------------------------------------------------------------------------------------------------------------------------------------------------------------------------------------------------------------------------------------------------------------------------------------------------------------------------------------------------------------------------------------------------------------------------------------------------------------------------------------------------------------------------------------------------------|---------------------------------------------------------------------------------------------------------------------------------------------------------------------------------------------------------------|------------------------------------------------------------------------------------------------------------------------------------------------------------------------------------------------------------------------------------------------------------------------------------------------------------------------------------------------------------------------------------------------------------------------------------------------------------------------------------------------------------------------------------------------------------------------------------------------------------------|-------------------------------------------------------------------------------------------------------------------------------------------------------------------------------------------------------------------------------------------------------------------------------------------------------------------------------------------------------------------------------------------------------------------------------------|-----------|
|                                 | <p>CCT</p> <p>Group allocation: Experimental study, with patients allocated to treatment and control groups.</p> <p>Follow-up period: Not reported.</p> | <p><u>Group 1</u><br/>Number of patients: 6169<br/>Female/male: 3560/2609<br/>Age (mean(sd)): 67.3 (14.7)</p> <p><u>Group 2</u><br/>Number of patients: 6252<br/>Female/male: 3606/2645<br/>Age (mean(sd)): 67.4 (14.6)</p> <p><u>Group 3</u><br/>Number of patients: 6151<br/>Female/male: 3525/2626<br/>Age (mean(sd)): 66.8 (15.1)</p> <p><u>Control group</u><br/>Number of patients: 6171<br/>Female/male: 3592/2579<br/>Age (mean(sd)): 67.1 (14.6)</p> <p><u>Eligibility criteria:</u><br/>Adult patients aligned with a primary care physician; and age 65 years or older, or chronic disease diagnosis.</p> | <p>medical group serving a nonprofit HMO</p> <p>Site affiliation: Private MCO</p> <p>Number of practices or physicians: Not reported</p> <p>Location: United States (Michigan)</p> | <p><u>personalized reminder postcards vs personalized reminder letters vs usual care</u></p> <p>Intervention aim: Improve vaccination rates<br/>QI agent: Medical group</p> <p><u>Group 1 – Generic reminder postcards</u></p> <p>Patient education / reminders: Computer generated postcards were mailed to patients. Content was based on the Health Belief Model, and included a description of who is at risk, statement of the fact that influenza can be serious, and assurance that the vaccine is safe and effective.</p> <p><u>Group 2 – Personalized reminder postcards</u></p> <p>Patient education / reminders as above, except the postcard was addressed to the patient and from the primary care physician.</p> <p><u>Group 3 – Personalized reminder letters</u></p> <p>Patient education / reminders: A personalized letter containing a message tailored to the patient's risk factors for influenza, was sent from the primary care physician, addressed to the patient at risk.</p> <p><u>Control group</u></p> <p>Usual care.</p> | <p>Proportion of eligible patients receiving vaccination</p> <p>Risk difference and odds ratio of receiving vaccination between treatment and control groups</p> <p><u>Pneumococcal</u><br/>Not targeted.</p> | <p>Overall*<br/>Follow-up<br/>Group 1: 2684/6169 (44%)<br/>Group 2: 2795/6252 (45%)<br/>Group 3: 2780/6151 (45%)<br/>Control: 2505/6171 (41%)</p> <p>Overall*<br/>Follow-up<br/>Group 1<br/>RD = 3.01**<br/>95% CI = [1.22, 4.79]<br/>OR = 1.13<br/>P = 0.001</p> <p>Group 2<br/>RD = 4.20**<br/>95% CI = [2.43, 5.98]<br/>OR = 1.18<br/>P &lt; 0.001</p> <p>Group 3<br/>RD = 4.75**<br/>95% CI = [2.97, 6.53]<br/>OR = 1.21<br/>P &lt; 0.001</p> <p><u>Pneumococcal</u><br/>Not targeted.</p> <p>* Analyses were stratified by age 65 or older and chronic disease status. Results are available by strata.</p> | <p>with the intensity of the intervention. The reminder postcard from the primary care physician was more effective than the generic postcard. The personalized, tailored letter was more effective than either postcard intervention. Patients in the letter group were more likely to recall receiving a reminder.</p> <p>Cost savings due to improving vaccination rates were higher in the letter than the postcard groups.</p> |           |
| <p>Barnas et al. 1989 (216)</p> | <p>Design: CCT</p> <p>Group allocation: Patients were randomly allocated to treatment and control groups.</p> <p>Follow-up period:</p>                  | <p>Number of patients: 988 (840 patients available at analysis)<br/>Age (mean, range): 74 years, range [65, 96]<br/>Female/male: 70% / 30%</p> <p><u>Group 1</u><br/>Number of patients: 406</p>                                                                                                                                                                                                                                                                                                                                                                                                                     | <p>Number of sites: 1 adult primary care clinic</p> <p>Site affiliation: University</p> <p>Number of practices or physicians: Not reported.</p> <p>Location: United States</p>     | <p><u>Patient reminder postcards vs usual care</u></p> <p><u>Group 1</u></p> <p>Intervention aim: Improve vaccination rates<br/>QI agent: Medical clinics</p>                                                                                                                                                                                                                                                                                                                                                                                                                                                                                                                                                                                                                                                                                                                                                                                                                                                                                          | <p><u>Influenza</u><br/>Proportion of eligible patients receiving vaccination</p> <p>Odds ratio of receiving vaccination between treatment and control groups</p>                                             | <p><u>Influenza</u><br/>Follow-up<br/>Group 1: 101/406 (25%)<br/>Control: 137/434 (32%)</p> <p>Follow-up<br/>OR = 0.72<br/>P &lt; 0.02</p>                                                                                                                                                                                                                                                                                                                                                                                                                                                                       | <p>Results substantiate an apparent lack of benefit that postcard reminders have on influencing the elderly to receive influenza vaccine. In fact, postcard reminders appeared detrimental.</p>                                                                                                                                                                                                                                     | <p>19</p> |

Online Supplementary Data

http://www.annfammed.org/content/10/6/538/DC1

|                          |                                                                                                                                                                                                                                                                                                                                                          |                                                                                                                                                                                                                                                                                                                              |                                                                                                                                                                                                                             |                                                                                                                                                                                                                                                                                                                                                                                                                                                                                                                                                                                                                                                                                                                                                                                                                                                                                                                                                                                            |                                                                                                                                                                                                                                                                            |                                                                                                                                                                                                                                                                                                                                                                                                 |                                                                                                                                                                                                                                                                                                                                                                                                     |    |
|--------------------------|----------------------------------------------------------------------------------------------------------------------------------------------------------------------------------------------------------------------------------------------------------------------------------------------------------------------------------------------------------|------------------------------------------------------------------------------------------------------------------------------------------------------------------------------------------------------------------------------------------------------------------------------------------------------------------------------|-----------------------------------------------------------------------------------------------------------------------------------------------------------------------------------------------------------------------------|--------------------------------------------------------------------------------------------------------------------------------------------------------------------------------------------------------------------------------------------------------------------------------------------------------------------------------------------------------------------------------------------------------------------------------------------------------------------------------------------------------------------------------------------------------------------------------------------------------------------------------------------------------------------------------------------------------------------------------------------------------------------------------------------------------------------------------------------------------------------------------------------------------------------------------------------------------------------------------------------|----------------------------------------------------------------------------------------------------------------------------------------------------------------------------------------------------------------------------------------------------------------------------|-------------------------------------------------------------------------------------------------------------------------------------------------------------------------------------------------------------------------------------------------------------------------------------------------------------------------------------------------------------------------------------------------|-----------------------------------------------------------------------------------------------------------------------------------------------------------------------------------------------------------------------------------------------------------------------------------------------------------------------------------------------------------------------------------------------------|----|
|                          | 1 influenza season                                                                                                                                                                                                                                                                                                                                       | <p><u>Control group</u><br/>Number of patients: 434</p> <p><u>Eligibility criteria:</u> Patients aged 65 years or older scheduled to attend the study site during fall of 1986.</p>                                                                                                                                          | (Wisconsin)                                                                                                                                                                                                                 | <p>Patient education / reminders: Patients received an additional message on their routine pre-appointment postcard reminders, mailed a week before the scheduled visit. The message prompted patients to ask their physicians for a flu shot.</p> <p><u>Control group</u><br/>Usual care.</p>                                                                                                                                                                                                                                                                                                                                                                                                                                                                                                                                                                                                                                                                                             | <p><u>Pneumococcal</u><br/>Not targeted.</p>                                                                                                                                                                                                                               | <p><u>Pneumococcal</u><br/>Not targeted.</p>                                                                                                                                                                                                                                                                                                                                                    |                                                                                                                                                                                                                                                                                                                                                                                                     |    |
| Barton et al. 1990 (217) | <p>Design: RCS</p> <p>Group allocation: Patients on a reminder list were compared to patients not on the list. Reasons for not appear on the list included joining the HMO after the list had been composed, having no HMO visit during the period of list formation, or a very recent diagnosis of type I diabetes.</p> <p>Follow-up period: 1 year</p> | <p>Number of patients: 254</p> <p><u>Group 1</u><br/>Number of patients: 143<br/>Age (mean(sd)): 53.4 (0.7)</p> <p><u>Control group</u><br/>Number of patients: 111<br/>Age (mean(sd)): 54.5 (0.5)</p> <p><u>Eligibility criteria:</u> Patients between the ages of 40 and 65, with insulin-dependent diabetes mellitus.</p> | <p>Number of sites: 1 large HMO</p> <p>Site affiliation: Private MCO</p> <p>Number of practices or physicians: Approximately 100 general internists at 7 health centers.</p> <p>Location: United States (Massachusetts)</p> | <p><u>Computer generated reminders and peer comparison feedback vs no intervention</u></p> <p>Intervention aim: Improve vaccination rates<br/>QI agent: Private MCO</p> <p><u>Group 1</u></p> <p>Patient education / reminders: Post card reminders were sent to HMO members. Educational materials (e.g.: posters for waiting areas and examination rooms, pharmacy bag notices) were also produced.</p> <p>Clinician reminders: A reminder message was displayed at the front of the summary of the computerized record prepared for each scheduled primary care visit. Paper chart reminders were also implemented.</p> <p>Audit and feedback: Performance was fed back to service chiefs and to individual physicians. Physicians periodically received lists of patients who had not yet been vaccinated.</p> <p><u>Control group</u></p> <p>Control patients did not receive reminder postcards, and were not on lists for generating clinician reminders or audit and feedback.</p> | <p><u>Influenza</u><br/>Proportion of eligible patients receiving vaccination</p> <p>Risk difference between treatment and control groups</p> <p>Odds ratio of receiving vaccination between treatment and control groups</p> <p><u>Pneumococcal</u><br/>Not targeted.</p> | <p><u>Influenza</u><br/>Follow-up*<br/>Group 1: 80/143 (56%)<br/>Control: 30/111 (27%)</p> <p>Follow-up<br/>Difference = 28%<br/>(5% CI = [16%, 40%])</p> <p>Follow-up<br/>OR = 3.43<br/>P &lt; 0.001</p> <p><u>Pneumococcal</u><br/>Not targeted.</p> <p>* The denominator of this outcome includes a small number of patients (&lt;5%) for whom vaccination was not indicated or refused.</p> | <p>A patient and provider oriented reminder system appeared to improve influenza vaccination rates among non-elderly diabetic patients.</p> <p>Reasons for patients being allocated to the no-intervention comparison group were related to lower visit rates the year before. Patients with fewer visits were less likely to be vaccinated, raising a risk of selection bias in these results.</p> | 19 |
| Beck et al. 1997 (218)   | Design:                                                                                                                                                                                                                                                                                                                                                  | Number of patients: 321                                                                                                                                                                                                                                                                                                      | Number of sites: 1 group                                                                                                                                                                                                    | Group visits with a multidisciplinary                                                                                                                                                                                                                                                                                                                                                                                                                                                                                                                                                                                                                                                                                                                                                                                                                                                                                                                                                      | Influenza                                                                                                                                                                                                                                                                  | Influenza                                                                                                                                                                                                                                                                                                                                                                                       | A group visit intervention led to                                                                                                                                                                                                                                                                                                                                                                   | 21 |

Online Supplementary Data

http://www.annfammed.org/content/10/6/538/DC1

|                          |                                                                                                                                                          |                                                                                                                                                                                                                                                                                                                                                                                |                                                                                                                                                                                                     |                                                                                                                                                                                                                                                                                                                                                                                                                                                                                                                                                                                                                                                                                                                                                                                                                                                                                               |                                                                                                                                                                                                                                                            |                                                                                                                                                                                                                                                                                                                                                                                                                                                                                                                                                                                         |                                                                                                                                                                                                                                                                                                                                                                                                                                                      |    |
|--------------------------|----------------------------------------------------------------------------------------------------------------------------------------------------------|--------------------------------------------------------------------------------------------------------------------------------------------------------------------------------------------------------------------------------------------------------------------------------------------------------------------------------------------------------------------------------|-----------------------------------------------------------------------------------------------------------------------------------------------------------------------------------------------------|-----------------------------------------------------------------------------------------------------------------------------------------------------------------------------------------------------------------------------------------------------------------------------------------------------------------------------------------------------------------------------------------------------------------------------------------------------------------------------------------------------------------------------------------------------------------------------------------------------------------------------------------------------------------------------------------------------------------------------------------------------------------------------------------------------------------------------------------------------------------------------------------------|------------------------------------------------------------------------------------------------------------------------------------------------------------------------------------------------------------------------------------------------------------|-----------------------------------------------------------------------------------------------------------------------------------------------------------------------------------------------------------------------------------------------------------------------------------------------------------------------------------------------------------------------------------------------------------------------------------------------------------------------------------------------------------------------------------------------------------------------------------------|------------------------------------------------------------------------------------------------------------------------------------------------------------------------------------------------------------------------------------------------------------------------------------------------------------------------------------------------------------------------------------------------------------------------------------------------------|----|
|                          | <p>CCT</p> <p>Group allocation: Experimental study with patients allocated randomly to treatment and control groups.</p> <p>Follow-up period: 1 year</p> | <p><u>Group 1</u><br/>Number of patients: 160<br/>Female/male: 110/50<br/>Age (mean(sd)): 72 (sd not reported)</p> <p><u>Control group</u><br/>Number of patients: 161<br/>Female/male: 103/58<br/>Age (mean(sd)): 75 (sd not reported)</p> <p><u>Eligibility criteria:</u><br/>Patients aged 65 years or older, with a chronic disease (heart, lung, joint, or diabetes).</p> | <p>medical practice at a group model HMO</p> <p>Site affiliation: Private MCO</p> <p>Number of practices or physicians: As above.</p> <p>Location: United States (Colorado)</p>                     | <p><u>care team vs usual care</u></p> <p>Intervention aim: Improve preventive care<br/>QI agent: Medical clinic</p> <p><u>Group 1</u></p> <p>Visit structure change: Patients were able to attend monthly group visits. The visit format consisted of a 15 minute socialization period; a 30 minute presentation on specific health-related topics, included medication management, exercise, nutrition, etc.; a 15 minute break; a 15 minute question and answer period; 15 minutes for planning the next group visit; and 30 minutes for informal one-to-one interactions with the physician.</p> <p>Team change: The health care team was introduced at the first group visit. Pharmacists, dieticians, skilled nursing personnel, and a clinical psychologist were involved in facilitating and providing content for the group visits.</p> <p><u>Control group</u></p> <p>Usual care</p> | <p>Proportion of eligible patients receiving vaccination</p> <p>Odds ratio of receiving vaccination between treatment and control groups</p> <p><u>Pneumococcal</u><br/>Proportion of eligible patients receiving vaccination (period of surveillance)</p> | <p>Baseline<br/>Group 1: 118/160 (74%)<br/>Control: 116/161 (72%)</p> <p>Follow-up<br/>Group 1: 130/160 (81%)*<br/>Control: 103/161 (64%)*</p> <p>Follow-up<br/>OR = 2.44<br/>P &lt; 0.001</p> <p><u>Pneumococcal</u><br/>Baseline<br/>Group 1: 21/160 (13%)<br/>Control: 23/161 (14%)</p> <p>Follow-up<br/>Group 1: 53/160 (33%)*<br/>Control: 29/161 (18%)*</p> <p>Follow-up<br/>RR = 1.83<br/>OR = 2.25<br/>P &lt; 0.001</p> <p>* LTFU was 21/160 and 48/161 in the intervention and control groups, respectively. Differential LTFU may have resulted in bias in these results.</p> | <p>increased influenza and pneumococcal vaccination rates compared to a non-intervention control group.</p> <p>Group visits with a multidisciplinary care team were associated with reduced use of ambulatory services such as acute and specialist visits, fewer emergency care center visits, and fewer repeat hospitalizations.</p> <p>Costs to the healthcare system were \$14.70 more per patient in intervention than in control patients.</p> |    |
| Becker et al. 1989 (219) | <p>Design: CCT</p> <p>Group allocation: Patients were randomly allocated to treatment and control groups.</p> <p>Follow-up period: 4 months</p>          | <p>Number of patients: 1055 (563 patients available at analysis, enumerated below.)</p> <p><u>Group 1</u><br/>Number of patients: 168<br/>Female/male: 114/54<br/>Age (mean(sd)): 50.7 (5.9)</p> <p><u>Group 2</u><br/>Number of patients: 203<br/>Female/male: 146/57<br/>Age (mean(sd)): 51.9 (5.9)</p> <p><u>Control group</u></p>                                          | <p>Number of sites: 1 university internal medicine clinic</p> <p>Site affiliation: University</p> <p>Number of practices or physicians: Not reported.</p> <p>Location: United States (Virginia)</p> | <p><u>Patient and clinician preventive care reminders vs clinician preventive care reminders vs usual care</u></p> <p>Intervention aim: Improve preventive care<br/>QI agent: Medical clinics</p> <p><u>Group 1</u></p> <p>Patient education / reminders: Patients were mailed an individualized schedule for preventive care needs. The reminders were generated from a standardized telephone questionnaire and from patient</p>                                                                                                                                                                                                                                                                                                                                                                                                                                                            | <p><u>Influenza</u><br/>Proportion of eligible patients receiving vaccination</p> <p>Odds ratio of receiving vaccination between treatment and control groups</p>                                                                                          | <p><u>Influenza</u><br/>Follow-up<br/>Group 1: 12/48 (25%)<br/>Group 2: 8/45 (18%)<br/>Control: 5/56 (9%)<br/>Overall p-value = 0.177</p> <p>Follow-up<br/>Group 1<br/>OR = 3.40<br/>P = 0.03*<br/>Group 2<br/>OR = 2.21<br/>P = 0.24*</p>                                                                                                                                                                                                                                                                                                                                              | <p>Patient and clinician reminders did not produce a significantly different improvement in vaccination rates, but this may be due to small sample sizes.</p> <p>The interventions – especially the additional patient reminder intervention – improved the proportion of patients receiving all recommended services.</p>                                                                                                                           | 19 |

Online Supplementary Data

http://www.annfammed.org/content/10/6/538/DC1

|                           |                                                                                                                                       |                                                                                                                                                                                                                                                                                                                                                                                                                                                                                                                                                                                                                                |                                                                                                                                                                                                                                                                                                                                                        |                                                                                                                                                                                                                                                                                                                                                                                                                                                                                                                                                                                                                                                                                                                                                                                                         |                                                                                                                                                                      |                                                                                                                                                                                                                                                                                                                                                                                                                                                                                                                 |                                                                                                                                                                                                                                                                                                                                                                                                                                                                                                                                                                                                                                                                                                                                                                                                     |    |
|---------------------------|---------------------------------------------------------------------------------------------------------------------------------------|--------------------------------------------------------------------------------------------------------------------------------------------------------------------------------------------------------------------------------------------------------------------------------------------------------------------------------------------------------------------------------------------------------------------------------------------------------------------------------------------------------------------------------------------------------------------------------------------------------------------------------|--------------------------------------------------------------------------------------------------------------------------------------------------------------------------------------------------------------------------------------------------------------------------------------------------------------------------------------------------------|---------------------------------------------------------------------------------------------------------------------------------------------------------------------------------------------------------------------------------------------------------------------------------------------------------------------------------------------------------------------------------------------------------------------------------------------------------------------------------------------------------------------------------------------------------------------------------------------------------------------------------------------------------------------------------------------------------------------------------------------------------------------------------------------------------|----------------------------------------------------------------------------------------------------------------------------------------------------------------------|-----------------------------------------------------------------------------------------------------------------------------------------------------------------------------------------------------------------------------------------------------------------------------------------------------------------------------------------------------------------------------------------------------------------------------------------------------------------------------------------------------------------|-----------------------------------------------------------------------------------------------------------------------------------------------------------------------------------------------------------------------------------------------------------------------------------------------------------------------------------------------------------------------------------------------------------------------------------------------------------------------------------------------------------------------------------------------------------------------------------------------------------------------------------------------------------------------------------------------------------------------------------------------------------------------------------------------------|----|
|                           |                                                                                                                                       | <p>Number of patients: 192<br/>Female/male: 123/69<br/>Age (mean(sd)): 51.3 (5.7)</p> <p><u>Eligibility criteria:</u> Patients were aged 40-60 years or age, had a recorded telephone number and at least one visit within 18 months at the study clinic, and had a house officer or general medicine fellow assigned as a primary physician.</p> <p><u>Exclusions:</u> Nursing home or long-term psychiatric facility</p>                                                                                                                                                                                                     |                                                                                                                                                                                                                                                                                                                                                        | <p>chart review.</p> <p>Clinician reminders: Clinicians received an individualized schedule for each patient's preventive care needs, as memoranda appended to each patient's chart on the first clinic visit after the enrollment interview.</p> <p><u>Group 2</u></p> <p>Clinician reminders: Clinicians received an individualized schedule for each patient's preventive care needs, as memoranda appended to each patient's chart on the first clinic visit after the enrollment interview.</p> <p><u>Control group</u><br/>Usual care.</p>                                                                                                                                                                                                                                                        | <p><u>Pneumococcal</u><br/>Proportion of eligible patients receiving vaccination</p> <p>Odds ratio of receiving vaccination between treatment and control groups</p> | <p><u>Pneumococcal</u><br/>Follow-up<br/>Group 1: 2/26 (8%)<br/>Group 2: 2/34 (9%)<br/>Control: 2/29 (7%)<br/>Overall p-value = 0.966</p> <p>Follow-up<br/>Group 1<br/>OR = 1.13<br/>P = 1.00*<br/>Group 2<br/>OR = 0.84<br/>P = 1.00*</p> <p>* Authors do not report p-values. These values have been calculated by present reviewers.</p>                                                                                                                                                                     |                                                                                                                                                                                                                                                                                                                                                                                                                                                                                                                                                                                                                                                                                                                                                                                                     |    |
| Belcher et al. 1990 (220) | <p>Design: CCT</p> <p>Group allocation: Randomized allocation of patients to treatment groups.</p> <p>Follow-up period: 4.5 years</p> | <p>Number of patients: 1224*<br/>Gender distributions not reported.</p> <p><u>Group 1</u><br/>Number of patients: 277<br/>Age (mean): 57</p> <p><u>Group 2</u><br/>Number of patients: 273<br/>Age (mean): 57</p> <p><u>Group 3</u><br/>Number of patients: 400<br/>Age (mean): 57</p> <p><u>Control group</u><br/>Number of patients: 274<br/>Age (mean): 58</p> <p><u>Eligibility criteria:</u> Patients attending any of the study site outpatient clinics during October-December 1980, who resided in the site's service area and had a medical problem diagnosed during their period of active military service. All</p> | <p>Number of sites: 1 VA medical center</p> <p>Site affiliation: Veterans Affairs</p> <p>Number of practices or physicians: Clinics comprising the entire outpatient department of the medical centre, including sub-specialty medical, psychiatric, and surgical clinics in addition to primary care.</p> <p>Location: United States (Washington)</p> | <p><u>Clinician-focused QI vs patient-focused QI vs dedicated health promotion clinic (HPC) vs usual care</u></p> <p>Intervention aim: Improve preventive care<br/>QI agent: Medical center</p> <p><u>Group 1 – Clinician-focused QI</u></p> <p>Clinician reminders: A preventive care checklist was affixed to patient charts, for physician use.</p> <p>Clinician education: Physicians received a training session on preventive care.</p> <p>Audit and feedback: As a group, physicians received annual feedback about audit results.</p> <p><u>Group 2 – Patient-focused QI</u></p> <p>Patient education / reminders: Patients were mailed an annual packet containing a preventive care information brochure. Patients also received a wallet-sized, patient held preventive care record with</p> | <p><u>Influenza</u><br/>Proportion of eligible patients receiving vaccination</p>                                                                                    | <p><u>Influenza</u><br/>Baseline (1978-1981)<br/>Group 1: 15%<br/>Group 2: 15%<br/>Group 3: 16%<br/>Control: 16%</p> <p>Follow-up (1981-1982)<br/>Group 1: 29%<br/>Group 2: 29%<br/>Group 3: 54%*<br/>Control: 29%</p> <p>Follow-up (1982-1983)<br/>Group 1: 46%*<br/>Group 2: 42%*<br/>Group 3: 61%*<br/>Control: 33%*</p> <p>Follow-up (1983-1984)<br/>Groups 1 and 2: 52%*<br/>Group 3: 47%*<br/>Control: 45%*</p> <p>Follow-up (1984-1985)<br/>Groups 1 and 2: 63%*<br/>Group 3: 56%*<br/>Control: 67%*</p> | <p>All groups experienced an increase in influenza vaccination rates, likely due to independent outpatient vaccination campaigns conducted each fall starting in 1981.</p> <p>The clinician-oriented program did not appear to improve vaccinations compared with other interventions. This may have been due to low physician participation. Only 13% of flow sheets showed entries about preventive care parameters, and study investigators had difficulty convincing physicians at specialty clinics to allocate staff meeting time to audit and feedback.</p> <p>The patient-oriented materials also did not improve preventive care. Authors suggested that patient prompting may not have been enough to overcome inertia in physician practices.</p> <p>The HPC was successful for most</p> | 21 |

Online Supplementary Data

http://www.annfammed.org/content/10/6/538/DC1

|                        |                                                                                                                                                                                                                                       |                                                                                                                                                                                                                                                                                                                                                                                                                                                                                                                                                                                          |                                                                                                                                                                                                                                         |                                                                                                                                                                                                                                                                                                                                                                                                                                                                                                                                                                                                                                                                         |                                                                                                                                                                                                                                                                                                                                        |                                                                                                                                                                                                                                                                                                                                                                                                                                 |                                                                                                                                                                                                                                                                                                                                                                                                                                                                                                                                                      |    |
|------------------------|---------------------------------------------------------------------------------------------------------------------------------------------------------------------------------------------------------------------------------------|------------------------------------------------------------------------------------------------------------------------------------------------------------------------------------------------------------------------------------------------------------------------------------------------------------------------------------------------------------------------------------------------------------------------------------------------------------------------------------------------------------------------------------------------------------------------------------------|-----------------------------------------------------------------------------------------------------------------------------------------------------------------------------------------------------------------------------------------|-------------------------------------------------------------------------------------------------------------------------------------------------------------------------------------------------------------------------------------------------------------------------------------------------------------------------------------------------------------------------------------------------------------------------------------------------------------------------------------------------------------------------------------------------------------------------------------------------------------------------------------------------------------------------|----------------------------------------------------------------------------------------------------------------------------------------------------------------------------------------------------------------------------------------------------------------------------------------------------------------------------------------|---------------------------------------------------------------------------------------------------------------------------------------------------------------------------------------------------------------------------------------------------------------------------------------------------------------------------------------------------------------------------------------------------------------------------------|------------------------------------------------------------------------------------------------------------------------------------------------------------------------------------------------------------------------------------------------------------------------------------------------------------------------------------------------------------------------------------------------------------------------------------------------------------------------------------------------------------------------------------------------------|----|
|                        |                                                                                                                                                                                                                                       | <p>patients were male. Settings in which patients were treated include specialty medical, psychological, and surgical outpatient clinics as well as primary care clinics. Female patients were excluded.</p> <p>* Study featured before and after cross-sectional samples of patients. Patients in the “before” sample enumerated here.</p>                                                                                                                                                                                                                                              |                                                                                                                                                                                                                                         | <p>a list of preventive care activities. Mail-outs were repeated annually.</p> <p><u>Group 3 – HPC</u></p> <p>Case management: A separate Health Promotion Clinic (HPC) was devoted entirely to screening, health counseling, and coordinating follow-up care. Patients were mailed an invitation to self-refer to the HPC.</p> <p>Team change: Nurse practitioners were delivered preventive care independently, according to tailored protocols.</p> <p><u>Control group</u></p> <p>Usual care</p>                                                                                                                                                                    | <p>Odds ratio of receiving vaccination between treatment and control groups</p> <p><u>Pneumococcal</u><br/>Not targeted.</p>                                                                                                                                                                                                           | <p>Follow-up (1981-1982)**<br/>Group 1 OR = 1.00<br/>Group 2 OR = 1.00<br/>Group 3 OR = 2.86</p> <p>Follow-up (1982-1983)**<br/>Group 1 OR = 1.74<br/>Group 2 OR = 1.48<br/>Group 3 OR = 3.19</p> <p><u>Pneumococcal</u><br/>Not targeted.</p> <p>* Reported as being significantly different from baseline proportion (p &lt; 0.05).<br/>** Odds ratios calculated for years in which loss-to-follow-up was less than 20%.</p> | <p>preventive care processes, and showed early improvements in influenza vaccination rates compared with other interventions. Factors for success were high initial and long-term patient volunteerism rates.</p> <p>This study may have biased against the success of clinician-oriented or patient-oriented approaches by evaluating interventions in non-primary care settings, where clinicians are less receptive to preventive care. Additionally, the background vaccination campaigns may have masked intervention-induced improvements.</p> |    |
| Berg et al. 2005 (221) | <p>Design:<br/>RCS</p> <p>Group allocation:<br/>Observational study with patients allocated to treatment and control groups by randomly selecting matched patients from geographic regions.</p> <p>Follow-up period:<br/>5 months</p> | <p>Number of patients: 554</p> <p><u>Group 1</u><br/>Number of patients: 277<br/>Female/male: 132/145<br/>Age (percent over 65): 21%</p> <p><u>Control group</u><br/>Number of patients: 277<br/>Female/male: 138/139<br/>Age (percent over 65): 22%</p> <p><u>Eligibility criteria:</u><br/>Heart failure patients continuously enrolled 12 months prior to and 12 months after the study intervention in a large MCO (Blue Cross).</p> <p><u>Exclusion:</u> Patients in a skilled nursing facility, hospice claim, end-stage renal disease, dialysis, transplants, AIDS, or cancer</p> | <p>Number of sites: 1 heart disease management program at a Blue Cross / Blue Shield plan operating across two states</p> <p>Number of practices or physicians: Not reported</p> <p>Location: United States (Maryland and Virginia)</p> | <p><u>Multi-component disease management program vs usual care</u></p> <p>Intervention aim: Improve heart failure care<br/>QI agent: Commercial third party</p> <p><u>Group 1</u></p> <p>Patient education / reminders: A disease management plan was implemented, including formal scheduled nurse education sessions; 24 hour access to a nurse counseling and symptom advice telephone line; printed action plans, workbooks, and individualized assessment letters; medication compliance reminders; and vaccination reminders.</p> <p>Clinician reminders: Physicians were provided with reminders about treatment gaps and alerts for disease decompensation.</p> | <p><u>Influenza</u><br/>Proportion of eligible patients receiving vaccination</p> <p>Odds ratio of receiving vaccination between treatment and control groups</p> <p><u>Pneumococcal</u><br/>Proportion of eligible patients receiving vaccination</p> <p>Odds ratio of receiving vaccination between treatment and control groups</p> | <p><u>Influenza</u><br/>Baseline<br/>Group 1: 27%<br/>Control: 27%</p> <p>Follow-up<br/>Group 1: 33%<br/>Control: 31%</p> <p>Follow-up<br/>OR = 1.10*<br/>P = 0.584**</p> <p><u>Pneumococcal</u><br/>Baseline<br/>Group 1: 3%<br/>Control: 2%</p> <p>Follow-up (Cumulative)<br/>Group 1: 15%<br/>Control: 9%</p> <p>Follow-up<br/>OR = 1.78*<br/>P = 0.014**</p>                                                                | <p>This community-based, retrospective cohort study of a commercial heart failure disease management intervention demonstrated significant reductions in inpatient admissions.</p> <p>Significant differences in pneumococcal vaccination rates were detected.</p> <p>* Not reported by study authors. The value presented here was calculated by present reviewers.</p>                                                                                                                                                                             | 22 |



Online Supplementary Data

http://www.annfammed.org/content/10/6/538/DC1

|                        |                                                                                                                                                                                         |                                                                                                                                                                                                                                                                                                                                                                                                                                                                                                              |                                                                                                                                                                                                                                        |                                                                                                                                                                                                                                                                                                                                                                                                                                                                                                                                                                                                                                                                                                                                                                                                                                                                                                                                                                                                                                                             |                                                                                                                                                                                                                                                                                                                                       |                                                                                                                                                                                                                                                                                                                                                                                                       |                                                                                                                                                                                                                                                                                                                                                                                                                                                                                                                                      |    |
|------------------------|-----------------------------------------------------------------------------------------------------------------------------------------------------------------------------------------|--------------------------------------------------------------------------------------------------------------------------------------------------------------------------------------------------------------------------------------------------------------------------------------------------------------------------------------------------------------------------------------------------------------------------------------------------------------------------------------------------------------|----------------------------------------------------------------------------------------------------------------------------------------------------------------------------------------------------------------------------------------|-------------------------------------------------------------------------------------------------------------------------------------------------------------------------------------------------------------------------------------------------------------------------------------------------------------------------------------------------------------------------------------------------------------------------------------------------------------------------------------------------------------------------------------------------------------------------------------------------------------------------------------------------------------------------------------------------------------------------------------------------------------------------------------------------------------------------------------------------------------------------------------------------------------------------------------------------------------------------------------------------------------------------------------------------------------|---------------------------------------------------------------------------------------------------------------------------------------------------------------------------------------------------------------------------------------------------------------------------------------------------------------------------------------|-------------------------------------------------------------------------------------------------------------------------------------------------------------------------------------------------------------------------------------------------------------------------------------------------------------------------------------------------------------------------------------------------------|--------------------------------------------------------------------------------------------------------------------------------------------------------------------------------------------------------------------------------------------------------------------------------------------------------------------------------------------------------------------------------------------------------------------------------------------------------------------------------------------------------------------------------------|----|
|                        |                                                                                                                                                                                         |                                                                                                                                                                                                                                                                                                                                                                                                                                                                                                              |                                                                                                                                                                                                                                        | <p>Team change: A disease management nurse called patients regularly and facilitated information relay between the disease management program and each patient's physicians.</p> <p><u>Control group</u></p> <p>Usual care.</p>                                                                                                                                                                                                                                                                                                                                                                                                                                                                                                                                                                                                                                                                                                                                                                                                                             |                                                                                                                                                                                                                                                                                                                                       |                                                                                                                                                                                                                                                                                                                                                                                                       | <p>** Adjusted for previous vaccinations, demographics, comorbidities, previous medical service utilization, prescription drug history, and previous medical procedure utilization by logistic regression with matching on propensity scores.</p>                                                                                                                                                                                                                                                                                    |    |
| Berg et al. 2008 (222) | <p>Design:<br/>Cluster RCT</p> <p>Group allocation:<br/>Experimental study with households randomly allocated to treatment or control groups.</p> <p>Follow-up period:<br/>5 months</p> | <p>Number of patients: 134791</p> <p><u>Group 1</u><br/>Number of patients: 26474<br/>Female/male: 15779/10695<br/>Age (mean(sd)): 77.8 (7.5)</p> <p><u>Group 2</u><br/>Number of patients: 26864<br/>Female/male: 16118/10746<br/>Age (mean(sd)): 77.8 (7.5)</p> <p><u>Control group</u><br/>Number of patients: 81453<br/>Female/male: 48546/32907<br/>Age (mean(sd)): 77.7 (7.5)</p> <p><u>Eligibility criteria:</u><br/>All subscribers and their dependents in a large HMO, aged 65 years or older.</p> | <p>Number of sites: 1 large HMO</p> <p>Site affiliation: Private MCO</p> <p>Number of practices or physicians: Not reported</p> <p>Location: United States (Oklahoma, Rhode Island, Kentucky, California, Arizona, Utah, Colorado)</p> | <p><u>Patient vaccination reminder mailing vs vaccination and nursing advice telephone line reminder mailing vs usual care</u></p> <p>Intervention aim: Improve vaccination rates<br/>QI agent: Private MCO</p> <p><u>Group 1</u><br/>Patient education / reminders: Patients received an information mailing containing a description of high-risk populations and the benefits of vaccination, the recommended timing for vaccination, and a recommendation for frequent hand washing.</p> <p><u>Group 2</u><br/>Patient education / reminders: Patients received a mailing with a description of influenza symptoms and a brief description of high-risk populations. The mailing included an invitation to call a nurse advice service.</p> <p>Team change: 24/7 access to nursing advice was implemented through a community telephone service. All patients could call the nursing advice line, but only Group 2 patients received advice line reminders alongside influenza educational materials.</p> <p><u>Control group</u></p> <p>Usual care</p> | <p><u>Influenza</u><br/>Number of patients receiving vaccine per 10000 eligible patients</p> <p>Percent difference in number of patients receiving vaccine in a treatment group vs the control group</p> <p>Odds ratio of receiving vaccination between treatment and control groups</p> <p><u>Pneumococcal</u><br/>Not targeted.</p> | <p><u>Influenza</u><br/>Follow-up<br/>Group 1: 2074.11 (5491/26474)<br/>Group 2: 2018.69 (5423/26864)<br/>Control: 2076.83 (16916/81453)</p> <p>Follow-up<br/>Group 1:<br/>d = -0.10%<br/>P = 0.946</p> <p>Group 2<br/>d = -2.77%<br/>P = 0.069</p> <p>Follow-up<br/>Group 1:<br/>OR = 0.998<br/>P = 0.93</p> <p>Group 2<br/>OR = 0.965<br/>P = 0.04</p> <p><u>Pneumococcal</u><br/>Not targeted.</p> | <p>The mail delivered prompt deployed did not have a demonstrable effect on influenza vaccination rates. It did, however, show effects on health services utilization rates and cost savings.</p> <p>Lack of demonstrable effect on influenza vaccination rates may be due to the limited reliability of administrative data for influenza vaccination.</p> <p>The authors calculated a net savings of \$1.43-\$3.68 and \$10.94-\$13.84 per patient for the influenza mailing and the nurse advice interventions, respectively.</p> | 23 |

Online Supplementary Data

http://www.annfammed.org/content/10/6/538/DC1

|                                    |                                                                                                                                                                                   |                                                                                                                                                                                                                                                                                                                                                                                                                                                                                                                               |                                                                                                                                                                                               |                                                                                                                                                                                                                                                                                                                                                                                                                                                                                                                                                                                                      |                                                                                                                                                                                                                                                                                            |                                                                                                                                                                                                                                                                                                                                              |                                                                                                                                                                                                                                                                                                                                                       |           |
|------------------------------------|-----------------------------------------------------------------------------------------------------------------------------------------------------------------------------------|-------------------------------------------------------------------------------------------------------------------------------------------------------------------------------------------------------------------------------------------------------------------------------------------------------------------------------------------------------------------------------------------------------------------------------------------------------------------------------------------------------------------------------|-----------------------------------------------------------------------------------------------------------------------------------------------------------------------------------------------|------------------------------------------------------------------------------------------------------------------------------------------------------------------------------------------------------------------------------------------------------------------------------------------------------------------------------------------------------------------------------------------------------------------------------------------------------------------------------------------------------------------------------------------------------------------------------------------------------|--------------------------------------------------------------------------------------------------------------------------------------------------------------------------------------------------------------------------------------------------------------------------------------------|----------------------------------------------------------------------------------------------------------------------------------------------------------------------------------------------------------------------------------------------------------------------------------------------------------------------------------------------|-------------------------------------------------------------------------------------------------------------------------------------------------------------------------------------------------------------------------------------------------------------------------------------------------------------------------------------------------------|-----------|
| <p>Black et al. (1993) (223)</p>   | <p>Design:<br/>CCT</p> <p>Group allocation:<br/>Experimental study with random allocation of patients to treatment and control groups.</p> <p>Follow-up period:<br/>16 months</p> | <p>Number of patients: 359</p> <p><u>Group 1</u><br/>Number of patients: 204<br/>Female/male: 145/59<br/>Age (mean(sd)): 77.6(8.4)</p> <p><u>Control group</u><br/>Number of patients: 155<br/>Female/male: 97/58<br/>Age (mean(sd)): 77.8(6.5)</p> <p><u>Eligibility criteria:</u><br/>Public health clients aged &gt;65 years not already vaccinated for influenza. Patients with cognitive impairment, and patients who were considered “inactive” to the public health clinic were excluded.</p>                          | <p>Number of sites: 1 public health clinic</p> <p>Site affiliation: Public health clinic</p> <p>Number of practices or physicians: N/a</p> <p>Location: Canada (Ontario)</p>                  | <p><u>Home visit with influenza vaccination education vs usual home visit</u></p> <p>Intervention aim: Improve vaccination rates<br/>QI agent: Public health clinic</p> <p><u>Group 1</u></p> <p>Team change: Public health nurses making routine home visits provided influenza vaccination education.</p> <p>Patient education: Public health nurses reviewed influenza, its vaccine, and strategies to overcome immunization barriers.</p> <p><u>Control group</u></p> <p>Usual care: Public health nurses provided a usual care safety promotion in lieu of influenza vaccination education.</p> | <p><u>Influenza</u><br/>Proportion of eligible patients receiving vaccination at unknown time</p> <p>Risk difference between treatment and control groups</p> <p>Odds ratio of receiving vaccination between treatment and control groups</p> <p><u>Pneumococcal</u><br/>Not targeted.</p> | <p><u>Influenza</u><br/>Follow-up<br/>Group 1: 111/198 (56.1%)<br/>Control: 86/152 (56.6%)</p> <p>Follow-up<br/>Diff. = -0.5<br/>95% CI = [-11.0, 10.0]</p> <p>Follow-up<br/>OR = 1.40<br/>P = 1.00</p> <p><u>Pneumococcal</u><br/>Not targeted.</p>                                                                                         | <p>No statistically significant differences in the rates of self-reported influenza immunization in the intervention and control groups.</p>                                                                                                                                                                                                          | <p>22</p> |
| <p>Brimberry et al. 1988 (224)</p> | <p>Design:<br/>RCT</p> <p>Group allocation:<br/>Experimental study with random allocation of patients to treatment and control groups.</p> <p>Follow-up period:<br/>3 months</p>  | <p>Number of patients: 787</p> <p><u>Group 1</u><br/>Number of patients: 267<br/>Age and gender distribution not reported.</p> <p><u>Group 2</u><br/>Number of patients: 258<br/>Age and gender distribution not reported.</p> <p><u>Control group</u><br/>Number of patients: 262<br/>Age and gender distribution not reported.</p> <p><u>Eligibility criteria:</u><br/>Patients 65 years or older, or patients with chronic disease. Patients who had already received the season’s received influenza vaccination were</p> | <p>Number of sites: 1 academic family medical centre</p> <p>Site affiliation: University</p> <p>Number of practices or physicians: Not reported</p> <p>Location: United States (Arkansas)</p> | <p><u>Mailed patient reminders vs personalized telephone patient reminders vs usual care</u></p> <p><u>Group 1</u></p> <p>Intervention aim: Improve vaccination rates<br/>QI agent: Family medicine clinic</p> <p>Patient education / reminders: Patients were sent a letter emphasizing their risk of complications following influenza infection and their physician’s recommendation that the patient be vaccinated.</p> <p><u>Group 2</u></p> <p>Patient education / reminders: A clinic receptionist called patients and provided the patient’s personal diagnosis leading</p>                  | <p><u>Influenza</u><br/>Proportion of eligible patients receiving vaccination</p> <p>Odds ratio of receiving vaccination between treatment and control groups</p> <p><u>Pneumococcal</u><br/>Not targeted.</p>                                                                             | <p><u>Influenza</u><br/>Follow-up<br/>Group 1: 26/267 (10%)<br/>Group 2: 24/258 (9%)<br/>Control: 10/262 (4%)</p> <p>Follow-up<br/>Group 1 vs control<br/>OR = 2.72<br/>P = 0.009</p> <p>Group 2 vs control<br/>OR = 2.58<br/>P = 0.01</p> <p>Group 1 vs Group 2<br/>OR = 1.05<br/>P = 1.00</p> <p><u>Pneumococcal</u><br/>Not targeted.</p> | <p>Despite the very low increases in vaccination rates that the two intervention methods produced in this trial, they were nonetheless significantly higher than the no-reminder control.</p> <p>The increased personalization of the telephone reminder method may have increased vaccination compliance over that of the mailed reminder group.</p> | <p>19</p> |

Online Supplementary Data

http://www.annfammed.org/content/10/6/538/DC1

|                              |                                                                                                                                                                                                                       |                                                                                                                                                                                                                                                                                                                                                                                                                                                                        |                                                                                                                                                                                                                                 |                                                                                                                                                                                                                                                                                                                                                                                                                                                                                                                                                                                                        |                                                                                                                                                                                                       |                                                                                                                                                                                                                                                                   |                                                                                                                                                                                                                                                                                                                                                                                                                                          |    |
|------------------------------|-----------------------------------------------------------------------------------------------------------------------------------------------------------------------------------------------------------------------|------------------------------------------------------------------------------------------------------------------------------------------------------------------------------------------------------------------------------------------------------------------------------------------------------------------------------------------------------------------------------------------------------------------------------------------------------------------------|---------------------------------------------------------------------------------------------------------------------------------------------------------------------------------------------------------------------------------|--------------------------------------------------------------------------------------------------------------------------------------------------------------------------------------------------------------------------------------------------------------------------------------------------------------------------------------------------------------------------------------------------------------------------------------------------------------------------------------------------------------------------------------------------------------------------------------------------------|-------------------------------------------------------------------------------------------------------------------------------------------------------------------------------------------------------|-------------------------------------------------------------------------------------------------------------------------------------------------------------------------------------------------------------------------------------------------------------------|------------------------------------------------------------------------------------------------------------------------------------------------------------------------------------------------------------------------------------------------------------------------------------------------------------------------------------------------------------------------------------------------------------------------------------------|----|
|                              |                                                                                                                                                                                                                       | excluded.                                                                                                                                                                                                                                                                                                                                                                                                                                                              |                                                                                                                                                                                                                                 | to eligibility for vaccination, the name of the patient's physician, and a recommendation that the patient be vaccinated for influenza. Questions were referred to a nurse practitioner.<br><br><u>Control group</u><br><br>Usual care.                                                                                                                                                                                                                                                                                                                                                                |                                                                                                                                                                                                       |                                                                                                                                                                                                                                                                   |                                                                                                                                                                                                                                                                                                                                                                                                                                          |    |
| Buchner et al. 1987 (225)    | Design:<br>RCT<br><br>Group allocation:<br>Experimental study with patients randomly allocated to treatment and intervention groups.<br><br>Follow-up period:<br>Not clear.                                           | Number of patients: 655 (390 patients were available at analysis, enumerated below.)<br>Female/male: 254/136<br>Age (mean(sd)): 74.7 (sd not reported)<br><br><u>Group 1</u><br>Number of patients: 196<br><br><u>Control group</u><br>Number of patients: 194<br><br><u>Eligibility criteria:</u><br>Patients 65 years of age or over<br>Nursing home residents, patients who had already received influenza vaccination, and those with egg allergies were excluded. | Number of sites: 3 community internist practices<br><br>Site affiliation: Private practices<br><br>Number of practices or physicians: As above.<br><br>Location: United States (Washington)                                     | <u>Mailed patient reminder card vs usual care</u><br><br>Intervention aim: Improve vaccination rates<br>QI agent: Medical clinics<br><br><u>Group 1</u><br><br>Patient education / reminders: A short message, printed on a 3x5 inch card, was mailed to patients. The message, designed to address determinants of flu shot compliance identified by the health belief model, mentioned patients' eligibility for the "flu shot", the benefits of vaccination, and instructions for receiving vaccination. The cue was signed by patients' physicians.<br><br><u>Control group</u><br><br>Usual care. | <u>Influenza</u><br>Proportion of eligible patients receiving vaccination<br><br>Odds ratio of receiving vaccination between treatment and control groups<br><br><u>Pneumococcal</u><br>Not targeted. | <u>Influenza</u><br>Follow-up<br>Group 1: 108/196 (55%)<br>Control: 105/194 (54%)<br><br>Follow-up<br>OR = 1.04<br>P = 0.92<br><br><u>Pneumococcal</u><br>Not targeted.                                                                                           | In a population exposed to many community influenza vaccination cues aside from the intervention, baseline vaccination rates were 54% - higher than the estimated national baseline vaccination rate.<br><br>The study cue failed to boost vaccination rates above the baseline rate of 54%. This may be due to a ceiling effect.<br><br>Mailing an influenza vaccination cue increased the probability of a clinic visit for flu shots. | 20 |
| Buffington et al. 1991 (226) | Design:<br>Cluster RCT<br><br>Group allocation:<br>Experimental study with physician practices randomly assigned to intervention and control groups within practice-size strata.<br><br>Follow-up period:<br>3 months | Number of patients: 10525<br><br><u>Group 1</u><br>Number of patients: 3604<br>Age and gender distribution not reported<br><br><u>Group 2</u><br>Number of patients: 2149<br>Age and gender distribution not reported<br><br><u>Control group</u><br>Number of patients: 4772<br>Age and gender distribution not                                                                                                                                                       | Number of sites: 13 private physician offices affiliated with a teaching hospital*<br><br>Site affiliation: Private practices<br><br>Number of practices or physicians: 45 physicians<br><br>Location: United States (New York) | <u>Performance feedback charts vs performance feedback charts and patient postcard reminders vs usual care</u><br><br>Intervention aim: Improve vaccination rates<br>QI agent: Physician practices<br><br><u>Group 1</u><br><br>Audit and feedback: A 11x17 inch poster relaying the proportion of the eligible practice population vaccinated in a graphic fashion was placed in the physician office. The chart was updated                                                                                                                                                                          | <u>Influenza</u><br>Proportion of eligible patients receiving vaccination<br><br>Odds ratio of receiving vaccination between treatment and control groups                                             | <u>Influenza</u><br>Follow-up<br>Group 1: 1420/2149 (66%)<br>Group 2: 2427/3604 (67%)<br>Control: 2405/4772 (50%)<br><br>Follow-up<br>Group 1 vs control<br>OR = 1.92<br>P<0.001<br>Group 2 vs control<br>OR = 2.03<br>P<0.001<br>Group 1 vs Group 2<br>OR = 0.95 | A simple target-based system for tracking influenza immunization performance by physicians can improve delivery of vaccine to the elderly.<br><br>The population-based tracking system was readily accepted by physicians and their office personnel, and, when immunizations occurring in public health clinics were included, resulted in rates that easily surpassed the 60% target.                                                  | 20 |

Online Supplementary Data

http://www.annfammed.org/content/10/6/538/DC1

|                          |                                                                                                                                                    |                                                                                                                                                                                                                                                                                                                                                                                                                                                                                                         |                                                                                                                                                                                                                                                                                                                                                                                                                            |                                                                                                                                                                                                                                                                                                                                                                                                    |                                                                                                                                                                                                                                                                                                                               |                                                                                                                                                                                                                                                                                                                  |                                                                                                                                                                                                                                                                                                                                                                                                                                        |    |
|--------------------------|----------------------------------------------------------------------------------------------------------------------------------------------------|---------------------------------------------------------------------------------------------------------------------------------------------------------------------------------------------------------------------------------------------------------------------------------------------------------------------------------------------------------------------------------------------------------------------------------------------------------------------------------------------------------|----------------------------------------------------------------------------------------------------------------------------------------------------------------------------------------------------------------------------------------------------------------------------------------------------------------------------------------------------------------------------------------------------------------------------|----------------------------------------------------------------------------------------------------------------------------------------------------------------------------------------------------------------------------------------------------------------------------------------------------------------------------------------------------------------------------------------------------|-------------------------------------------------------------------------------------------------------------------------------------------------------------------------------------------------------------------------------------------------------------------------------------------------------------------------------|------------------------------------------------------------------------------------------------------------------------------------------------------------------------------------------------------------------------------------------------------------------------------------------------------------------|----------------------------------------------------------------------------------------------------------------------------------------------------------------------------------------------------------------------------------------------------------------------------------------------------------------------------------------------------------------------------------------------------------------------------------------|----|
|                          |                                                                                                                                                    | reported<br><u>Eligibility criteria:</u><br>Patients aged 65 years or older.                                                                                                                                                                                                                                                                                                                                                                                                                            | * Practices were assigned to intervention group 1 (17 physicians), intervention group 2 (13 physicians), and control (15 physicians).                                                                                                                                                                                                                                                                                      | weekly by office staff tracking numbers of vaccinations dispensed.<br><u>Group 2</u><br>Audit and feedback, as above.<br>Patient education / reminders: Postcard vaccination reminders were mailed to all eligible patients.<br><u>Control group</u><br>Usual care.                                                                                                                                | <u>Pneumococcal</u><br>Not targeted.                                                                                                                                                                                                                                                                                          | P < 0.01<br><u>Pneumococcal</u><br>Not targeted.                                                                                                                                                                                                                                                                 | The postcard reminder had little added effect in increasing overall immunization rates.                                                                                                                                                                                                                                                                                                                                                |    |
| Cardozo et al. 1998 (1)  | Design: RCS<br><br>Group allocation: Observational study with patients allocated to treatment and control groups.<br><br>Follow-up period: Unclear | Number of patients: 243<br><u>Group 1</u><br>Number of patients: 132<br>Female/male: 94/38<br>Age (mean(sd)): 77.4 (7.7)<br><u>Control group</u><br>Number of patients: 111<br>Female/male: 82/29<br>Age (mean(sd)): 74.1 (7.5)<br><u>Eligibility criteria:</u><br>Patients were African-Americans over the age of 50 who had received ambulatory care at a study clinic during a 2-year period.<br>Influenza and pneumococcal vaccinations were provided to eligible patients within the study sample. | Number of sites: 1 large academic medical center<br><br>Site affiliation: University<br><br>Number of practices or physicians: 2 ambulatory care clinics *<br><br>Location: United States (Michigan)<br><br>* One clinic was staffed by nurse practitioners and staff physicians and constituted the treatment clinic. The other was staffed by medical residents and staff physicians and constituted the control clinic. | <u>Nurse/physician collaborative care vs usual care</u><br><br>Intervention aim: Improve preventive care<br>QI agent: Medical clinics<br><u>Group 1</u><br><br>Team change: Patients are seen independently for a comprehensive initial visit by a nurse practitioner. Every patient is seen by a staff physician at the second visit, and once a year.<br><u>Control group</u><br><br>Usual care. | <u>Influenza</u><br>Proportion of eligible patients receiving vaccination<br><br>Odds ratio of receiving vaccination between treatment and control groups<br><br><u>Pneumococcal</u><br>Proportion of eligible patients receiving vaccination<br><br>Odds ratio of receiving vaccination between treatment and control groups | <u>Influenza</u><br>Follow-up*<br>Group 1: 125/132 (95%)<br>Control: 51/111 (46%)<br><br>Follow-up<br>OR = 21.0<br>P < 0.001**<br><br><u>Pneumococcal</u><br>Follow-up*<br>Group 1: 120/132 (91%)<br>Control: 6/111 (5%)<br><br>Follow-up<br>OR = 175.0<br>P < 0.001**<br><br>*, ** - See next column, at right. | A model of nurse/physician collaborative practice was able to achieve a high performance of preventive health services in an older, inner city African-American patient population, despite socioeconomic barriers.<br><br>* Proportions extracted visually from a histogram. The denominator may include patients with a previous history of pneumococcal vaccination.<br>** Not reported by authors. Estimated by present reviewers. | 18 |
| Carter et al. 1986 (227) | Design: CCT<br><br>Group allocation: Patients were randomly allocated to treatment and control groups.<br><br>Follow-up period: 1 influenza season | Number of patients: 284 (235 patients available for analysis, reported below)<br><br>Age and gender distributions not reported.<br><u>Group 1</u><br>Number of patients: 121<br><u>Control group</u>                                                                                                                                                                                                                                                                                                    | Number of sites: 1 long-term care general medical clinic<br><br>Site affiliation: Veterans Affairs<br><br>Number of practices or physicians: Not reported.<br><br>Location: United States                                                                                                                                                                                                                                  | <u>Utility-based brochure and clinic reminder letter vs clinic reminder letters alone</u><br><br>Intervention aim: Improve vaccination rates<br>QI agent: Medical clinics<br><u>Group 1</u><br><br>Patient education / reminders: Patients                                                                                                                                                         | <u>Influenza</u><br>Proportion of eligible patients receiving vaccination during<br><br>Odds ratio of receiving vaccination between treatment and control groups<br><br><u>Pneumococcal</u>                                                                                                                                   | <u>Influenza</u><br>Follow-up<br>Group 1: 44/121 (36%)<br>Control: 26/114 (23%)<br><br>Follow-up<br>OR = 1.93<br>P < 0.025<br><br><u>Pneumococcal</u>                                                                                                                                                            | An intervention brochure significantly increased the flu shot rate among participants who had not been vaccinated the previous year compared to standard and augmented clinic letters. The brochure was designed based on differences in the "net weighted relative utility" profiles of vaccinees vs non-vaccinees.                                                                                                                   | 20 |

Online Supplementary Data

http://www.annfammed.org/content/10/6/538/DC1

|                       |                                                                                                                                                                                                               |                                                                                                                                                                                                                                                                                                                                                                                                                      |                                                                                                                                                                                                                                                                                                                                                                                                                                                                                                                      |                                                                                                                                                                                                                                                                                                                                                                                                                                                                                                                                                                                                                                                                                                                                                                                                                                                                                                                                       |                                                                                                                                                                                                                                                                                                     |                                                                                                                                                                                                                                                                                                                                                                                                                                                                                                                                                                                                          |                                                                                                                                          |    |
|-----------------------|---------------------------------------------------------------------------------------------------------------------------------------------------------------------------------------------------------------|----------------------------------------------------------------------------------------------------------------------------------------------------------------------------------------------------------------------------------------------------------------------------------------------------------------------------------------------------------------------------------------------------------------------|----------------------------------------------------------------------------------------------------------------------------------------------------------------------------------------------------------------------------------------------------------------------------------------------------------------------------------------------------------------------------------------------------------------------------------------------------------------------------------------------------------------------|---------------------------------------------------------------------------------------------------------------------------------------------------------------------------------------------------------------------------------------------------------------------------------------------------------------------------------------------------------------------------------------------------------------------------------------------------------------------------------------------------------------------------------------------------------------------------------------------------------------------------------------------------------------------------------------------------------------------------------------------------------------------------------------------------------------------------------------------------------------------------------------------------------------------------------------|-----------------------------------------------------------------------------------------------------------------------------------------------------------------------------------------------------------------------------------------------------------------------------------------------------|----------------------------------------------------------------------------------------------------------------------------------------------------------------------------------------------------------------------------------------------------------------------------------------------------------------------------------------------------------------------------------------------------------------------------------------------------------------------------------------------------------------------------------------------------------------------------------------------------------|------------------------------------------------------------------------------------------------------------------------------------------|----|
|                       |                                                                                                                                                                                                               | <p>Number of patient: 114</p> <p><u>Eligibility criteria:</u> Active clinic patients who had not obtained a flu shot the previous year. Eligible patients were 65 years or older, or had a diagnosis of diabetes, chronic lung, or chronic heart disease. Patients were excluded if they resided in a nursing home, or had severely disabling mental, visual, or hearing impairments.</p>                            | (Washington)                                                                                                                                                                                                                                                                                                                                                                                                                                                                                                         | <p>received clinic letters recommending that they receive vaccination. Additionally, patients received a brochure. The brochure had been designed to address the perceptions that differed between flu vaccinees and non-vaccinees in a prior utility-based study.</p> <p><u>Control group</u></p> <p>Patient education / reminders: Patients received clinic letters recommending that they receive vaccination.</p>                                                                                                                                                                                                                                                                                                                                                                                                                                                                                                                 | Not targeted.                                                                                                                                                                                                                                                                                       | Not targeted.                                                                                                                                                                                                                                                                                                                                                                                                                                                                                                                                                                                            |                                                                                                                                          |    |
| CDC et al. 1995 (228) | <p>Design: Cluster-RCT</p> <p>Group allocation: Experimental study with geographic ZIP code regions in two states were randomly assigned to treatment and control groups.</p> <p>Follow-up period: 1 year</p> | <p>Number of patients: Not reported.</p> <p><u>Group 1</u><br/>Number of patients: Not reported</p> <p><u>Group 2</u><br/>Number of patients: Not reported</p> <p><u>Control group</u><br/>Number of patients: Not reported</p> <p><u>Eligibility criteria:</u><br/>Patients aged 65 years or older enrolled in Medicare Part B. Included patients were alive and continuously enrolled during the study period.</p> | <p>Number of sites: 1 Non-profit foundation affiliated with state Medicare agencies (Montana-Wyoming Foundation for Medical Care)</p> <p>Site affiliation: Government, Medicare</p> <p>Number of practices or physicians: 40 ZIP code regions, number of clinic sites not reported. *</p> <p>Location: United States (Montana and Wyoming)</p> <p>* Sites were allocated to intervention with a personalized letter (4 regions), intervention with a form letter (4 regions) and to no intervention (32 regions)</p> | <p><u>Personalized letters and educational brochures from a state Medicare-affiliate vs form letters and brochures from a state Medicare-affiliate vs usual care</u></p> <p>Intervention aim: Improve vaccination rates<br/>QI agent: Non-profit Medicare affiliate</p> <p><u>Group 1 – Personalized letter</u></p> <p>Patient education / reminders: influenza reminder letters and informational brochures were sent to Medicare beneficiaries. The letter was personalized from the medical director of the Montana-Wyoming Foundation for Medical Care.</p> <p><u>Group 2 – Form letters</u></p> <p>Patient education / reminders: influenza reminder letters and informational brochures were sent to Medicare beneficiaries. The letter was a form letter from the Montana-Wyoming Foundation for Medical Care.</p> <p><u>Control group</u></p> <p>Usual care. All regions were subject to concurrent mass media campaigns.</p> | <p><u>Influenza</u><br/>Proportion of eligible patients receiving vaccination</p> <p>Difference in change in proportions vaccinated in letter regions vs non-intervention control regions</p> <p>Odds ratio of receiving vaccination between treatment (Group 1 and Group 2) and control groups</p> | <p><u>Influenza</u><br/>Baseline - Montana<br/>Group 1: 41%<br/>Group 2: 46%<br/>Control: 42%</p> <p>Follow-up - Montana<br/>Group 1: 50%<br/>Group 2: 53%<br/>Control: 47%</p> <p>Baseline - Wyoming<br/>Group 1: 24%<br/>Group 2: 21%<br/>Control: 22%</p> <p>Follow-up - Wyoming<br/>Group 1: 43%<br/>Group 2: 40%<br/>Control: 33%</p> <p>Follow-up – All states<br/>Group 1 and 2 vs Control d = 6.1%<br/>95% CI = [5.5%, 6.7%]</p> <p>Follow-up – All states<br/>All patients<br/>OR = 1.3<br/>95% CI = [1.3, 1.4]</p> <p>Patients vaccinated at baseline<br/>OR = 1.2<br/>95% CI = [1.2, 1.3]</p> | <p>The Montana and Wyoming intervention resulted in a statistically significant, although modest, improvement in vaccination levels.</p> | 21 |

Online Supplementary Data

http://www.annfammed.org/content/10/6/538/DC1

|                            |                                                                                                                                                                                                |                                                                                                                                                                                                                                                                                                                                                                                                                                                                                                                                                                                                                                                                                                                                                                                                                                   |                                                                                                                                                                                                                                                                                                    |                                                                                                                                                                                                                                                                                                                                                                                                                                                                                                                                                                                                  |                                                                                                                                                                                                                |                                                                                                                                                                                                                                                                                                                                                    |                                                                                                                                                                                                                                                                                                                                   |    |
|----------------------------|------------------------------------------------------------------------------------------------------------------------------------------------------------------------------------------------|-----------------------------------------------------------------------------------------------------------------------------------------------------------------------------------------------------------------------------------------------------------------------------------------------------------------------------------------------------------------------------------------------------------------------------------------------------------------------------------------------------------------------------------------------------------------------------------------------------------------------------------------------------------------------------------------------------------------------------------------------------------------------------------------------------------------------------------|----------------------------------------------------------------------------------------------------------------------------------------------------------------------------------------------------------------------------------------------------------------------------------------------------|--------------------------------------------------------------------------------------------------------------------------------------------------------------------------------------------------------------------------------------------------------------------------------------------------------------------------------------------------------------------------------------------------------------------------------------------------------------------------------------------------------------------------------------------------------------------------------------------------|----------------------------------------------------------------------------------------------------------------------------------------------------------------------------------------------------------------|----------------------------------------------------------------------------------------------------------------------------------------------------------------------------------------------------------------------------------------------------------------------------------------------------------------------------------------------------|-----------------------------------------------------------------------------------------------------------------------------------------------------------------------------------------------------------------------------------------------------------------------------------------------------------------------------------|----|
|                            |                                                                                                                                                                                                |                                                                                                                                                                                                                                                                                                                                                                                                                                                                                                                                                                                                                                                                                                                                                                                                                                   |                                                                                                                                                                                                                                                                                                    |                                                                                                                                                                                                                                                                                                                                                                                                                                                                                                                                                                                                  |                                                                                                                                                                                                                | <p>Patients un-vaccinated at baseline<br/>OR = 1.4<br/>95% CI = [1.3, 1.4]</p> <p><u>Pneumococcal</u><br/>Not targeted.</p> <p><u>Pneumococcal</u><br/>Not targeted.</p>                                                                                                                                                                           |                                                                                                                                                                                                                                                                                                                                   |    |
| Chambers et al. 1991 (229) | <p>Design:<br/>Cluster RCT</p> <p>Group allocation:<br/>Experimental study with randomized allocation of physicians to treatment and control groups.</p> <p>Follow-up period:<br/>2 months</p> | <p>Number of patients: 686<br/>Female/male: 160/505*<br/>Age (mean(sd)): Not reported</p> <p><u>Group 1</u><br/>Number of patients: 271<br/>Age &gt;= 65: 73%<br/>Gender distribution not reported.</p> <p><u>Group 1</u><br/>Number of patients: 146<br/>Age &gt;= 65: 74%<br/>Gender distribution not reported.</p> <p><u>Control group</u><br/>Number of patients: 218**<br/>Age &gt;= 65: 76%<br/>Gender distribution not reported.</p> <p><u>Eligibility criteria:</u><br/>Patients age 65 years or older, or patients with chronic diseases. Patients already having received vaccination, or patients who saw physicians assigned to different study groups were excluded.</p> <p>* Incomplete data<br/>** 1 physician and associated patients excluded from the analysis in Chambers et al. as a performance outlier.</p> | <p>Number of sites: 1<br/>academic department of family medicine</p> <p>Site affiliation: University</p> <p>Number of practices or physicians: 30*</p> <p>Location: United States (Pennsylvania)</p> <p>* Physicians randomly allocated to treatment and control groups, numbers not reported.</p> | <p><u>Computer generated chart reminders in 100% of charts vs computer generated chart reminders in 50% of charts vs usual care</u></p> <p>Intervention aim: Improve vaccination rates<br/>QI agent: Department of Family Medicine</p> <p><u>Group 1</u><br/>Clinician reminders: Reminder forms printed and fixed to each eligible patient's visit chart. Patient eligibility determined from an EMR.</p> <p><u>Group 2</u><br/>Clinician reminders as above, except reminders were printed and fixed to 50% of eligible patients' visit charts.</p> <p><u>Control group</u><br/>Usual care</p> | <p><u>Influenza</u><br/>Proportion of eligible patients receiving vaccination</p> <p>Odds ratio of receiving vaccination between treatment and control groups</p> <p><u>Pneumococcal</u><br/>Not targeted.</p> | <p><u>Influenza</u><br/>Follow-up<br/>Group 1: 137/271 (51%)<br/>Group 2: 42/146 (29%)<br/>Control: 65/218 (30%)</p> <p>Follow-up<br/>Group 1 vs control<br/>OR = 2.41<br/>P &lt; 0.001</p> <p>Group 2 vs control<br/>OR = 0.95<br/>P = 0.91</p> <p>Overall test of significance<br/>P &lt; 0.001</p> <p><u>Pneumococcal</u><br/>Not targeted.</p> | <p>Computer-generated reminders to physicians resulted in significant increases in the number of patients immunized against influenza.</p> <p>Independent predictors of immunization include: more visits, and age &gt;65 years. Reminders are most effective when they are provided for every appropriate patient encounter.</p> | 22 |
| Chan et al. 2002 (230)     | <p>Design:<br/>Cross-over cluster</p>                                                                                                                                                          | <p>Number of patients: 4300</p>                                                                                                                                                                                                                                                                                                                                                                                                                                                                                                                                                                                                                                                                                                                                                                                                   | <p>Number of sites: 135<br/>physiatrists billing</p>                                                                                                                                                                                                                                               | <p><u>Clinician education letters vs usual care</u></p>                                                                                                                                                                                                                                                                                                                                                                                                                                                                                                                                          | <p><u>Influenza</u><br/>Proportion of eligible patients</p>                                                                                                                                                    | <p><u>Influenza</u><br/>Follow-up</p>                                                                                                                                                                                                                                                                                                              | <p>The use of physician reminders to physiatrists seeing Medicare</p>                                                                                                                                                                                                                                                             | 25 |

Online Supplementary Data

http://www.annfammed.org/content/10/6/538/DC1

|                                 |                                                                                                                                                                                                               |                                                                                                                                                                                                                                                                                                                                                                                                                                                                                                                                                                                                                                                                                                                                             |                                                                                                                                                                                                    |                                                                                                                                                                                                                                                                                                                                         |                                                                                                                                                                                                                                  |                                                                                                                                                                                                                                                                                                                                                                                                                                                                                                                                                                                                                                                                                                                                                           |                                                                                                                                                                                                                                                                                                                                                             |           |
|---------------------------------|---------------------------------------------------------------------------------------------------------------------------------------------------------------------------------------------------------------|---------------------------------------------------------------------------------------------------------------------------------------------------------------------------------------------------------------------------------------------------------------------------------------------------------------------------------------------------------------------------------------------------------------------------------------------------------------------------------------------------------------------------------------------------------------------------------------------------------------------------------------------------------------------------------------------------------------------------------------------|----------------------------------------------------------------------------------------------------------------------------------------------------------------------------------------------------|-----------------------------------------------------------------------------------------------------------------------------------------------------------------------------------------------------------------------------------------------------------------------------------------------------------------------------------------|----------------------------------------------------------------------------------------------------------------------------------------------------------------------------------------------------------------------------------|-----------------------------------------------------------------------------------------------------------------------------------------------------------------------------------------------------------------------------------------------------------------------------------------------------------------------------------------------------------------------------------------------------------------------------------------------------------------------------------------------------------------------------------------------------------------------------------------------------------------------------------------------------------------------------------------------------------------------------------------------------------|-------------------------------------------------------------------------------------------------------------------------------------------------------------------------------------------------------------------------------------------------------------------------------------------------------------------------------------------------------------|-----------|
|                                 | <p>RCT</p> <p>Group allocation: Experimental study with physicians or physician groups allocated randomly to treatment and control groups in 1997, crossed over in 1998.</p> <p>Follow-up period: 2 years</p> | <p><u>Group 1*</u><br/>Number of patients: 2827<br/>Female/male: 1129/1698<br/>Age (mean(sd)): 69.7-72.7 (sd not reported)</p> <p><u>Control group*</u><br/>Number of patients: 1473<br/>Female/male: 831/642<br/>Age (mean(s)): 67.2-69.5 (sd not reported)</p> <p>Treatment and control groups were reversed (crossed-over) for the second follow-up time.</p> <p><u>Eligibility criteria:</u><br/>Medicare patients (&gt;= 65 years) seen by a study physiatrist. Patients seen by more than 1 physiatrist were excluded.</p> <p>* Patient age and gender distributions provided separately for solo and group practices, combined here. Sample composition reported for the first follow-up time after intervention implementation.</p> | <p>Medicare in Washington state</p> <p>Site affiliation: Private practices</p> <p>Number of practices or physicians: As above.</p> <p>Location: United States (Washington)</p>                     | <p>Intervention aim: Improve vaccination rates</p> <p>QI agent: Research group sending state-wide letters</p> <p><u>Group 1</u></p> <p>Clinician reminders: Physicians received 4 monthly mailings, each reminding the physician to have their patients immunized against influenza.</p> <p><u>Control group</u></p> <p>Usual care.</p> | <p>receiving vaccination</p> <p>Risk ratio of receiving vaccination between treatment and control groups</p> <p><u>Pneumococcal</u><br/>Not targeted.</p>                                                                        | <p>1997 solo practitioners<br/>Group 1: 473/1486 (32%)<br/>Control: 225/596 (38%)</p> <p>1997 group practitioners<br/>Group 1: 570/1341 (43%)<br/>Control: 264/877 (30%)</p> <p>1998 solo practitioners<br/>Group 1: 228/561 (41%)<br/>Control: 414/1310 (32%)</p> <p>1998 group practitioners<br/>Group 1: 309/868 (36%)<br/>Control: 547/1286 (43%)</p> <p>Follow-up time<br/>1997 solo practitioners<br/>RR = 0.89*<br/>95% CI [0.63, 1.26]</p> <p>1997 group practitioners<br/>RR = 1.26*<br/>95% CI [0.98, 1.60]</p> <p>1998 solo practitioners<br/>RR = 1.34*<br/>95% CI [0.96, 1.88]</p> <p>1998 group practitioners<br/>RR = 0.83*<br/>95% CI = [0.73, 1.36]</p> <p><u>Pneumococcal</u><br/>Not targeted.</p> <p>* See next column, at right.</p> | <p>beneficiaries has a minimal effect on improving influenza vaccination rates.</p> <p>These results support the idea that most physiatrists do not see themselves as providers of primary care for their patients.</p> <p>* Random effects log-binomial regression, adjusted for clustering within clinics, patient age, gender, and number of claims.</p> |           |
| <p>Cheney et al. 1987 (231)</p> | <p>Design: Cluster RCT</p> <p>Group allocation: Internal medicine residents were randomly allocated to treatment and control groups.</p> <p>Follow-up period:</p>                                             | <p>Number of patients: Not reported.</p> <p><u>Group 1</u><br/>Not reported.</p> <p><u>Control group</u><br/>Not reported.</p> <p><u>Eligibility criteria:</u><br/>Patients aged 60 years or older,</p>                                                                                                                                                                                                                                                                                                                                                                                                                                                                                                                                     | <p>Number of sites: 1 outpatient internal medicine clinic</p> <p>Site affiliation: University</p> <p>Number of practices or physicians: 75 resident physicians*</p> <p>Location: United States</p> | <p><u>Preventive care checklist vs usual care</u></p> <p>Intervention aim: Improve preventive care</p> <p>QI agent: Medical clinics</p> <p><u>Group 1</u></p> <p>Clinician reminders: Age and gender specific preventive care checklists were affixed to charts for each physician to</p>                                               | <p><u>Influenza</u><br/>Proportion of eligible patients receiving vaccination</p> <p>Odds ratio of receiving vaccination between treatment and control groups</p> <p><u>Pneumococcal</u><br/>Proportion of eligible patients</p> | <p><u>Influenza</u><br/>Follow-up<br/>Group 1: 46%<br/>Control: 22%</p> <p>Follow-up<br/>OR = 3.02*<br/>P = 0.01**</p> <p><u>Pneumococcal</u><br/>Follow-up</p>                                                                                                                                                                                                                                                                                                                                                                                                                                                                                                                                                                                           | <p>Checklists were effective reminders, and their use led to higher rates for implementation of preventive care measures. The provision and use of the checklist was associated with a significant improvement in the rate of immunizations.</p>                                                                                                            | <p>20</p> |

Online Supplementary Data

http://www.annfammed.org/content/10/6/538/DC1

|                           |                                                                                                                                                                                                                               |                                                                                                                                                                                                                                                                                                                                                                                                                                                                                       |                                                                                                                                                                                                                                                                                                                            |                                                                                                                                                                                                                                                                                                                                                                                                                                                                    |                                                                                                                                                                                                                                                                                                                                       |                                                                                                                                                                                                                                                                      |                                                                                                                                                                                                                                                                                                                                   |    |
|---------------------------|-------------------------------------------------------------------------------------------------------------------------------------------------------------------------------------------------------------------------------|---------------------------------------------------------------------------------------------------------------------------------------------------------------------------------------------------------------------------------------------------------------------------------------------------------------------------------------------------------------------------------------------------------------------------------------------------------------------------------------|----------------------------------------------------------------------------------------------------------------------------------------------------------------------------------------------------------------------------------------------------------------------------------------------------------------------------|--------------------------------------------------------------------------------------------------------------------------------------------------------------------------------------------------------------------------------------------------------------------------------------------------------------------------------------------------------------------------------------------------------------------------------------------------------------------|---------------------------------------------------------------------------------------------------------------------------------------------------------------------------------------------------------------------------------------------------------------------------------------------------------------------------------------|----------------------------------------------------------------------------------------------------------------------------------------------------------------------------------------------------------------------------------------------------------------------|-----------------------------------------------------------------------------------------------------------------------------------------------------------------------------------------------------------------------------------------------------------------------------------------------------------------------------------|----|
|                           | 9 months                                                                                                                                                                                                                      | attending the clinic during the study period.                                                                                                                                                                                                                                                                                                                                                                                                                                         | (California)<br><br>* 33 residents and 42 residents were allocated to treatment and control groups, respectively.                                                                                                                                                                                                          | review.<br><br><u>Control group</u><br><br>Usual care                                                                                                                                                                                                                                                                                                                                                                                                              | receiving vaccination (period of surveillance)                                                                                                                                                                                                                                                                                        | Group 1: 20%<br>Control: 3%<br><br>Follow-up<br>OR = 8.08*<br>P < 0.02**<br><br>*, ** - See next column, at right.                                                                                                                                                   | * Unadjusted for clustering effects. Calculated by present reviewers from percentages<br><br>** Adjusted for clustering of patients within physicians.                                                                                                                                                                            |    |
| Clayton et al. 1999 (232) | Design:<br>CCT<br><br>Group allocation:<br>Experimental study with patients randomly allocated to treatment and control groups.<br><br>Follow-up period:<br>3 months                                                          | Number of patients: 4278<br><br><u>Group 1</u><br>Number of patients: 2631<br>Female/male: 1481/1150<br>Age (mean(sd)): 73.4 (6.16)<br><br><u>Control group</u><br>Number of patients: 2647<br>Female/male: 1467/1180<br>Age (mean(sd)): 73.5 (6.12)<br><br><u>Eligibility criteria:</u><br>HMO members aged 65 years or older, enrolled in group model health centers. A concurrent control group was designed only for patients who received influenza vaccination the year before. | Number of sites: 1 large health maintenance organization<br><br>Site affiliation: Private MCO<br><br>Number of practices or physicians: Not reported<br><br>Location: United States (Multiple states in the Northeastern region)                                                                                           | <u>Mailed patient reminder postcard vs usual care</u><br><br>Intervention aim: Improve vaccination rates<br>QI agent: Large HMO<br><br><u>Group 1</u><br><br>Patient education / reminders: A post card reminder was sent to patients.<br><br><u>Control group</u><br><br>All patients received the HMO's standard member educational materials.                                                                                                                   | <u>Influenza</u><br>Proportion of eligible patients receiving vaccination<br><br><br>Odds ratio of receiving vaccination between treatment and control groups<br><br><u>Pneumococcal</u><br>Proportion of eligible patients receiving vaccination                                                                                     | <u>Influenza</u><br>Follow-up<br>Group 1: 2067/2631 (79%)<br>Control: 2043/2647 (77%)<br><br>Follow-up<br>OR = 1.08<br>P = 0.222<br><br><u>Pneumococcal</u><br>Not targeted.                                                                                         | This study supports the reallocation of resources to more targeted outreach. Postcard interventions should be discontinued among seniors vaccinated the previous year, with funds redirected to more intensive outreach among those at highest risk of not accepting vaccination, i.e.: seniors not vaccinated the previous year. | 26 |
| Cohen et al. 1982 (233)   | Design:<br>Cluster-RCT<br><br>Group allocation:<br>Patient-physician practice clusters (firms) at a general medicine department were randomly allocated to treatment and control groups.<br><br>Follow-up period:<br>4 months | Number of patients: 872<br>Age and gender distributions not reported.<br><br><u>Group 1</u><br>Number of patients: 581<br><br><u>Control group</u><br>Number of patients: 291<br><br><u>Eligibility criteria:</u><br>Patients aged 65 years or older. Patients eligible for pneumococcal vaccination had not been previously vaccinated.                                                                                                                                              | Number of sites: 1 academic general medicine outpatient department<br><br>Site affiliation: University<br><br>Number of practices or physicians: 3 firms, i.e.: patient-physician practice clusters.*<br><br>Location: United States (Ohio)<br><br>* 2 firms were allocated to treatment, 1 firm was allocated to control. | <u>Preventive care checklists vs usual care.</u><br><br>Intervention aim: Improve preventive care<br>QI agent: Medical clinic<br><br><u>Group 1</u><br><br>Clinician reminders: An age appropriate checklist was affixed to the patient chart before each visit. A research assistant completed the checklist after a brief chart review. Final orders were determined by the physician.<br><br>Clinician education: Seminars were held on preventive care topics. | <u>Influenza</u><br>Proportion of eligible patients receiving vaccination<br><br><br>Odds ratio of receiving vaccination between treatment and control groups<br><br><u>Pneumococcal</u><br>Proportion of eligible patients receiving vaccination<br><br><br>Odds ratio of receiving vaccination between treatment and control groups | <u>Influenza</u><br>Follow-up*<br>Group 1: 186/581 (32%)<br>Control: 12/291 (4%)<br><br>Follow-up<br>OR = 10.95<br>P < 0.001<br><br><u>Pneumococcal</u><br>Follow-up *<br>Group 1: 230/547 (42%)<br>Control: 14/291 (5%)<br><br>Follow-up<br>OR = 14.36<br>P < 0.001 | An improvement in residents' attitudes towards and use of preventive procedures, including influenza and pneumococcal vaccination, occurred in clinics implementing a simple reminder checklist.                                                                                                                                  | 21 |



Online Supplementary Data

http://www.annfammed.org/content/10/6/538/DC1

|                         |                                                                                                                                                                                                          |                                                                                                                                                                                                                                                                                                                                                                                                                                                                                      |                                                                                                                                                                                                                                                                                                    |                                                                                                                                                                                                                                                                                                                                                                                                                                                                              |                                                                                                                                                                                                                                                                                 |                                                                                                                                                                                                                                                                                                                                                  |                                                                                                                                                                                                                                                                                                                                                                                                          |    |
|-------------------------|----------------------------------------------------------------------------------------------------------------------------------------------------------------------------------------------------------|--------------------------------------------------------------------------------------------------------------------------------------------------------------------------------------------------------------------------------------------------------------------------------------------------------------------------------------------------------------------------------------------------------------------------------------------------------------------------------------|----------------------------------------------------------------------------------------------------------------------------------------------------------------------------------------------------------------------------------------------------------------------------------------------------|------------------------------------------------------------------------------------------------------------------------------------------------------------------------------------------------------------------------------------------------------------------------------------------------------------------------------------------------------------------------------------------------------------------------------------------------------------------------------|---------------------------------------------------------------------------------------------------------------------------------------------------------------------------------------------------------------------------------------------------------------------------------|--------------------------------------------------------------------------------------------------------------------------------------------------------------------------------------------------------------------------------------------------------------------------------------------------------------------------------------------------|----------------------------------------------------------------------------------------------------------------------------------------------------------------------------------------------------------------------------------------------------------------------------------------------------------------------------------------------------------------------------------------------------------|----|
|                         |                                                                                                                                                                                                          |                                                                                                                                                                                                                                                                                                                                                                                                                                                                                      |                                                                                                                                                                                                                                                                                                    | <p><u>Control group</u></p> <p>Clinician education, as above.</p>                                                                                                                                                                                                                                                                                                                                                                                                            |                                                                                                                                                                                                                                                                                 | <p>* These figures are unadjusted for potential unit of analysis errors. However, authors performed sensitivity analyses at the physician level, with <math>p &lt; 0.001</math> reported.</p>                                                                                                                                                    |                                                                                                                                                                                                                                                                                                                                                                                                          |    |
| Cowan et al. 1992 (234) | <p>Design:<br/>Cluster RCT</p> <p>Group allocation:<br/>Experimental study with randomized allocation of medical residents to intervention and control groups.</p> <p>Follow-up period:<br/>Unclear.</p> | <p>Number of patients: 107</p> <p><u>Group 1</u><br/>Number of patients: 62<br/>Female/male: 35/27<br/>Age (mean(sd)): 60 (sd not reported)</p> <p><u>Control group</u><br/>Number of patients: 45<br/>Female/male: 25/20<br/>Age (mean(sd)): 57 (sd not reported)</p> <p><u>Eligibility criteria:</u><br/>Vaccinations were provided for adults &gt;65 years old. Patients were only counted towards pneumococcal vaccination rates if they had not been previously vaccinated.</p> | <p>Number of sites: 1 academic medical center</p> <p>Site affiliation: University</p> <p>Number of practices or physicians: 29 medical residents</p> <p>Location: United States (Illinois)</p>                                                                                                     | <p><u>Generic clinician reminder sheet vs usual care</u></p> <p>Intervention aim: Improve preventive care<br/>QI agent: Medical clinic</p> <p><u>Group 1</u></p> <p>Clinician reminders: A periodic health examination fact sheet, containing age and sex specific recommendation on seven periodic health examination actions, was attached to the front of every patient chart.</p> <p><u>Control group</u></p> <p>Usual care.</p>                                         | <p><u>Influenza</u><br/>Proportion of eligible patients receiving vaccination</p> <p>Odds ratio of receiving vaccination between treatment and control groups</p> <p><u>Pneumococcal</u><br/>Proportion of eligible patients receiving vaccination</p>                          | <p><u>Influenza</u><br/>Follow-up<br/>Group 1: 11/30 (37%)<br/>Control: 9/24 (38%)</p> <p>Follow-up<br/>OR = 0.96<br/>P = 1.00</p> <p><u>Pneumococcal</u><br/>Follow-up<br/>Group 1: 3/29 (10%)<br/>Control: 0/23 (0%)</p> <p>Follow-up<br/>OR = 5.31*<br/>P = 0.25</p> <p>* Division by zero avoided by adding 0.5 to cells with no events.</p> | <p>A reminder system consisting of generic age- and sex- specific recommendation for the periodic health examination did not significantly improve performance of preventive procedures by medical residents.</p> <p>Low performance may have been due to the non-interactive nature of the fact sheet, which was designed to provide information only.</p>                                              | 25 |
| Dalby et al. 2000 (235) | <p>Design:<br/>RCT</p> <p>Group allocation:<br/>Experimental study with patients randomly assigned to treatment and control groups.</p> <p>Follow-up period:<br/>14 months</p>                           | <p>Number of patients: 142</p> <p><u>Group 1</u><br/>Number of patients: 73<br/>Female/male: 52/21<br/>Age (mean(sd)): 79.1 (5.8)</p> <p><u>Control group</u><br/>Number of patients: 69<br/>Female/male: 43/26<br/>Age (mean(sd)): 78.1 (5.3)</p> <p><u>Eligibility criteria:</u><br/>Patients 70 years or older, reporting functional impairment, or admission to hospital, or bereavement in the previous 6 months.</p>                                                           | <p>Number of sites: 1 Ontario Health Service<br/>Organization (HSO), i.e.: a primary care practice in which medical services are remunerated by capitation.</p> <p>Site affiliation: Private practice</p> <p>Number of practices or physicians: 2 physicians</p> <p>Location: Canada (Ontario)</p> | <p><u>Preventive home visits by a nurse vs usual care</u></p> <p>Intervention aim: Improve care of the elderly<br/>QI agent: Medical clinic</p> <p><u>Group 1</u></p> <p>Team change: A nurse visited the household of each community-dwelling elderly patient. Nurses provided influenza immunizations on home visits after the development of a care plan.</p> <p>Case management: Nurses reviewed each person's medical record and completed an assessment addressing</p> | <p><u>Influenza</u><br/>Proportion of eligible patients receiving vaccination</p> <p>Odds ratio of receiving vaccination between treatment and control groups</p> <p><u>Pneumococcal</u><br/>Proportion of eligible patients receiving vaccination (period of surveillance)</p> | <p><u>Influenza</u><br/>Follow-up*<br/>Group 1: 51/59 (90%)<br/>Control: 29/54 (53%)</p> <p>Follow-up<br/>OR = 5.50<br/>P &lt; 0.001</p> <p><u>Pneumococcal</u><br/>Follow-up*<br/>Group 1: 48/59 (82%)<br/>Control: 0/54 (0%)</p> <p>Follow-up<br/>OR = 471.27<br/>P &lt; 0.001</p>                                                             | <p>Case management/ nurse visit quality improvement intervention improved vaccination rates among the elderly at risk for health deterioration.</p> <p>Combined rates of deaths and admissions to an institution were similar between the 2 groups. Nursing case management frequently uncovered new conditions, which may have led to an increase in health services utilization in the short term.</p> | 20 |

Online Supplementary Data

http://www.annfammed.org/content/10/6/538/DC1

|                           |                                                                                                                                                                                                                                   |                                                                                                                                                                                                                                                                                                                                                                                                                                                                                     |                                                                                                                                                                                                                                                                                                   |                                                                                                                                                                                                                                                                                                                                                                                                                                                                                                                                                                                                                                                                             |                                                                                                                                                                                                                                                                                              |                                                                                                                                                                                                                                                                                                                                                                                              |                                                                                                                                    |    |
|---------------------------|-----------------------------------------------------------------------------------------------------------------------------------------------------------------------------------------------------------------------------------|-------------------------------------------------------------------------------------------------------------------------------------------------------------------------------------------------------------------------------------------------------------------------------------------------------------------------------------------------------------------------------------------------------------------------------------------------------------------------------------|---------------------------------------------------------------------------------------------------------------------------------------------------------------------------------------------------------------------------------------------------------------------------------------------------|-----------------------------------------------------------------------------------------------------------------------------------------------------------------------------------------------------------------------------------------------------------------------------------------------------------------------------------------------------------------------------------------------------------------------------------------------------------------------------------------------------------------------------------------------------------------------------------------------------------------------------------------------------------------------------|----------------------------------------------------------------------------------------------------------------------------------------------------------------------------------------------------------------------------------------------------------------------------------------------|----------------------------------------------------------------------------------------------------------------------------------------------------------------------------------------------------------------------------------------------------------------------------------------------------------------------------------------------------------------------------------------------|------------------------------------------------------------------------------------------------------------------------------------|----|
|                           |                                                                                                                                                                                                                                   | Exclusions: Nursing home, involved in other research study, or had participated in a pretest of the study survey instrument.                                                                                                                                                                                                                                                                                                                                                        |                                                                                                                                                                                                                                                                                                   | physical, cognitive, emotional and social function, medication use, and safety and suitability of the home environment. A care plan was developed with the primary care physician, the patient, the patient's family, caregivers, and other health care professionals. The intervention adhered to the "functional consequences theory" of gerontologic nursing, and aimed at minimizing the negative effects of age-related changes and promoting positive function. Follow-up visits and phone calls were provided as needed over 14 months. Nurses played an important role in integrating health and community services.<br><br><u>Control group</u><br><br>Usual care. |                                                                                                                                                                                                                                                                                              | * Follow-up rates were 81% and 78% in the treatment and control groups. Results provided for patients completing the trial.<br>** With substitution of 0.5 for zero cells.                                                                                                                                                                                                                   |                                                                                                                                    |    |
| Demakis et al. 2000 (236) | Design: Cluster-RCT<br><br>Group allocation: Primary care residents at the study sites were allocated, either in half-day blocks or by clinical teams, randomly to treatment or control group.<br><br>Follow-up period: 17 months | Number of patients: 12989<br>Age (mean(sd)): 65.9 (10.9)<br>Gender (female/male): 1.6%/98.4%<br><br><u>Group 1</u><br>Number of patients: Not reported.<br><br><u>Control group</u><br>Number of patients: Not reported.<br><br><u>Eligibility criteria:</u> Medical residents at the study site who were involved in primary care. Patients aged 65 years or higher, or those with high-risk conditions (not specified) were eligible for pneumococcal vaccine once every 5 years. | Number of sites: 12 VA medical centers<br><br>Site affiliation: Veterans Affairs<br><br>Number of practices or physicians: 275 resident physicians*<br><br>Location: United States (Multiple states)<br><br>* 153 and 146 residents were allocated to treatment and control groups, respectively. | <u>Computerized reminder system vs usual care</u><br><br>Intervention aim: Improve preventive care<br>QI agent: Medical clinic<br><br><u>Group 1</u><br><br>Clinician reminders: Computer-generated clinical care reminders for each patient were provided to the resident in the form of a printed summary of health placed at the beginning of the medical chart on the day of a clinic visit. Participating residents were also exposed to the reminders through computer terminals in each examination room.<br><br><u>Control group</u><br><br>Usual care.                                                                                                             | <u>Influenza</u><br>Not targeted.<br><br><u>Pneumococcal</u><br>Proportion of eligible patients receiving vaccination<br><br><br><br>Odds ratio of receiving vaccination between treatment and control groups<br><br><br><br>Proportion of eligible visits in which vaccination was provided | <u>Influenza</u><br>Not targeted.<br><br><u>Pneumococcal</u><br>Baseline*<br>Group 1: 4%<br>Control: 5%<br><br>Follow-up<br>Group 1: 13%<br>Control: 4%<br><br>Follow-up<br>OR = 3.26**<br>95% CI = [2.09, 5.09]<br>P < 0.001<br><br>Follow-up<br>Group 1: 8%<br>Control: 1%<br><br>OR = 7.85**<br>95% CI = [3.83, 16.08]<br>P < 0.001<br><br>* Refers to resident physician behavior during | Higher adherence to standards of care, including pneumococcal vaccination recommendations, were obtained with the reminder system. | 25 |

Online Supplementary Data

http://www.annfammed.org/content/10/6/538/DC1

|                            |                                                                                                                                                                      |                                                                                                                                                                                                                                                                                                                                                                                                                                                                                                                                                              |                                                                                                                                                                                                                                                                       |                                                                                                                                                                                                                                                                                                                                                                                                                                                                                                                                                                                                                                                                                                |                                                                                                                                                                                                                       |                                                                                                                                                                                                                                                                                                               |                                                                                                                                                                                                                                                                                                                                                                                                                               |    |
|----------------------------|----------------------------------------------------------------------------------------------------------------------------------------------------------------------|--------------------------------------------------------------------------------------------------------------------------------------------------------------------------------------------------------------------------------------------------------------------------------------------------------------------------------------------------------------------------------------------------------------------------------------------------------------------------------------------------------------------------------------------------------------|-----------------------------------------------------------------------------------------------------------------------------------------------------------------------------------------------------------------------------------------------------------------------|------------------------------------------------------------------------------------------------------------------------------------------------------------------------------------------------------------------------------------------------------------------------------------------------------------------------------------------------------------------------------------------------------------------------------------------------------------------------------------------------------------------------------------------------------------------------------------------------------------------------------------------------------------------------------------------------|-----------------------------------------------------------------------------------------------------------------------------------------------------------------------------------------------------------------------|---------------------------------------------------------------------------------------------------------------------------------------------------------------------------------------------------------------------------------------------------------------------------------------------------------------|-------------------------------------------------------------------------------------------------------------------------------------------------------------------------------------------------------------------------------------------------------------------------------------------------------------------------------------------------------------------------------------------------------------------------------|----|
|                            |                                                                                                                                                                      |                                                                                                                                                                                                                                                                                                                                                                                                                                                                                                                                                              |                                                                                                                                                                                                                                                                       |                                                                                                                                                                                                                                                                                                                                                                                                                                                                                                                                                                                                                                                                                                |                                                                                                                                                                                                                       | the 2 months before the intervention was implemented, <i>not</i> patient vaccination status in previous years.<br>** Adjusted for clustering within physicians by GEE.                                                                                                                                        |                                                                                                                                                                                                                                                                                                                                                                                                                               |    |
| Dietrich et al. 1989 (237) | <p>Design: CCT</p> <p>Group allocation: Experimental study with patients randomly allocated to treatment and control groups.</p> <p>Follow-up period = 12 months</p> | <p>Number of patients: 117 (114 patients available at analysis, enumerated below.)</p> <p><u>Group 1</u><br/>Number of patients: 59<br/>Female/male: 40/19<br/>Age (mean(sd)): 73.0(6.1)</p> <p><u>Control group</u><br/>Number of patients: 55<br/>Female/male: 37/18<br/>Age (mean(sd)): 75.4(7.0)</p> <p><u>Eligibility criteria:</u><br/>Patients aged 65 years or older with office visits during the 3 month enrollment period. Patients without telephone, or who were transient to the clinic, blind, demented, or terminally ill were excluded.</p> | <p>Number of sites: 1 community medical practice</p> <p>Site affiliation: Private practice</p> <p>Number of practices or physicians: Not reported</p> <p>Location: United States (New Hampshire)</p>                                                                  | <p><u>Patient-held preventive care checklist and patient education mailings vs patient reminder letter only</u></p> <p>Intervention aim: Improve preventive care<br/>QI agent: Medical clinic</p> <p><u>Group 1</u></p> <p>Patient reminders / education: Patients were mailed questionnaires about their personal characteristics and their recent preventive health care; personal prevention checklists; and letters encouraging use of the checklists to track receipt of appropriate preventive care. Preventive care items were explained in detail.</p> <p><u>Control group</u></p> <p>Patient reminder / education: Patients received a reminder letter for influenza vaccinations</p> | <p><u>Influenza</u><br/>Proportion of eligible patients receiving vaccination during</p> <p>Odds ratio of receiving vaccination between treatment and control groups</p> <p><u>Pneumococcal</u><br/>Not targeted.</p> | <p><u>Influenza</u><br/>Baseline<br/>Group 1: 36/59 (61%)<br/>Control: 39/55 (71%)</p> <p>Follow-up<br/>Group 1: Not reported<br/>Control: Not reported</p> <p>Follow-up<br/>OR = Unable to calculate<br/>P &gt; 0.05 (NS)</p> <p><u>Pneumococcal</u><br/>Not targeted.</p>                                   | <p>A small patient-oriented intervention was associated with improved cancer early detection services for older patients, but not with improvements in rates of blood pressure measurement or influenza vaccination.</p> <p>The lack of effectiveness may be due to patient reminder letters in the control group and ceiling effects, respectively.</p>                                                                      | 19 |
| Fishbein et al. 2006 (238) | <p>Design: CBA</p> <p>Group allocation: Patients were allocated in consecutive blocks to treatment and control groups.</p> <p>Follow-up period: 1 year</p>           | <p>Number of patients: 600*</p> <p><u>Group 1</u><br/>Number of patients: 300*<br/>Female (%): 70%<br/>Age (mean(sd)): 48 (sd not reported)</p> <p><u>Control group</u><br/>Number of patients: 300*<br/>Female (%): 66%<br/>Age (mean(sd)): 47 (sd not reported).</p>                                                                                                                                                                                                                                                                                       | <p>Number of sites: 3 family practice sites</p> <p>Site affiliation: 1 academic site, 1 private practice, and 1 primary health centre</p> <p>Number of practices or physicians: 16 physicians</p> <p>Location: United States (Louisiana, New Mexico, and Georgia)</p> | <p><u>Patient self-assessment / provider reminder tool vs usual care</u></p> <p>Intervention aim: Improve vaccination rates<br/>QI agent: Medical clinics</p> <p><u>Group 1</u></p> <p>Facilitated relay of patient information: Patient completed a paper-based self assessment/ provider reminder (A/R) tool. The tool is comprised of a series of yes/no questions that assess patients'</p>                                                                                                                                                                                                                                                                                                | <p><u>Influenza</u><br/>Proportion of eligible patients receiving vaccination</p>                                                                                                                                     | <p><u>Influenza</u><br/>Baseline*<br/>Group 1: 56/175 (32%)<br/>Control: 38/165 (23%)</p> <p>Follow-up – Vaccination during the day the A/R tool was provided **<br/>Group 1: 25/119 (21%)<br/>Control: 31/127 (24%)</p> <p>Follow-up – 1 year after the A/R tool was provided**<br/>Group 1: 24/94 (26%)</p> | <p>Administering the A/R tool increased the proportion of same-day vaccinations for influenza at 2/3 study sites, and increased the proportion of same-day pneumococcal vaccinations at 1/3 study sites. Comparing intervention and control patients all together, the intervention improved same-day pneumococcal vaccinations. No significant difference in vaccination uptake during the period after the A/R tool was</p> | 18 |

Online Supplementary Data

http://www.annfammed.org/content/10/6/538/DC1

|                         |                                                                              |                                                                                                                                                                                                                                                                                                                                                       |                                                                                                |                                                                                                                                                                                                                                                                                                                                                                                                                                                                                                                                      |                                                                                                                                                                                                                                                      |                                                                                                                                                                                                                                                                                                                                                                                                                                                                                                                                                                                                                                                                                                                                                                                                    |                                                                                                                                                                                                                                                                                                                                                                                                                                                                                                                                                                                                                                                                                                                                                                                                    |    |
|-------------------------|------------------------------------------------------------------------------|-------------------------------------------------------------------------------------------------------------------------------------------------------------------------------------------------------------------------------------------------------------------------------------------------------------------------------------------------------|------------------------------------------------------------------------------------------------|--------------------------------------------------------------------------------------------------------------------------------------------------------------------------------------------------------------------------------------------------------------------------------------------------------------------------------------------------------------------------------------------------------------------------------------------------------------------------------------------------------------------------------------|------------------------------------------------------------------------------------------------------------------------------------------------------------------------------------------------------------------------------------------------------|----------------------------------------------------------------------------------------------------------------------------------------------------------------------------------------------------------------------------------------------------------------------------------------------------------------------------------------------------------------------------------------------------------------------------------------------------------------------------------------------------------------------------------------------------------------------------------------------------------------------------------------------------------------------------------------------------------------------------------------------------------------------------------------------------|----------------------------------------------------------------------------------------------------------------------------------------------------------------------------------------------------------------------------------------------------------------------------------------------------------------------------------------------------------------------------------------------------------------------------------------------------------------------------------------------------------------------------------------------------------------------------------------------------------------------------------------------------------------------------------------------------------------------------------------------------------------------------------------------------|----|
|                         |                                                                              | <p><u>Eligibility criteria:</u> Patients aged 18 years or older, not acutely ill, providing written consent. Influenza and pneumococcal vaccinations were recommended for patients aged 65 years or older, or those with select chronic diseases.</p> <p>* Includes patients for whom influenza and pneumococcal vaccinations were not indicated.</p> |                                                                                                | <p>needs for 8 immunizations (reduced to 6 at two of three study sites).</p> <p>Clinician reminders: The A/R tool prompted clinicians to provide recommended vaccinations. The A/R tool also remained part of the patient chart after the initial visit at which it was produced.</p> <p>Patient education: The A/R tool was accompanied by educational material concerning recommended vaccinations.</p> <p><u>Control group</u></p> <p>Usual care. Patients received information on physical activity instead of the A/R tool.</p> | <p>Odds ratio of receiving vaccination between treatment and control groups</p> <p><u>Pneumococcal</u><br/>Proportion of eligible patients receiving vaccination</p> <p>Odds ratio of receiving vaccination between treatment and control groups</p> | <p>Control: 30/96 (31%)</p> <p>Follow-up – Vaccination during the day the A/R tool was provided**<br/>OR = 0.82<br/>P = 0.57</p> <p>Follow-up – 1 year after the A/R tool was provided**<br/>OR = 0.75<br/>P = 0.42</p> <p><u>Pneumococcal</u><br/>Baseline*<br/>Group 1: 45/105 (43%)<br/>Control: 53/112 (47%)</p> <p>Follow-up – Vaccination during the day the A/R tool was provided**<br/>Group 1: 23/60 (38%)<br/>Control: 8/59 (14%)</p> <p>Follow-up – 1 year after the A/R tool was provided**<br/>Group 1: 5/37 (14%)<br/>Control: 7/51 (14%)</p> <p>Follow-up – Vaccination during the day the A/R tool was provided**<br/>OR = 3.96<br/>P = 0.003</p> <p>Follow-up – 1 year after the A/R tool was provided**<br/>OR = 0.98<br/>P = 1.00</p> <p>*, ** - See next column, at right.</p> | <p>administered was observed.</p> <p>Disappointing results may have been due to the large number of vaccinations (8) prompted by the A/R tool. Providers flatly stated that they were not willing, or did not have the time, to consider all eight vaccinations. Authors also suggest that the A/R tool would have become lost among other papers in the patient chart after the initial visit.</p> <p>* Baseline results refer to those patients who had already been vaccinated <i>that season</i> (influenza) or previously (pneumococcal). These patients were removed from the denominator of successive outcome proportions. Baseline proportions do not represent previous years' vaccination status.<br/>** Results differed among intervention sites. Overall results extracted here.</p> |    |
| Frank et al. 2004 (239) | <p>Design: CCT</p> <p>Group allocation: Experimental study with patients</p> | <p>Number of patients: 10507</p> <p><u>Group 1</u><br/>Number of patients: 5118<br/>Female/male: 56% female<br/>Age (mean(sd)): 36.0 (21.7)</p>                                                                                                                                                                                                       | <p>Site affiliation: Private practice</p> <p>Number of sites: 1 Sub-urban general practice</p> | <p><u>Automated EMR reminder prompts vs usual care</u></p> <p>Intervention aim: Improve preventive care<br/>QI agent: Medical clinics</p>                                                                                                                                                                                                                                                                                                                                                                                            | <p><u>Influenza</u><br/>Proportion of patient-contacts with eligible patients resulting in vaccination</p> <p>Odds ratio of a patient contact</p>                                                                                                    | <p><u>Influenza</u><br/>Follow-up<br/>Group 1: 245/935 (26%)<br/>Control: 248/912 (27%)</p> <p>Follow-up</p>                                                                                                                                                                                                                                                                                                                                                                                                                                                                                                                                                                                                                                                                                       | <p>Reminders did not increase influenza vaccination rates, but did increase pneumococcal vaccination rates. Overall, reminders caused only a modest increase in opportunistic uptake.</p>                                                                                                                                                                                                                                                                                                                                                                                                                                                                                                                                                                                                          | 23 |

Online Supplementary Data

http://www.annfammed.org/content/10/6/538/DC1

|                                          |                                                                                                                                                             |                                                                                                                                                                                                                                                                                                                                                                                                                                                                                                                                                                                                                                                                                                                                                           |                                                                                                                                                                                                                                                                                                      |                                                                                                                                                                                                                                                                                                                                                                                                                                                                                                                                                                                                                                                                                                                                                                                                                                                                                                                                 |                                                                                                                                                                                                                                                                                                                                         |                                                                                                                                                                                                                                                                                                                                                                                                                           |                                                                                                                                                                                                                                                                                                                                                                             |           |
|------------------------------------------|-------------------------------------------------------------------------------------------------------------------------------------------------------------|-----------------------------------------------------------------------------------------------------------------------------------------------------------------------------------------------------------------------------------------------------------------------------------------------------------------------------------------------------------------------------------------------------------------------------------------------------------------------------------------------------------------------------------------------------------------------------------------------------------------------------------------------------------------------------------------------------------------------------------------------------------|------------------------------------------------------------------------------------------------------------------------------------------------------------------------------------------------------------------------------------------------------------------------------------------------------|---------------------------------------------------------------------------------------------------------------------------------------------------------------------------------------------------------------------------------------------------------------------------------------------------------------------------------------------------------------------------------------------------------------------------------------------------------------------------------------------------------------------------------------------------------------------------------------------------------------------------------------------------------------------------------------------------------------------------------------------------------------------------------------------------------------------------------------------------------------------------------------------------------------------------------|-----------------------------------------------------------------------------------------------------------------------------------------------------------------------------------------------------------------------------------------------------------------------------------------------------------------------------------------|---------------------------------------------------------------------------------------------------------------------------------------------------------------------------------------------------------------------------------------------------------------------------------------------------------------------------------------------------------------------------------------------------------------------------|-----------------------------------------------------------------------------------------------------------------------------------------------------------------------------------------------------------------------------------------------------------------------------------------------------------------------------------------------------------------------------|-----------|
|                                          | <p>allocated to treatment and control groups by quasi-randomization.</p> <p>Follow-up period: Unclear</p>                                                   | <p><u>Control group</u><br/>Number of patients: 5389<br/>Female/male: 57% female<br/>Age (mean(sd)): 35.4 (21.9)</p> <p><u>Eligibility criteria:</u><br/>GP visits of all adult patients attending the study general practice. Eligible visits for receiving influenza vaccination occurred among patients &gt; 65 years old who had not yet received the current season's vaccination. Eligible visits for receiving pneumococcal vaccination occurred among patients &gt; 65 years old who had not been previously vaccinated.</p>                                                                                                                                                                                                                      | <p>Number of practices or physicians: 10 physicians</p> <p>Location: Australia (South Australia)</p>                                                                                                                                                                                                 | <p><u>Group 1</u><br/>Clinician reminders: Physicians, all of whom were experienced EMR users, received on-screen preventive care prompts for eligible patients.</p> <p><u>Control group</u><br/>Usual care</p>                                                                                                                                                                                                                                                                                                                                                                                                                                                                                                                                                                                                                                                                                                                 | <p>resulting in vaccination between treatment and control groups</p> <p><u>Pneumococcal</u><br/>Proportion of patient-contacts with eligible patients resulting in vaccination</p> <p>Odds ratio of a patient contact resulting in vaccination between treatment and control groups</p>                                                 | <p>OR = 0.95<br/>95% CI = [0.78, 1.18]<br/>P = 0.64</p> <p><u>Pneumococcal</u><br/>Follow-up<br/>Group 1: 58/2079 (3%)<br/>Control: 39/2370 (2%)</p> <p>Follow-up<br/>OR = 1.72<br/>95% CI = [1.10, 2.62]<br/>P = 0.01</p>                                                                                                                                                                                                | <p>A small effect may have been due to increased sensitivity of GPs to preventive care affecting the care of control patients, or to other characteristics in setting, evaluation design, or intervention design. Information overload may also be a mitigating factor.</p>                                                                                                 |           |
| <p>Garcia-Aymerich et al. 2007 (240)</p> | <p>Design: RCT</p> <p>Group allocation: Experimental study with patients randomized to treatment and control groups.</p> <p>Follow-up period: 12 months</p> | <p>Number of patients: 113 patients</p> <p><u>Group 1</u><br/>Number of patients: 44<br/>Female/male: 11/33<br/>Age (mean(sd)): 72 (10)*</p> <p><u>Control group</u><br/>Number of patients: 69<br/>Female/male: 5/64<br/>Age (mean(sd)): 73 (9)*</p> <p><u>Eligibility criteria:</u><br/>COPD patients discharged from a particular tertiary care hospital. All patients had been admitted because of an acute exacerbation, and had required hospitalization for more than 48 hours. Patients were excluded if they resided in a nursing home, or outside of study area; had lung cancer or advanced malignancies; faced logistic limitations; or suffered severe neurological or cardiovascular co-morbidities.</p> <p>* Age reported for patients</p> | <p>Number of sites: 1 department of pulmonary medicine at an academic tertiary care center</p> <p>Site affiliation: University</p> <p>Number of practices or physicians: General practices were involved in the provision of care. Numbers were not reported.</p> <p>Location: Spain (Barcelona)</p> | <p><u>Integrated COPD care vs usual care</u><br/>Intervention aim: Improve COPD care<br/>QI agent: Academic department of pulmonary medicine</p> <p><u>Group 1</u><br/>Case management: Patients received a comprehensive assessment at discharge, including evaluation of comorbidities, treatment adherence, and social support needs. An individually tailored care plan was developed between the patient, the case manager, and the primary care team. Patients were coached through logistical and social support issues associated with managing multiple chronic conditions. Additionally, patients were taught to identify symptoms or signs of an acute episode, and to call the case manager who could either solve the problem over the phone or initiate a home visit. No further visits were initiated by the case manager. Patients could initiate contact by telephone, or through a web based call center.</p> | <p><u>Influenza</u><br/>Proportion of eligible patients receiving vaccination</p> <p>Odds ratio of receiving vaccination between treatment and control groups</p> <p><u>Pneumococcal</u><br/>Proportion of eligible patients receiving vaccinations</p> <p>Odds ratio of receiving vaccination between treatment and control groups</p> | <p><u>Influenza</u><br/>Follow-up*<br/>Group 1: 19/21 (91%)<br/>Control: 32/41 (78%)</p> <p>Follow-up<br/>OR = 2.67<br/>P = 0.442</p> <p><u>Pneumococcal</u><br/>Follow-up*<br/>Group 1: 16/21 (76%)<br/>Control: 25/41 (61%)</p> <p>Follow-up<br/>OR = 2.05<br/>P = 0.348</p> <p>* Study completion rates were 53% and 60% among treatment and control patients. Results reported for patients completing the study.</p> | <p>Integrated care, including self-management education, coordination among levels of care, and increased accessibility in COPD patients, was associated with improvements in disease knowledge, treatment adherence, and nutritional status.</p> <p>No significant changes in lifestyle variables, medical treatment, lung function, or quality of life were detected.</p> | <p>23</p> |

Online Supplementary Data

http://www.annfammed.org/content/10/6/538/DC1

|                               |                                                                                                                                                                               |                                                                                                                                                                                                                                                                                                                                                                                                            |                                                                                                                                                                                                                                                             |                                                                                                                                                                                                                                                                                                                                                                                                                                                                                                                                                                                                                       |                                                                                                                                                                                                                |                                                                                                                                                                                                                                                                                                |                                                                                                                                                                                                                                                                                                                                          |    |
|-------------------------------|-------------------------------------------------------------------------------------------------------------------------------------------------------------------------------|------------------------------------------------------------------------------------------------------------------------------------------------------------------------------------------------------------------------------------------------------------------------------------------------------------------------------------------------------------------------------------------------------------|-------------------------------------------------------------------------------------------------------------------------------------------------------------------------------------------------------------------------------------------------------------|-----------------------------------------------------------------------------------------------------------------------------------------------------------------------------------------------------------------------------------------------------------------------------------------------------------------------------------------------------------------------------------------------------------------------------------------------------------------------------------------------------------------------------------------------------------------------------------------------------------------------|----------------------------------------------------------------------------------------------------------------------------------------------------------------------------------------------------------------|------------------------------------------------------------------------------------------------------------------------------------------------------------------------------------------------------------------------------------------------------------------------------------------------|------------------------------------------------------------------------------------------------------------------------------------------------------------------------------------------------------------------------------------------------------------------------------------------------------------------------------------------|----|
|                               |                                                                                                                                                                               | <p>completing the study only.</p> <p>** Denominator of the pneumococcal vaccination outcome may included patients with previous vaccinations.</p>                                                                                                                                                                                                                                                          |                                                                                                                                                                                                                                                             | <p>Patient education / reminders: A 2 hour educational session covering self-management of COPD was administered at discharge by the study nurse. Topics included knowledge of the disease, smoking cessation, physical activity, nutrition, non-pharmacologic therapy, correct use of pharmacological therapy, and self-management strategies for coping with exacerbations.</p> <p>Team change: Case management was provided by specially trained respiratory care nurses. Additionally, a joint visit of the specialist nurse and the primary care team was made</p> <p><u>Control group</u></p> <p>Usual care</p> |                                                                                                                                                                                                                |                                                                                                                                                                                                                                                                                                |                                                                                                                                                                                                                                                                                                                                          |    |
| Goebel et al., 2005 (241)     | <p>Design: Cluster RCS</p> <p>Group allocation: Physician practices allocated to treatment and control arms by physician self-selection.</p> <p>Follow-up period: 4 years</p> | <p>Number of patients: 1796</p> <p><u>Group 1</u><br/>Number of patients: 912<br/>Female/male: 693/219<br/>Age (mean(sd)): 79 (sd not reported)</p> <p><u>Control group</u><br/>Number of patients: 884<br/>Female/male: 510/374<br/>Age (mean(sd)): 74 (sd not reported)</p> <p><u>Eligibility criteria:</u><br/>Patients aged 65 years or older treated by an attending physician at the study site.</p> | <p>Number of sites: 1<br/>University ambulatory care center</p> <p>Site affiliation: University</p> <p>Number of practices or physicians: 4 attending physicians (2 treatment practices, 2 control practices)</p> <p>Location: United States (Virginia)</p> | <p><u>Standing orders for nurse vaccination vs usual care</u></p> <p>Intervention aim: Improve vaccination rates<br/>QI agent: Physician practices</p> <p><u>Group 1</u></p> <p>Team change: Nurses were tasked with providing influenza vaccinations. Physicians issued verbal or written standing orders to their nurses to administer the influenza vaccine.</p> <p><u>Control group</u></p> <p>Usual care</p>                                                                                                                                                                                                     | <p><u>Influenza</u><br/>Proportion of eligible patients receiving vaccination</p> <p>Odds ratio of receiving vaccination between treatment and control groups</p> <p><u>Pneumococcal</u><br/>Not targeted.</p> | <p><u>Influenza</u><br/>Follow-up*:**<br/>Group 1: 575/912 (63%)<br/>Control: 336/884 (38%)</p> <p>Follow-up*:**<br/>OR = 2.78<br/>P &lt; 0.0001</p> <p><u>Pneumococcal</u><br/>Not targeted.</p> <p>* Combined over 4 years.<br/>** Unadjusted for baseline imbalances in age and gender.</p> | <p>Standing orders for influenza vaccination are associated with higher immunization rates in the ambulatory setting.</p> <p>Results may be biased by imbalances in covariates among patient samples between groups, as well as differences in clinician or practice characteristics between the small number of practices involved.</p> | 21 |
| Grabenstein et al. 1993 (242) | <p>Design: RCT</p> <p>Group allocation: Patients were randomly allocated to treatment and control groups.</p> <p>Follow-up period:</p>                                        | <p>Number of patients: 551 (482 patients available at analysis, enumerated below.)</p> <p><u>Group 1</u><br/>Number of patients: 242<br/>Female/male: 152/90<br/>Age (mean(sd)): 66.9 (13.7)</p>                                                                                                                                                                                                           | <p>Number of sites: 3 pharmacies belonging to 1 pharmacy chain.</p> <p>Site affiliation: Private community pharmacies</p> <p>Number of practices or physicians: 3 pharmacies,</p>                                                                           | <p><u>Vaccination advocacy by community pharmacists via patient education letters vs usual care</u></p> <p>Intervention aim: Improve vaccination rates<br/>QI agent: Community pharmacies</p> <p><u>Group 1</u></p>                                                                                                                                                                                                                                                                                                                                                                                                   | <p><u>Influenza</u><br/>Proportion of eligible patients receiving vaccination</p> <p>Odds ratio of receiving vaccination between treatment and control groups</p>                                              | <p><u>Influenza</u><br/>Follow-up<br/>Group 1: 39/125 (31%)<br/>Control: 24/134 (18%)</p> <p>Follow-up<br/>OR = 1.70<br/>P = 0.013</p>                                                                                                                                                         | <p>Community pharmacists improved vaccination rates by advising at-risk patients of infection risk and describing where to be vaccinated.</p>                                                                                                                                                                                            | 22 |

Online Supplementary Data

http://www.annfammed.org/content/10/6/538/DC1

|                               |                                                                                                                                                                             |                                                                                                                                                                                                                                                                                                                                                                                                                                                                                                                                                                                                                                                                                                                                                                                            |                                                                                                                                                                                                                                                                                                                                              |                                                                                                                                                                                                                                                                                                                                                                                                                                                                                                                                                                                                                                                        |                                                                                                                                                                                                                                                                                    |                                                                                                                                                                                                                                                                                                                                                                  |                                                                                                                                                                                                                                                                                                                                                                                                                                                                                                                                                                         |    |
|-------------------------------|-----------------------------------------------------------------------------------------------------------------------------------------------------------------------------|--------------------------------------------------------------------------------------------------------------------------------------------------------------------------------------------------------------------------------------------------------------------------------------------------------------------------------------------------------------------------------------------------------------------------------------------------------------------------------------------------------------------------------------------------------------------------------------------------------------------------------------------------------------------------------------------------------------------------------------------------------------------------------------------|----------------------------------------------------------------------------------------------------------------------------------------------------------------------------------------------------------------------------------------------------------------------------------------------------------------------------------------------|--------------------------------------------------------------------------------------------------------------------------------------------------------------------------------------------------------------------------------------------------------------------------------------------------------------------------------------------------------------------------------------------------------------------------------------------------------------------------------------------------------------------------------------------------------------------------------------------------------------------------------------------------------|------------------------------------------------------------------------------------------------------------------------------------------------------------------------------------------------------------------------------------------------------------------------------------|------------------------------------------------------------------------------------------------------------------------------------------------------------------------------------------------------------------------------------------------------------------------------------------------------------------------------------------------------------------|-------------------------------------------------------------------------------------------------------------------------------------------------------------------------------------------------------------------------------------------------------------------------------------------------------------------------------------------------------------------------------------------------------------------------------------------------------------------------------------------------------------------------------------------------------------------------|----|
|                               | 2 months                                                                                                                                                                    | <p><u>Control group</u><br/>Number of patients: 240<br/>Female/male: 159/81<br/>Age (mean(sd)): 67.8 (14.6)</p> <p><u>Eligibility criteria:</u><br/>Patients fell into two sets: Those receiving one of ten medications in the preceding six months from the study pharmacies. Medications were digoxin or nitroglycerin (heart disease); insulin, glipizide, or glyburide (diabetes); and theophylline or salbutamol (chronic respiratory disease); or patients aged 65 years or older receiving ibuprofen, naproxen, or sulindac in the preceding six months. Patient pharmacy records were screened to exclude patients with chronic diseases from this set. Patients residing in a nursing home, or patients otherwise incapable of responding to letter or survey, were excluded.</p> | as above.<br><br>Location: United States (North Carolina)                                                                                                                                                                                                                                                                                    | <p>Patient education / reminders: Patients were mailed a letter on pharmacy stationery, advising them of their infection risk and of influenza vaccine availability. Letters were written in a manner consistent with the Health Beliefs Model, explaining influenza susceptibility and severity, vaccine efficacy, and providing information to mitigate barriers of fear or uncertainty. All patients, including control patients, also received a reminder postcard 2 weeks later.</p> <p><u>Control group</u><br/><br/>Patient education / reminders: Patients received a poison control pamphlet, as well as a vaccination reminder postcard.</p> | <u>Pneumococcal</u><br>Not targeted.                                                                                                                                                                                                                                               | <u>Pneumococcal</u><br>Not targeted.                                                                                                                                                                                                                                                                                                                             |                                                                                                                                                                                                                                                                                                                                                                                                                                                                                                                                                                         |    |
| Grabenstein et al. 2001 (243) | <p>Design: Cluster RCS</p> <p>Group allocation: Observational study with geographic regions (states) allocated to treatment or control.</p> <p>Follow-up period: 1 year</p> | <p>Number of patients: 4403*<br/>Female/male: 1212/878<br/>Age (mean(sd)): 64.8 (15.2)<br/>Group specific age and gender distributions not reported.</p> <p><u>Group 1</u><br/>Number of patients: 2211</p> <p><u>Control group</u><br/>Number of patients: 2192</p> <p><u>Eligibility criteria:</u><br/>Patients aged 65 years or older receiving any prescription medication, or patients 21 to 64 years old who received medications related to certain chronic diseases; medication was received from a participating pharmacy during</p>                                                                                                                                                                                                                                              | <p>Number of sites: 1 large chain of commercial pharmacies</p> <p>Site affiliation: Commercial pharmacies</p> <p>Number of practices or physicians: 24 pharmacies*</p> <p>Location: United States (Washington and Oregon)</p> <p>* US states were allocated to treatment (Washington state, 11 pharmacies) and control (Oregon state, 13</p> | <p><u>Pharmacist vaccination vs limited, single day, nurse-led pharmacy vaccination clinics</u></p> <p>Intervention aim: Improve vaccination rates<br/>QI agent: Commercial pharmacies</p> <p><u>Group 1</u><br/><br/>Team change: Pharmacists in commercial community pharmacies started identifying eligible patients and administering influenza vaccinations.</p> <p>Delivery site change: Patients were able to obtain vaccinations from pharmacists in commercial community pharmacies.</p> <p><u>Control group</u></p>                                                                                                                          | <p><u>Influenza</u><br/>Proportion of eligible patients receiving vaccination</p> <p>Mean between-group difference in change scores from baseline performance, treated as a continuous outcome for each pharmacy, <i>diff.</i> (mean (95% CI)).</p> <p>Odds ratio of receiving</p> | <p><u>Influenza</u><br/>Baseline<br/>All patients<br/>Group 1: 689/1004 (69%)<br/>Control: 806/1086 (74%)</p> <p>Follow-up<br/>All patients<br/>Group 1: 754/1004 (75%)<br/>Control: 800/1086 (74%)</p> <p>Follow-up<br/>Age <math>\geq</math> 65<br/>Diff. = +4.7% ([-4.5%, +13.9%])</p> <p>Age &lt; 65<br/>Diff. = +10.6% ([0.0%, 21.2%])</p> <p>Follow-up</p> | <p>Vaccine delivery by pharmacists was associated with a 10.6% higher influenza vaccination rate among respondents aged &lt;65 years who took medications for prolonged conditions, and a 10.8% higher rate among adult prescription recipients unvaccinated against influenza in the previous year.</p> <p>Vaccination rates for prescription recipients aged <math>\geq</math> 65 years increased only slightly. This may have been due to a ceiling effect.</p> <p>Pharmacists can identify and motivate pharmacy patrons at risk of influenza to be vaccinated.</p> | 15 |

Online Supplementary Data

http://www.annfammed.org/content/10/6/538/DC1

|                           |                                                                                                                                                                   |                                                                                                                                                                                                                                                     |                                                                                                                                                                                                                                                      |                                                                                                                                                                                                                                                                                                                                              |                                                                                                                                                                                                                                                                                                                     |                                                                                                                                                                                                                                                                                                                                                                                                                                                                                                                                                                                                                                   |                                                                                                                                                                                                                                                                                                                                  |    |
|---------------------------|-------------------------------------------------------------------------------------------------------------------------------------------------------------------|-----------------------------------------------------------------------------------------------------------------------------------------------------------------------------------------------------------------------------------------------------|------------------------------------------------------------------------------------------------------------------------------------------------------------------------------------------------------------------------------------------------------|----------------------------------------------------------------------------------------------------------------------------------------------------------------------------------------------------------------------------------------------------------------------------------------------------------------------------------------------|---------------------------------------------------------------------------------------------------------------------------------------------------------------------------------------------------------------------------------------------------------------------------------------------------------------------|-----------------------------------------------------------------------------------------------------------------------------------------------------------------------------------------------------------------------------------------------------------------------------------------------------------------------------------------------------------------------------------------------------------------------------------------------------------------------------------------------------------------------------------------------------------------------------------------------------------------------------------|----------------------------------------------------------------------------------------------------------------------------------------------------------------------------------------------------------------------------------------------------------------------------------------------------------------------------------|----|
|                           |                                                                                                                                                                   | <p>October 1998. Patients were excluded if they were living in a nursing home.</p> <p>* 4430 patients were identified by database. However, only 2090 patients responded. Statistics provided for responders only.</p>                              | <p>pharmacies) groups.</p>                                                                                                                                                                                                                           | <p>Delivery site change: Each pharmacy hosted vaccination nurses for a single day vaccination clinic during the Fall.</p>                                                                                                                                                                                                                    | <p>vaccination between treatment and control groups</p> <p>Proportion of patients not vaccinated at baseline, receiving vaccination at follow-up</p> <p>Odds ratio of receiving vaccination between treatment and control groups, among patients unvaccinated at baseline</p> <p>Pneumococcal<br/>Not targeted.</p> | <p>OR = 1.08<br/>P = 0.48</p> <p>Follow-up<br/>All patients unvaccinated at baseline<br/>Group 1: 111/315 (35%)<br/>Control: 67/146 (22%)</p> <p>Unvaccinated at baseline, age &gt;= 65<br/>Group 1: 51/141 (36%)<br/>Control: 24/107 (22%)</p> <p>Unvaccinated at baseline, aged &lt; 65<br/>Group 1: 60/174 (35%)<br/>Control: 43/173 (25%)</p> <p>Follow-up<br/>All patients unvaccinated at baseline*<br/>OR = 1.56<br/>P = 0.03</p> <p>Unvaccinated at baseline, age &gt;= 65*<br/>OR = 1.96<br/>P = 0.03</p> <p>Unvaccinated at baseline, age &lt; 65*<br/>OR = 1.62<br/>P = 0.05</p> <p>Pneumococcal<br/>Not targeted.</p> |                                                                                                                                                                                                                                                                                                                                  |    |
| Gutschi et al. 1998 (244) | <p>Design:<br/>CCT</p> <p>Group allocation:<br/>Experimental study with patients randomly allocated to treatment and control groups.</p> <p>Follow-up period:</p> | <p>Number of patients: 143 (135 patients were available at analysis, enumerated below.)</p> <p><u>Group 1</u><br/>Number of patients: 44<br/>Female/male: 9/35<br/>Age (mean(sd)): 59.6 (11.8)</p> <p><u>Group 2</u><br/>Number of patients: 44</p> | <p>Number of sites: 1 pharmaceutical services department of a large tertiary care hospital</p> <p>Site affiliation: University</p> <p>Number of practices or physicians: No particular community providers were involved <i>a priori</i> in this</p> | <p><u>Hospital pharmacist vaccination counseling vs hospital pharmacist vaccination counseling and letter for community pharmacists vs hospital pharmacist vaccination counseling and letters for community pharmacists and physicians</u></p> <p>Intervention aim: Improve vaccination rates<br/>QI agent: Hospital pharmacy department</p> | <p><u>Influenza</u><br/>Proportion of eligible patients receiving vaccination</p>                                                                                                                                                                                                                                   | <p><u>Influenza</u><br/>Baseline<br/>Control: 34%<br/>Group 1: 57%<br/>Group 2: 38%</p> <p>Follow-up<br/>Control: 29/44 (66%)<br/>Group 1: 35/44 (80%)<br/>Group 2: 33/47 (70%)</p>                                                                                                                                                                                                                                                                                                                                                                                                                                               | <p>The addition of follow-up letters addressed to family physicians and/or community pharmacists did not increase vaccination rates among high risk patients receiving vaccination counseling from hospital pharmacists.</p> <p>The follow-up letters may have been effective due to failure to enlist community health care</p> | 20 |



Online Supplementary Data

http://www.annfammed.org/content/10/6/538/DC1

|                                 |                                                                                                                                                                                                             |                                                                                                                                                                                                                                                                                                                                                                                                                            |                                                                                                                                                                                                              |                                                                                                                                                                                                                                                                                                                                                                                                                                                                                                                                                                                                                                                            |                                                                                                                                                                                                                                                      |                                                                                                                                                                                                                                                                                                                                                                                                                                                                                                |                                                                                                                                                                                                                                                                                                                                                                                                                              |           |
|---------------------------------|-------------------------------------------------------------------------------------------------------------------------------------------------------------------------------------------------------------|----------------------------------------------------------------------------------------------------------------------------------------------------------------------------------------------------------------------------------------------------------------------------------------------------------------------------------------------------------------------------------------------------------------------------|--------------------------------------------------------------------------------------------------------------------------------------------------------------------------------------------------------------|------------------------------------------------------------------------------------------------------------------------------------------------------------------------------------------------------------------------------------------------------------------------------------------------------------------------------------------------------------------------------------------------------------------------------------------------------------------------------------------------------------------------------------------------------------------------------------------------------------------------------------------------------------|------------------------------------------------------------------------------------------------------------------------------------------------------------------------------------------------------------------------------------------------------|------------------------------------------------------------------------------------------------------------------------------------------------------------------------------------------------------------------------------------------------------------------------------------------------------------------------------------------------------------------------------------------------------------------------------------------------------------------------------------------------|------------------------------------------------------------------------------------------------------------------------------------------------------------------------------------------------------------------------------------------------------------------------------------------------------------------------------------------------------------------------------------------------------------------------------|-----------|
|                                 | <p>3 months</p>                                                                                                                                                                                             | <p>Female/male: 6/38<br/>Age (mean(sd)): 62.0 (11.4)</p> <p><u>Group 3</u><br/>Number of patients: 47<br/>Female/male: 15/32<br/>Age (mean(sd)): 59.5 (11.1)</p> <p><u>Eligibility criteria:</u><br/>Patients had just been discharged after cardiac surgery at a university hospital.</p> <p><u>Exclusion:</u> Egg allergy, previous serious reaction to vaccine, receipt of both vaccines in the previous two years.</p> | <p>study</p> <p>Location: Canada (Ontario)</p>                                                                                                                                                               | <p><u>Group 1</u></p> <p>Patient education / reminders: A pharmacist assessed patients for, and counseled patients regarding the risks and benefits of influenza and pneumococcal vaccination.</p> <p>Clinician reminders: A follow-letter and pharmacy care plan was given to the patient and addressed to their community pharmacist.</p> <p><u>Group 2</u></p> <p>Patient education / reminders, as above.</p> <p>Clinician reminders: Follow-letters and pharmacy care plans were given to the patient and addressed to patients' community pharmacist and family physician.</p> <p><u>Control</u></p> <p>Patient education / reminders, as above.</p> | <p>Odds ratio of receiving vaccination between treatment and control groups</p> <p><u>Pneumococcal</u><br/>Proportion of eligible patients receiving vaccination</p> <p>Odds ratio of receiving vaccination between treatment and control groups</p> | <p>Test of overall significance<br/>P = 0.347</p> <p>Follow-up<br/>Group 1<br/>OR = 2.01<br/>P = 0.23</p> <p>Group 2<br/>OR = 1.22<br/>P = 0.82</p> <p><u>Pneumococcal</u><br/>Baseline<br/>Control: 14%<br/>Group 1: 14%<br/>Group 2: 11%</p> <p>Follow-up<br/>Control: 19/44 (43%)<br/>Group 1: 16/44 (36%)<br/>Group 2: 22/47 (47%)</p> <p>Overall test of significance<br/>P = 0.594</p> <p>Follow-up<br/>Group 1<br/>OR = 0.75<br/>P = 0.66</p> <p>Group 2<br/>OR = 1.16<br/>P = 0.83</p> | <p>providers. Community pharmacists, for example, often refused to accept the follow-up letter.</p>                                                                                                                                                                                                                                                                                                                          |           |
| <p>Harari et al. 2008 (245)</p> | <p>Design:<br/>RCT</p> <p>Group allocation:<br/>Experimental study, with patients randomly allocated to treatment or control groups. Patients from the same household were allocated to the same group.</p> | <p>Number of patients: 2503 (2006 patients were available for analysis, enumerated below.)</p> <p><u>Group 1</u><br/>Number of patients: 940<br/>Female/male: 526/414<br/>Age (mean(sd)): 74.7(6.3)</p> <p><u>Control group</u><br/>Number of patients: 1066<br/>Female/male: 564/502<br/>Age (mean(sd)): 74.2 (6.0)</p>                                                                                                   | <p>Number of sites: 3 computerized GP practices</p> <p>Site affiliation: Private practices</p> <p>Number of practices or physicians: 18 general practitioners *</p> <p>Location: United Kingdom (London)</p> | <p><u>Comprehensive patient health risk survey leading to computer generated patient and GP feedback vs usual care</u></p> <p>Intervention aim: Improve preventive care<br/>QI agent: Medical clinics</p> <p><u>Group 1</u></p> <p>Patient education / reminders: Patients were mailed a questionnaire (HRA-O) comprised of sections on health behavior, preventive care uptake, and</p>                                                                                                                                                                                                                                                                   | <p><u>Influenza</u><br/>Proportion of eligible patients receiving vaccination</p> <p>Odds ratio of receiving vaccination between treatment and control groups</p>                                                                                    | <p><u>Influenza</u><br/>Follow-up<br/>Group 1: 788/939 (84%)<br/>Control: 916/1066 (86%)<br/>Non-participating site: 65%</p> <p>Follow-up<br/>Group 1 vs control<br/>OR = 0.8<br/>P = 0.12<br/>Group 1 vs non-participating site<br/>P &lt; 0.0001</p>                                                                                                                                                                                                                                         | <p>Integration of an evidence-based delivery instrument (HRA-O) for the promotion of health in older people into the current IT driven system of three British primary care group practice did not improve self-reported health risk variables over 12 months, other than increased pneumococcal vaccination take-up.</p> <p>The authors suggest that contamination may have obscured the intervention effect, since all</p> | <p>20</p> |

Online Supplementary Data

http://www.annfammed.org/content/10/6/538/DC1

|                          |                                                                                                                                                            |                                                                                                                                                                                                                                               |                                                                                                                                                                                            |                                                                                                                                                                                                                                                                                                                                                                                                                                                                                                                                                                                                                                                                                                                                                                                                                                                                                                                                                                                                                                                                                                                                                                         |                                                                                                                                                              |                                                                                                                                                                                                                  |                                                                                                                                                                                                                                                                                                                      |    |
|--------------------------|------------------------------------------------------------------------------------------------------------------------------------------------------------|-----------------------------------------------------------------------------------------------------------------------------------------------------------------------------------------------------------------------------------------------|--------------------------------------------------------------------------------------------------------------------------------------------------------------------------------------------|-------------------------------------------------------------------------------------------------------------------------------------------------------------------------------------------------------------------------------------------------------------------------------------------------------------------------------------------------------------------------------------------------------------------------------------------------------------------------------------------------------------------------------------------------------------------------------------------------------------------------------------------------------------------------------------------------------------------------------------------------------------------------------------------------------------------------------------------------------------------------------------------------------------------------------------------------------------------------------------------------------------------------------------------------------------------------------------------------------------------------------------------------------------------------|--------------------------------------------------------------------------------------------------------------------------------------------------------------|------------------------------------------------------------------------------------------------------------------------------------------------------------------------------------------------------------------|----------------------------------------------------------------------------------------------------------------------------------------------------------------------------------------------------------------------------------------------------------------------------------------------------------------------|----|
|                          | Follow-up period:<br>1 year                                                                                                                                | <u>Eligibility criteria:</u><br>Patients aged 65 years or older. Patients were excluded if they were nursing home residents, required help with activities of daily living, had dementia, had a terminal illness, or could not speak English. | * Outcomes were measured at an additional, non-participating GP group practice with 8 practitioners to check for contamination.                                                            | self-reported health. Based on questionnaire results, patients were mailed individualized advice on modifying health risks, a preventive health checklist, sources of support, and other information. The 20-35 page individualized report was accompanied by a letter from the patient's practice, asking patients to discuss issues with their GP or practice nurse. Non-responders were issued a reminder card 6 months later.<br><br>Facilitated relay of clinical information: Information from the patient questionnaire was forwarded to GPs, who selected relevant data elements for entry into the patient's EMR.<br><br>Clinician reminders: The EMR was programmed to issue electronic prompts when the patient record was accessed, based on the health risks detected in the patient survey.<br><br>Clinician education: GPs and practice nurses participated in training and review sessions on current preventive care and health behavior recommendations.<br><br><u>Control group</u><br><br>Clinician education: GPs and practice nurses participated in training and review sessions on current preventive care and health behavior recommendations. | <u>Pneumococcal</u><br>Proportion of eligible patients receiving vaccination<br><br>Odds ratio of receiving vaccination between treatment and control groups | <u>Pneumococcal</u><br>Follow-up<br>Group 1: 308/939 (33%)<br>Control: 291/1066 (28%)<br><br>Follow-up<br>Group 1 vs control<br>OR = 1.2<br>P = 0.04<br>Group 1 vs non-participating site<br>P = non-significant | health care workers received preventive care education. This explanation is supported by much lower vaccination rates in the non-participating practice.<br><br>Supplementary reinforcement involving direct professional/patient follow-up contact may be necessary to achieve benefit.                             |    |
| Harris et al. 1990 (246) | Design: RCS<br><br>Group allocation: Patients self-selected into a group enrolled in continuous care, and an episodic consultative care group. Patients in | Number of patients: 112*<br>Female/male: 112/0<br>Age (mean): 65<br><br><u>Group 1</u><br>Number of patients: 62*<br>Female/male: 62/0<br><br><u>Control group</u><br>Number of patients: 50*                                                 | Number of sites: 1 university-based general medicine clinic<br><br>Site affiliation: University<br><br>Number of practices or physicians: 24 faculty physicians and 70 resident physicians | <u>Patients exposed to a computer clinician reminder system vs usual (episodic) care</u><br><br>Intervention aim: Improve preventive care<br>QI agent: Medical clinic<br><br><u>Group 1</u><br><br>Clinician reminders: Following patient                                                                                                                                                                                                                                                                                                                                                                                                                                                                                                                                                                                                                                                                                                                                                                                                                                                                                                                               | <u>Influenza</u><br>Proportion of eligible patients receiving vaccination<br><br>Odds ratio of receiving                                                     | <u>Influenza</u><br>Baseline* **<br>Group 1: 23/34 (68%)<br>Control: 22/71 (31%)<br><br>Follow-up ***<br>Group 1: 51/62 (83%)<br>Control: 15/50 (29%)<br><br>Follow-up ***                                       | Computer prompting appears to improve performance of preventive care procedures. However, the patient population was self-selected into intervention and control groups. Intervention patients had longer associations with the practice, visited the practice more frequently, and more high risk illnesses, all of | 14 |

Online Supplementary Data

http://www.annfammed.org/content/10/6/538/DC1

|                          |                                                                                                                                                                              |                                                                                                                                                                                                                                                                                                                                                                                                                                                                                                                                                                                                                                                                          |                                                                                                                                                                                                                                                   |                                                                                                                                                                                                                                                                                                                                                                                                                                                                                                                                                                                                                                                                                                                                                                                                           |                                                                                                                                                                                                                                 |                                                                                                                                                                                                                                                                                                                                                                                                                                                                                              |                                                                                                                                                                                                                                                                                                                                                                                                                                                   |    |
|--------------------------|------------------------------------------------------------------------------------------------------------------------------------------------------------------------------|--------------------------------------------------------------------------------------------------------------------------------------------------------------------------------------------------------------------------------------------------------------------------------------------------------------------------------------------------------------------------------------------------------------------------------------------------------------------------------------------------------------------------------------------------------------------------------------------------------------------------------------------------------------------------|---------------------------------------------------------------------------------------------------------------------------------------------------------------------------------------------------------------------------------------------------|-----------------------------------------------------------------------------------------------------------------------------------------------------------------------------------------------------------------------------------------------------------------------------------------------------------------------------------------------------------------------------------------------------------------------------------------------------------------------------------------------------------------------------------------------------------------------------------------------------------------------------------------------------------------------------------------------------------------------------------------------------------------------------------------------------------|---------------------------------------------------------------------------------------------------------------------------------------------------------------------------------------------------------------------------------|----------------------------------------------------------------------------------------------------------------------------------------------------------------------------------------------------------------------------------------------------------------------------------------------------------------------------------------------------------------------------------------------------------------------------------------------------------------------------------------------|---------------------------------------------------------------------------------------------------------------------------------------------------------------------------------------------------------------------------------------------------------------------------------------------------------------------------------------------------------------------------------------------------------------------------------------------------|----|
|                          | <p>the former group were subject to the intervention.</p> <p>Follow-up period: 12 months</p>                                                                                 | <p>Female male: 50/0</p> <p><u>Eligibility criteria:</u> Women aged 50 years or older, who had visited the practice at least twice in the preceding year. Men were excluded.</p> <p>* This study analyzed before and after cross-sectional samples of patients. During the follow-up period, 150 patients were eligible for all preventive care activities, of which 112 patients were eligible for influenza vaccination.</p>                                                                                                                                                                                                                                           | <p>Location: United States (North Carolina)</p>                                                                                                                                                                                                   | <p>enrollment, a specially trained nurse reviewed patients' medical records for past performance of recommended preventive care procedures. Clerical personnel entered the nurse's review information into the practice computerized mini-medical record. On subsequent patient visits, a computer-generated encounter form automatically listed "due" procedures.</p> <p><u>Control group</u></p> <p>Usual care, i.e.: episodic consultations with clinic physicians.</p>                                                                                                                                                                                                                                                                                                                                | <p>vaccination between treatment and control groups</p> <p><u>Pneumococcal</u><br/>Proportion of eligible patients receiving vaccination (period of surveillance)</p>                                                           | <p>OR = 10.82<br/>P &lt; 0.001</p> <p><u>Pneumococcal</u><br/>Baseline* **<br/>Group 1: 5/18 (29%)<br/>Control: 4/39 (10%)</p> <p>Follow-up ***<br/>Group 1: 11/33 (33%)<br/>Control: 0/25 (0%)</p> <p>Follow-up***<br/>OR = 25<br/>P = 0.001</p> <p>*, **, and *** notes: See next column.</p>                                                                                                                                                                                              | <p>which are predictors of vaccination. This study suffers high risk of bias.</p> <p>* Baseline results were reported for a period during which a nurse reminder system had been implemented.<br/>** Numerous patients crossed between groups during the study period.<br/>*** Covariates known to be predictive of vaccination varied significantly between groups. ORs calculated by present reviewers, by substituting 0.5 for zero cells.</p> |    |
| Harris et al. 2009 (247) | <p>Design: CBA</p> <p>Group allocation: Two geographic regions in metropolitan Adelaide were allocated to treatment and control arms.</p> <p>Follow-up period: 12 months</p> | <p>Number of patients: 249</p> <p><u>Group 1</u><br/>Number of patients: 125<br/>Female/male: 56/69<br/>Age (mean(sd)): 73.6 (sd not reported)</p> <p><u>Control group</u><br/>Number of patients: 124<br/>Female/male: 59/65<br/>Age (mean(sd)): 73.1 (sd not reported)</p> <p><u>Eligibility criteria:</u> Patients discharged from hospital for COPD or attending respiratory outpatient clinics for COPD, with moderate to severe disease according to the Global Initiative for Chronic Obstructive Lung Disease (GOLD) criteria.</p> <p><u>Exclusions:</u> Lung cancer, dementia, other major or unstable illness, inability to read English or lack of access</p> | <p>Number of sites: One university research group delivered the intervention in 2 metropolitan areas</p> <p>Site affiliation: University</p> <p>Number of practices or physicians: Not reported.</p> <p>Location: Australia (South Australia)</p> | <p><u>Patient-held evidence-based care manual vs usual care with a COPD information pamphlet</u></p> <p>Intervention aim: Improve COPD care<br/>QI agent: University research team</p> <p><u>Group 1</u></p> <p>Patient education / reminders: Patients were provided with a manual summarizing Cochrane reviews of evidence about COPD treatments, along with additional background information. Text was delivered in plain language, small page size, large print, question-and-answer format, and with illustrations. Tips or suggests regarding questions patients could ask of their physicians were also provided.</p> <p><u>Control group</u></p> <p>Usual care, with patients receiving a single sheet foldout pamphlet covering numerous COPD topics without referencing research evidence.</p> | <p><u>Influenza</u><br/>Proportion of eligible patients receiving vaccination at baseline</p> <p>Change in proportion of eligible patients receiving vaccination from baseline</p> <p><u>Pneumococcal</u><br/>Not targeted.</p> | <p><u>Influenza</u><br/>Baseline<br/>Group 1: 110/125 (88%)<br/>Control: 108/124 (87%)</p> <p>Follow-up<br/>Patients above median SES<br/>Group 1: +7%<br/>Control: -1%<br/>P = 0.83*</p> <p>Patients below median SES<br/>Group 1: +7%<br/>Control: +5%<br/>P = 0.98*</p> <p><u>Pneumococcal</u><br/>Not targeted.</p> <p>* Calculated from ANCOVA on the change scores, with adjustment for baseline performance and a propensity score derived from baseline patient characteristics.</p> | <p>Providing summaries of evidence to COPD patients did not lead to improved application of evidence in medical care. Lack of an effect may have been due to deployment of a COPD pamphlet among control patients, which provided similar recommendations and coverage of content, without referencing research support.</p>                                                                                                                      | 20 |

|                                 |                                                                                                                                                                                      |                                                                                                                                                                                                                                                                                                                                                                                                                                                                                                                                                                                                                                                                                                                              |                                                                                                                                                                                                                                                                                                                                                                                     |                                                                                                                                                                                                                                                                                                                                                                                                                                                                                                                                                                                                                                                                                                                                                                                                                                                                                                                                                                                                                                                                                                                                                                                                                                                         |                                                                                                                                                                                                                                                                                                                                        |                                                                                                                                                                                                                                                                                                                                                                                                                                                                                                                                                                                                                                                                                                                                                                                                                                                                                                                                            |                                                                                                                                                                                                                                                                                                                                                                                                                                                                                                                                                                                                                                                                                                                                                                                                                                                                                                                                                                                                                                                                                                                              |           |
|---------------------------------|--------------------------------------------------------------------------------------------------------------------------------------------------------------------------------------|------------------------------------------------------------------------------------------------------------------------------------------------------------------------------------------------------------------------------------------------------------------------------------------------------------------------------------------------------------------------------------------------------------------------------------------------------------------------------------------------------------------------------------------------------------------------------------------------------------------------------------------------------------------------------------------------------------------------------|-------------------------------------------------------------------------------------------------------------------------------------------------------------------------------------------------------------------------------------------------------------------------------------------------------------------------------------------------------------------------------------|---------------------------------------------------------------------------------------------------------------------------------------------------------------------------------------------------------------------------------------------------------------------------------------------------------------------------------------------------------------------------------------------------------------------------------------------------------------------------------------------------------------------------------------------------------------------------------------------------------------------------------------------------------------------------------------------------------------------------------------------------------------------------------------------------------------------------------------------------------------------------------------------------------------------------------------------------------------------------------------------------------------------------------------------------------------------------------------------------------------------------------------------------------------------------------------------------------------------------------------------------------|----------------------------------------------------------------------------------------------------------------------------------------------------------------------------------------------------------------------------------------------------------------------------------------------------------------------------------------|--------------------------------------------------------------------------------------------------------------------------------------------------------------------------------------------------------------------------------------------------------------------------------------------------------------------------------------------------------------------------------------------------------------------------------------------------------------------------------------------------------------------------------------------------------------------------------------------------------------------------------------------------------------------------------------------------------------------------------------------------------------------------------------------------------------------------------------------------------------------------------------------------------------------------------------------|------------------------------------------------------------------------------------------------------------------------------------------------------------------------------------------------------------------------------------------------------------------------------------------------------------------------------------------------------------------------------------------------------------------------------------------------------------------------------------------------------------------------------------------------------------------------------------------------------------------------------------------------------------------------------------------------------------------------------------------------------------------------------------------------------------------------------------------------------------------------------------------------------------------------------------------------------------------------------------------------------------------------------------------------------------------------------------------------------------------------------|-----------|
| <p>Herman et al. 1994 (248)</p> | <p>Design:<br/>Cluster-RCT</p> <p>Group allocation:<br/>Experimental study with practice groups allocated to treatment and control groups.</p> <p>Follow-up period:<br/>6 months</p> | <p>Number of patients: 1202</p> <p><u>Group 1</u><br/>Number of patients: 387<br/>Female/male: 261/126<br/>Age (mean(sd)): 72.9 (6.1)</p> <p><u>Group 2</u><br/>Number of patients: 389<br/>Female/male: 278/111<br/>Age (mean(sd)): 73.8 (6.6)</p> <p><u>Control</u><br/>Number of patients: 426<br/>Female/male: 293/133<br/>Age (mean(sd)): 73.5 (6.6)</p> <p><u>Eligibility criteria:</u><br/>Clinic patients aged 65 years or older attending the ambulatory medicine clinic for any visit between October 1, 1989 and March 31, 1990; seen by the resident physician, a nurse practitioner, or a nurse for either a medication refill or education visit.</p> <p><u>Exclusion:</u> Contraindication to vaccination</p> | <p>Number of sites: 1 outpatient general medicine clinic at a major public hospital affiliated with an academic school</p> <p>Site affiliation: University</p> <p>Number of practices or physicians: 3 practice groups, each with 21 to 23 residents, 1 nurse, and 1 nurse practitioner. Residents had been randomly allocated to groups.</p> <p>Location: United States (Ohio)</p> | <p><u>Preventive team care with patient educational materials vs patient educational materials only vs usual care</u></p> <p>Intervention aim: Improve vaccination rates<br/>QI agent: Medical clinics</p> <p><u>Group 1</u><br/>Clinician education: All study providers were provided with educational materials and opportunities for attendance at lectures on preventive services for the older patient. Materials consisted of background papers and succinct guidelines related to routine preventive services.</p> <p>Patient education / reminders:<br/>Educational materials were given to patients by the nurse at each clinic visit. Nurses provided the National Institute on Aging's <i>Age Page</i> "Shots for Safety", as well as material from the Ohio Department of Health recommending annual vaccination.</p> <p>Team change: A protocol was developed to allow nurses to vaccinate patients before they were seen by the physician or nurse practitioner. A health maintenance flow sheet was attached to each patient's chart and updated during the study period.</p> <p><u>Group 2</u><br/>Clinician education and patient education / reminders, as above.</p> <p><u>Control group</u><br/>Clinician education, as above.</p> | <p><u>Influenza</u><br/>Proportion of eligible patients receiving vaccination</p> <p>Odds ratio of receiving vaccination between treatment and control groups</p> <p><u>Pneumococcal</u><br/>Proportion of eligible patients receiving vaccination</p> <p>Odds ratio of receiving vaccination between treatment and control groups</p> | <p><u>Influenza</u><br/>Baseline*<sup>***</sup><br/>Group 1: 76/243 (31%)<br/>Group 2: 113/242 (47%)<br/>Control: 93/271 (34%)</p> <p>Follow-up*<sup>***</sup><br/>Group 1: 134/243 (55%)<br/>Group 2: 108/242 (45%)<br/>Control: 113/271 (42%)</p> <p>Follow-up<sup>†</sup><br/>Group 1 vs Control<br/>OR = 1.72<br/>P &lt; 0.001</p> <p>Group 2 vs Control<br/>OR = 1.23<br/>P = Not significant</p> <p>Group 1 vs Group 2<br/>OR = 1.53<br/>P = 0.001</p> <p><u>Pneumococcal</u><br/>Baseline<br/>Group 1: 73/387 (19%)<br/>Group 2: 97/389 (25%)<br/>Group 3: 131/426 (31%)</p> <p>Follow-up<sup>**</sup><sup>***</sup><br/>Group 1: 68/314 (22%)<br/>Group 2: 15/292 (5%)<br/>Control: 10/295 (3%)</p> <p>Follow-up<sup>†</sup><br/>Group 1 vs Control<br/>OR = not reported<br/>P = 0.001</p> <p>Group 2 vs Control<br/>OR = not reported<br/>P = not significant</p> <p>Group 1 vs Group 2<br/>OR = Not reported<br/>P = 0.0001</p> | <p>Vaccination rates improved statistically and clinically significantly for influenza and pneumococcal vaccination in the clinical team offering preventive team care. Using standing orders, the clinic nurses doubled the rates of immunizations.</p> <p>Patient education did not increase vaccination rates over provider education alone.</p> <p>The rates at which eligible patients were offered vaccination were still low compared with national targets. Patient refusal of vaccination was also higher in the team care intervention group.</p> <p>* Denominator composed of patients who had attended the practice during 2 consecutive influenza seasons, i.e.: baseline and intervention periods. Covariate distribution is similar to that of the overall sample.</p> <p>** Denominator composed of patients without previous pneumococcal vaccination.</p> <p>***Statistically significant racial imbalances detected between groups.</p> <p>† From logistic regression analyses adjusted for baseline vaccination history, age, gender, race, physician's level of training, or physician's attitudes.</p> | <p>24</p> |
|---------------------------------|--------------------------------------------------------------------------------------------------------------------------------------------------------------------------------------|------------------------------------------------------------------------------------------------------------------------------------------------------------------------------------------------------------------------------------------------------------------------------------------------------------------------------------------------------------------------------------------------------------------------------------------------------------------------------------------------------------------------------------------------------------------------------------------------------------------------------------------------------------------------------------------------------------------------------|-------------------------------------------------------------------------------------------------------------------------------------------------------------------------------------------------------------------------------------------------------------------------------------------------------------------------------------------------------------------------------------|---------------------------------------------------------------------------------------------------------------------------------------------------------------------------------------------------------------------------------------------------------------------------------------------------------------------------------------------------------------------------------------------------------------------------------------------------------------------------------------------------------------------------------------------------------------------------------------------------------------------------------------------------------------------------------------------------------------------------------------------------------------------------------------------------------------------------------------------------------------------------------------------------------------------------------------------------------------------------------------------------------------------------------------------------------------------------------------------------------------------------------------------------------------------------------------------------------------------------------------------------------|----------------------------------------------------------------------------------------------------------------------------------------------------------------------------------------------------------------------------------------------------------------------------------------------------------------------------------------|--------------------------------------------------------------------------------------------------------------------------------------------------------------------------------------------------------------------------------------------------------------------------------------------------------------------------------------------------------------------------------------------------------------------------------------------------------------------------------------------------------------------------------------------------------------------------------------------------------------------------------------------------------------------------------------------------------------------------------------------------------------------------------------------------------------------------------------------------------------------------------------------------------------------------------------------|------------------------------------------------------------------------------------------------------------------------------------------------------------------------------------------------------------------------------------------------------------------------------------------------------------------------------------------------------------------------------------------------------------------------------------------------------------------------------------------------------------------------------------------------------------------------------------------------------------------------------------------------------------------------------------------------------------------------------------------------------------------------------------------------------------------------------------------------------------------------------------------------------------------------------------------------------------------------------------------------------------------------------------------------------------------------------------------------------------------------------|-----------|

Online Supplementary Data

http://www.annfammed.org/content/10/6/538/DC1

|                                 |                                                                                                                                                 |                                                                                                                                                                                                                                                                                                                                                                                                                                                                                                                                                                                                            |                                                                                                                                                                                          |                                                                                                                                                                                                                                                                                                                                                                                                                                                                                                                                                                                                                                                                                                                                                                                                                                                                                                                                                                                                                                                                                                                                                                                      |                                                                                                                                                                                                                                                                                                                                        |                                                                                                                                                                                                                                                                            |                                                                                                                                                                                                                                                                                                                                                                                                                                                                                                                                                                                                                      |           |
|---------------------------------|-------------------------------------------------------------------------------------------------------------------------------------------------|------------------------------------------------------------------------------------------------------------------------------------------------------------------------------------------------------------------------------------------------------------------------------------------------------------------------------------------------------------------------------------------------------------------------------------------------------------------------------------------------------------------------------------------------------------------------------------------------------------|------------------------------------------------------------------------------------------------------------------------------------------------------------------------------------------|--------------------------------------------------------------------------------------------------------------------------------------------------------------------------------------------------------------------------------------------------------------------------------------------------------------------------------------------------------------------------------------------------------------------------------------------------------------------------------------------------------------------------------------------------------------------------------------------------------------------------------------------------------------------------------------------------------------------------------------------------------------------------------------------------------------------------------------------------------------------------------------------------------------------------------------------------------------------------------------------------------------------------------------------------------------------------------------------------------------------------------------------------------------------------------------|----------------------------------------------------------------------------------------------------------------------------------------------------------------------------------------------------------------------------------------------------------------------------------------------------------------------------------------|----------------------------------------------------------------------------------------------------------------------------------------------------------------------------------------------------------------------------------------------------------------------------|----------------------------------------------------------------------------------------------------------------------------------------------------------------------------------------------------------------------------------------------------------------------------------------------------------------------------------------------------------------------------------------------------------------------------------------------------------------------------------------------------------------------------------------------------------------------------------------------------------------------|-----------|
| <p>Hermiz et al. 2002 (249)</p> | <p>Design: CCT</p> <p>Group allocation: Patients were randomly allocated to treatment and control groups.</p> <p>Follow-up period: 3 months</p> | <p>Number of patients: 177</p> <p><u>Group 1</u><br/>Number of patients: 84<br/>Female/male: 43/41<br/>Age (mean(sd)): 67.1 (sd not reported)</p> <p><u>Control group</u><br/>Number of patients: 93<br/>Female/male: 50/43<br/>Age (mean(sd)): 66.7 (sd not reported)</p> <p><u>Eligibility criteria:</u> Patients aged 30 to 80 years old, discharged to the community from emergency or in-patient care for COPD at the study hospital.<br/>Exclusions: Insufficient English speaking skills, resident in a nursing home, confused or demented, and resident outside the hospital catchment region.</p> | <p>Number of sites: 1 tertiary care hospital</p> <p>Site affiliation: University</p> <p>Number of practices or physicians: Not reported.</p> <p>Location: United Kingdom (Liverpool)</p> | <p><u>Home visits by community nurses after hospital discharge vs usual GP care</u></p> <p>Intervention aim: Improve care of COPD<br/>QI agent: Community nurses</p> <p><u>Group 1</u></p> <p>Team change: Community nurses provided two home visits per patient. The first occurred within a week of a patient's discharge from hospital, and included a health assessment, COPD education, problem identification and disease management advice. Nurses worked with patients to develop care plans documenting problem areas, education provided, and referral to other services. Care plans were mailed to each patient's GP. At the second visit, one month later, nurses reviewed patients' progress and need for further follow-up.</p> <p>Patient education: Nurses provided verbal and written education on COPD, smoking cessation, management of activities of daily living, exercise, drug use, health maintenance, and when to seek medical intervention.</p> <p>Case management: Community nurses set up care plans with patients, including referral to other services. An additional follow-up visit was provided.</p> <p><u>Control group</u></p> <p>Usual care.</p> | <p><u>Influenza</u><br/>Proportion of eligible patients receiving vaccination</p> <p>Odds ratio of receiving vaccination between treatment and control groups</p> <p><u>Pneumococcal</u><br/>Proportion of eligible patients receiving vaccination</p> <p>Odds ratio of receiving vaccination between treatment and control groups</p> | <p><u>Influenza</u><br/>Follow-up<br/>Group 1: 48/67 (72%)<br/>Control: 60/80 (75%)</p> <p>Follow-up<br/>OR = 0.84<br/>P = 0.65</p> <p><u>Pneumococcal</u><br/>Follow-up<br/>Group 1: 42/67 (63%)<br/>Control: 42/80 (53%)</p> <p>Follow-up<br/>OR = 1.52<br/>P = 0.28</p> | <p>Home follow-up by a community nurse of patients discharged from hospital after an acute exacerbation of COPD did not improve vaccination rates. Total functional status, use of the emergency department, GP visits, re-admission to hospital, and satisfaction also did not differ between groups during the follow-up period. Patient knowledge and some aspects of functional status improved.</p> <p>The ineffectiveness of the intervention may have been due to severe disease. Patients were selected from those requiring hospitalization, and 19/147 patients died during the 3 months of follow-up.</p> | <p>20</p> |
| <p>Hoey et al. 1982 (2)</p>     | <p>Design: CBA</p> <p>Group allocation: Mornings and afternoons at a large general medicine polyclinic were allocated to</p>                    | <p>Number of patients: 783<br/>Age / gender distributions not reported.</p> <p><u>Group 1</u><br/>Number of patients: 435</p> <p><u>Control group</u><br/>Number of patients: 348</p>                                                                                                                                                                                                                                                                                                                                                                                                                      | <p>Number of sites: 1 university-affiliated general medicine outpatient polyclinic</p> <p>Site affiliation: University</p> <p>Number of practices or physicians: Not reported.</p>       | <p><u>Nurse vaccinations vs usual care</u></p> <p>Intervention aim: Improve vaccination rates<br/>QI agent: Medical clinics</p> <p><u>Group 1</u></p> <p>Team change: Nurses reviewed patient charts for vaccination indications,</p>                                                                                                                                                                                                                                                                                                                                                                                                                                                                                                                                                                                                                                                                                                                                                                                                                                                                                                                                                | <p><u>Influenza</u><br/>Proportion of eligible patients receiving vaccination</p> <p>Odds ratio of receiving vaccination between treatment and control groups</p> <p><u>Pneumococcal</u></p>                                                                                                                                           | <p><u>Influenza</u><br/>Follow-up<br/>Group 1: 152/435 (35%)<br/>Control: 8/348 (2%)</p> <p>Follow-up<br/>OR = 22.83<br/>P &lt; 0.001*</p> <p><u>Pneumococcal</u></p>                                                                                                      | <p>Outpatient general medicine clinic nurses were able to vaccinate a substantial proportion of eligible patients. Vaccination rates may have been further improved if clinic nurses had more time.</p>                                                                                                                                                                                                                                                                                                                                                                                                              | <p>14</p> |

Online Supplementary Data

http://www.annfammed.org/content/10/6/538/DC1

|                               |                                                                                                                                                           |                                                                                                                                                                                                                                                                                                                                                                                                                                                                                                                                                                                                                                                                                                                                                                                                                                                                                                                                                                                                              |                                                                                                                                                                                              |                                                                                                                                                                                                                                                                                                                                                                                                                                                                                                                                                                                                                                                                                                                                                                                                                                                                                                                                                                       |                                                                                                                                                                                                                                                          |                                                                                                                                                                                                                                                                                                                                                                                                                                                                                                                                                                                                                                                                                                                                                                                                                                                                                                                                                                                                                                                                                                                    |                                                                                                                                                                                                                                                                                                            |           |
|-------------------------------|-----------------------------------------------------------------------------------------------------------------------------------------------------------|--------------------------------------------------------------------------------------------------------------------------------------------------------------------------------------------------------------------------------------------------------------------------------------------------------------------------------------------------------------------------------------------------------------------------------------------------------------------------------------------------------------------------------------------------------------------------------------------------------------------------------------------------------------------------------------------------------------------------------------------------------------------------------------------------------------------------------------------------------------------------------------------------------------------------------------------------------------------------------------------------------------|----------------------------------------------------------------------------------------------------------------------------------------------------------------------------------------------|-----------------------------------------------------------------------------------------------------------------------------------------------------------------------------------------------------------------------------------------------------------------------------------------------------------------------------------------------------------------------------------------------------------------------------------------------------------------------------------------------------------------------------------------------------------------------------------------------------------------------------------------------------------------------------------------------------------------------------------------------------------------------------------------------------------------------------------------------------------------------------------------------------------------------------------------------------------------------|----------------------------------------------------------------------------------------------------------------------------------------------------------------------------------------------------------------------------------------------------------|--------------------------------------------------------------------------------------------------------------------------------------------------------------------------------------------------------------------------------------------------------------------------------------------------------------------------------------------------------------------------------------------------------------------------------------------------------------------------------------------------------------------------------------------------------------------------------------------------------------------------------------------------------------------------------------------------------------------------------------------------------------------------------------------------------------------------------------------------------------------------------------------------------------------------------------------------------------------------------------------------------------------------------------------------------------------------------------------------------------------|------------------------------------------------------------------------------------------------------------------------------------------------------------------------------------------------------------------------------------------------------------------------------------------------------------|-----------|
|                               | <p>treatment and control groups.</p> <p>Follow-up period: 6 weeks</p>                                                                                     | <p><u>Eligibility criteria:</u> Patients attending the study polyclinic. Eligibility criteria for vaccination were not reported.</p>                                                                                                                                                                                                                                                                                                                                                                                                                                                                                                                                                                                                                                                                                                                                                                                                                                                                         | <p>Location: Canada (Quebec)</p>                                                                                                                                                             | <p>inquired about contraindications, administered vaccine, and checked inject sites after 20 minutes.</p> <p><u>Control group</u></p> <p>Usual care.</p>                                                                                                                                                                                                                                                                                                                                                                                                                                                                                                                                                                                                                                                                                                                                                                                                              | <p>Proportion of eligible patients receiving vaccination</p>                                                                                                                                                                                             | <p>Not targeted.</p> <p>* Calculated by present reviewers.</p>                                                                                                                                                                                                                                                                                                                                                                                                                                                                                                                                                                                                                                                                                                                                                                                                                                                                                                                                                                                                                                                     |                                                                                                                                                                                                                                                                                                            |           |
| <p>Hogg et al. 1998 (250)</p> | <p>Design: CCT</p> <p>Group allocation: Patients' families were randomly allocated to treatment and control groups.</p> <p>Follow-up period: 6 months</p> | <p>Number of patients: 1971 patients in 719 families</p> <p><u>Group 1</u><br/>                     Number of patients: 613<br/>                     Percent male per family (mean(sd)): 50.1% (24.6%)<br/>                     Age per family (mean(sd)): 37.5 (18.7)</p> <p><u>Group 1</u><br/>                     Number of patients: 676<br/>                     Percent male per family (mean(sd)): 47.7% (26.4%)<br/>                     Age per family (mean(sd)): 41.9 (19.8)</p> <p><u>Control group</u><br/>                     Number of patients: 682<br/>                     Percent male per family (mean(sd)): 47.7% (29.6%)<br/>                     Age per family (mean(sd)): 41.6 (18.9)</p> <p><u>Eligibility criteria:</u> Patients registered at the site for at least 1 year, who had attended the clinic at least once in the preceding 2 years. Patients eligible for influenza vaccination were aged 65 years or older, or had high-risk diseases (e.g.: COPD, diabetes).</p> | <p>Number of sites: 1 rural family medicine teaching clinic</p> <p>Site affiliation: University</p> <p>Number of practices or physicians: Not reported.</p> <p>Location: Canada (Quebec)</p> | <p><u>Customized preventive care reminder letters vs form letters vs usual care</u></p> <p>Intervention aim: Improve preventive care<br/>                     QI agent: Medical clinics</p> <p><u>Group 1</u></p> <p>Patient education / reminders: Computer-generated individualized letters were sent to patients reminding them of outstanding preventive care procedures. The tone of each letter was positive and nonthreatening. Letters included dates on which participants had last received the recommended procedures, and were generated from the computerized medical record.</p> <p><u>Group 2</u></p> <p>Patient education / reminders: Patients received a form letter outlining all the recommended preventive procedures for all ages and sexes. The letter was identical to the individualized letter received by patients in Group 1, except the date of previous procedures was not provided.</p> <p><u>Control group</u></p> <p>Usual care.</p> | <p><u>Influenza</u><br/>                     Proportion of eligible patients receiving vaccination</p> <p>Odds ratio of receiving vaccination between treatment and control groups</p> <p><u>Pneumococcal</u><br/>                     Not targeted.</p> | <p><u>Influenza</u><br/>                     Follow-up<br/>                     Patients aged 65 years or older<br/>                     Group 1: 6/30 (20%)<br/>                     Group 2: 8/48 (17%)<br/>                     Control: 9/47 (19%)<br/>                     P = 0.11</p> <p>Patients with chronic disease<br/>                     Group 1: 3/17 (18%)<br/>                     Group 2: 1/11 (9%)<br/>                     Group 3: 3/20 (15%)<br/>                     P = 0.75</p> <p>Follow-up<br/>                     Patients aged 65 years or older<br/>                     Group 1<br/>                     OR = 1.06<br/>                     P = 1.00<br/>                     Group 2<br/>                     OR = 0.84<br/>                     P = 0.79</p> <p>Patients with chronic disease<br/>                     Group 1<br/>                     OR = 1.21<br/>                     P = 1.00<br/>                     Group 2<br/>                     OR = 0.57<br/>                     P = 1.00</p> <p><u>Pneumococcal</u><br/>                     Not targeted.</p> | <p>No differences in influenza vaccination were detected between groups. However, taking all recommended preventive procedures together, those receiving the customized letters obtained more preventive procedures than patients in the control group, while those receiving the form letter did not.</p> | <p>21</p> |
| <p>Hull et al. 2002 (251)</p> | <p>Design: CCT</p>                                                                                                                                        | <p>Number of patients: 1261* patients from 1206 households</p>                                                                                                                                                                                                                                                                                                                                                                                                                                                                                                                                                                                                                                                                                                                                                                                                                                                                                                                                               | <p>Number of sites: 3 inner city general practices</p>                                                                                                                                       | <p><u>Telephone appointments scheduled by practice receptionists vs usual care</u></p>                                                                                                                                                                                                                                                                                                                                                                                                                                                                                                                                                                                                                                                                                                                                                                                                                                                                                | <p><u>Influenza</u><br/>                     Proportion of eligible patients receiving vaccination</p>                                                                                                                                                   | <p><u>Influenza</u><br/>                     Follow-up<br/>                     Group 1: 328/660 (50%)</p>                                                                                                                                                                                                                                                                                                                                                                                                                                                                                                                                                                                                                                                                                                                                                                                                                                                                                                                                                                                                         | <p>General practices can boost immunization rates for influenza vaccination among the fit older</p>                                                                                                                                                                                                        | <p>25</p> |

Online Supplementary Data

http://www.annfammed.org/content/10/6/538/DC1

|                              |                                                                                                                                                                            |                                                                                                                                                                                                                                                                                                                                                                                                                                                                                                                                                                                                                                                                         |                                                                                                                                                                                                                                                                |                                                                                                                                                                                                                                                                                                                                                                                                                                                                                                                                                                           |                                                                                                                                                                                                                                                                                                             |                                                                                                                                                                                                                                                                                                                                                                                                        |                                                                                                                                                                                                                                                                                                                                                                                                                                                                                                                                                                                                  |    |
|------------------------------|----------------------------------------------------------------------------------------------------------------------------------------------------------------------------|-------------------------------------------------------------------------------------------------------------------------------------------------------------------------------------------------------------------------------------------------------------------------------------------------------------------------------------------------------------------------------------------------------------------------------------------------------------------------------------------------------------------------------------------------------------------------------------------------------------------------------------------------------------------------|----------------------------------------------------------------------------------------------------------------------------------------------------------------------------------------------------------------------------------------------------------------|---------------------------------------------------------------------------------------------------------------------------------------------------------------------------------------------------------------------------------------------------------------------------------------------------------------------------------------------------------------------------------------------------------------------------------------------------------------------------------------------------------------------------------------------------------------------------|-------------------------------------------------------------------------------------------------------------------------------------------------------------------------------------------------------------------------------------------------------------------------------------------------------------|--------------------------------------------------------------------------------------------------------------------------------------------------------------------------------------------------------------------------------------------------------------------------------------------------------------------------------------------------------------------------------------------------------|--------------------------------------------------------------------------------------------------------------------------------------------------------------------------------------------------------------------------------------------------------------------------------------------------------------------------------------------------------------------------------------------------------------------------------------------------------------------------------------------------------------------------------------------------------------------------------------------------|----|
|                              | <p>Group allocation: Experimental study with households randomly allocated to treatment and control groups.</p> <p>Follow-up period: 2 months</p>                          | <p><u>Group 1</u><br/>Number of patients: Not reported<br/>Female/male: 53.9% female<br/>Age (mean(sd)): 69.2 (sd not reported)</p> <p><u>Control group</u><br/>Number of patients: Not reported<br/>Female/male: 53.3% female<br/>Age (mean(sd)): 69.3 (sd not reported)</p> <p><u>Eligibility criteria:</u><br/>Patients aged between 65 and 74 years. Patients with chronic disease, and those who had been subject to similar interventions in previous years were excluded.</p> <p>* Patient numbers in Hull et al. 2002 (251) are not internally consistent. Patients in the outcome denominators exceed total patients reported in the patient flow diagram.</p> | <p>Site affiliation: Private practices</p> <p>Number of practices or physicians: As above.</p> <p>Location: United Kingdom (East London and Essex)</p>                                                                                                         | <p>Intervention aim: Improve vaccination rates<br/>QI agent: Medical practices</p> <p><u>Group 1</u><br/>Patient education / reminders: Receptionists called households, recalling eligible patients to receive their flu vaccinations.</p> <p><u>Control group</u><br/>Usual care.</p>                                                                                                                                                                                                                                                                                   | <p>Odds ratio of receiving vaccination between treatment and control groups</p> <p><u>Pneumococcal</u><br/>Not targeted.</p>                                                                                                                                                                                | <p>Control: 288/658 (44%)</p> <p>Follow-up<br/>OR = 1.29*<br/>P = 0.026*</p> <p><u>Pneumococcal</u><br/>Not targeted.</p> <p>* Adjusted for clustering within clinic and households.</p>                                                                                                                                                                                                               | <p>population by about 6% using a telephone call from practice receptionists. This effect was achieved in addition to national and community advertising and mail campaigns.</p> <p>Costs of the intervention were estimated.</p>                                                                                                                                                                                                                                                                                                                                                                |    |
| Hutchison et al., 1989 (252) | <p>Design: CBA</p> <p>Group allocation: Similar Ontario HSOs were selected, by study investigators, to be treatment and control sites.</p> <p>Follow-up period: 1 year</p> | <p>Number of patients: 1211<br/>Age and gender not reported.</p> <p><u>Group 1</u><br/>Number of patients: 593</p> <p><u>Control group</u><br/>Number of patients: 618</p> <p><u>Eligibility criteria:</u> Patients aged 65 years or older, enrolled in the practice since September 1, 1982. Residents of long-term care facilities were excluded.</p>                                                                                                                                                                                                                                                                                                                 | <p>Number of sites: 2 Health Services Organizations (HSOs)*</p> <p>Site affiliation: Private community delivery system</p> <p>Number of practices or physicians: Not reported</p> <p>Location: Canada (Ontario)</p> <p>* 1 treatment site, 1 control site.</p> | <p><u>Computer-generated nurse/physician reminders vs usual care</u></p> <p>Intervention aim: Improve influenza vaccination rates<br/>QI agent: Health Services Organizations</p> <p><u>Group 1</u><br/>Clinician reminders: A nurse/physician reminder message was printed on the computer-generated encounter form for each eligible patient and attached to the front of the patient's chart. Patients who received or refused vaccine were deleted from the reminder system for the remainder of the intervention period.</p> <p><u>Control group:</u> Usual care</p> | <p><u>Influenza - All patients</u><br/>Proportion of eligible patients receiving vaccination during influenza season</p> <p>Percent increase 1984-85 to 1985-86</p> <p>Odds ratio of receiving vaccination between treatment and control groups</p> <p><u>Influenza - Patients with chronic disease</u></p> | <p><u>Influenza - All patients</u><br/>Baseline - 1984-85<br/>Group 1: 60/593 (10%)<br/>Control: 171/618 (28%)</p> <p>Follow-up - 1985-86<br/>Group 1: 159/593 (27%)<br/>Control: 178/618 (29%)</p> <p>Percent increase<br/>Group 1: 165%<br/>P &lt; 0.0001*<br/>Control: 4.1%<br/>P = 0.56*</p> <p>Follow-up**<br/>OR = 0.91<br/>P = 0.44</p> <p><u>Influenza - Patients with chronic disease</u></p> | <p>The clinician reminder intervention was associated with a dramatic percent rise in influenza immunization rates among elderly patients from 1984-85 to 1985-86. This association was observed in the community setting, corroborating results from studies of clinician reminders in academic primary care.</p> <p>Compliance with the intervention emerged as an issue, with approximately half of eligible attendees receiving vaccine or having a documented refusal. The authors suggested that clinician compliance may be improved by increasing the visual impact of the reminder.</p> | 14 |

Online Supplementary Data

http://www.annfammed.org/content/10/6/538/DC1

|                        |                                                                                      |                                                                                                                                                            |                                                                                                                |                                                                                                                                                                                                                    |                                                                                                                                                                                                                                                                                                                                                                                                                                                                                                                              |                                                                                                                                                                                                                                                                                                                                                                                                                                                                                                                                                                                                                                                                                                                                              |                                                                                                                                                                                                                                                                                                                                                                                                                                                                                                                                                       |    |
|------------------------|--------------------------------------------------------------------------------------|------------------------------------------------------------------------------------------------------------------------------------------------------------|----------------------------------------------------------------------------------------------------------------|--------------------------------------------------------------------------------------------------------------------------------------------------------------------------------------------------------------------|------------------------------------------------------------------------------------------------------------------------------------------------------------------------------------------------------------------------------------------------------------------------------------------------------------------------------------------------------------------------------------------------------------------------------------------------------------------------------------------------------------------------------|----------------------------------------------------------------------------------------------------------------------------------------------------------------------------------------------------------------------------------------------------------------------------------------------------------------------------------------------------------------------------------------------------------------------------------------------------------------------------------------------------------------------------------------------------------------------------------------------------------------------------------------------------------------------------------------------------------------------------------------------|-------------------------------------------------------------------------------------------------------------------------------------------------------------------------------------------------------------------------------------------------------------------------------------------------------------------------------------------------------------------------------------------------------------------------------------------------------------------------------------------------------------------------------------------------------|----|
|                        |                                                                                      |                                                                                                                                                            |                                                                                                                |                                                                                                                                                                                                                    | <p>Proportion of eligible patients receiving vaccination during influenza season</p> <p>Percent increase 1984-85 to 1985-86</p> <p>Odds ratio of receiving vaccination between treatment and control groups</p> <p><u>Influenza - Office-attendees only</u></p> <p>Proportion of eligible patients receiving vaccination during influenza season</p> <p>Percent increase 1984-85 to 1985-86</p> <p>Odds ratio of receiving vaccination between treatment and control groups</p> <p><u>Pneumococcal</u><br/>Not targeted/</p> | <p>Baseline - 1984-85<br/>Group 1: 22/162 (14%)<br/>Control: 67/204 (33%)</p> <p>Follow-up - 1985-86<br/>Group 1: 56/162 (35%)<br/>Control: 74/204 (36%)</p> <p>Percent increase<br/>Group 1: 155%<br/>P &lt; 0.0001*<br/>Control: 10%<br/>P = 0.37*</p> <p>Follow-up**<br/>OR = 0.93<br/>P = 0.74</p> <p><u>Influenza - Office attendees only</u></p> <p>Baseline - 1984-85<br/>Group 1: 60/378 (16%)<br/>Control: 171/392 (44%)</p> <p>Follow-up - 1985-86<br/>Group 1: 159/385 (42%)<br/>Control: 178/379 (47%)</p> <p>Percent increase<br/>Group 1: 162%<br/>P &lt; 0.0001*<br/>Control: 8%<br/>P = 0.39*</p> <p>Follow-up**<br/>OR = 0.79<br/>P = 0.13</p> <p><u>Pneumococcal</u><br/>Not targeted.</p> <p>*, ** - See next column.</p> | <p>The intervention and control practices were not alike, especially with respect to baseline vaccination rates. Risk of bias is substantial. An odds ratio cannot be calculated.</p> <p>Other primary care providers may wish to take advantage of opportunities to employ and test similar innovations under "real conditions".</p> <p>* Single-tailed Z test comparing before and after proportions within group.<br/>** Odds ratios from this study were not entered into meta-analysis due to substantial baseline imbalance between groups.</p> |    |
| Ives et al. 1994 (253) | <p>Design:<br/>CCT</p> <p>Group allocation:<br/>Experimental study with patients</p> | <p>Number of patients: 3884<br/>Female/male: 2205/1679<br/>Group-specific age and gender distribution not reported.</p> <p>Group 1 – Capitation (CAP),</p> | <p>Number of sites: 1<br/>Medicare demonstration project</p> <p>Site affiliation:<br/>Government, Medicare</p> | <p><u>Multi-component demonstration with insurance coverage extensions and capitated clinician reimbursement vs insurance coverage extension and FFS clinician reimbursement vs simple vaccination prompts</u></p> | <p><u>Influenza</u><br/>Proportion of eligible patients receiving vaccination</p>                                                                                                                                                                                                                                                                                                                                                                                                                                            | <p><u>Influenza</u><br/>Baseline<br/>Group 1: 41.2%<br/>Group 2: 41.3%<br/>Control: 40.6%</p>                                                                                                                                                                                                                                                                                                                                                                                                                                                                                                                                                                                                                                                | <p>Providing free immunizations through Medicare will increase immunization rates among the elderly. The elderly are more likely to receive flu shots provided through physicians?</p>                                                                                                                                                                                                                                                                                                                                                                | 21 |



Online Supplementary Data

http://www.annfammed.org/content/10/6/538/DC1

|                                   |                                                                                            |                                                                                                                                                                                                                                                                                                                                                                                                                                                                                                                                                       |                                                                                                                               |                                                                                                                                                                                                                                                                                                                                                                                                                                                                                                                                                                                                                                                                                                                                                                                                                                                                                                                                                                                                                                                                                                          |                                                                                                                                |                                                                                                                                                                                                                                                                                                                                                                                                                                                                                                                                                                                                                                              |                                                                                                                                                                                                               |           |
|-----------------------------------|--------------------------------------------------------------------------------------------|-------------------------------------------------------------------------------------------------------------------------------------------------------------------------------------------------------------------------------------------------------------------------------------------------------------------------------------------------------------------------------------------------------------------------------------------------------------------------------------------------------------------------------------------------------|-------------------------------------------------------------------------------------------------------------------------------|----------------------------------------------------------------------------------------------------------------------------------------------------------------------------------------------------------------------------------------------------------------------------------------------------------------------------------------------------------------------------------------------------------------------------------------------------------------------------------------------------------------------------------------------------------------------------------------------------------------------------------------------------------------------------------------------------------------------------------------------------------------------------------------------------------------------------------------------------------------------------------------------------------------------------------------------------------------------------------------------------------------------------------------------------------------------------------------------------------|--------------------------------------------------------------------------------------------------------------------------------|----------------------------------------------------------------------------------------------------------------------------------------------------------------------------------------------------------------------------------------------------------------------------------------------------------------------------------------------------------------------------------------------------------------------------------------------------------------------------------------------------------------------------------------------------------------------------------------------------------------------------------------------|---------------------------------------------------------------------------------------------------------------------------------------------------------------------------------------------------------------|-----------|
|                                   | <p>randomly allocated to treatment and control groups.</p> <p>Follow-up period: 1 year</p> | <p><u>with delivery via hospital preventive care clinic</u><br/>Number of patients: 1347 (558 patients in analysis)</p> <p><u>Group 1 – Fee for service (FFS) payment to community physicians</u><br/>Number of patients: 1312 (670 patients in analysis)</p> <p><u>Control group</u><br/>Number of patients: 1225 761 patients in analysis</p> <p><u>Eligibility criteria:</u><br/>Medicare beneficiaries aged 65 to 79 years old, community-dwelling, ambulatory, without a diagnosis of a life-threatening cancer within the previous 5 years.</p> | <p>Number of practices or physicians: 8 hospitals, 94 primary care providers</p> <p>Location: United State (Pennsylvania)</p> | <p>Intervention aim: Improve preventive care<br/>QI agent: State Medicare agency</p> <p><u>Group 1 - CAP</u></p> <p>Patient education / reminders: Patients completed a 1.5 hour health risk appraisal (HRA) interview. Physiological parameters were measured. Based on the findings from the interview, participants were mailed color-coded vouchers redeemable for various preventive care interventions.</p> <p>Financial incentive – clinicians: Hospitals were reimbursed \$150 for each patient at initial screening.</p> <p>Financial incentive – patients: Vouchers were funded by the Medicare demonstration project.</p> <p>Delivery site change: Hospitals provided vaccination through capitated preventive care clinics.</p> <p><u>Group 2 – FFS</u></p> <p>Patient education / reminders and patient financial incentives, as above.</p> <p>Financial incentive – clinicians: Physicians and hospitals were reimbursed for voucher services through a fee-for service arrangement.</p> <p><u>Control group</u></p> <p>Patient received vaccination prompts following HRA appraisals.</p> | <p>Odds ratio of receiving vaccination between treatment and control groups</p> <p><u>Pneumococcal</u><br/>Not targeted.</p>   | <p>Follow-up<br/>Group 1: 335/558 (64%)<br/>Group 2: 463/670 (69%)<br/>Control: 412/761 (54%)</p> <p>Follow-up<br/>Group 1 and 2 vs control<br/>Study reports significant difference in proportions (p &lt; 0.0001).</p> <p>Group 1 vs group 2<br/>Study reports significant difference in proportions (p = 0.042).</p> <p>Follow-up<br/>Group 1 vs control<br/>OR = 1.45*<br/>95% CI = [1.15, 1.83]</p> <p>Group 2 vs control<br/>OR = 1.95*<br/>95% CI = [1.56, 2.44]</p> <p><u>Pneumococcal</u><br/>Not targeted.</p> <p>* Adjusted for gender, age, education, marital status, insurance, healthcare utilization, and health status.</p> | <p>offices than through hospital-based clinics.</p>                                                                                                                                                           |           |
| <p>Jacobson et al. 1999 (254)</p> | <p>Design: CCT</p> <p>Group allocation: Experimental study with patients</p>               | <p>Number of patients: 433</p> <p><u>Group 1</u><br/>Number of patients: 221<br/>Female/male: 161/60<br/>Age (mean(sd)): 64.2 (13.1)</p>                                                                                                                                                                                                                                                                                                                                                                                                              | <p>Site description: Ambulatory care clinic of a large inner city teaching hospital</p> <p>Site affiliation: Private</p>      | <p><u>Education brochure used to pre-activate patients in advanced of the physician visit vs usual care</u></p> <p>Intervention aim: Improve vaccination rates</p>                                                                                                                                                                                                                                                                                                                                                                                                                                                                                                                                                                                                                                                                                                                                                                                                                                                                                                                                       | <p><u>Influenza</u><br/>Not targeted.</p> <p><u>Pneumococcal</u><br/>Proportion of eligible patients receiving vaccination</p> | <p><u>Influenza</u><br/>Not targeted.</p> <p><u>Pneumococcal</u><br/>Follow-up<br/>Group 1: 44/221 (20%)</p>                                                                                                                                                                                                                                                                                                                                                                                                                                                                                                                                 | <p>Patient-physician communication and quality of preventive care can be enhanced through the use of a simple, low-literacy, inexpensive, education vehicle that activates patients' participation in the</p> | <p>20</p> |

Online Supplementary Data

http://www.annfammed.org/content/10/6/538/DC1

|                        |                                                                                                                                                                         |                                                                                                                                                                                                                                                                                                                                                                                                                                                                                                                                                                                                                              |                                                                                                                                                                                                                                                                                                                         |                                                                                                                                                                                                                                                                                                                                                                                                                                                                                                                                                                                                                                                       |                                                                                                                                                                                                 |                                                                                                                                                                                                                                                                                                      |                                                                                                                                                                                                                                                                                                         |    |
|------------------------|-------------------------------------------------------------------------------------------------------------------------------------------------------------------------|------------------------------------------------------------------------------------------------------------------------------------------------------------------------------------------------------------------------------------------------------------------------------------------------------------------------------------------------------------------------------------------------------------------------------------------------------------------------------------------------------------------------------------------------------------------------------------------------------------------------------|-------------------------------------------------------------------------------------------------------------------------------------------------------------------------------------------------------------------------------------------------------------------------------------------------------------------------|-------------------------------------------------------------------------------------------------------------------------------------------------------------------------------------------------------------------------------------------------------------------------------------------------------------------------------------------------------------------------------------------------------------------------------------------------------------------------------------------------------------------------------------------------------------------------------------------------------------------------------------------------------|-------------------------------------------------------------------------------------------------------------------------------------------------------------------------------------------------|------------------------------------------------------------------------------------------------------------------------------------------------------------------------------------------------------------------------------------------------------------------------------------------------------|---------------------------------------------------------------------------------------------------------------------------------------------------------------------------------------------------------------------------------------------------------------------------------------------------------|----|
|                        | <p>randomly allocated to patient and control groups.</p> <p>Follow-up period: Not reported.</p>                                                                         | <p><u>Control group</u><br/>Number of patients: 212<br/>Female/male: 139/73<br/>Age (mean(sd)): 61.9 (12.2)</p> <p><u>Eligibility criteria:</u><br/>Patients attending clinic for routine primary care visit, who are aged 65 years or older, or have chronic heart disease, lung disease, or diabetes. Patients had not received pneumococcal vaccination in the previous 5 years.<br/>Exclusions: Received pneumococcal vaccine in the previous 5 years, walk-in visits, first visits, medication-refill visits without a physician interaction, blind patients, clinically documented dementia, non-English speaking.</p> | <p>community delivery system, university/teaching</p> <p>Number of sites: 1 hospital</p> <p>Number of practices or physicians: 1 ambulatory care clinic, with 148 physician / residents, 2 physician assistants, and 6 nurse practitioners</p> <p>Location: United States (Georgia)</p>                                 | <p>QI agent: Medical clinic</p> <p><u>Group 1</u><br/>Patient education / reminders: A single page educational brochure was developed, with text describing eligibility criteria for and the benefits of vaccination. The brochure was attached to the chart of eligible patients. Patients were asked to read the brochure before seeing their physicians.</p> <p><u>Control group</u><br/>Patients received a similar brochure about nutrition.</p>                                                                                                                                                                                                 | <p>Odds ratio of receiving vaccination between treatment and control groups</p>                                                                                                                 | <p>Control: 8/212 (4%)</p> <p>Follow-up<br/>OR = 6.34<br/>P &lt; 0.001</p>                                                                                                                                                                                                                           | <p>health-care interaction.</p> <p>Vaccination rates increased more than 5-fold. Patient-clinician communication, i.e.: proportion of visits in which the clinician recommended the vaccine, increased approximately 4-fold.</p>                                                                        |    |
| Jans et al. 2000 (255) | <p>Design: Cluster CBA</p> <p>Group allocation: Experimental study, with medical clinics allocated to treatment and control groups.</p> <p>Follow-up period: 1 year</p> | <p>Number of patients: 607</p> <p><u>Group 1</u><br/>Number of patients: 455<br/>Female/male: 278/177<br/>Age (% &gt; 60): 16%</p> <p><u>Control group</u><br/>Number of patients: 152<br/>Female/male: 90/62<br/>Age (% &gt; 60): 15%</p> <p><u>Eligibility criteria:</u><br/>Patients between 16 and 70 years of age, with a diagnosis of asthma or COPD, who were not under the care of a specialist pulmonologist. Patients were required not to have a disease expected to influence short-term survival, or another disease affecting lung function.</p>                                                               | <p>Number of sites: 19 general practice clinics *</p> <p>Site affiliation: Private practices</p> <p>Number of practices or physicians: 21 physicians</p> <p>Location: Netherlands</p> <p>* Clinics were allocated to treatment (14 practices with 16 physicians) and control (5 practices with 5 physicians) groups</p> | <p><u>Quality improvement system with educational sessions and performance feedback vs usual care</u></p> <p>Intervention aim: Improve care of COPD and asthma<br/>QI agent: Medical clinics</p> <p><u>Group 1</u><br/>Clinician education: Frank discussions of controversial aspects of Dutch treatment guidelines were held during eleven 90-minute educational meetings over a 15 month period.</p> <p>Audit and feedback: Physicians received data on the care given to patients with asthma or COPD. Discrepancies between actual care and recommendations were discussed. Experiences were shared among peers.</p> <p><u>Control group</u></p> | <p><u>Influenza</u><br/>Proportion of eligible patients receiving vaccination, taken as a continuous score for each physician (median (range))</p> <p><u>Pneumococcal</u><br/>Not targeted.</p> | <p><u>Influenza</u><br/>Follow-up*<br/>Group 1: 61% (R [42%, 81%])<br/>Control: 50% (R [20%, 82%])<br/>P &gt; 0.2**</p> <p><u>Pneumococcal</u><br/>Not targeted.</p> <p>* Outcome survey response rates were 61% in the treatment group and 72% in the control group.<br/>** Mann-Whitney U Test</p> | <p>Implementation of a quality system improved physician compliance with several recommendations given in guidelines on management of patients with asthma and COPD over time. However, improvement does not appear to be reflected in between-group comparisons with concurrent control practices.</p> | 18 |

Online Supplementary Data

http://www.annfammed.org/content/10/6/538/DC1

|                                  |                                                                                                                                                                                                                                                                                                                                                               |                                                                                                                                                                                                                                                                                                                                                                                                                                                                                                             |                                                                                                                                                                                                                                                                                                                                                                                                                                                                                  |                                                                                                                                                                                                                                                                                                                                                                                                                                                                                                                                                                                                                                                                                                                                                                                                                                                                                                                                                                                                                                                                                                             |                                                                                                                                                                                              |                                                                                                                                                                                                                                                                                                                                                                                                                                                                                                                                                                                                                                                                                                                                                                                                                                                                                                                                                                                                  |                                                                                                                                                                                                                                                                   |           |
|----------------------------------|---------------------------------------------------------------------------------------------------------------------------------------------------------------------------------------------------------------------------------------------------------------------------------------------------------------------------------------------------------------|-------------------------------------------------------------------------------------------------------------------------------------------------------------------------------------------------------------------------------------------------------------------------------------------------------------------------------------------------------------------------------------------------------------------------------------------------------------------------------------------------------------|----------------------------------------------------------------------------------------------------------------------------------------------------------------------------------------------------------------------------------------------------------------------------------------------------------------------------------------------------------------------------------------------------------------------------------------------------------------------------------|-------------------------------------------------------------------------------------------------------------------------------------------------------------------------------------------------------------------------------------------------------------------------------------------------------------------------------------------------------------------------------------------------------------------------------------------------------------------------------------------------------------------------------------------------------------------------------------------------------------------------------------------------------------------------------------------------------------------------------------------------------------------------------------------------------------------------------------------------------------------------------------------------------------------------------------------------------------------------------------------------------------------------------------------------------------------------------------------------------------|----------------------------------------------------------------------------------------------------------------------------------------------------------------------------------------------|--------------------------------------------------------------------------------------------------------------------------------------------------------------------------------------------------------------------------------------------------------------------------------------------------------------------------------------------------------------------------------------------------------------------------------------------------------------------------------------------------------------------------------------------------------------------------------------------------------------------------------------------------------------------------------------------------------------------------------------------------------------------------------------------------------------------------------------------------------------------------------------------------------------------------------------------------------------------------------------------------|-------------------------------------------------------------------------------------------------------------------------------------------------------------------------------------------------------------------------------------------------------------------|-----------|
| <p>Johnson et al. 2003 (256)</p> | <p>Design: CBA</p> <p>Group allocation: Experimental study with media market regions in a US state allocated to treatment and control groups for a community media intervention, and patients randomly allocated to treatment and control groups for a patient reminder intervention nested within media market groups.</p> <p>Follow-up period: 3 months</p> | <p>Number of patients: 20755<br/>Age and gender distribution not reported.</p> <p><u>Mass media campaign</u><br/>Group 3 – reminders<br/>Number of patients: Approx. 6639</p> <p>Group 2 – no reminders<br/>Number of patients: Approx. 3735</p> <p><u>No mass media campaign</u><br/>Group 1 - reminders<br/>Number of patients: Approx. 6540</p> <p>Control – no reminders<br/>Number of patients: Approx. 3841</p> <p><u>Eligibility criteria:</u><br/>Medicare beneficiaries aged 65 years or older</p> | <p>Number of sites: A non-profit state-wide foundation conducted the interventions on a Medicare contract, in two geographic “media market” regions in Montana*</p> <p>Site affiliation: Non-profit foundation, government, Medicare</p> <p>Number of practices or physicians: Not reported</p> <p>Location: United States (Montana)</p> <p>* Media market regions were allocated to treatment (1 region) and control (1 region) groups for a mass media education campaign.</p> | <p>Usual care.</p> <p><u>Community media campaign with patient reminder letters vs community media campaign without reminder letters vs reminder letters only vs usual care</u></p> <p>Intervention aim: Improve vaccination rates<br/>QI agent: Non-profit foundation</p> <p><u>Group 1 – Reminders only</u></p> <p>Patient education / reminders: Reminder letters and a brochure were mailed to a sample of Medicare beneficiaries.</p> <p><u>Group 2 – Media only</u></p> <p>Patient education / reminders as above, except without the reminder letters.</p> <p><u>Group 3 – Media + reminders</u></p> <p>Patient education / reminders: A community-wide mass media campaign promoting pneumococcal vaccination was implemented. The campaign involved 30 second television advertisements, newspapers advertisements, posters, and brochures. Organizers recruited members of the health care and business community to display campaign materials. Reminder letters and a brochure were also mailed to a sample of Medicare beneficiaries.</p> <p><u>Control – Usual care</u></p> <p>Usual care</p> | <p>Usual care.</p> <p><u>Pneumococcal</u><br/>Proportion of eligible patients receiving vaccination</p> <p>Odds ratio of receiving vaccination</p> <p><u>Influenza</u><br/>Not targeted.</p> | <p><u>Pneumococcal</u><br/>Follow-up<br/>Group 1: 1175/10381 (11.3%)<br/>Group 2: 617/5741 (10.8%)<br/>Group 3: 1355/10374 (13.1%)<br/>Control: 481/6091 (7.9%)</p> <p>Follow-up<br/>Media vs no media<br/>OR = 1.14<br/>95% CI = [1.07, 1.22]</p> <p>Group 1 vs Control<sup>1</sup><br/>OR = 1.49<br/>95% CI = [1.33, 1.67]</p> <p>Group 2 vs Control<sup>2</sup><br/>OR = 1.40<br/>95% CI = [1.24, 1.59]</p> <p>Group 3 vs Group 1<sup>3</sup><br/>OR = 1.18<br/>95% CI = [1.08, 1.28]</p> <p>Group 3 vs Group 2<sup>4</sup><br/>OR = 1.25<br/>95% CI = [1.13, 1.38]</p> <p><u>Influenza</u><br/>Not targeted.</p> <p><u>Interpretations</u><br/><sup>1</sup> Reminder vs no reminder in a usual care environment.<br/><sup>2</sup> Community media campaign vs no media campaign in a usual care environment<br/><sup>3</sup> Community media campaign vs no media campaign in a reminder environment<br/><sup>4</sup> Reminder vs no reminder in a community media campaign environment.</p> | <p>Both community education and reminder campaigns increased immunization awareness and recent pneumococcal immunizations. Community-wide education campaign augmented the effect of the mailed reminders. However, the additive effect was relatively small.</p> | <p>20</p> |
|----------------------------------|---------------------------------------------------------------------------------------------------------------------------------------------------------------------------------------------------------------------------------------------------------------------------------------------------------------------------------------------------------------|-------------------------------------------------------------------------------------------------------------------------------------------------------------------------------------------------------------------------------------------------------------------------------------------------------------------------------------------------------------------------------------------------------------------------------------------------------------------------------------------------------------|----------------------------------------------------------------------------------------------------------------------------------------------------------------------------------------------------------------------------------------------------------------------------------------------------------------------------------------------------------------------------------------------------------------------------------------------------------------------------------|-------------------------------------------------------------------------------------------------------------------------------------------------------------------------------------------------------------------------------------------------------------------------------------------------------------------------------------------------------------------------------------------------------------------------------------------------------------------------------------------------------------------------------------------------------------------------------------------------------------------------------------------------------------------------------------------------------------------------------------------------------------------------------------------------------------------------------------------------------------------------------------------------------------------------------------------------------------------------------------------------------------------------------------------------------------------------------------------------------------|----------------------------------------------------------------------------------------------------------------------------------------------------------------------------------------------|--------------------------------------------------------------------------------------------------------------------------------------------------------------------------------------------------------------------------------------------------------------------------------------------------------------------------------------------------------------------------------------------------------------------------------------------------------------------------------------------------------------------------------------------------------------------------------------------------------------------------------------------------------------------------------------------------------------------------------------------------------------------------------------------------------------------------------------------------------------------------------------------------------------------------------------------------------------------------------------------------|-------------------------------------------------------------------------------------------------------------------------------------------------------------------------------------------------------------------------------------------------------------------|-----------|

Online Supplementary Data

http://www.annfammed.org/content/10/6/538/DC1

|                                  |                                                                                                                                                                                |                                                                                                                                                                                                                                                                                                                                                                                                                                                                                                                                                                                                                                                                                                                                                                                         |                                                                                                                                                                                                                                                                                      |                                                                                                                                                                                                                                                                                                                                                                                                                                                                                                                                                                                                                                                                                                                                                                                                                                                                                                                                                                                                                                                                                                                                                                                                                                                                                                                                                                                                                                               |                                                                                                                                                                                                                                                        |                                                                                                                                                                                                                                                                                                                                                                                                                           |                                                                                                                                                                                                                                                                                                                                                                                              |           |
|----------------------------------|--------------------------------------------------------------------------------------------------------------------------------------------------------------------------------|-----------------------------------------------------------------------------------------------------------------------------------------------------------------------------------------------------------------------------------------------------------------------------------------------------------------------------------------------------------------------------------------------------------------------------------------------------------------------------------------------------------------------------------------------------------------------------------------------------------------------------------------------------------------------------------------------------------------------------------------------------------------------------------------|--------------------------------------------------------------------------------------------------------------------------------------------------------------------------------------------------------------------------------------------------------------------------------------|-----------------------------------------------------------------------------------------------------------------------------------------------------------------------------------------------------------------------------------------------------------------------------------------------------------------------------------------------------------------------------------------------------------------------------------------------------------------------------------------------------------------------------------------------------------------------------------------------------------------------------------------------------------------------------------------------------------------------------------------------------------------------------------------------------------------------------------------------------------------------------------------------------------------------------------------------------------------------------------------------------------------------------------------------------------------------------------------------------------------------------------------------------------------------------------------------------------------------------------------------------------------------------------------------------------------------------------------------------------------------------------------------------------------------------------------------|--------------------------------------------------------------------------------------------------------------------------------------------------------------------------------------------------------------------------------------------------------|---------------------------------------------------------------------------------------------------------------------------------------------------------------------------------------------------------------------------------------------------------------------------------------------------------------------------------------------------------------------------------------------------------------------------|----------------------------------------------------------------------------------------------------------------------------------------------------------------------------------------------------------------------------------------------------------------------------------------------------------------------------------------------------------------------------------------------|-----------|
| <p>Johnson et al. 2005 (257)</p> | <p>Design:<br/>RCS</p> <p>Group allocation:<br/>Observational study, with patients self-selected into treatment and control groups.</p> <p>Follow-up period:<br/>12 months</p> | <p>Number of patients: 1042</p> <p><u>Group 1</u><br/>Number of patients: 521<br/>Female/male: 308/213<br/>Age (% &gt; 65): 75%</p> <p><u>Control group</u><br/>Number of patients: 521<br/>Female/male: 307/214<br/>Age (% &gt; 65): 78%</p> <p><u>Eligibility criteria:</u><br/>Adult Blue Cross HMO, point-of-service, or Medicare+Choice members with heart failure. Patients were not already participants in a local heart failure disease management program.</p> <p><u>Exclusion:</u> Patients not enrolled in the health plan 3 months prior and 3 months after the study period, cancer, AIDS, transplant recipients, renal failure / dialysis, living in a skilled nursing facility, participated in the disease management program less than 90 days (treatment cohort)</p> | <p>Number of sites: 1<br/>Commercial disease management organization contracted by a large HMO</p> <p>Site affiliation:<br/>Commercial disease management organization, private MCO</p> <p>Number of practices or physicians: Not reported</p> <p>Location: United States (Ohio)</p> | <p><u>Integrated disease management for heart failure program vs usual care</u></p> <p>Intervention aim: Improve care of heart failure<br/>QI agent: Commercial disease management organization</p> <p><u>Group 1</u></p> <p>Patient education / reminders: In addition to the health plan's usual activities, scheduled nurse education sessions and 24 hour nurse counseling and symptom advice were offered by telephone. Printed action plans, workbooks, individualized assessment letters, medication compliance reminders, and vaccination reminders were mailed to patients.</p> <p>Case management: A registered nurse provided a range of accessible services to heart failure patients, including risk stratification, and educational services. Case managers coordinated support with patients' health care plans. Interventions took place primarily via telephone.</p> <p>Clinician reminders: Nurse case managers communicated to physician alerts about signs and symptoms of decompensation. And gaps between patient-reported practice and guideline recommendations.</p> <p>Team change: Nurse case management, as above.</p> <p><u>Control group</u></p> <p>Patient education / reminders: Educational materials, immunization, and health screening reminders were mailed to patients. Health plan members identified as noncompliant for health screenings received additional mailings and automated phone calls.</p> | <p><u>Influenza</u><br/>Proportion of eligible patients receiving vaccination</p> <p>Odds ratio of receiving vaccination between treatment and control groups</p> <p><u>Pneumococcal</u><br/>Proportion of eligible patients receiving vaccination</p> | <p><u>Influenza</u><br/>Baseline<br/>Group 1: 263/521 (51%)<br/>Control: 259/521 (50%)</p> <p>Follow-up<br/>Group 1: 284/521 (55%)<br/>Control: 236/521 (45%)</p> <p>Follow-up<br/>OR = 1.45<br/>P = 0.003</p> <p><u>Pneumococcal</u><br/>Baseline<br/>Group 1: 30/521 (6%)<br/>Control: 29/521 (6%)</p> <p>Follow-up<br/>Group 1: 61/521 (12%)<br/>Control: 44/521 (8%)</p> <p>Follow-up<br/>OR = 1.44<br/>P = 0.080</p> | <p>Participants in a comprehensive, integrated disease management program aimed at improving self-management skills experiences significantly fewer cardiac-related hospital admissions, cardiac-related bed days, and invasive medical procedures compared with a matched cohort group. A significantly greater proportion of the intervention participants had influenza vaccinations.</p> | <p>21</p> |
|----------------------------------|--------------------------------------------------------------------------------------------------------------------------------------------------------------------------------|-----------------------------------------------------------------------------------------------------------------------------------------------------------------------------------------------------------------------------------------------------------------------------------------------------------------------------------------------------------------------------------------------------------------------------------------------------------------------------------------------------------------------------------------------------------------------------------------------------------------------------------------------------------------------------------------------------------------------------------------------------------------------------------------|--------------------------------------------------------------------------------------------------------------------------------------------------------------------------------------------------------------------------------------------------------------------------------------|-----------------------------------------------------------------------------------------------------------------------------------------------------------------------------------------------------------------------------------------------------------------------------------------------------------------------------------------------------------------------------------------------------------------------------------------------------------------------------------------------------------------------------------------------------------------------------------------------------------------------------------------------------------------------------------------------------------------------------------------------------------------------------------------------------------------------------------------------------------------------------------------------------------------------------------------------------------------------------------------------------------------------------------------------------------------------------------------------------------------------------------------------------------------------------------------------------------------------------------------------------------------------------------------------------------------------------------------------------------------------------------------------------------------------------------------------|--------------------------------------------------------------------------------------------------------------------------------------------------------------------------------------------------------------------------------------------------------|---------------------------------------------------------------------------------------------------------------------------------------------------------------------------------------------------------------------------------------------------------------------------------------------------------------------------------------------------------------------------------------------------------------------------|----------------------------------------------------------------------------------------------------------------------------------------------------------------------------------------------------------------------------------------------------------------------------------------------------------------------------------------------------------------------------------------------|-----------|

Online Supplementary Data

http://www.annfammed.org/content/10/6/538/DC1

|                                    |                                                                                                                                                                                         |                                                                                                                                                                                                                                                                                                                                                                                                                                                                                                                                                                     |                                                                                                                                                                                                                                                                                                                                                                               |                                                                                                                                                                                                                                                                                                                                                                                                                                                                                                                                                                                                                                                                                                                                                                                                                                                                                                                                                                                                                                                                                                                                                                                                                                                  |                                                                                                                                                                                           |                                                                                                                                                                                                                                                                                                                                                                                              |                                                                                                                                                                                                                                                                                                              |           |
|------------------------------------|-----------------------------------------------------------------------------------------------------------------------------------------------------------------------------------------|---------------------------------------------------------------------------------------------------------------------------------------------------------------------------------------------------------------------------------------------------------------------------------------------------------------------------------------------------------------------------------------------------------------------------------------------------------------------------------------------------------------------------------------------------------------------|-------------------------------------------------------------------------------------------------------------------------------------------------------------------------------------------------------------------------------------------------------------------------------------------------------------------------------------------------------------------------------|--------------------------------------------------------------------------------------------------------------------------------------------------------------------------------------------------------------------------------------------------------------------------------------------------------------------------------------------------------------------------------------------------------------------------------------------------------------------------------------------------------------------------------------------------------------------------------------------------------------------------------------------------------------------------------------------------------------------------------------------------------------------------------------------------------------------------------------------------------------------------------------------------------------------------------------------------------------------------------------------------------------------------------------------------------------------------------------------------------------------------------------------------------------------------------------------------------------------------------------------------|-------------------------------------------------------------------------------------------------------------------------------------------------------------------------------------------|----------------------------------------------------------------------------------------------------------------------------------------------------------------------------------------------------------------------------------------------------------------------------------------------------------------------------------------------------------------------------------------------|--------------------------------------------------------------------------------------------------------------------------------------------------------------------------------------------------------------------------------------------------------------------------------------------------------------|-----------|
| <p>Karuza et al. 1995 (258)</p>    | <p>Design:<br/>Cluster RCT</p> <p>Group allocation:<br/>Randomized allocation of physician practice groups to treatment and control groups.</p> <p>Follow-up period:<br/>2-6 months</p> | <p>Number of patients: Not reported.<br/>(Analysis occurred at the physician level. Physician characteristics reported below.)</p> <p><u>Group 1</u><br/>Average patient age per physician: 74<br/>Average proportion female per physician: 63%</p> <p><u>Control group</u><br/>Average patient age per physician: 75<br/>Average proportion female per physician: 64%</p> <p><u>Eligibility criteria:</u><br/>Patients aged 65 years or older, not institutionalized, who had been seen at least once by a study physician during an 18 month pre-study period</p> | <p>Number of sites: 13 physician groups*</p> <p>Site affiliation: University, private MCO, private community delivery system, private practices</p> <p>Number of practices or physicians: 51 physicians*</p> <p>Location: United States (New York)</p> <p>* Physician groups randomized to treatment (7 groups, 23 physicians) and control (6 groups, 28 physicians) arms</p> | <p><u>Small group consensus process vs usual care</u></p> <p>Intervention aim: Improve vaccination rates<br/>QI agent: Medical clinics</p> <p><u>Group 1</u></p> <p>Continuous quality improvement (or similar): Physicians in a group practice participated in a facilitated small group discussion. Steps included initial commitment, performance feedback, problem finding, solution generation, and group decision-making.</p> <p>Clinician education: A didactic lecture on influenza and influenza vaccination were provided for study physicians. Additionally, 2 physician practice groups scheduled in-service influenza vaccination educational sessions.</p> <p>Patient education / reminders: Mailed patient reminders adopted in 6/7 physician groups. Clinic posters were adopted in 5 groups.</p> <p>Clinician reminders: 5/7 physician groups adopted a system of chart reminders.</p> <p>Team change: 4/7 physician groups made organizational changes, like having nurses make special appointments with high-risk patients and/or administer vaccine.</p> <p><u>Control group</u></p> <p>A small group consensus process concerning a different quality improvement topic was facilitated among control practice groups.</p> | <p><u>Influenza</u><br/>Proportion of eligible patients receiving vaccination, taken as a continuous score for each physician (mean(sd))</p> <p><u>Pneumococcal</u><br/>Not targeted.</p> | <p><u>Influenza</u><br/>Baseline<br/>Group 1: 48% (24%)<br/>Control: 57% (21%)<br/>P&gt;0.70*</p> <p>Follow-up<br/>Group 1: 63% (21%)<br/>Control: 46% (21%)<br/>P&lt;0.01*</p> <p><u>Pneumococcal</u><br/>Not targeted.</p> <p>* Calculated by ANCOVA at the physician level. Authors performed a sensitivity analysis at the level of physician practice groups. P &lt; 0.05 reported.</p> | <p>The small-group consensus buy-in process was effective in increasing physician compliance with the influenza vaccination guideline in group practices.</p> <p>Physicians' attitudes toward prevention and knowledge about influenza vaccination were not correlated with increased vaccination rates.</p> | <p>23</p> |
| <p>Kellerman et al. 2000 (259)</p> | <p>Design:<br/>CCT</p>                                                                                                                                                                  | <p>Number of patients: 370<br/>Age and gender distributions not reported.</p>                                                                                                                                                                                                                                                                                                                                                                                                                                                                                       | <p>Number of sites: 1 community family practice center</p>                                                                                                                                                                                                                                                                                                                    | <p><u>Supplemental telephone reminders after postcard mailings vs postcard mailings only</u></p>                                                                                                                                                                                                                                                                                                                                                                                                                                                                                                                                                                                                                                                                                                                                                                                                                                                                                                                                                                                                                                                                                                                                                 | <p><u>Influenza</u><br/>Proportion of eligible patients receiving vaccination</p>                                                                                                         | <p><u>Influenza</u><br/>Follow-up<br/>Group 1: 11/154 (7%)</p>                                                                                                                                                                                                                                                                                                                               | <p>No significant increase in immunization rates among patients receiving an additional</p>                                                                                                                                                                                                                  | <p>16</p> |

Online Supplementary Data

http://www.annfammed.org/content/10/6/538/DC1

|                                |                                                                                                                                                                                           |                                                                                                                                                                                                                                                                                                                                                                                                                                                                                                                                                                                                                                                                                                                                         |                                                                                                                                                                                                                                                                                                          |                                                                                                                                                                                                                                                                                                                                                                                                                                                                                                                                                                                                                                                                                                                                                                                                                       |                                                                                                                                                                                        |                                                                                                                                                                                                                                                                                                                                                           |                                                                                                                                                                                                                                                                                                                                                                                                                            |           |
|--------------------------------|-------------------------------------------------------------------------------------------------------------------------------------------------------------------------------------------|-----------------------------------------------------------------------------------------------------------------------------------------------------------------------------------------------------------------------------------------------------------------------------------------------------------------------------------------------------------------------------------------------------------------------------------------------------------------------------------------------------------------------------------------------------------------------------------------------------------------------------------------------------------------------------------------------------------------------------------------|----------------------------------------------------------------------------------------------------------------------------------------------------------------------------------------------------------------------------------------------------------------------------------------------------------|-----------------------------------------------------------------------------------------------------------------------------------------------------------------------------------------------------------------------------------------------------------------------------------------------------------------------------------------------------------------------------------------------------------------------------------------------------------------------------------------------------------------------------------------------------------------------------------------------------------------------------------------------------------------------------------------------------------------------------------------------------------------------------------------------------------------------|----------------------------------------------------------------------------------------------------------------------------------------------------------------------------------------|-----------------------------------------------------------------------------------------------------------------------------------------------------------------------------------------------------------------------------------------------------------------------------------------------------------------------------------------------------------|----------------------------------------------------------------------------------------------------------------------------------------------------------------------------------------------------------------------------------------------------------------------------------------------------------------------------------------------------------------------------------------------------------------------------|-----------|
|                                | <p>Group allocation:<br/>Experimental study with patient households assigned to treatment and control groups.</p> <p>Follow-up period:<br/>Not reported.</p>                              | <p><u>Group 1</u><br/>Number of patients: 154</p> <p><u>Control group</u><br/>Number of patients: 216</p> <p><u>Eligibility criteria:</u><br/>Patients aged 65 years or older, living in the community, who had received at least 1 office service within the previous 2 years. All patients were non-responders at 1 month after a post-card influenza vaccination reminder.</p>                                                                                                                                                                                                                                                                                                                                                       | <p>Site affiliation: Private community delivery system, university/teaching site</p> <p>Number of practices or physicians: As above.</p> <p>Location: United States (Kansas)</p>                                                                                                                         | <p>Intervention aim: Improve vaccination rates<br/>QI agent: Community delivery system</p> <p><u>Group 1</u><br/>Patient education / reminders: Patients were sent postcards describing the availability of influenza. Patients who had not responded to the postcard within 1 month were reminded by telephone call.</p> <p><u>Control group</u><br/>Patient education / reminders as above, except without supplemental telephone reminder calls.</p>                                                                                                                                                                                                                                                                                                                                                               | <p>Odds ratio of receiving vaccination between treatment and control groups</p> <p><u>Pneumococcal</u><br/>Not targeted.</p>                                                           | <p>Control: 19/216 (9%)</p> <p>Follow-up<br/>OR = 0.80<br/>P = 0.70</p> <p><u>Pneumococcal</u><br/>Not targeted.</p>                                                                                                                                                                                                                                      | <p>telephone intervention, compared with patients receiving post card reminders only.</p> <p>This may be due to unreliable clinic records, which did not record receipt of influenza vaccination at non-practice community sites.</p>                                                                                                                                                                                      |           |
| <p>Kerse et al. 1999 (260)</p> | <p>Design:<br/>Cluster RCT</p> <p>Group allocation:<br/>Experimental study, with general practitioners allocated to treatment and control groups.</p> <p>Follow-up period:<br/>1 year</p> | <p>Number of patients: 307 (267 patients were randomized, 233 patients available at analysis, enumerated below.)</p> <p><u>Group 1</u><br/>Number of patients: 121<br/>Female/male: 66/55*<br/>Age (mean(sd)): 72.9 (0.57)</p> <p><u>Control group</u><br/>Number of patients: 112<br/>Female/male: 60/52*<br/>Age (mean(sd)): 74.2 (0.62)</p> <p><u>Eligibility criteria:</u><br/>General practitioners working more than 12 hours per week, single GP practice-sites, and no computerized recall system for influenza vaccination. Patients aged 65 years or older, English speaking, community dwelling, attended a study practice in the previous 18 months, and attended the enrolled GP for 3 of the last 5 GP consultations.</p> | <p>Number of sites: 42 general practices</p> <p>Site affiliation: Private practices</p> <p>Number of practices or physicians: 42 general practices, as above.*</p> <p>Location: Australia (Victoria)</p> <p>* General practitioners were allocated to treatment (21 GPs) and control (21 GPs) groups</p> | <p><u>GP education and audit and feedback vs usual care</u></p> <p>Intervention aim: Improve care of the elderly<br/>QI agent: Medical clinics</p> <p><u>Group 1</u><br/>Audit and feedback: Clinicians discussed exercise and social activity, and reviewed the medication and vaccination status of 50 consecutive elderly patients.</p> <p>Clinician education: Didactic seminars on exercise, social activity, and prescribing, from experienced practitioners. GPs were also provided with directories of community services for elderly patients.</p> <p>Clinician reminders: Practice reception staff attached a yellow prompt card to the medical records of all patients over 65 years of age. Cards recorded discussions of physical and social activity, vaccination, drug lists, and problem reviews.</p> | <p><u>Influenza</u><br/>Proportion of eligible patients receiving vaccination</p> <p>Risk difference associated with the intervention</p> <p><u>Pneumococcal</u><br/>Not targeted.</p> | <p><u>Influenza</u><br/>Baseline<br/>Group 1: 76/121 (63%)<br/>Control: 78/112 (70%)</p> <p>Follow-up<br/>Not reported</p> <p>Follow-up<br/>RD = -0.63%*<br/>95% CI = [-1.45%, 0.20%]<br/>P = 0.14</p> <p><u>Pneumococcal</u><br/>Not targeted.</p> <p>* Adjusted for baseline immunization status, GP billing status, and intra-cluster correlations</p> | <p>No differential effect on influenza vaccination status was observed. Influenza vaccination rates increased by almost 10% in both groups, and baseline rates were higher than expected.</p> <p>An education intervention in general practice showed an increase in physical activity, frequency of pleasurable activities, and self rated health of elderly patients, important independent predictors of wellbeing.</p> | <p>24</p> |

Online Supplementary Data

http://www.annfammed.org/content/10/6/538/DC1

|                         |                                                                                                                                                                                         |                                                                                                                                                                                                                                                                                                                                                                                                                                                                                                                                                                                                                                                                                                                                                                                                                                                        |                                                                                                                                                                                                                                                                                                                                                                                                                                                           |                                                                                                                                                                                                                                                                                                                                                                                                                                                                                                                                                                                                                                                                                                                                                                                                                                                                                                                                                                                                                                                                                                                                        |                                                                                                                                                                                                               |                                                                                                                                                                                                                                                                                                                                                                                                                                                                          |                                                                                                                                                                                                                                                                                                                                                                                                                                      |    |
|-------------------------|-----------------------------------------------------------------------------------------------------------------------------------------------------------------------------------------|--------------------------------------------------------------------------------------------------------------------------------------------------------------------------------------------------------------------------------------------------------------------------------------------------------------------------------------------------------------------------------------------------------------------------------------------------------------------------------------------------------------------------------------------------------------------------------------------------------------------------------------------------------------------------------------------------------------------------------------------------------------------------------------------------------------------------------------------------------|-----------------------------------------------------------------------------------------------------------------------------------------------------------------------------------------------------------------------------------------------------------------------------------------------------------------------------------------------------------------------------------------------------------------------------------------------------------|----------------------------------------------------------------------------------------------------------------------------------------------------------------------------------------------------------------------------------------------------------------------------------------------------------------------------------------------------------------------------------------------------------------------------------------------------------------------------------------------------------------------------------------------------------------------------------------------------------------------------------------------------------------------------------------------------------------------------------------------------------------------------------------------------------------------------------------------------------------------------------------------------------------------------------------------------------------------------------------------------------------------------------------------------------------------------------------------------------------------------------------|---------------------------------------------------------------------------------------------------------------------------------------------------------------------------------------------------------------|--------------------------------------------------------------------------------------------------------------------------------------------------------------------------------------------------------------------------------------------------------------------------------------------------------------------------------------------------------------------------------------------------------------------------------------------------------------------------|--------------------------------------------------------------------------------------------------------------------------------------------------------------------------------------------------------------------------------------------------------------------------------------------------------------------------------------------------------------------------------------------------------------------------------------|----|
|                         |                                                                                                                                                                                         |                                                                                                                                                                                                                                                                                                                                                                                                                                                                                                                                                                                                                                                                                                                                                                                                                                                        |                                                                                                                                                                                                                                                                                                                                                                                                                                                           | <p><u>Control group</u></p> <p>Usual care</p>                                                                                                                                                                                                                                                                                                                                                                                                                                                                                                                                                                                                                                                                                                                                                                                                                                                                                                                                                                                                                                                                                          |                                                                                                                                                                                                               |                                                                                                                                                                                                                                                                                                                                                                                                                                                                          |                                                                                                                                                                                                                                                                                                                                                                                                                                      |    |
| Kiefe et al. 2001 (261) | <p>Design:<br/>Cluster RCT</p> <p>Group allocation:<br/>Experimental study with physicians randomly allocated to treatment and control groups.</p> <p>Follow-up period:<br/>3 years</p> | <p>Number of patients: 1931*</p> <p><u>Group 1</u><br/>Number of patients: 965*<br/>Age (mean(sd)): 75.9 (sd not reported)</p> <p><u>Control group</u><br/>Number of patients: 966*<br/>Age (mean(sd)): 76.1 (sd not reported)</p> <p><u>Eligibility criteria:</u><br/>Physicians practicing family medicine, internal medicine, or endocrinology with a minimum of 2 eligible diabetic patients enrolled in a fee-for-service Medicare plan. Eligible patients were aged 65 years or older, had a billing diagnosis of diabetes mellitus, had no end-stage renal disease, were community-dwelling, and were alive at baseline. 20 patients were selected from Medicare records for each physician enrolled.</p> <p>* Measurement designed as serial cross-sections of patients for each physician. Patient characteristics reported for baseline.</p> | <p>Number of sites: 1 quality improvement demonstration project sponsored by federal Medicare administrators</p> <p>Site affiliation: Medicare, government</p> <p>Number of practices or physicians: 97*</p> <p>Location: United States (Alabama)</p> <p>* 97 physicians were allocated to treatment (48 physicians) and control (49 physicians) groups. In both groups, the number of physicians remaining at analysis were 35 and 35, respectively.</p> | <p><u>Audit and feedback with physician performance benchmarking vs audit and feedback only</u></p> <p>Intervention aim: Improve diabetes care<br/>QI agent: Medicare-affiliated organization</p> <p><u>Group 1</u></p> <p>Audit and feedback: Physicians were informed of their individual performance on performance indicators as well as the mean performance of their peers. Feedback was provided in mailings 3 to 6 weeks apart. Additionally, intervention physicians were benchmarked against the average performance of the top 10% of physicians assessed in feedback reports.</p> <p>CQI (or similar): The quality improvement agency offered assistance to physicians developing quality improvement plans. Plans varied widely, and included formal group meetings; root cause analyses; and changes in office practices, such as chart interventions, reminders, clinical “flow sheets”, and standing orders for appropriate nurse administration of influenza vaccination.</p> <p><u>Control group</u></p> <p>Audit and feedback: As above, without the physician benchmarking.</p> <p>CQI (or similar): As above.</p> | <p><u>Influenza</u><br/>Proportion of eligible patients receiving vaccination</p> <p>Odds ratio of receiving vaccination between treatment and control groups</p> <p><u>Pneumococcal</u><br/>Not targeted</p> | <p><u>Influenza</u><br/>Baseline<br/>Group 1: 40%<br/>Control: 40%</p> <p>Follow-up<br/>Group 1: 58%<br/>Control: 46%</p> <p>Follow-up<br/>OR = 1.57*<br/>P &lt; 0.001</p> <p>OR = 1.54 **<br/>95% CI = [1.21, 1.96]</p> <p><u>Pneumococcal</u><br/>Not targeted.</p> <p>* Adjusted for baseline performance and for nesting of patients within physicians.<br/>** Adjusted for baseline performance, nesting of patients, and for select physician characteristics.</p> | <p>Benchmark feedback improved clinician performance beyond the effect produced by an underlying audit and feedback / CQI intervention. For influenza vaccination, foot examination, and long-term glucose control measurement, physician receipt of achievable benchmark feedback was associated with 33% to 57% improvement in the odds of patients receiving appropriate care at follow-up compared to comparison physicians.</p> | 23 |
| Kim et al. 1999 (262)   | <p>Design:<br/>Cluster RCT</p> <p>Group allocation:</p>                                                                                                                                 | <p>Number of patients: 1810</p> <p><u>Group 1</u><br/>Number of patients: 905</p>                                                                                                                                                                                                                                                                                                                                                                                                                                                                                                                                                                                                                                                                                                                                                                      | <p>Number of sites: 1 Large health maintenance organization</p>                                                                                                                                                                                                                                                                                                                                                                                           | <p><u>Pharmacist preventive care detailing and performance feedback with benchmarking vs clinician education mailings only</u></p>                                                                                                                                                                                                                                                                                                                                                                                                                                                                                                                                                                                                                                                                                                                                                                                                                                                                                                                                                                                                     | <p><u>Influenza – patient survey results</u><br/>Proportion of eligible patients offered or receiving vaccination</p>                                                                                         | <p><u>Influenza – survey results</u><br/>Baseline<br/>Group 1: 565/706 (80%)<br/>Control: 548/694 (79%)</p>                                                                                                                                                                                                                                                                                                                                                              | <p>A comprehensive clinician education program supported by audit and feedback had mixed effects on a number of preventive</p>                                                                                                                                                                                                                                                                                                       | 23 |

Online Supplementary Data

http://www.annfammed.org/content/10/6/538/DC1

|                               |                                                                                                                                                       |                                                                                                                                                                                                                                                                                                  |                                                                                                                                                                                                                                               |                                                                                                                                                                                                                                                                                                                                                                                                                                                                                                                                                                                                                                                                                                                                                                                                                                                                                                                                                                                                                          |                                                                                                                                                                                                                                                                                                                        |                                                                                                                                                                                                                                                                                                                                                                                                                                                                                                                                                                                    |                                                                                                                                                                                                                                                                                                                                                                                                                    |           |
|-------------------------------|-------------------------------------------------------------------------------------------------------------------------------------------------------|--------------------------------------------------------------------------------------------------------------------------------------------------------------------------------------------------------------------------------------------------------------------------------------------------|-----------------------------------------------------------------------------------------------------------------------------------------------------------------------------------------------------------------------------------------------|--------------------------------------------------------------------------------------------------------------------------------------------------------------------------------------------------------------------------------------------------------------------------------------------------------------------------------------------------------------------------------------------------------------------------------------------------------------------------------------------------------------------------------------------------------------------------------------------------------------------------------------------------------------------------------------------------------------------------------------------------------------------------------------------------------------------------------------------------------------------------------------------------------------------------------------------------------------------------------------------------------------------------|------------------------------------------------------------------------------------------------------------------------------------------------------------------------------------------------------------------------------------------------------------------------------------------------------------------------|------------------------------------------------------------------------------------------------------------------------------------------------------------------------------------------------------------------------------------------------------------------------------------------------------------------------------------------------------------------------------------------------------------------------------------------------------------------------------------------------------------------------------------------------------------------------------------|--------------------------------------------------------------------------------------------------------------------------------------------------------------------------------------------------------------------------------------------------------------------------------------------------------------------------------------------------------------------------------------------------------------------|-----------|
|                               | <p>Experimental study with physicians randomized to treatment and control groups.</p> <p>Follow-up period: 3 years</p>                                | <p>Female/male: 456/449<br/>Age (mean(sd)): 73 (3)</p> <p><u>Control group</u><br/>Number of patients: 905<br/>Female/male: 500/405<br/>Age (mean(sd)): 73 (3)</p> <p><u>Eligibility criteria:</u> Patients belonging to primary care practitioners within a large HMO, aged 65 to 75 years.</p> | <p>Site affiliation: Private MCO</p> <p>Number of practices or physicians: 48 physicians*</p> <p>Location: United States (California)</p> <p>* Physicians were randomized to treatment (24 physicians) and control (24 physicians) groups</p> | <p>Intervention aim: Improve preventive care<br/>QI agent: Large HMO</p> <p><u>Group 1</u></p> <p>Clinician education: Pharmacists provided physicians with face-to-face education about up-to-date recommendations for preventive care services in several sessions of 15 minutes each. Additionally, all study physicians were mailed educational materials containing one-page overviews of recommended preventive care services.</p> <p>Audit and feedback: Results from patient surveys and medical record review for physician compliance with preventive care procedures and patient satisfaction were presented to each physician in the form of bar graphs comparing each physician's score with those of her or his peers.</p> <p>Team change: Pharmacists were enlisted to provide outreach education to clinicians.</p> <p><u>Control group</u></p> <p>Clinician education: All study physicians were mailed educational materials containing one-page overview of recommended preventive care services.</p> | <p>Odds ratio of <i>being offered or receiving</i> vaccination between treatment and control groups</p> <p><u>Pneumococcal</u><br/>Proportion of eligible patients <i>offered or receiving</i> vaccination</p> <p>Odds ratio of <i>being offered or receiving</i> vaccination between treatment and control groups</p> | <p>Follow-up<br/>Group 1: 643/706 (91%)<br/>Control: 618/694 (89%)</p> <p>Test of significance*<br/>P = 0.86</p> <p>Follow-up **<br/>OR = 1.25<br/>P = 0.21</p> <p><u>Pneumococcal</u><br/>Baseline<br/>Group 1: 222/653 (34%)<br/>Control: 273/650 (42%)</p> <p>Follow-up<br/>Group 1: 477/653 (73%)<br/>Control: 475/650 (73%)</p> <p>Test of significance*<br/>P = 0.02</p> <p>Follow-up**<br/>OR = 1.00<br/>P = 1.00</p> <p>* Analysis of change scores for individual patients performed with mixed-effects ANOVA.<br/>** Crude estimate calculated by present reviewers.</p> | <p>care measures.</p> <p>The addition of audit and feedback and academic detailing with a pharmacist did not change influenza immunization rates in the background of clinician education. Pneumococcal immunization rates were not different at follow-up – however, members of the intervention group appeared to exhibit better <i>improvement</i> in immunization rates than members of the control group.</p> |           |
| <p>Korn et al. 1988 (263)</p> | <p>Design: Cluster PCS</p> <p>Group allocation: Medical residents who had previously rotated through a site with a multifactorial preventive care</p> | <p>Number of patients: 150<br/>Age and gender distributions not reported.</p> <p><u>Group 1</u><br/>Number of patients: 73 for influenza, 71 for pneumococcal vaccination</p> <p><u>Control group</u></p>                                                                                        | <p>Number of sites: 1 VA ambulatory internal medicine clinic*</p> <p>Site affiliation: University and VA</p> <p>Number of practices or physicians: Not reported</p>                                                                           | <p><u>Previous exposure to a multifactorial preventive care intervention vs usual care</u></p> <p>Intervention aim: Improve preventive care<br/>QI agent: Medical clinics</p> <p><u>Group 1</u></p>                                                                                                                                                                                                                                                                                                                                                                                                                                                                                                                                                                                                                                                                                                                                                                                                                      | <p><u>Influenza</u><br/>Proportion of eligible patients receiving vaccination</p> <p>Odds ratio of receiving vaccination between treatment and control groups</p>                                                                                                                                                      | <p><u>Influenza</u><br/>Follow-up*<br/>Group 1: 28%<br/>Control: 7%<br/>P = 0.03</p> <p>Follow-up*<br/>OR = 5.43<br/>P &lt; 0.001</p>                                                                                                                                                                                                                                                                                                                                                                                                                                              | <p>Resident physicians exposed in the previous year to a multifaceted intervention provided more influenza vaccinations at a non-intervention clinical site than those who had not been exposed. The intervention had significant effects in a separate clinic environment.</p>                                                                                                                                    | <p>20</p> |



Online Supplementary Data

http://www.annfammed.org/content/10/6/538/DC1

|                           |                                                                                                                                                                                                                            |                                                                                                                                                                                                                                                                                                                                                                                                                                                                            |                                                                                                                                                                                                                                                                                                                                                                                                                                                                                                                                                             |                                                                                                                                                                                                                                                                                                                                                                                                                                                                                                                                                                                                                                                                                                                                                                                                                                                                                                                         |                                                                                                                                                                                                                                                                                                                                                                                                                 |                                                                                                                                                                                                                                                                                                                                                                                                                                                                                                                                        |                                                                                                                                                                                                                                                                                                                                                                                      |    |
|---------------------------|----------------------------------------------------------------------------------------------------------------------------------------------------------------------------------------------------------------------------|----------------------------------------------------------------------------------------------------------------------------------------------------------------------------------------------------------------------------------------------------------------------------------------------------------------------------------------------------------------------------------------------------------------------------------------------------------------------------|-------------------------------------------------------------------------------------------------------------------------------------------------------------------------------------------------------------------------------------------------------------------------------------------------------------------------------------------------------------------------------------------------------------------------------------------------------------------------------------------------------------------------------------------------------------|-------------------------------------------------------------------------------------------------------------------------------------------------------------------------------------------------------------------------------------------------------------------------------------------------------------------------------------------------------------------------------------------------------------------------------------------------------------------------------------------------------------------------------------------------------------------------------------------------------------------------------------------------------------------------------------------------------------------------------------------------------------------------------------------------------------------------------------------------------------------------------------------------------------------------|-----------------------------------------------------------------------------------------------------------------------------------------------------------------------------------------------------------------------------------------------------------------------------------------------------------------------------------------------------------------------------------------------------------------|----------------------------------------------------------------------------------------------------------------------------------------------------------------------------------------------------------------------------------------------------------------------------------------------------------------------------------------------------------------------------------------------------------------------------------------------------------------------------------------------------------------------------------------|--------------------------------------------------------------------------------------------------------------------------------------------------------------------------------------------------------------------------------------------------------------------------------------------------------------------------------------------------------------------------------------|----|
|                           | <p>intervention were compared to medical residents who had not.</p> <p>Follow-up period: 12 months</p>                                                                                                                     | <p>Number of patients: 77</p> <p><u>Eligibility criteria:</u> Patients aged 65 years or older attending the study sites. Patients eligible for pneumococcal vaccine had not previously been vaccinated.</p>                                                                                                                                                                                                                                                                | <p>Location: United States (Minnesota)</p> <p>* This study also reported before-and-after results at an intervention site prior to the controlled evaluation at the VA site.</p>                                                                                                                                                                                                                                                                                                                                                                            | <p>Audit and feedback: Residents had attended chart review conferences, where they were given performance feedback regarding patient management, including attention to preventive care.</p> <p>Clinician education: Residents had attended a didactic seminar addressing issues in adult health maintenance.</p> <p>Clinician reminders: Residents had been exposed to preventive care checklists attached to outpatient charts.</p> <p><u>Control group</u></p> <p>Usual care, no previous exposure to intervention.</p>                                                                                                                                                                                                                                                                                                                                                                                              | <p><u>Pneumococcal</u><br/>Proportion of eligible patients receiving vaccination</p> <p>Odds ratio of receiving vaccination between treatment and control groups</p>                                                                                                                                                                                                                                            | <p><u>Pneumococcal</u><br/>Follow-up*<br/>Group 1: 27%<br/>Control: 16%<br/>P = Non-significant</p> <p>Follow-up*<br/>OR = 1.98<br/>P = 0.11</p> <p>* Percentages were visually extracted from a graph. Odds ratios calculated by present reviewers from these reported values. Tests are unadjusted for potential unit of analysis errors.</p>                                                                                                                                                                                        |                                                                                                                                                                                                                                                                                                                                                                                      |    |
| Kouides et al. 1993 (264) | <p>Design: Cluster CBA</p> <p>Group allocation: Physicians at one academic general medicine site were exposed to the intervention and compared with unexposed community practitioners.</p> <p>Follow-up period: 1 year</p> | <p>Number of patients: 42658<br/>Age and gender distribution not reported.</p> <p><u>Group 1</u><br/>Number of patients: 12271</p> <p><u>Control group</u><br/>Number of patients: 30387</p> <p><u>Eligibility criteria:</u> Primary care physicians in Monroe County and at the Genesee hospital, Rochester, NY, able to identify a stable group of at least 50 ambulatory elderly patients. Patients aged 65 years or older were targeted for influenza vaccination.</p> | <p>Number of sites: Medicare demonstration project involving 1 hospital outpatient general medicine clinic and community general medicine practices in Monroe County, New York*</p> <p>Site affiliation: University, private practice</p> <p>Number of practices or physicians: 53 physicians at the hospital clinic, and 82 physicians in the community</p> <p>Location: United States (New York)</p> <p>* Physicians at the former site were exposed to the intervention, while physicians in the community comprised the unexposed comparison group.</p> | <p><u>Performance based incentives vs no incentives</u></p> <p>Intervention aim: Improve vaccination rates<br/>QI agent: Medicare demonstration project</p> <p><u>Group 1</u></p> <p>Financial incentive - clinicians: Physicians at the intervention site were eligible for an extra 10% (\$0.80/patient) above the \$8.00/patient Medicare immunization fee if they attained a final immunization rate of 70% or greater. At a final immunization rate of 85% or greater, physicians received an additional 20% (\$1.60/patient) above the usual Medicare fee. Immunizations provided at outside sites were counted towards the final coverage rate, but physicians received the performance premium only for those patients immunized at the physician's office.</p> <p>Audit and feedback: All study physicians, including those in the comparison practices, used a poster to track immunization coverage on a</p> | <p><u>Influenza</u><br/>Proportion of eligible patients receiving vaccination, taken as a continuous physician performance score (mean (95% CI))</p> <p>Improvement in physician performance score associate with the intervention</p> <p>Proportion of physicians attaining the 75% target rate</p> <p>Proportion of physicians attaining the 85% target rate</p> <p><u>Pneumococcal</u><br/>Not targeted.</p> | <p><u>Influenza</u><br/>Follow-up<br/>Group 1: 73.1% (95% CI [69.1%, 77.1%])<br/>Control: 55.7% (95% CI [52.1%, 59.3%])<br/>P &lt; 0.001</p> <p>Follow-up<br/>Coefficient = +8.7%*<br/>P = 0.003</p> <p>Follow-up<br/>Group 1: 32/53 (60%)<br/>Control: 14/82 (17%)<br/>P &lt; 0.001</p> <p>Follow-up<br/>Group 1: 10/53 (19%)<br/>Control: 4/82 (5%)<br/>P &lt; 0.002</p> <p><u>Pneumococcal</u><br/>Not targeted.</p> <p>* In a linear regression model adjusted for practice size, gender and specialty of the provider, use of</p> | <p>A performance-based incentive program was associated with increased influenza immunization rates among the elderly, in a setting where practitioners tracked their immunization coverage using a weekly-updated office poster. Physicians in this study deployed numerous tactics to improve their vaccination rates, including chart reminders, postcards, and office signs.</p> | 18 |

Online Supplementary Data

http://www.annfammed.org/content/10/6/538/DC1

|                           |                                                                                                                                                                                                |                                                                                                                                                                                                                                                                                                                                                                                                                                                                                                                                                                                                                |                                                                                                                                                                                                                                                                                                                                                       |                                                                                                                                                                                                                                                                                                                                                                                                                                                                                                                                                                                                                                                                                                                                                                                                                                                                                                                                                                                                                                                                                                 |                                                                                                                                                                                                                                                                                                                                                                                                                                                                                                                                |                                                                                                                                                                                                                                                                                                                                                                                                                                                                                                                               |                                                                                                                                                  |    |
|---------------------------|------------------------------------------------------------------------------------------------------------------------------------------------------------------------------------------------|----------------------------------------------------------------------------------------------------------------------------------------------------------------------------------------------------------------------------------------------------------------------------------------------------------------------------------------------------------------------------------------------------------------------------------------------------------------------------------------------------------------------------------------------------------------------------------------------------------------|-------------------------------------------------------------------------------------------------------------------------------------------------------------------------------------------------------------------------------------------------------------------------------------------------------------------------------------------------------|-------------------------------------------------------------------------------------------------------------------------------------------------------------------------------------------------------------------------------------------------------------------------------------------------------------------------------------------------------------------------------------------------------------------------------------------------------------------------------------------------------------------------------------------------------------------------------------------------------------------------------------------------------------------------------------------------------------------------------------------------------------------------------------------------------------------------------------------------------------------------------------------------------------------------------------------------------------------------------------------------------------------------------------------------------------------------------------------------|--------------------------------------------------------------------------------------------------------------------------------------------------------------------------------------------------------------------------------------------------------------------------------------------------------------------------------------------------------------------------------------------------------------------------------------------------------------------------------------------------------------------------------|-------------------------------------------------------------------------------------------------------------------------------------------------------------------------------------------------------------------------------------------------------------------------------------------------------------------------------------------------------------------------------------------------------------------------------------------------------------------------------------------------------------------------------|--------------------------------------------------------------------------------------------------------------------------------------------------|----|
|                           |                                                                                                                                                                                                |                                                                                                                                                                                                                                                                                                                                                                                                                                                                                                                                                                                                                |                                                                                                                                                                                                                                                                                                                                                       | <p>weekly basis. Physicians could deploy any QI technique to improve vaccination rates.</p> <p><u>Control group</u></p> <p>Audit and feedback: All study physicians used a poster to track immunization coverage on a weekly basis. Physicians could deploy any QI technique to improve vaccination rates.</p>                                                                                                                                                                                                                                                                                                                                                                                                                                                                                                                                                                                                                                                                                                                                                                                  |                                                                                                                                                                                                                                                                                                                                                                                                                                                                                                                                | <p>reminder postcards, and service to medically indigent populations. These attributes had been found on univariate analysis to be statistically significant predictors of vaccination rates.</p>                                                                                                                                                                                                                                                                                                                             |                                                                                                                                                  |    |
| Kouides et al. 1998 (265) | <p>Design:<br/>Cluster RCT</p> <p>Group allocation:<br/>Experimental study with physician practices randomly allocated to treatment or control groups.</p> <p>Follow-up period:<br/>1 year</p> | <p>Number of patients: 38804<br/>Age and gender distribution not reported</p> <p><u>Group 1</u><br/>Number of patients: 21196</p> <p><u>Control group</u><br/>Number of patients: 17608</p> <p><u>Eligibility criteria:</u></p> <p>Physicians – Provision of primary care to at least 50 elderly patients, participation in the demonstration project, use of a target-based poster audit and feedback method of tracking immunizations, and lack of participation in a previous study.</p> <p>Patients – Non-institutionalized patients aged 65 years or older, who had an office visit in the last year.</p> | <p>Number of sites: 1<br/>Medicare influenza vaccination demonstration project, in a single New York county.</p> <p>Site affiliation: Medicare</p> <p>Number of practices or physicians: 54 practices*</p> <p>Location: United States (New York)</p> <p>* Practices were allocated to treatment (27 practices) and control (27 practices) groups.</p> | <p><u>Pay for performance in addition to audit and feedback vs audit and feedback only</u></p> <p>Intervention aim: Improve vaccination rates<br/>QI agent: State Medicare organization</p> <p><u>Group 1</u></p> <p>Audit and feedback: All study practices implemented target-based vaccination performance tracking posters, placed in a prominent location.</p> <p>Financial incentive – clinicians: Physicians were eligible for reimbursement above the standard \$8 vaccine administration fee established by the Medicare Demonstration Project, if immunization rates above 70% or 85% were attained. At rates above 70% or 85%, physicians received an additional 10% (\$0.80 per shot) or 20% (\$1.60 per shot) reimbursement, respectively. Immunizations obtained outside the clinic were included under the physician’s performance.</p> <p>Patient education / reminders: All patients in the study region were exposed to an extensive media campaign and beneficiary letters to all Medicare recipients.</p> <p><u>Control group</u></p> <p>Audit and feedback and patient</p> | <p><u>Influenza</u><br/>Proportion of eligible patients receiving vaccination</p> <p>Odds ratio of receiving vaccination between treatment and control groups</p> <p>Mean proportion of eligible patients receiving vaccination, treated as a continuous outcome for each physician (mean (sd))</p> <p>Mean change from baseline performance, treated as a continuous outcome.</p> <p>Change in vaccination performance for each physician, associated with the intervention.</p> <p><u>Pneumococcal</u><br/>Not targeted.</p> | <p><u>Influenza</u><br/>Follow-up<br/>Group 1: 14182/21196 (67%)<br/>Control: 10580/17608 (60%)</p> <p>Follow-up*<br/>OR = 1.34<br/>P &lt; 0.001</p> <p>Follow-up<br/>Group 1: 68.6% (16.6%)<br/>Control: 62.7% (18.0%)</p> <p>Follow-up<br/>Group 1: 10.3%<br/>Control: 3.5%</p> <p>Follow-up<br/>Coefficient = 7.1%**<br/>P = 0.05</p> <p><u>Pneumococcal</u><br/>Not targeted.</p> <p>* Crude estimates calculated by present reviewers.<br/>**Adjusted for baseline immunization performance using linear regression.</p> | <p>Performance-based financial incentives for immunization resulted in a significant 7.1% better change in immunization rates from baseline.</p> | 23 |

Online Supplementary Data

http://www.annfammed.org/content/10/6/538/DC1

|                                  |                                                                                                                                                                           |                                                                                                                                                                                                                                                                                                                                                                                                                                                                                                                            |                                                                                                                                                                                                                           |                                                                                                                                                                                                                                                                                                                                                                                                                                                                                                                                                                                                                                                                                                                                                                                                                                                                                                                                                                                                                                                                                                            |                                                                                                                                                                                                                                                                                                                                                       |                                                                                                                                                                                                                                                                                                                                                                                                                                                                                                                                                                                                                                                                                                                                                                                          |                                                                                                                                                                                                                                                                                                                                                                                                                                                                                                                                                                                                                                                                                                                                                                                                                                                            |           |
|----------------------------------|---------------------------------------------------------------------------------------------------------------------------------------------------------------------------|----------------------------------------------------------------------------------------------------------------------------------------------------------------------------------------------------------------------------------------------------------------------------------------------------------------------------------------------------------------------------------------------------------------------------------------------------------------------------------------------------------------------------|---------------------------------------------------------------------------------------------------------------------------------------------------------------------------------------------------------------------------|------------------------------------------------------------------------------------------------------------------------------------------------------------------------------------------------------------------------------------------------------------------------------------------------------------------------------------------------------------------------------------------------------------------------------------------------------------------------------------------------------------------------------------------------------------------------------------------------------------------------------------------------------------------------------------------------------------------------------------------------------------------------------------------------------------------------------------------------------------------------------------------------------------------------------------------------------------------------------------------------------------------------------------------------------------------------------------------------------------|-------------------------------------------------------------------------------------------------------------------------------------------------------------------------------------------------------------------------------------------------------------------------------------------------------------------------------------------------------|------------------------------------------------------------------------------------------------------------------------------------------------------------------------------------------------------------------------------------------------------------------------------------------------------------------------------------------------------------------------------------------------------------------------------------------------------------------------------------------------------------------------------------------------------------------------------------------------------------------------------------------------------------------------------------------------------------------------------------------------------------------------------------------|------------------------------------------------------------------------------------------------------------------------------------------------------------------------------------------------------------------------------------------------------------------------------------------------------------------------------------------------------------------------------------------------------------------------------------------------------------------------------------------------------------------------------------------------------------------------------------------------------------------------------------------------------------------------------------------------------------------------------------------------------------------------------------------------------------------------------------------------------------|-----------|
| <p>Krieger et al. 2000 (266)</p> | <p>Design:<br/>CCT</p> <p>Group allocation:<br/>Experimental study with participants allocated to treatment and control groups.</p> <p>Follow-up period:<br/>Unclear.</p> | <p>Number of patients: 1246</p> <p><u>Group 1</u><br/>Number of patients: 622<br/>Female/male: 266/356<br/>Age (mean(sd)): 75.1 (sd not reported)</p> <p><u>Control group</u><br/>Number of patients: 624<br/>Female/male: 298/326<br/>Age (mean(sd)): 75.6 (sd not reported)</p> <p><u>Eligibility criteria:</u><br/>Participants aged 65 years or older, residing in the senior center's service area. Patients were eligible for pneumococcal vaccination only without a previous pneumococcal vaccination history.</p> | <p>Number of sites: 1 senior center in an urban low-income area</p> <p>Site affiliation: Private community delivery system</p> <p>Number of practices or physicians: None</p> <p>Location: United States (Washington)</p> | <p>education / reminders, as above.</p> <p><u>Patient reminder letters and telephone outreach vs usual care</u></p> <p>Intervention aim: Improve vaccination rates<br/>QI agent: Seniors center</p> <p><u>Group 1</u></p> <p>Community engagement: The research orientation was participatory action research. Senior center staff and members collaborated with researchers in project design, implementation and evaluation, and shared direction.</p> <p>Patient education / reminders: Each participant was mailed an educational brochure with a postage paid reply card for tracking immunization status.</p> <p>Patient education / reminders:<br/>Volunteers called participants if the reply card had not been returned or if the card indicated that immunization was lacking.</p> <p>Electronic patient registry: The project coordinator used a computer registry to track the contact and immunization status of each participant.</p> <p><u>Control group</u></p> <p>Usual senior center and community immunization promotion activities (i.e.: newsletter articles, health fairs, etc.)</p> | <p><u>Influenza</u><br/>Proportion of eligible patients receiving vaccination</p> <p>Risk and odds ratios of receiving vaccination between treatment and control groups</p> <p><u>Pneumococcal</u><br/>Proportion of eligible patients receiving vaccination</p> <p>Risk/odds ratio of receiving vaccination between treatment and control groups</p> | <p><u>Influenza</u><br/>Baseline<br/>Group 1: 487/622<br/>Control: 518/624</p> <p>Follow-up<br/>Overall<br/>Group 1: 446/503 (87%)<br/>Control: 435/528 (82%)</p> <p>Patients not previously immunized<br/>Group 1: 51/102 (50%)<br/>Control: 21/91 (23%)</p> <p>Patients previously immunized<br/>Group 1: 395/401 (99%)<br/>Control: 414/437 (95%)</p> <p>Follow-up<br/>Patients not previously immunized<br/>OR = 3.33<br/>P = &lt;0.001</p> <p>Patients previously immunized<br/>OR = 3.66<br/>P = 0.004</p> <p>Adjusted odds ratio*<br/>OR = 3.80<br/>95% CI = [2.2, 6.5]</p> <p><u>Pneumococcal</u><br/>Baseline<br/>Group 1: 259/622<br/>Control: 253/624</p> <p>Follow-up<br/>Group 1: 170/327 (52%)<br/>Control: 112/363 (31%)</p> <p>Follow-up<br/>RR = 1.69<br/>OR = 6.68</p> | <p>An intervention consisting of an educational mailing followed by tracking and outreach by volunteers was effective in increasing pneumococcal and influenza immunization levels among an ethnically diverse, inner-city group of senior citizens.</p> <p>The intervention had its greatest effect on influenza immunization rates among participants who had not received an immunization in the prior year.</p> <p>The immunization achieved an influenza immunization rate 88.2%, which exceed previously suggested ceiling rates.</p> <p>Program costs were \$205 per additional pneumococcal and \$38 per additional influenza vaccination delivered. Program costs may be decreased by targeted on seniors who had not previously been vaccinated.</p> <p>* Adjusted for previous immunization history, perceived primary health care provider</p> | <p>23</p> |
|----------------------------------|---------------------------------------------------------------------------------------------------------------------------------------------------------------------------|----------------------------------------------------------------------------------------------------------------------------------------------------------------------------------------------------------------------------------------------------------------------------------------------------------------------------------------------------------------------------------------------------------------------------------------------------------------------------------------------------------------------------|---------------------------------------------------------------------------------------------------------------------------------------------------------------------------------------------------------------------------|------------------------------------------------------------------------------------------------------------------------------------------------------------------------------------------------------------------------------------------------------------------------------------------------------------------------------------------------------------------------------------------------------------------------------------------------------------------------------------------------------------------------------------------------------------------------------------------------------------------------------------------------------------------------------------------------------------------------------------------------------------------------------------------------------------------------------------------------------------------------------------------------------------------------------------------------------------------------------------------------------------------------------------------------------------------------------------------------------------|-------------------------------------------------------------------------------------------------------------------------------------------------------------------------------------------------------------------------------------------------------------------------------------------------------------------------------------------------------|------------------------------------------------------------------------------------------------------------------------------------------------------------------------------------------------------------------------------------------------------------------------------------------------------------------------------------------------------------------------------------------------------------------------------------------------------------------------------------------------------------------------------------------------------------------------------------------------------------------------------------------------------------------------------------------------------------------------------------------------------------------------------------------|------------------------------------------------------------------------------------------------------------------------------------------------------------------------------------------------------------------------------------------------------------------------------------------------------------------------------------------------------------------------------------------------------------------------------------------------------------------------------------------------------------------------------------------------------------------------------------------------------------------------------------------------------------------------------------------------------------------------------------------------------------------------------------------------------------------------------------------------------------|-----------|

|                          |                                                                                                                                                                          |                                                                                                                                                                                                                                                                                                                                                                                                                                                                                                                                                                                                                  |                                                                                                                                                                                                      |                                                                                                                                                                                                                                                                                                                                                                                                                                                                                                                                                                                                                                                                                                                                                                                                                                                                                                                                                       |                                                                                                                                                                                                                                                                                                                                                      |                                                                                                                                                                                                                                                                                                                                                                                                                                                                                                                                                                                                                                                                                                                 |                                                                                                                                                                                                                                                                                                                                                                                                                                                                                                       |    |
|--------------------------|--------------------------------------------------------------------------------------------------------------------------------------------------------------------------|------------------------------------------------------------------------------------------------------------------------------------------------------------------------------------------------------------------------------------------------------------------------------------------------------------------------------------------------------------------------------------------------------------------------------------------------------------------------------------------------------------------------------------------------------------------------------------------------------------------|------------------------------------------------------------------------------------------------------------------------------------------------------------------------------------------------------|-------------------------------------------------------------------------------------------------------------------------------------------------------------------------------------------------------------------------------------------------------------------------------------------------------------------------------------------------------------------------------------------------------------------------------------------------------------------------------------------------------------------------------------------------------------------------------------------------------------------------------------------------------------------------------------------------------------------------------------------------------------------------------------------------------------------------------------------------------------------------------------------------------------------------------------------------------|------------------------------------------------------------------------------------------------------------------------------------------------------------------------------------------------------------------------------------------------------------------------------------------------------------------------------------------------------|-----------------------------------------------------------------------------------------------------------------------------------------------------------------------------------------------------------------------------------------------------------------------------------------------------------------------------------------------------------------------------------------------------------------------------------------------------------------------------------------------------------------------------------------------------------------------------------------------------------------------------------------------------------------------------------------------------------------|-------------------------------------------------------------------------------------------------------------------------------------------------------------------------------------------------------------------------------------------------------------------------------------------------------------------------------------------------------------------------------------------------------------------------------------------------------------------------------------------------------|----|
|                          |                                                                                                                                                                          |                                                                                                                                                                                                                                                                                                                                                                                                                                                                                                                                                                                                                  |                                                                                                                                                                                                      |                                                                                                                                                                                                                                                                                                                                                                                                                                                                                                                                                                                                                                                                                                                                                                                                                                                                                                                                                       |                                                                                                                                                                                                                                                                                                                                                      | <p>P &lt; 0.01</p> <p>Adjusted odds ratio**<br/>OR = 2.56<br/>95% CI [1.57, 4.68]</p> <p>*, ** See notes in the next column, at right.</p>                                                                                                                                                                                                                                                                                                                                                                                                                                                                                                                                                                      | <p>interest, and self-reported health status</p> <p>** Adjusted for primary care provider interest, and patient income.</p>                                                                                                                                                                                                                                                                                                                                                                           |    |
| Larson et al. 1982 (267) | <p>Design:<br/>CCT</p> <p>Group allocation:<br/>Experimental with patients randomly allocated to treatment and control groups.</p> <p>Follow-up period:<br/>Unclear.</p> | <p>Number of patients: 395<br/>(283 patients were available for analysis, enumerated below.)</p> <p><u>Group 1</u><br/>Number of patients: 70<br/>Female: 69%<br/>Age (mean(sd)): 68.1 (14.4)</p> <p><u>Group 2</u><br/>Number of patients: 61<br/>Female: 63%<br/>Age (mean(sd)): 63.8 (19.6)</p> <p><u>Group 3</u><br/>Number of patients: 68<br/>Female: 75%<br/>Age (mean(sd)): 66.5 (16.1)</p> <p><u>Control group</u><br/>Number of patients: 84<br/>Female: 65%<br/>Age (mean(sd)): 68.0 (15.4)</p> <p><u>Eligibility criteria:</u><br/>Patients 65 years or older or patients with chronic diseases.</p> | <p>Number of sites: 1<br/>academic family medicine centre</p> <p>Site affiliation: University</p> <p>Number of practices or physicians: Not reported</p> <p>Location: United States (Washington)</p> | <p><u>Patient reminder postcard based on HBM theory vs neutral patient reminder postcard vs personalized patient reminder postcard vs usual care</u></p> <p>Intervention aim: Improve vaccination rates<br/>QI agent: Medical clinic</p> <p><u>Group 1</u><br/>Patient education reminders: Patients were mailed a postcard that emphasized the severity of influenza, the susceptibility of older persons to vaccination, and the benefits of vaccination. The postcard was designed according to the Health Belief Model.</p> <p><u>Group 2</u><br/>Patient education / reminders: Patients received a neutral postcard, informing patients of the availability of influenza vaccination.</p> <p><u>Group 3</u><br/>Patient education / reminders: Patients received a personal post card, in which the patient is named and the influenza vaccination is endorsed by her or his personal physician.</p> <p><u>Control group</u><br/>Usual care</p> | <p><u>Influenza</u><br/>Proportion of eligible patients receiving vaccination</p> <p>Odds ratio of receiving vaccination between treatment and control groups (crude estimates calculated by present reviewers)</p> <p>Proportion of eligible patients receiving vaccination, adjusted for age and vaccination experience in the previous year *</p> | <p><u>Influenza</u><br/>Follow-up (Crude)<br/>Group 1: 36/70 (51%)<br/>Group 2: 17/68 (25%)<br/>Group 3: 26/61 (41%)<br/>Control: 17/84 (20%)</p> <p>Follow-up<br/>Group 1<br/>OR = 4.17<br/>P &lt; 0.001</p> <p>Group 2<br/>OR = 1.31<br/>P = 0.56</p> <p>Group 3<br/>OR = 2.93<br/>P = 0.005</p> <p>Follow -up<br/>Results adjusted for age and vaccination experience in the previous year<br/>Group 1: 24%<br/>Group 2: 11%<br/>Group 3: 14%<br/>Control: 10%</p> <p>Tests of significance, after adjusting for age and vaccination status<br/>Group 1 vs control<br/>P &lt; 0.025<br/>Group 1 vs group 2<br/>P &lt; 0.05<br/>All other comparisons reported as either p &gt; 0.05 (NS) or p &lt; 0.25.</p> | <p>The Health Belief Model-based postcard was more effective than either no postcard or the neutral postcard.</p> <p>A personal postcard, designed to provide a message from the patient's personal physician, was effective in the crude analysis, but not more effective after adjusting for age and prior vaccination experience.</p> <p>Prior vaccination experience is an important potential confounder of intervention effect and should be measured even in randomized controlled trials.</p> | 19 |

Online Supplementary Data

http://www.annfammed.org/content/10/6/538/DC1

|                           |                                                                                                                                                                                                  |                                                                                                                                                                                                                                                                                                                                                                                                                                                                                                                                                                                                                                                     |                                                                                                                                                                                                                                                                                                                                                                                                                                                                                                                           |                                                                                                                                                                                                                                                                                                                                                                                                                                                                                                                                                                                                                                                                                                                                                                                                                                                                                                                                                                                                                                                                                  |                                                                                                                                                                                                                |                                                                                                                                                                                                                                                                        |                                                                                                                                                                                                            |    |
|---------------------------|--------------------------------------------------------------------------------------------------------------------------------------------------------------------------------------------------|-----------------------------------------------------------------------------------------------------------------------------------------------------------------------------------------------------------------------------------------------------------------------------------------------------------------------------------------------------------------------------------------------------------------------------------------------------------------------------------------------------------------------------------------------------------------------------------------------------------------------------------------------------|---------------------------------------------------------------------------------------------------------------------------------------------------------------------------------------------------------------------------------------------------------------------------------------------------------------------------------------------------------------------------------------------------------------------------------------------------------------------------------------------------------------------------|----------------------------------------------------------------------------------------------------------------------------------------------------------------------------------------------------------------------------------------------------------------------------------------------------------------------------------------------------------------------------------------------------------------------------------------------------------------------------------------------------------------------------------------------------------------------------------------------------------------------------------------------------------------------------------------------------------------------------------------------------------------------------------------------------------------------------------------------------------------------------------------------------------------------------------------------------------------------------------------------------------------------------------------------------------------------------------|----------------------------------------------------------------------------------------------------------------------------------------------------------------------------------------------------------------|------------------------------------------------------------------------------------------------------------------------------------------------------------------------------------------------------------------------------------------------------------------------|------------------------------------------------------------------------------------------------------------------------------------------------------------------------------------------------------------|----|
|                           |                                                                                                                                                                                                  |                                                                                                                                                                                                                                                                                                                                                                                                                                                                                                                                                                                                                                                     |                                                                                                                                                                                                                                                                                                                                                                                                                                                                                                                           |                                                                                                                                                                                                                                                                                                                                                                                                                                                                                                                                                                                                                                                                                                                                                                                                                                                                                                                                                                                                                                                                                  | <p><u>Pneumococcal</u><br/>Not targeted.</p> <p>* Proportions estimated for a 65 year old patient with no vaccination the year before. Precision of results is not provided.</p>                               | <p><u>Pneumococcal</u><br/>Not targeted.</p>                                                                                                                                                                                                                           |                                                                                                                                                                                                            |    |
| Latessa et al. 2000 (268) | <p>Design:<br/>Cluster-CBA</p> <p>Group allocation:<br/>Four family practice center practice “modules” were allocated to treatment and control groups.</p> <p>Follow-up period:<br/>6 months</p> | <p>Number of patients: 778</p> <p><u>Group 1</u><br/>Number of patients: 205<br/>Female/male: 130/75</p> <p><u>Group 2</u><br/>Number of patients: 187<br/>Female/male: 129/58</p> <p><u>Control group*</u><br/>Number of patients: 386<br/>Female/male: 245/141</p> <p><u>Eligibility criteria:</u><br/>Patients aged 65 years or older, or patients aged 2-64 with diabetes. Patients had not previously received pneumococcal vaccination.</p> <p><u>Exclusion:</u> Patients receiving care at a “module” other than the one in which they usually receive care.</p> <p>* Two control groups were collapsed into a single group at analysis.</p> | <p>Site description:<br/>University family practice center</p> <p>Site affiliation: University</p> <p>Number of sites: 1<br/>academic family practice center</p> <p>Number of practices or physicians: 21 attending physicians, 34 family practice residents, and 4 nurse practitioners / physician assistants divided into 4 practice “modules”*</p> <p>Location: United States (North Carolina)</p> <p>* Family practice modules were allocated to group 1 (1 module), group 2 (1 module), and control (2 modules).</p> | <p><u>Clinician chart reminder stickers and patient reminder office sign developed as a result of a CQI process vs patient reminder office sign only vs usual care</u></p> <p>Intervention aim: Improve vaccination rates<br/>QI agent: Medical practices</p> <p><u>Group 1</u></p> <p>CQI (or similar): A team of two family practice residents and a nurse met monthly over 3 months. During this time, the team was introduced to CQI methods, identified potential causes of low pneumococcal vaccination rates, investigated causes with patient and clinician surveys, and developed a two-pronged strategy for addressing low vaccination rates.</p> <p>Clinician reminder: Nurses placed a “Pneumovax needed?” sticker on physicians’ work-up sheets if the patient met criteria for vaccination.</p> <p>Patient education / reminders: A sign was placed in each examination room prompting patients to inquire about pneumococcal vaccination.</p> <p><u>Group 2</u></p> <p>Patient education / reminders: As above.</p> <p><u>Control group</u></p> <p>Usual care</p> | <p><u>Influenza</u><br/>Not targeted.</p> <p><u>Pneumococcal</u><br/>Proportion of eligible patients receiving vaccination</p> <p>Odds ratio of receiving vaccination between treatment and control groups</p> | <p><u>Influenza</u><br/>Not targeted.</p> <p><u>Pneumococcal</u><br/>Follow-up<br/>Group 1: 42/205 (20%)<br/>Group 2: 21/187 (11%)<br/>Control: 27/386 (7%)</p> <p>Follow-up<br/>Group 1<br/>OR = 3.43<br/>P &lt; 0.001</p> <p>Group 2<br/>OR = 1.68<br/>P = 0.086</p> | <p>A simple intervention, developed as a result of a CQI process designed to impact the office patterns of primary care physicians, can produce measureable changes in pneumococcal vaccination rates.</p> | 20 |

Online Supplementary Data

http://www.annfammed.org/content/10/6/538/DC1

|                                  |                                                                                                                                                                                                                                                                                                                                           |                                                                                                                                                                                                                                                                                                                                                                                                                                                                             |                                                                                                                                                                                                        |                                                                                                                                                                                                                                                                                                                                                                                                                                                                                                                                                                                                                                                                                                                                                                                                                                                                                                                                       |                                                                                                                                                                                                                                                                                                                                                                                                                                                                                |                                                                                                                                                                                                                                                                                                                                                                                                                                                                                                                                                                                                                                                                          |                                                                                                                                                                                                                                                                                                                                                                                                                                                                                                                                       |           |
|----------------------------------|-------------------------------------------------------------------------------------------------------------------------------------------------------------------------------------------------------------------------------------------------------------------------------------------------------------------------------------------|-----------------------------------------------------------------------------------------------------------------------------------------------------------------------------------------------------------------------------------------------------------------------------------------------------------------------------------------------------------------------------------------------------------------------------------------------------------------------------|--------------------------------------------------------------------------------------------------------------------------------------------------------------------------------------------------------|---------------------------------------------------------------------------------------------------------------------------------------------------------------------------------------------------------------------------------------------------------------------------------------------------------------------------------------------------------------------------------------------------------------------------------------------------------------------------------------------------------------------------------------------------------------------------------------------------------------------------------------------------------------------------------------------------------------------------------------------------------------------------------------------------------------------------------------------------------------------------------------------------------------------------------------|--------------------------------------------------------------------------------------------------------------------------------------------------------------------------------------------------------------------------------------------------------------------------------------------------------------------------------------------------------------------------------------------------------------------------------------------------------------------------------|--------------------------------------------------------------------------------------------------------------------------------------------------------------------------------------------------------------------------------------------------------------------------------------------------------------------------------------------------------------------------------------------------------------------------------------------------------------------------------------------------------------------------------------------------------------------------------------------------------------------------------------------------------------------------|---------------------------------------------------------------------------------------------------------------------------------------------------------------------------------------------------------------------------------------------------------------------------------------------------------------------------------------------------------------------------------------------------------------------------------------------------------------------------------------------------------------------------------------|-----------|
| <p>Leirer et al. 1989 (269)</p>  | <p>Design: RCT*<br/><br/>Group allocation: Elderly individuals were randomly allocated to voice-mail reminder or no reminder groups.*<br/><br/>Follow-up period: 1 week<br/><br/>* Additionally, individuals were analyzed in observational strata defined by exposure to repeated posted or verbal vaccination clinic announcements.</p> | <p>Number of patients: 321 patients originally allocated, 184 patients at analysis.<br/>Age and gender distributions not reported.<br/><br/><u>Group 1</u><br/>Number of patients: 68<br/><br/><u>Group 2</u><br/>Number of patients: 25<br/><br/><u>Group 3</u><br/>Number of patients: 24<br/><br/><u>Group 4</u><br/>Number of patients: 65<br/><br/><u>Eligibility criteria:</u> Individuals aged 65 years or older who attended a lunch program at the study site.</p> | <p>Number of sites: 1 seniors center<br/><br/>Site affiliation: Community seniors center<br/><br/>Number of practices or physicians: Not applicable.<br/><br/>Location: United States (California)</p> | <p><u>Voice-mail reminders vs no voice-mail reminders, and repeated verbal/posted announcements vs no exposure to repeated announcements</u><br/><br/>Intervention aim: Improve vaccination rates<br/>QI agent: Community seniors center<br/><br/><u>Group 1</u><br/><br/>Patient education / reminders: Patients received voice-mail messages, but were not exposed to announcements.<br/><br/><u>Group 2</u><br/><br/>Patient education / reminders: Patients were exposed to repeated posted and verbal announcements about influenza vaccination at the seniors center.<br/><br/><u>Group 3</u><br/><br/>Patient education / reminders: An auto-dialer computer called eligible individuals with a voice-mail reminder of the time, place, and cost of an upcoming influenza vaccination clinic. Additionally, patients were exposed to senior center announcements about the clinic.<br/><br/><u>Control</u><br/>Usual care.</p> | <p><u>Influenza</u><br/>Proportion of eligible patients receiving vaccination<br/><br/>Odds ratio of receiving vaccination between voice-mail reminder and no-reminder groups *<br/><br/>Odds ratio of receiving vaccination between announcement-exposed and un-exposed groups**<br/><br/><u>Pneumococcal</u><br/>Not targeted.<br/><br/>* Randomized comparison<br/>** Non-random comparison – high risk of bias due to sampling from potentially different populations.</p> | <p><u>Influenza</u><br/>Follow-up<br/>Group 1: 8/68 (12%)<br/>Group 2: 2/27 (7%)<br/>Group 3: 9/24 (38%)<br/>Control: 1/65 (2%)<br/><br/>Voicemail reminder vs no reminder*<br/>... Among patients with announcement exposure<br/>OR = 7.50<br/>P &lt; 0.01<br/><br/>... Among patients with no announcement exposure<br/>OR = 8.73<br/>P &lt; 0.025<br/><br/>Announcements vs no announcement exposure**<br/>... Among voice-mail reminder groups<br/>OR = 4.50<br/>P &lt; 0.01<br/><br/>... Among groups without voice-mail reminders<br/>OR = 5.12<br/>P = 0.05 (NS)<br/><br/><u>Pneumococcal</u><br/>Not targeted.<br/><br/>* and ** notes: See previous column.</p> | <p>Voice-mail reminders increased adherence to influenza vaccinations at a scheduled vaccination clinic among community elderly individuals.<br/><br/>Exposure to repeat posted and verbal announcements also improved vaccination rates. However, this conclusion is based on an observational comparison and should be taken with caution due to high risk of bias. Announcements did not significantly increase adherence among patients who did not receive a voice-mail reminder, but this is likely due to low sample size.</p> | <p>18</p> |
| <p>Lemelin et al. 2001 (270)</p> | <p>Design: Cluster-RCT<br/><br/>Group allocation: Experimental study with general practices allocated to treatment and control groups</p>                                                                                                                                                                                                 | <p>Number of patients: 2500 patient charts reviewed.<br/><br/><u>Group 1</u><br/>Number of patients: 2200 patient charts reviewed.<br/><br/><u>Control group</u><br/>Number of patients: 2300</p>                                                                                                                                                                                                                                                                           | <p>Number of sites: 56 private practices affiliated with Ontario Health Services Organizations<br/><br/>Site affiliation: Private practices<br/><br/>Number of practices or</p>                        | <p><u>Multifaceted QI facilitation in general practice vs usual care</u><br/><br/>Intervention aim: Improve preventive care<br/>QI agent: Medical clinics<br/><br/><u>Group 1</u></p>                                                                                                                                                                                                                                                                                                                                                                                                                                                                                                                                                                                                                                                                                                                                                 | <p><u>Influenza</u><br/>Proportion of eligible patients receiving vaccination, treated as a continuous performance score for each practice.</p>                                                                                                                                                                                                                                                                                                                                | <p><u>Influenza</u><br/>Baseline<br/>Group 1: 46.1%<br/>Control: 49.4%<br/><br/>Follow-up – 18 months<br/>Group 1: 64.8%<br/>Control: 53.4%</p>                                                                                                                                                                                                                                                                                                                                                                                                                                                                                                                          | <p>A tailored multifaceted approach delivered by nurse facilitators can significantly improve the preventive care performance of capitated primary care physicians. The rate of improvement in preventive care performance (11.5%) was modest. However, the potential effect of a 11.5%</p>                                                                                                                                                                                                                                           | <p>22</p> |

Online Supplementary Data

http://www.annfammed.org/content/10/6/538/DC1

|                          |                                                                                                                                                                            |                                                                                                                                                                                                                                                                                                                                              |                                                                                                                                                                                                                                                                                                                    |                                                                                                                                                                                                                                                                                                                                                                                                                                                                                                                                                                                                                                                                                                                                                                                                  |                                                                                                                                                                                                                                                                                                                                             |                                                                                                                                                                                                                                                                                                                                                                                  |                                                                                                                                                                                                                                                                                                                                              |    |
|--------------------------|----------------------------------------------------------------------------------------------------------------------------------------------------------------------------|----------------------------------------------------------------------------------------------------------------------------------------------------------------------------------------------------------------------------------------------------------------------------------------------------------------------------------------------|--------------------------------------------------------------------------------------------------------------------------------------------------------------------------------------------------------------------------------------------------------------------------------------------------------------------|--------------------------------------------------------------------------------------------------------------------------------------------------------------------------------------------------------------------------------------------------------------------------------------------------------------------------------------------------------------------------------------------------------------------------------------------------------------------------------------------------------------------------------------------------------------------------------------------------------------------------------------------------------------------------------------------------------------------------------------------------------------------------------------------------|---------------------------------------------------------------------------------------------------------------------------------------------------------------------------------------------------------------------------------------------------------------------------------------------------------------------------------------------|----------------------------------------------------------------------------------------------------------------------------------------------------------------------------------------------------------------------------------------------------------------------------------------------------------------------------------------------------------------------------------|----------------------------------------------------------------------------------------------------------------------------------------------------------------------------------------------------------------------------------------------------------------------------------------------------------------------------------------------|----|
|                          | Follow-up period:<br>18 months                                                                                                                                             | patient charts reviewed.<br><u>Eligibility criteria:</u><br>Not reported.                                                                                                                                                                                                                                                                    | physicians: 56 (23 in Group 1, 23 in Control)<br><br>Location: Canada (Ontario)                                                                                                                                                                                                                                    | Audit and feedback: Prevention facilitators presented baseline performance rates and performed mini-audits.<br><br>CQI (or similar): Prevention facilitators, i.e.: trained community health nurses, attended study practices and enlisted practice physicians in a process of quality improvement. Practice physicians and facilitators reviewed baseline performance, identified goals, and developed practice policies and written plans. Facilitators visited each practice an average of 33 times over 18 months.<br><br>Clinician education: Preventive care education in the form of seminars, guidelines, and a conference.<br><br>Clinician reminders: No further detail provided.<br><br>Patient reminders: No further detail provided.<br><br><u>Control group</u><br><br>Usual care. | Change in proportion of eligible patients receiving vaccination, treated as a continuous performance score for each practice.<br><br>Mean between-group difference in change scores from baseline performance, treated as a continuous outcome for each pharmacy, <i>diff.</i> (mean (95% CI)).<br><br><u>Pneumococcal</u><br>Not targeted. | Follow-up – 18 months<br>Change scores<br>Group 1: 18.7%<br>Control: 4.0%<br><br>Follow-up – 18 months<br>Difference: 14.7%<br>( $p < 0.05$ )<br><br><u>Pneumococcal</u><br>Not targeted.                                                                                                                                                                                        | improvement for 13 different interventions on an entire family practice panel may be considerable.                                                                                                                                                                                                                                           |    |
| Lennox et al. 2010 (271) | Design:<br>Cluster-RCT<br><br>Group allocation:<br>Experimental study with patient households allocated to treatment and control groups<br><br>Follow-up period:<br>1 year | Number of patients: 272 (242 at analysis)<br><br><u>Group 1</u><br>Number of patients: 53<br>Female/male: 21/32<br>Age (mean(sd)): 33 (11)<br><br><u>Group 2</u><br>Number of patients: 57<br>Female/male: 12/29<br>Age (mean(sd)): 37 (12)<br><br><u>Group 3</u><br>Number of patients: 70<br>Female/male: 27/43<br>Age (mean(sd)): 39 (14) | Number of sites: Patients were recruited from 48 community organizations<br><br>Site affiliation:<br>Community support and advocacy organizations for adults with disabilities<br><br>Number of practices or physicians: 140 general practitioners (35 general practices in each group)<br><br>Location: Australia | <u>Comprehensive health assessment tool vs health advocacy tool vs comprehensive health assessment tool and advocacy tool vs usual care</u><br><br>Intervention aim: Improve preventive care<br>QI agent: Medical clinic<br><br><u>Group 1: Comprehensive health assessment tool</u><br><br>Facilitated relay of clinical information: The comprehensive health assessment booklet elicited a thorough health history from patients and providers.<br><br>Clinician reminders: The comprehensive                                                                                                                                                                                                                                                                                                 | <u>Influenza</u><br>Proportion of eligible patients receiving vaccination<br><br><br><br><br><br><br><br><br>Odds ratio of receiving vaccination between treatment and control groups *                                                                                                                                                     | <u>Influenza</u><br>Baseline<br>Group 1: 17/53 (32%)<br>Group 2: 20/51 (39%)<br>Group 3: 29/70 (41%)<br>Control: 24/68 (35%)<br><br>Follow-up – 1 year<br>Group 1: 25/53 (47%)<br>Group 2: 20/51 (39%)<br>Group 3: 35/70 (50%)<br>Control: 22/68 (32%)<br><br>Follow-up – 1 year *<br>Group 1 vs control<br>OR = 1.87, $p = 0.07$<br>Group 2 vs control<br>OR = 1.35, $p = 0.28$ | The use of a comprehensive health assessment increased certain health promotion activities (e.g.: pneumococcal vaccinations, vision tests, but not influenza vaccinations) in adults with intellectual disabilities living in the community. In contrast, the use of a health advocacy tool did not improve measured health care activities. | 24 |

Online Supplementary Data

http://www.annfammed.org/content/10/6/538/DC1

|                            |                     |                                                                                                                                                                                                                                                                                                                                                                                       |                                           |                                                                                                                                                                                                                                                                                                                                                                                                                                                                                                                                                                                                                                                                                                                                                                                                                                                                                                                                                                                                                                                                                                                                                                                                                                                                                                                         |                                                                                                                                                                 |                                                                                                                                                                                                                                                                                                                                                                                                                                                                                                                                                                                              |                                                                                   |    |
|----------------------------|---------------------|---------------------------------------------------------------------------------------------------------------------------------------------------------------------------------------------------------------------------------------------------------------------------------------------------------------------------------------------------------------------------------------|-------------------------------------------|-------------------------------------------------------------------------------------------------------------------------------------------------------------------------------------------------------------------------------------------------------------------------------------------------------------------------------------------------------------------------------------------------------------------------------------------------------------------------------------------------------------------------------------------------------------------------------------------------------------------------------------------------------------------------------------------------------------------------------------------------------------------------------------------------------------------------------------------------------------------------------------------------------------------------------------------------------------------------------------------------------------------------------------------------------------------------------------------------------------------------------------------------------------------------------------------------------------------------------------------------------------------------------------------------------------------------|-----------------------------------------------------------------------------------------------------------------------------------------------------------------|----------------------------------------------------------------------------------------------------------------------------------------------------------------------------------------------------------------------------------------------------------------------------------------------------------------------------------------------------------------------------------------------------------------------------------------------------------------------------------------------------------------------------------------------------------------------------------------------|-----------------------------------------------------------------------------------|----|
|                            |                     | <p><u>Control group</u><br/>Number of patients: 68<br/>Female/male: 34/34<br/>Age (mean(sd)): 34 (11)</p> <p><u>Eligibility criteria:</u><br/>Adults with an intellectual disability, living in a private residence with family, alone, or with other individuals in a shared arrangement.<br/>Exclusions: Adults living with 24-hour support, participation in a previous trial.</p> |                                           | <p>health assessment booklet prompted providers to review patients' histories, perform a guided assessment of patients' health, and provide care for commonly missed health conditions.</p> <p><u>Group 2: Health advocacy tool</u></p> <p>Patient education / reminders: The health advocacy tool was a diary designed for ongoing use in all medical consultations. The diary was composed of four sections. An "all about me" section contained a record of personal details. "Health advocacy tips" provided advice on how patients should prepare for visits to the doctor and contained pages for charting symptoms over time. A "Fort eh Doctor" section prompted clinicians with checklists of health problems. A "medical records" section included diagnoses, operations, medications, and other medical details.</p> <p>Clinician reminders: The health advocacy tool contained a section of reminder checklists of common health problems faced by patients with intellectual disabilities.</p> <p><u>Group 3: Comprehensive health assessment tool and health advocacy tool</u></p> <p>Patient education / reminders: As in group 2.</p> <p>Facilitated relay of clinical information: As in group 1.</p> <p>Clinician reminders: As in groups 1 and 2.</p> <p><u>Control group</u></p> <p>Usual care.</p> | <p>Pneumococcal<br/>Proportion of eligible patients receiving vaccination</p> <p>Odds ratio of receiving vaccination between treatment and control groups *</p> | <p>Group 3 vs control<br/>OR = 2.09, p = 0.03</p> <p><u>Pneumococcal</u><br/>Baseline<br/>Group 1: 4/53 (8%)<br/>Group 2: 2/51 (4%)<br/>Group 3: 18/70 (26%)<br/>Control: 7/68 (10%)</p> <p>Follow-up – 1 year<br/>Group 1: 6/53 (11%)<br/>Group 2: 2/51 (4%)<br/>Group 3: 8/70 (11%)<br/>Control: 0/68 (0%)</p> <p>Follow-up – 1 year * **<br/>Group 1 vs control<br/>OR = 17.36, p = 0.006<br/>Group 2 vs control<br/>OR = 5.55, p = 0.18<br/>Group 3 vs control<br/>OR = 17.55, p = 0.004</p> <p>* Unit of analysis error.<br/>** Odds ratio calculated by substituting 0.5 for zero.</p> |                                                                                   |    |
| Lobach et al. (1997) (272) | Design: Cluster-RCT | Number of patients: 359<br><br>Group 1                                                                                                                                                                                                                                                                                                                                                | Number of sites: 1 family medicine clinic | <u>Computer-assisted management vs usual care</u>                                                                                                                                                                                                                                                                                                                                                                                                                                                                                                                                                                                                                                                                                                                                                                                                                                                                                                                                                                                                                                                                                                                                                                                                                                                                       | <u>Influenza</u><br>Proportion of eligible encounters in which vaccination is provided,                                                                         | <u>Influenza</u><br>Follow-up<br>Group 1: 29.2%                                                                                                                                                                                                                                                                                                                                                                                                                                                                                                                                              | The computer-assisted management protocol was not associated with a statistically | 21 |



Online Supplementary Data

http://www.annfammed.org/content/10/6/538/DC1

|                           |                                                                                                                                               |                                                                                                                                                                                                                                                                                                                                                                                                                                           |                                                                                                                                                                                                                                                                                                                        |                                                                                                                                                                                                                                                                                                                                                                                                                                                                                                                                                                                                                                                                                                                                                                                                                                         |                                                                                                                                                                                                                                         |                                                                                                                                                                                                                                                                                                                                   |                                                                                                                                             |    |
|---------------------------|-----------------------------------------------------------------------------------------------------------------------------------------------|-------------------------------------------------------------------------------------------------------------------------------------------------------------------------------------------------------------------------------------------------------------------------------------------------------------------------------------------------------------------------------------------------------------------------------------------|------------------------------------------------------------------------------------------------------------------------------------------------------------------------------------------------------------------------------------------------------------------------------------------------------------------------|-----------------------------------------------------------------------------------------------------------------------------------------------------------------------------------------------------------------------------------------------------------------------------------------------------------------------------------------------------------------------------------------------------------------------------------------------------------------------------------------------------------------------------------------------------------------------------------------------------------------------------------------------------------------------------------------------------------------------------------------------------------------------------------------------------------------------------------------|-----------------------------------------------------------------------------------------------------------------------------------------------------------------------------------------------------------------------------------------|-----------------------------------------------------------------------------------------------------------------------------------------------------------------------------------------------------------------------------------------------------------------------------------------------------------------------------------|---------------------------------------------------------------------------------------------------------------------------------------------|----|
|                           | <p>Group allocation: Primary care clinicians were randomly allocated to treatment and control groups.</p> <p>Follow-up period: Unclear</p>    | <p>Number of patients: Not reported.</p> <p><u>Control group</u><br/>Number of patients: Not reported.</p> <p><u>Eligibility criteria:</u> Physicians were included if they practiced at the study clinic and saw at least 6 different diabetic patients over at least 12 clinical encounters during the study period.</p>                                                                                                                | <p>Site affiliation: University</p> <p>Number of practices or physicians: 30 primary care clinicians (family physician faculty members and family medicine residents)*</p> <p>Location: United States (North Carolina)</p> <p>* 16 and 14 clinicians were allocated to treatment and control groups, respectively.</p> | <p>Intervention aim: Improve care of diabetes<br/>QI agent: Medical clinic</p> <p><u>Group 1</u></p> <p>Clinician reminders: A computer program automatically generated a diabetes-specific clinical encounter form based on data from the patients' electronic medical record. The form included care recommendations advising the clinician on procedures and studies that should be ordered.</p> <p><u>Control group</u></p> <p>Usual care.</p>                                                                                                                                                                                                                                                                                                                                                                                      | <p>taken as a continuous performance score per physician (median)</p> <p><u>Pneumococcal</u><br/>Proportion of eligible encounters in which vaccination is provided, taken as a continuous performance score per physician (median)</p> | <p>Control: 22.7%</p> <p>Test of significance<br/>P &gt; 0.1 (Wilcoxon rank sum test)</p> <p><u>Pneumococcal</u><br/>Follow-up<br/>Group 1: 19.8%<br/>Control: 0.0%</p> <p>Test of significance<br/>P &gt; 0.1 (Wilcoxon rank sum test)</p>                                                                                       | <p>significant rise in vaccination rates. However, performance rates improved significantly for 3 of 8 diabetes care guidelines tested.</p> |    |
| Lukasik et al. 1987 (273) | <p>Design: CCT</p> <p>Group allocation: Patients were randomly allocated to treatment and control groups.</p> <p>Follow-up period: 1 year</p> | <p>Number of patients: 243<br/>Age and gender distributions not reported.</p> <p><u>Group 1</u><br/>Number of patients: 120</p> <p><u>Control group</u><br/>Number of patients: 123</p> <p><u>Eligibility criteria:</u> Active registered patient in the practice, aged 65 years or older.<br/>Exclusions: Chronically hospitalized, nursing home patients, and housebound patients, and patients unable to communicate by telephone.</p> | <p>Number of sites: 1 academic family medical practice</p> <p>Site affiliation: University</p> <p>Number of practices or physicians: 1 attending physician, 2 residents, 2 nursing staff</p> <p>Location: Canada (Ontario)</p>                                                                                         | <p><u>Telephone patient outreach vs vaccination prompting at usual visits only</u></p> <p>Intervention aim: Improve vaccination rates<br/>QI agent: Medical clinics</p> <p><u>Group 1</u></p> <p>Patient education / reminders: Clinical staff telephoned patients. Patients were told that the influenza vaccine was available and that they could receive it during a regular appointment, or during a nurse-led vaccination clinic. Staff were provided with a list of 5 patients per week, which could be increased if all patients had been telephoned.</p> <p><u>Control group</u></p> <p>Patient education / reminders: All patients attending the practice, including intervention group patients, were informed by nursing staff that the vaccine was available. Physicians followed up on vaccinations during each visit.</p> | <p><u>Influenza</u><br/>Proportion of eligible patients receiving vaccination</p> <p>Odds ratio of receiving vaccination between treatment and control groups</p> <p><u>Pneumococcal</u><br/>Not targeted.</p>                          | <p><u>Influenza</u><br/>Baseline - 1983<br/>Group 1: 9/92 (10%)<br/>Control: 8/98 (8%)</p> <p>Baseline - 1984<br/>Group 1: 8/109 (7%)<br/>Control: 5/111 (5%)</p> <p>Follow-up<br/>Group 1: 61/120 (51%)<br/>Control: 33/123 (27%)</p> <p>Follow-up<br/>OR = 2.82<br/>P = 0.0002</p> <p><u>Pneumococcal</u><br/>Not targeted.</p> | <p>A practice immunization policy combined with a simple telephone outreach program improved vaccination rates in primary care.</p>         | 20 |

Online Supplementary Data

http://www.annfammed.org/content/10/6/538/DC1

|                                     |                                                                                                                                                                                 |                                                                                                                                                                                                                                                                                                                                                                                                                                                                                                                                                                                                  |                                                                                                                                                                                                                                          |                                                                                                                                                                                                                                                                                                                                                                                                                                                                                                                                                                                                                                                                                                                                                                                                                                                                                                                                                                                                                                                                                                                                                                                         |                                                                                                                                                                                                                                                                                                                                                                                                                                                                                                           |                                                                                                                                                                                                                                                                                                                                                                                                                                                                                                                                                                                                                                                                                                                                                                                                                                                               |                                                                                                                                                                                                                                                                                                                                                                                                                                                                                              |           |
|-------------------------------------|---------------------------------------------------------------------------------------------------------------------------------------------------------------------------------|--------------------------------------------------------------------------------------------------------------------------------------------------------------------------------------------------------------------------------------------------------------------------------------------------------------------------------------------------------------------------------------------------------------------------------------------------------------------------------------------------------------------------------------------------------------------------------------------------|------------------------------------------------------------------------------------------------------------------------------------------------------------------------------------------------------------------------------------------|-----------------------------------------------------------------------------------------------------------------------------------------------------------------------------------------------------------------------------------------------------------------------------------------------------------------------------------------------------------------------------------------------------------------------------------------------------------------------------------------------------------------------------------------------------------------------------------------------------------------------------------------------------------------------------------------------------------------------------------------------------------------------------------------------------------------------------------------------------------------------------------------------------------------------------------------------------------------------------------------------------------------------------------------------------------------------------------------------------------------------------------------------------------------------------------------|-----------------------------------------------------------------------------------------------------------------------------------------------------------------------------------------------------------------------------------------------------------------------------------------------------------------------------------------------------------------------------------------------------------------------------------------------------------------------------------------------------------|---------------------------------------------------------------------------------------------------------------------------------------------------------------------------------------------------------------------------------------------------------------------------------------------------------------------------------------------------------------------------------------------------------------------------------------------------------------------------------------------------------------------------------------------------------------------------------------------------------------------------------------------------------------------------------------------------------------------------------------------------------------------------------------------------------------------------------------------------------------|----------------------------------------------------------------------------------------------------------------------------------------------------------------------------------------------------------------------------------------------------------------------------------------------------------------------------------------------------------------------------------------------------------------------------------------------------------------------------------------------|-----------|
| <p>Maljanian et al., 2005 (274)</p> | <p>Design:<br/>CCT</p> <p>Group allocation:<br/>Experimental study with patients randomly allocated to treatment and control groups.</p> <p>Follow-up period:<br/>12 months</p> | <p>Number of patients: 507 (336 patients were available at analysis, enumerated below.)</p> <p><u>Group 1</u><br/>Number of patients: 176<br/>Female/male: 99/77<br/>Age (mean(sd)): 57.0 (12.1) years</p> <p><u>Control group</u><br/>Number of patients: 160<br/>Female/male: 80/80<br/>Age (mean(sd)): 59.2 (13.4) years</p> <p><u>Eligibility criteria:</u> Patients with type 1 or type 2 diabetes referred to the hospital-based disease management program. Individuals without telephones, or who were unable to complete interviews or surveys in English or Spanish were excluded.</p> | <p>Number of sites: 1 hospital-based disease management program</p> <p>Site affiliation: Private disease management organization</p> <p>Number of practices or physicians: Not reported</p> <p>Location: United States (Connecticut)</p> | <p><u>Disease management program with intensive telephone education and follow-up versus disease management program alone</u></p> <p>Intervention aim: Improve diabetes care<br/>QI agent: Disease management program</p> <p><u>Group 1</u></p> <p>Patient education: Three 4-hr educational classes covering diverse diabetes health promotion topics were provided to patients. Intervention group patients received a series of 12 weekly phone calls to reinforce education and self-management skills. Calls were delivered by a trained research nurse, and focused on glycemic control, prevention of complications, and exacerbation of co morbidities. Calls were 5-7 minutes each, excepting the first call, which was 15-20 minutes in length.</p> <p>Team change: Patients had individual visits with a registered nurse and nutritionist.</p> <p>Case management: Diabetes team members provided written evaluations and recommendations to the patient's primary care provider, and scheduled follow-up as needed.</p> <p><u>Control group</u></p> <p>Team change and case management, as above.</p> <p>Patient education: As above, without the telephone component.</p> | <p><u>Influenza</u><br/>Proportion of eligible patients receiving vaccination during influenza season</p> <p>Odds ratio of receiving vaccination between treatment and control groups</p> <p><u>Pneumococcal</u><br/>Proportion of eligible patients receiving vaccination during influenza season</p> <p>Odds ratio of receiving vaccination between treatment and control groups *</p> <p>* Calculated by logistic regression adjusting for baseline BMI, glycemic control, and vaccination status.</p> | <p><u>Influenza</u><br/>Baseline<br/>Not reported</p> <p>3 months*<br/>Group 1: 33/62 (53%)<br/>Control: 37/91 (41%)<br/>No significant differences.</p> <p>12 months*<br/>Group 1: 95/176 (36%)<br/>Control: 75/160 (47%)<br/>No significant differences.</p> <p>12 months<br/>OR = 1.33<br/>P = 0.23</p> <p><u>Pneumococcal</u><br/>Baseline<br/>Not reported</p> <p>3 months<br/>Group 1: 28/106 (26%)<br/>Control: 10/97 (10%)<br/>P &lt; 0.005</p> <p>12 months<br/>Group 1: 42/106 (40%)<br/>Control: 23/97 (24%)<br/>P &lt; 0.02</p> <p>3 months<br/>OR = 2.74<br/>P &lt; 0.015</p> <p>12 months<br/>OR = 1.96<br/>P &lt; 0.039</p> <p>* Denominators at 3 months were comprised of patients attending an office visit during the influenza season. Denominators at 12 months were "cumulative", comprised of all patients remaining in the study.</p> | <p>This study examined the incremental effect of an intensive telephone intervention added on to a hospital-based diabetes disease management program already known to promote glycemic control. The addition of the telephone intervention improved adherence for foot and eye exams, and for pneumonia vaccinations, but did not result in additional improvements in other ADA guidelines, in glycemic control, HRQoL, diabetes QoL, depression symptoms, or in patient satisfaction.</p> | <p>21</p> |
|-------------------------------------|---------------------------------------------------------------------------------------------------------------------------------------------------------------------------------|--------------------------------------------------------------------------------------------------------------------------------------------------------------------------------------------------------------------------------------------------------------------------------------------------------------------------------------------------------------------------------------------------------------------------------------------------------------------------------------------------------------------------------------------------------------------------------------------------|------------------------------------------------------------------------------------------------------------------------------------------------------------------------------------------------------------------------------------------|-----------------------------------------------------------------------------------------------------------------------------------------------------------------------------------------------------------------------------------------------------------------------------------------------------------------------------------------------------------------------------------------------------------------------------------------------------------------------------------------------------------------------------------------------------------------------------------------------------------------------------------------------------------------------------------------------------------------------------------------------------------------------------------------------------------------------------------------------------------------------------------------------------------------------------------------------------------------------------------------------------------------------------------------------------------------------------------------------------------------------------------------------------------------------------------------|-----------------------------------------------------------------------------------------------------------------------------------------------------------------------------------------------------------------------------------------------------------------------------------------------------------------------------------------------------------------------------------------------------------------------------------------------------------------------------------------------------------|---------------------------------------------------------------------------------------------------------------------------------------------------------------------------------------------------------------------------------------------------------------------------------------------------------------------------------------------------------------------------------------------------------------------------------------------------------------------------------------------------------------------------------------------------------------------------------------------------------------------------------------------------------------------------------------------------------------------------------------------------------------------------------------------------------------------------------------------------------------|----------------------------------------------------------------------------------------------------------------------------------------------------------------------------------------------------------------------------------------------------------------------------------------------------------------------------------------------------------------------------------------------------------------------------------------------------------------------------------------------|-----------|

Online Supplementary Data

http://www.annfammed.org/content/10/6/538/DC1

|                                   |                                                                                                                                                                                                                                                                                                      |                                                                                                                                                                                                                                                                                                                                     |                                                                                                                                                                                                                                                                                                                                                                       |                                                                                                                                                                                                                                                                                                                                                                                                                                                                                                                                                                                                                                                                                     |                                                                                                                                                                                                                        |                                                                                                                                                                                                                                                                                                                                                                                                       |                                                                                                                                                                                                                                                                                                                                                                                                                                                                                  |           |
|-----------------------------------|------------------------------------------------------------------------------------------------------------------------------------------------------------------------------------------------------------------------------------------------------------------------------------------------------|-------------------------------------------------------------------------------------------------------------------------------------------------------------------------------------------------------------------------------------------------------------------------------------------------------------------------------------|-----------------------------------------------------------------------------------------------------------------------------------------------------------------------------------------------------------------------------------------------------------------------------------------------------------------------------------------------------------------------|-------------------------------------------------------------------------------------------------------------------------------------------------------------------------------------------------------------------------------------------------------------------------------------------------------------------------------------------------------------------------------------------------------------------------------------------------------------------------------------------------------------------------------------------------------------------------------------------------------------------------------------------------------------------------------------|------------------------------------------------------------------------------------------------------------------------------------------------------------------------------------------------------------------------|-------------------------------------------------------------------------------------------------------------------------------------------------------------------------------------------------------------------------------------------------------------------------------------------------------------------------------------------------------------------------------------------------------|----------------------------------------------------------------------------------------------------------------------------------------------------------------------------------------------------------------------------------------------------------------------------------------------------------------------------------------------------------------------------------------------------------------------------------------------------------------------------------|-----------|
| <p>Margolis et al. 1988 (275)</p> | <p>Design: Cluster RCS</p> <p>Group allocation: Outcomes in patients at a general medicine clinic that had implemented the study intervention were compared with those among patients attending non-intervention sub-specialty clinics during the study period.</p> <p>Follow-up period: 1 month</p> | <p>Number of patients: 218<br/>Age and gender distributions not reported.</p> <p><u>Group 1</u><br/>Number of patients: 101</p> <p><u>Control group</u><br/>Number of patients: 117</p> <p><u>Eligibility criteria:</u> Patients aged 65 years or older, attending the study clinics between November 15 and December 15, 1986.</p> | <p>Number of sites: 1 VA medical centre</p> <p>Site affiliation: Veterans Affairs</p> <p>Number of practices or physicians: 1 general medicine clinic and an unreported number of sub-specialty clinics*</p> <p>Location: United States (Minnesota)</p> <p>* Patients at the general medicine clinic were compared with those attending the sub-specialty clinics</p> | <p><u>Standing orders policy vs usual care</u></p> <p>Intervention aim: Improve vaccination rates<br/>QI agent: Medical center</p> <p><u>Group 1</u></p> <p>Team change: Clinic nurses identified and immunized eligible patients prior to each physician visit.</p> <p><u>Control group</u></p> <p>Usual care.</p>                                                                                                                                                                                                                                                                                                                                                                 | <p><u>Influenza</u><br/>Proportion of eligible patients receiving vaccination</p> <p>Odds ratio of receiving vaccination between treatment and control groups</p> <p><u>Pneumococcal</u><br/>Not targeted.</p>         | <p><u>Influenza</u><br/>Follow-up*<br/>Group 1: 43/97 (44%)<br/>Control: 18/106 (17%)</p> <p>Follow-up<br/>OR = 3.89<br/>P &lt; 0.001</p> <p><u>Pneumococcal</u><br/>Not targeted.</p> <p>* Number of patients vaccinated at a study site during the study period – 10% to 25% of patients had received influenza vaccinations elsewhere.</p>                                                         | <p>An organization standing orders intervention resulted in substantial improvement in the influenza vaccine ordering rate, and in the proportion of patients vaccinated at the study sites.</p> <p>This study may suffer from vaccination status ascertainment bias. Intervention site nurses may have been more vigilant at inquiring for and recording vaccination status, since more patients in the treatment group were recorded as having received vaccine elsewhere.</p> | <p>17</p> |
| <p>Margolis et al. 1992 (276)</p> | <p>Design: CBA</p> <p>Group allocation: Experimental study with medical clinics chosen by investigators for similarity between treatment and control sites.</p> <p>Follow-up period: 1 year</p>                                                                                                      | <p>Number of patients: 600<br/>Age (mean(sd)): 72 (sd not reported)</p> <p><u>Group 1</u><br/>Number of patients: 300</p> <p><u>Control group</u><br/>Number of patients: 300</p> <p><u>Eligibility criteria:</u><br/>Patients aged &gt;65 years</p>                                                                                | <p>Number of sites: 1 staff model non-profit private HMO</p> <p>Site affiliation: Private managed care organization</p> <p>Number of practices or physicians: 4 primary care clinics*</p> <p>Location: United States (Minnesota)</p> <p>* Clinics were allocated to treatment (2 clinics) and control (2 clinics) groups.</p>                                         | <p><u>Multi-component strategy vs usual care</u></p> <p>Intervention aim: Improve vaccination rates<br/>QI agent: Medical clinics</p> <p><u>Group 1</u></p> <p>Team change: Hospital policy was adjusted to allow nurses to vaccinate without a signed physician's orders.</p> <p>Clinician reminders: Nurses were prompted to vaccinate by stamped reminders on clinic progress notes. Nurses were trained during in-service education sessions.</p> <p>Patient education / reminder: An informational letter was mailed to all eligible patients.</p> <p>Clinician education: In-service education sessions were held to train nurse vaccinators.</p> <p><u>Control group</u></p> | <p><u>Influenza</u><br/>Proportion of eligible patients receiving vaccination (95% CI)</p> <p>Odds ratio of receiving vaccination between treatment and control groups</p> <p><u>Pneumococcal</u><br/>Not targeted</p> | <p><u>Influenza</u><br/>Baseline<br/>Overall*<br/>Group 1: 125/180 (69%)<br/>Control: 124/215 (58%)</p> <p>Follow-up<br/>Overall* **<br/>Group 1: 199/281 (71%)<br/>Control: 157/276 (57%)</p> <p>Follow-up**<br/>Overall<br/>OR = 1.84<br/>P &lt; 0.001</p> <p><u>Pneumococcal</u><br/>Not targeted.</p> <p>* Calculated by present reviewers.<br/>** Heterogeneity present between study sites.</p> | <p>A multi-component vaccination strategy stressing organizational change, and nurse- and patient-oriented education successfully increased vaccination rates.</p> <p>This strategy, originally deployed in an academic Veterans Affairs setting, was successfully generalized to the community setting.</p>                                                                                                                                                                     | <p>19</p> |

Online Supplementary Data

http://www.annfammed.org/content/10/6/538/DC1

|                                 |                                                                                                                                                                                                                                                   |                                                                                                                                                                                                                                                                                                                                                                                                                                                                                                                                            |                                                                                                                                                                                                                                                                                                                                                                                    |                                                                                                                                                                                                                                                                                                                                                                                                                                                                                                                                                                                                                                                                                                                                                                                                                                                                                                                                                                                                                                                                                                                                                                                                                                                                                                                                                                                                                                                     |                                                                                                                                                                                                                |                                                                                                                                                                                                                                                                                                                                                                                                                                                                                                                                                                                                                                                                                    |                                                                                                                                                                                                                                                                              |           |
|---------------------------------|---------------------------------------------------------------------------------------------------------------------------------------------------------------------------------------------------------------------------------------------------|--------------------------------------------------------------------------------------------------------------------------------------------------------------------------------------------------------------------------------------------------------------------------------------------------------------------------------------------------------------------------------------------------------------------------------------------------------------------------------------------------------------------------------------------|------------------------------------------------------------------------------------------------------------------------------------------------------------------------------------------------------------------------------------------------------------------------------------------------------------------------------------------------------------------------------------|-----------------------------------------------------------------------------------------------------------------------------------------------------------------------------------------------------------------------------------------------------------------------------------------------------------------------------------------------------------------------------------------------------------------------------------------------------------------------------------------------------------------------------------------------------------------------------------------------------------------------------------------------------------------------------------------------------------------------------------------------------------------------------------------------------------------------------------------------------------------------------------------------------------------------------------------------------------------------------------------------------------------------------------------------------------------------------------------------------------------------------------------------------------------------------------------------------------------------------------------------------------------------------------------------------------------------------------------------------------------------------------------------------------------------------------------------------|----------------------------------------------------------------------------------------------------------------------------------------------------------------------------------------------------------------|------------------------------------------------------------------------------------------------------------------------------------------------------------------------------------------------------------------------------------------------------------------------------------------------------------------------------------------------------------------------------------------------------------------------------------------------------------------------------------------------------------------------------------------------------------------------------------------------------------------------------------------------------------------------------------|------------------------------------------------------------------------------------------------------------------------------------------------------------------------------------------------------------------------------------------------------------------------------|-----------|
| <p>McCaul et al. 2002 (277)</p> | <p>Design:<br/>Cluster RCT</p> <p>Group allocation:<br/>Experimental study with state counties randomly allocated to treatment and control groups, and patients allocated within select state counties.</p> <p>Follow-up period:<br/>6 months</p> | <p>Number of patients: 23733</p> <p><u>Group 1s 1, 2, 3, and 4</u><br/>Number of patients: 15837<br/>Female/male: 9107/6730<br/>Age (mean(sd)): Not reported</p> <p><u>Control group</u><br/>Number of patients: 7896<br/>Female/male: 4476/3420<br/>Age (mean(sd)): Not reported</p> <p><u>Eligibility criteria:</u><br/>Patients aged 65 years and older, who had not billed Medicare for influenza vaccination the year before. Study investigators excluded patients for whom the intervention mailings were returned undelivered.</p> | <p>Number of sites: 1<br/>Medicare peer review organization for the state of North Dakota</p> <p>Site affiliation: State-wide public payer</p> <p>Number of practices or physicians: 49 state counties*</p> <p>Location: United States (North Dakota)</p> <p>* Counties were randomized to Groups 1, 2, and 3 (17 counties); Group 4 (12 counties); and controls (20 counties)</p> | <p>Usual care.</p> <p><u>Reminder letters vs reminder letters with a gain-framed educational component vs reminder letters with a loss-framed educational component vs action letters vs usual care</u></p> <p>Intervention aim: Improve vaccination rates<br/>QI agent: State Medicare peer review organization</p> <p><u>Group 1 (Reminder only)</u></p> <p>Patient education / reminders: A letter was sent to eligible patients reminding patients that they should receive the flu shot, the flu shot is safe, and that Medicare will pay for the flu shot.</p> <p><u>Group 2 (Reminder + gain-framed education)</u></p> <p>Patient education / reminders: The reminder letter was accompanied by an insert, featuring the picture and testimonial of a woman who had received a flue shot the previous year and not gotten the flu. The insert described the benefits of vaccination.</p> <p><u>Group 3 (Reminder + loss-framed education)</u></p> <p>Patient education / reminders: The reminder letter was accompanied by the picture and testimonial of a woman who had not received a flu shot the previous year and had spent several days in bed, sick with the flu. The insert described the risks of not getting vaccinated.</p> <p><u>Group 4 (Action letters)</u></p> <p>Patient education / reminders: Patients received a letter indicating the times and places during which health units would be holding flu shot clinics.</p> | <p><u>Influenza</u><br/>Proportion of eligible patients receiving vaccination</p> <p>Odds ratio of receiving vaccination between treatment and control groups</p> <p><u>Pneumococcal</u><br/>Not targeted.</p> | <p><u>Influenza</u><br/>Follow-up<br/>Group 1: 798/3258 (25%)<br/>Group 2: 766/3260 (24%)<br/>Group 3: 799/3262 (25%)<br/>Group 4: 1708/657 (28%)<br/>Control: 1548/7896 (20%)</p> <p>Follow-up<br/>Group 1<br/>OR = 1.33, p &lt; 0.001<br/>Group 2<br/>OR = 1.26, p &lt; 0.001<br/>Group 3<br/>OR = 1.33, p &lt; 0.001</p> <p>Reminder mailings (Groups 1, 2, and 3) vs control<br/>OR = 1.31<br/>P &lt; 0.01*</p> <p>Action mailings (Group 4) vs control<br/>OR = 1.61<br/>P &lt; 0.01*</p> <p><u>Pneumococcal</u><br/>Not targeted.</p> <p>* Unit of analysis was accounted for in secondary sensitivity analyses and found not to differ from the results presented here.</p> | <p>Neither the gain-framed message nor the loss-framed message improved vaccination rates compared with the brief reminder.</p> <p>The action-plan approach was very effective, producing significantly higher vaccination rate than the no-treatment control condition.</p> | <p>20</p> |
|---------------------------------|---------------------------------------------------------------------------------------------------------------------------------------------------------------------------------------------------------------------------------------------------|--------------------------------------------------------------------------------------------------------------------------------------------------------------------------------------------------------------------------------------------------------------------------------------------------------------------------------------------------------------------------------------------------------------------------------------------------------------------------------------------------------------------------------------------|------------------------------------------------------------------------------------------------------------------------------------------------------------------------------------------------------------------------------------------------------------------------------------------------------------------------------------------------------------------------------------|-----------------------------------------------------------------------------------------------------------------------------------------------------------------------------------------------------------------------------------------------------------------------------------------------------------------------------------------------------------------------------------------------------------------------------------------------------------------------------------------------------------------------------------------------------------------------------------------------------------------------------------------------------------------------------------------------------------------------------------------------------------------------------------------------------------------------------------------------------------------------------------------------------------------------------------------------------------------------------------------------------------------------------------------------------------------------------------------------------------------------------------------------------------------------------------------------------------------------------------------------------------------------------------------------------------------------------------------------------------------------------------------------------------------------------------------------------|----------------------------------------------------------------------------------------------------------------------------------------------------------------------------------------------------------------|------------------------------------------------------------------------------------------------------------------------------------------------------------------------------------------------------------------------------------------------------------------------------------------------------------------------------------------------------------------------------------------------------------------------------------------------------------------------------------------------------------------------------------------------------------------------------------------------------------------------------------------------------------------------------------|------------------------------------------------------------------------------------------------------------------------------------------------------------------------------------------------------------------------------------------------------------------------------|-----------|

Online Supplementary Data

http://www.annfammed.org/content/10/6/538/DC1

|                                                                                                  |                                                                                                                                                                                         |                                                                                                                                                                                                                                                                                                                                                                                                                                                                                                                                                                                                                   |                                                                                                                                                                                                                                                                                                                                |                                                                                                                                                                                                                                                                                                                                                                                                                   |                                                                                                                                                                                                                                                                                                                                                                                                                                                                                                                                                                                                                                               |                                                                                                                                                                                                                                                                                                                                                                                                                                                                                                                                                                                                                                                                                                                                                                                                                                                      |                                                                                                                                                                                                                                                                                                                                                                                                                                                                                                                                                                                                                                                                                                                                                                                                                                                                           |           |
|--------------------------------------------------------------------------------------------------|-----------------------------------------------------------------------------------------------------------------------------------------------------------------------------------------|-------------------------------------------------------------------------------------------------------------------------------------------------------------------------------------------------------------------------------------------------------------------------------------------------------------------------------------------------------------------------------------------------------------------------------------------------------------------------------------------------------------------------------------------------------------------------------------------------------------------|--------------------------------------------------------------------------------------------------------------------------------------------------------------------------------------------------------------------------------------------------------------------------------------------------------------------------------|-------------------------------------------------------------------------------------------------------------------------------------------------------------------------------------------------------------------------------------------------------------------------------------------------------------------------------------------------------------------------------------------------------------------|-----------------------------------------------------------------------------------------------------------------------------------------------------------------------------------------------------------------------------------------------------------------------------------------------------------------------------------------------------------------------------------------------------------------------------------------------------------------------------------------------------------------------------------------------------------------------------------------------------------------------------------------------|------------------------------------------------------------------------------------------------------------------------------------------------------------------------------------------------------------------------------------------------------------------------------------------------------------------------------------------------------------------------------------------------------------------------------------------------------------------------------------------------------------------------------------------------------------------------------------------------------------------------------------------------------------------------------------------------------------------------------------------------------------------------------------------------------------------------------------------------------|---------------------------------------------------------------------------------------------------------------------------------------------------------------------------------------------------------------------------------------------------------------------------------------------------------------------------------------------------------------------------------------------------------------------------------------------------------------------------------------------------------------------------------------------------------------------------------------------------------------------------------------------------------------------------------------------------------------------------------------------------------------------------------------------------------------------------------------------------------------------------|-----------|
|                                                                                                  |                                                                                                                                                                                         |                                                                                                                                                                                                                                                                                                                                                                                                                                                                                                                                                                                                                   |                                                                                                                                                                                                                                                                                                                                | <p><u>Control group</u></p> <p>Usual care.</p>                                                                                                                                                                                                                                                                                                                                                                    |                                                                                                                                                                                                                                                                                                                                                                                                                                                                                                                                                                                                                                               |                                                                                                                                                                                                                                                                                                                                                                                                                                                                                                                                                                                                                                                                                                                                                                                                                                                      |                                                                                                                                                                                                                                                                                                                                                                                                                                                                                                                                                                                                                                                                                                                                                                                                                                                                           |           |
| <p>McDonald et al. 1984 (278)</p> <p>Supplemented with data from McDonald et al. 1992 (136).</p> | <p>Design:<br/>Cluster RCT</p> <p>Group allocation:<br/>Experimental study with physicians randomly allocated to treatment and control groups.</p> <p>Follow-up period:<br/>3 years</p> | <p>Number of patients: 4555*</p> <p><u>Group 1</u><br/>Number of patients: 2319*</p> <p><u>Control group</u><br/>Number of patients: 2236*</p> <p><u>Eligibility criteria:</u><br/>All patients attending a general medicine clinic. Pneumococcal and influenza vaccinations were indicated for patients aged 65 years or older, chronic lung disease, asthma, diabetes mellitus, congestive heart failure, or severe renal or hepatic failure. Patients were eligible for pneumococcal vaccination if they did not have a previously recorded vaccination.</p> <p>* Reported from McDonald et al. 1992 (136)</p> | <p>Number of sites: 1 general medicine teaching clinic</p> <p>Site affiliation: University</p> <p>Number of practices or physicians: 115 residents, 11 faculty, and 4 nurse-practitioners*</p> <p>Location: United States (Indiana)</p> <p>* Clinician teams were randomly assigned to study groups, numbers not reported.</p> | <p><u>Computer generated reminders vs usual care</u></p> <p>Intervention aim: Improve preventive care<br/>QI agent: General medicine service at a large teaching hospital</p> <p><u>Group 1</u></p> <p>Clinician reminders: Patient specific reminders were generated, by computer, from each patient's EMR and attached to patient charts prior to each visit.</p> <p><u>Control group</u></p> <p>Usual care</p> | <p><u>Influenza</u><br/>Proportion of eligible patients receiving vaccination, taken as a continuous performance score for each provider (mean(sd))*</p> <p>Proportion of eligible patients receiving vaccination, considering only patients who attended the clinic in the Fall, when vaccination had become available **</p> <p>Odds ratio of receiving vaccination between treatment and control groups **</p> <p><u>Pneumococcal</u><br/>Proportion of eligible patients receiving vaccination, taken as a continuous performance score for each provider (mean(sd))*</p> <p>Proportion of eligible patients receiving vaccination **</p> | <p><u>Influenza</u><br/>Follow-up<br/>Group 1: 44%(27%)<br/>Control: 20% (22%)</p> <p>Test of significance<br/>P &lt; 0.0005</p> <p>Follow-up year 1<br/>Group 1: 469/2319 (20%)<br/>Control: 225/2236 (10%)</p> <p>Follow-up year 2<br/>Group 1: 457/2319 (20%)<br/>Control: 267/2236 (12%)</p> <p>Follow-up year 3<br/>Group 1: 388/2319 (17%)<br/>Control: 193/2236 (9%)</p> <p>Follow-up year 1<br/>OR = 2.27, P &lt; 0.0001</p> <p>Follow-up year 2<br/>OR = 1.81, P &lt; 0.0001</p> <p>Follow-up year 3<br/>OR = 2.13, P &lt; 0.0001</p> <p><u>Pneumococcal</u><br/>Follow-up<br/>Group 1: 50% (31%)<br/>Control: 11% (19%)</p> <p>Test of significance<br/>P &lt; 0.0005</p> <p>Follow-up year 1<br/>Group 1: 861/2319 (37%)<br/>Control: 225/2236 (10%)</p> <p>Follow-up year 2<br/>Group 1: 1203/2319 (52%)<br/>Control: 392/2236 (18%)</p> | <p>The usage of preventive care was at least twofold greater among physicians in the study group than among control group physicians.</p> <p>Neither the number of years of training nor a faculty assessment of clinical ability predicted resident response rates. Attitudes about the reminder system and the degree to which residents read reminder reports were correlated, and predictive of preventive care response rates.</p> <p>Computer reminder messages had no overall effect on measures of patient morbidity. However, a follow-up study (McDonald et al. 1992 (136)) showed an association between the study intervention and a reduction in Winter morbidity. After having tested alternative explanations for this association, the authors attributed the improvement to increased influenza vaccination rates among intervention-group patients.</p> | <p>23</p> |

|                                                                                                 |                                                                                                                                                                                          |                                                                                                                                                                                                                                                                                                                                                                                                                                                      |                                                                                                                                                                                                                                                                                                                                 |                                                                                                                                                                                                                                                                                                                                                                                                                                                                                                                                                                                                                                                                                                                                                                                                                                    |                                                                                                                                                                                                                                                                                                                               |                                                                                                                                                                                                                                                                                                                                                                                                                                                                                                                                                                                                                                                             |                                                                                                                                                                                                                                                                                                                                                                                                                                                                                                                                                                                                                                                                                                                                                                                                                                                                                                                                                      |    |
|-------------------------------------------------------------------------------------------------|------------------------------------------------------------------------------------------------------------------------------------------------------------------------------------------|------------------------------------------------------------------------------------------------------------------------------------------------------------------------------------------------------------------------------------------------------------------------------------------------------------------------------------------------------------------------------------------------------------------------------------------------------|---------------------------------------------------------------------------------------------------------------------------------------------------------------------------------------------------------------------------------------------------------------------------------------------------------------------------------|------------------------------------------------------------------------------------------------------------------------------------------------------------------------------------------------------------------------------------------------------------------------------------------------------------------------------------------------------------------------------------------------------------------------------------------------------------------------------------------------------------------------------------------------------------------------------------------------------------------------------------------------------------------------------------------------------------------------------------------------------------------------------------------------------------------------------------|-------------------------------------------------------------------------------------------------------------------------------------------------------------------------------------------------------------------------------------------------------------------------------------------------------------------------------|-------------------------------------------------------------------------------------------------------------------------------------------------------------------------------------------------------------------------------------------------------------------------------------------------------------------------------------------------------------------------------------------------------------------------------------------------------------------------------------------------------------------------------------------------------------------------------------------------------------------------------------------------------------|------------------------------------------------------------------------------------------------------------------------------------------------------------------------------------------------------------------------------------------------------------------------------------------------------------------------------------------------------------------------------------------------------------------------------------------------------------------------------------------------------------------------------------------------------------------------------------------------------------------------------------------------------------------------------------------------------------------------------------------------------------------------------------------------------------------------------------------------------------------------------------------------------------------------------------------------------|----|
|                                                                                                 |                                                                                                                                                                                          |                                                                                                                                                                                                                                                                                                                                                                                                                                                      |                                                                                                                                                                                                                                                                                                                                 |                                                                                                                                                                                                                                                                                                                                                                                                                                                                                                                                                                                                                                                                                                                                                                                                                                    |                                                                                                                                                                                                                                                                                                                               | <p>Follow-up year 3<br/>1373/2319 (59%)<br/>Control: 496/2236 (22%)</p> <p>Follow-up year 1<br/>OR = 5.28, P &lt; 0.0001</p> <p>Follow-up year 2<br/>OR = 5.07, P &lt; 0.0001</p> <p>Follow-up year 3<br/>OR = 5.09, P &lt; 0.0001</p>                                                                                                                                                                                                                                                                                                                                                                                                                      |                                                                                                                                                                                                                                                                                                                                                                                                                                                                                                                                                                                                                                                                                                                                                                                                                                                                                                                                                      |    |
| <p>McDowell et al. 1986 (279)</p> <p>Supplemented with data from McDowell et al. 1990 (138)</p> | <p>Design:<br/>CCT</p> <p>Group allocation:<br/>Experimental study with patients' families randomly allocated to treatment and control groups.</p> <p>Follow-up period:<br/>3 months</p> | <p>Number of patients: 1420<br/>Age and gender distributions not reported for each study group</p> <p><u>Group 1</u><br/>Number of patients: 265</p> <p><u>Group 2</u><br/>Number of patients: 226</p> <p><u>Group 3</u><br/>Number of patients: 218</p> <p><u>Control group</u><br/>Number of patients: 230</p> <p><u>Non-participants</u><br/>Number of patients: 481</p> <p><u>Eligibility criteria:</u><br/>Patients aged 65 years or older.</p> | <p>Number of sites: 1<br/>academic family medicine centre</p> <p>Site affiliation: University</p> <p>Number of practices or physicians: 6 practices*</p> <p>Location: Canada (Ontario)</p> <p>* 4 of 6 practices participated in this study. The two non-participant practices contributed "non-contaminated" outcome data.</p> | <p>Patient reminder letters vs patient reminder telephone calls from a nurse vs clinician reminder prompts vs usual care</p> <p>Intervention aim: Improve vaccination rates<br/>QI agent: Medical practices</p> <p><u>Group 1</u></p> <p>Patient education / reminders: Patients were sent a single letter encouraging them to receiving the vaccine. The letter was computer generated and customized from the EMR, and signed by the patient's physician and the practice nurse.</p> <p><u>Group 2</u></p> <p>Patient education / reminders: Patients were called by the practice nurse and informed that they should obtain an influenza vaccination.</p> <p><u>Group 3</u></p> <p>Clinician reminders: Computer generated reminders were generated and attached to each patient's visit chart.</p> <p><u>Control group</u></p> | <p><u>Influenza</u><br/>Proportion of eligible patients receiving vaccination</p> <p>Odds ratio of receiving vaccination between treatment and control groups</p> <p><u>Influenza – Post-intervention (Reminders had ceased)</u><br/>Proportion of eligible patients receiving vaccination</p> <p>Odds ratio of receiving</p> | <p><u>Influenza</u><br/>Follow-up – Intervention year<br/>Group 1: 84/265 (35%)<br/>Group 2: 77/226 (37%)<br/>Group 3: 46/218 (23%)<br/>Control: 21/230 (10%)<br/>Non-participants: 17/481 (4%)</p> <p>Follow-up – Intervention year<br/>OR compared to controls<br/>Group 1: 4.62, p &lt; 0.001<br/>Group 2: 5.14, p &lt; 0.001<br/>Group 3: 2.66, p = 0.001</p> <p>Test of significance for control vs non-participant patients<br/>P &lt; 0.005</p> <p><u>Influenza – Post-intervention (Reminders had ceased)</u><br/>Follow-up – Post-intervention year*<br/>Experimental groups: 116/622 (19%)<br/>Control groups: 100/564 (18%)</p> <p>OR = 1.09</p> | <p>All three approaches to reminding patients were effective in significantly improving the rates achieved without a reminder.</p> <p>Personal reminders by the physician and telephone reminders by the nurse were more effective than reminders by letter.</p> <p>Despite the reminders, influenza vaccination rates remained low.</p> <p>Telephone and physician reminders were more cost-effective than mailings at lower physician and nursing salaries.</p> <p>In a follow-up study, McDowell et al. (138) analyzed patterns of immunization uptake among individual patients over the pre-intervention year, the intervention year, and an additional post-intervention year. They found that the intervention effect was short-lived, and also detected a decrease in immunization rates among patients who had been previously immunized. McDowell et al. suggest that this may be evidence of an adverse dependence on technology, and</p> | 22 |

Online Supplementary Data

http://www.annfammed.org/content/10/6/538/DC1

|                         |                                                                                                                                                               |                                                                                                                                                                                                                                                                                                                                                                                                                            |                                                                                                                                                                               |                                                                                                                                                                                                                                                                                                                                                                                                                                                                                                                                                                                                            |                                                                                                                                                                                                                                                    |                                                                                                                                                                                                                                                                                                                                                                                 |                                                                                                                                                                                                                                                                                                                                                                                                                                                                                                                           |    |
|-------------------------|---------------------------------------------------------------------------------------------------------------------------------------------------------------|----------------------------------------------------------------------------------------------------------------------------------------------------------------------------------------------------------------------------------------------------------------------------------------------------------------------------------------------------------------------------------------------------------------------------|-------------------------------------------------------------------------------------------------------------------------------------------------------------------------------|------------------------------------------------------------------------------------------------------------------------------------------------------------------------------------------------------------------------------------------------------------------------------------------------------------------------------------------------------------------------------------------------------------------------------------------------------------------------------------------------------------------------------------------------------------------------------------------------------------|----------------------------------------------------------------------------------------------------------------------------------------------------------------------------------------------------------------------------------------------------|---------------------------------------------------------------------------------------------------------------------------------------------------------------------------------------------------------------------------------------------------------------------------------------------------------------------------------------------------------------------------------|---------------------------------------------------------------------------------------------------------------------------------------------------------------------------------------------------------------------------------------------------------------------------------------------------------------------------------------------------------------------------------------------------------------------------------------------------------------------------------------------------------------------------|----|
|                         |                                                                                                                                                               |                                                                                                                                                                                                                                                                                                                                                                                                                            |                                                                                                                                                                               | Usual care.<br><u>Non-participant characteristics:</u><br>Usual care.                                                                                                                                                                                                                                                                                                                                                                                                                                                                                                                                      | vaccination between treatment and control groups<br><u>Pneumococcal</u><br>Not targeted.                                                                                                                                                           | P = 0.60<br><u>Pneumococcal</u><br>Not targeted.<br><br>* See next column, at right.                                                                                                                                                                                                                                                                                            | that use of clinician reminders must be careful to educate and support self-management.<br><br>* From previous column: Results from the follow-up study reported in McDowell et al. 1990 (138). This study included patients remaining after an addition year of data collection and analysis, when the intervention had been ceased.                                                                                                                                                                                     |    |
| Moran et al. 1992 (280) | Design: CCT<br><br>Group allocation: Experimental study with random allocation of patients to treatment and control groups.<br><br>Follow-up period: 3 months | Number of patients: 409<br>Female/male: not reported<br><br><u>Group 1</u><br>Number of patients: 135<br>Age (>65): 66 (49%)<br><br><u>Group 2</u><br>Number of patients: 138<br>Age (>65): 68 (49%)<br><br><u>Control group</u><br>Number of patients: 136<br>Age (>65): 68 (50%)<br><br><u>Eligibility criteria:</u><br>Patients aged >65 years or those with a diagnosis of chronic disease recorded in the clinic EMR. | Number of sites: 1 urban health center<br><br>Site affiliation: Unclear<br><br>Number of practices or physicians: Not reported<br><br>Location: United States (State unclear) | <u>Single patient reminder letter vs two sequential patient reminder letters vs usual care</u><br><br>Intervention aim: Improve vaccination rates<br>QI agent: Health clinic<br><br><u>Group 1</u><br><br>Patient education / reminders: Patients were mailed a single letter saying that immunization was medically indicated, did not cause influenza, could result in minor side effects, and was free and available without an appointment.<br><br><u>Group 2</u><br><br>As above, except patients were mailed a second identical letter 1 month later.<br><br><u>Control group</u><br><br>Usual care. | <u>Influenza</u><br>Proportion of eligible patients receiving vaccination at follow-up<br><br>Odds ratio of receiving vaccination between treatment and control groups<br><br><br><br><br><br><br><br><br><br><u>Pneumococcal</u><br>Not targeted. | <u>Influenza</u><br>Follow-up<br>Group 1: 54/135 (40%)<br>Group 2: 41/138 (30%)<br>Control: 52/136 (38%)<br><br>Follow-up<br>Group 1 vs Control<br>OR = 1.08<br>P = 0.80<br><br>Group 2 vs Control<br>OR = 0.68<br>P = 0.33<br><br>Group 1 vs Group 2<br>OR = 1.58<br>P = 0.23<br><br>Overall test of significance<br>P > 0.10 (NS)<br><br><u>Pneumococcal</u><br>Not targeted. | The majority of high-risk patients identified by the electronic patient registry failed to seek influenza in response to reminder letters, even when immunization was free.<br><br>Immunizations proportions in the intervention groups were not significantly different from the control group.<br><br>There is no evidence of a “dose response” to two sequential reminders.<br><br>Patients with appointments were more likely to receive immunization than patients seen on a walk-in basis or during “health fairs”. | 20 |
| Moran et al. 1996 (281) | Design: CCT<br><br>Group allocation: Experimental study, with patients randomly allocated to treatment and control groups.                                    | Number of patients: 797<br><br><u>Group 1</u><br>Number of patients: 198<br>Female/male: 128/70<br>Age (mean(sd)): 65 (15.9)<br><br><u>Group 2</u><br>Number of patients: 198                                                                                                                                                                                                                                              | Number of sites: 1 adult medicine service at an urban community health center<br><br>Site affiliation: Private community delivery system, university/teaching                 | <u>Mailed education brochure vs lottery-type patient incentive vs mailed education brochure and lottery-type patient incentive vs usual care</u><br><br>Intervention aim: Improve vaccination rates<br>QI agent: Medical clinic                                                                                                                                                                                                                                                                                                                                                                            | <u>Influenza</u><br>Proportion of eligible patients receiving vaccination<br><br>Odds ratio of receiving vaccination between treatment                                                                                                             | <u>Influenza</u><br>Baseline*<br>Group 1: 25/79 (32%)<br>Group 2: 38/82 (46%)<br>Group 3: 27/70 (39%)<br>Control: 37/97 (38%)<br><br>Follow-up<br>All patients                                                                                                                                                                                                                  | The odds of immunization for patients in the group mailed the educational brochure were almost twice as great as those of control patients, while the odds of immunization for those mailed the lottery incentive were approximately one and one half times as great.                                                                                                                                                                                                                                                     | 23 |

Online Supplementary Data

http://www.annfammed.org/content/10/6/538/DC1

|                             |                                                                                                                                                |                                                                                                                                                                                                                                                                                                                                                                                                                                                                                                                                                        |                                                                                                                                                                                                                                                                                  |                                                                                                                                                                                                                                                                                                                                                                                                                                                                                                                                                                                                                                                                                                  |                                                                                                                                                                   |                                                                                                                                                                                                                                                                                                                                                                                                                                                                                                                                                                                                                                                                         |                                                                                                                                                                                                                                                                                                                                                                                                                                                                                                                                                                                                                                                                                                                 |    |
|-----------------------------|------------------------------------------------------------------------------------------------------------------------------------------------|--------------------------------------------------------------------------------------------------------------------------------------------------------------------------------------------------------------------------------------------------------------------------------------------------------------------------------------------------------------------------------------------------------------------------------------------------------------------------------------------------------------------------------------------------------|----------------------------------------------------------------------------------------------------------------------------------------------------------------------------------------------------------------------------------------------------------------------------------|--------------------------------------------------------------------------------------------------------------------------------------------------------------------------------------------------------------------------------------------------------------------------------------------------------------------------------------------------------------------------------------------------------------------------------------------------------------------------------------------------------------------------------------------------------------------------------------------------------------------------------------------------------------------------------------------------|-------------------------------------------------------------------------------------------------------------------------------------------------------------------|-------------------------------------------------------------------------------------------------------------------------------------------------------------------------------------------------------------------------------------------------------------------------------------------------------------------------------------------------------------------------------------------------------------------------------------------------------------------------------------------------------------------------------------------------------------------------------------------------------------------------------------------------------------------------|-----------------------------------------------------------------------------------------------------------------------------------------------------------------------------------------------------------------------------------------------------------------------------------------------------------------------------------------------------------------------------------------------------------------------------------------------------------------------------------------------------------------------------------------------------------------------------------------------------------------------------------------------------------------------------------------------------------------|----|
|                             | <p>Follow-up period: 3 months</p>                                                                                                              | <p>Female/male: 129/69<br/>Age (mean(sd)): 65 (17.2)</p> <p><u>Group 3</u><br/>Number of patients: 199<br/>Female/male: 133/66<br/>Age (mean(sd)): 68 (15.2)</p> <p><u>Control group</u><br/>Number of patients: 202<br/>Female/male: 134/68<br/>Age (mean(sd)): 66 (16.6)</p> <p><u>Eligibility criteria:</u><br/>Ambulatory patients, aged 65 years or older, or patients with chronic diseases; seen within the preceding 5 months.<br/>Pneumococcal vaccination outcomes measure among all patients regardless of previous vaccination status.</p> | <p>Number of practices or physicians: 9 physicians</p> <p>Location: United States (Massachusetts)</p>                                                                                                                                                                            | <p><u>Group 1</u><br/>Patient education / reminders:<br/>Educational brochures were mailed to patients. Brochure content emphasized the seriousness of influenza, provided information about important decision factors, and contained information about where and when the vaccination could be obtained.</p> <p><u>Group 2</u><br/>Financial incentive – patients: A lottery notice was sent to patients, informing them that patients receiving immunization would be eligible to win one of three grocery store gift certificates.</p> <p><u>Group 3</u><br/>Patient education / reminders <i>and</i> patient financial incentives, as above.</p> <p><u>Control group</u><br/>Usual care</p> | <p>and control groups</p> <p><u>Pneumococcal</u><br/>Not targeted.</p>                                                                                            | <p>Group 1: 71/198 (36%)<br/>Group 2: 57/198 (29%)<br/>Group 3: 52/199 (26%)<br/>Control: 41/202 (20%)</p> <p>Diabetic patients<br/>Group 1: 11/28 (39%)<br/>Group 2: 11/24 (45%)<br/>Group 3: 5/17 (29%)<br/>Control: 9/25 (36%)</p> <p>Follow-up<br/>All patients**<br/>Group 1<br/>OR = 2.29, P = 0.0004<br/>Group 2<br/>OR = 1.68, P = 0.0308<br/>Group 3<br/>OR = 1.41, P = 0.1527</p> <p>Patients with known previous vaccination history***<br/>Group 1<br/>OR = 3.95, P &lt; 0.001<br/>Group 2<br/>OR = 1.59, P = 0.2113<br/>Group 3<br/>OR = 1.56, P = 0.2460</p> <p><u>Pneumococcal</u><br/>Not targeted.</p> <p>* , * , *** - See next column for notes.</p> | <p>Surprisingly, patients in the group mailed both interventions were less likely to be immunized than those in the single intervention groups. Additionally, patients expressed reservations and suspicion about the incentive. An adverse interaction between incentive and education based interventions may be at play.</p> <p>The marginal cost effectiveness of the educational brochure was less than \$4 per additional immunization over those in the control group.</p> <p>* Previous vaccination history available only for a smaller subset of patients.<br/>** Adjusted for age, pulmonary disease, and diabetes.<br/>*** Adjusted for previous vaccination history and history of alcoholism.</p> |    |
| Morrissey et al. 1995 (282) | <p>Design: RCT</p> <p>Group allocation: Patients were randomly allocated to treatment and control groups.</p> <p>Follow-up period: 2 years</p> | <p>Number of patients: 1914</p> <p><u>Group 1</u><br/>Number of patients: 954<br/>Female/male: 589/365<br/>Age (&gt;= 75): 379</p> <p><u>Control group</u><br/>Number of patients: 960<br/>Female/male: 581/379<br/>Age (&gt;= 75): 383</p> <p>Eligibility criteria: Active</p>                                                                                                                                                                                                                                                                        | <p>Number of sites: 10 primary care practices, 3 of which were audited for vaccination outcomes.*</p> <p>Site affiliation: University, private community delivery system, private practices</p> <p>Number of practices or physicians: 19 physicians practiced at the 3 audit</p> | <p><u>Financial and office systems intervention vs usual care</u></p> <p>Intervention aim: Improve preventive care<br/>QI agent: Medicare / HCFA</p> <p><u>Group 1</u><br/>Financial incentive – clinicians: Physicians received an annual capitated payment from HCFA of \$53 for a preventive care visit, and \$47 for a</p>                                                                                                                                                                                                                                                                                                                                                                   | <p><u>Influenza</u><br/>Proportion of eligible patients receiving vaccination</p> <p>Odds ratio of receiving vaccination between treatment and control groups</p> | <p><u>Influenza</u><br/>Baseline<br/>Group 1: 48%<br/>Control: 45%</p> <p>Follow-up<br/>Group 1: 72%<br/>Control: 52%</p> <p>Follow-up<br/>OR = 2.37<br/>P &lt; 0.001</p>                                                                                                                                                                                                                                                                                                                                                                                                                                                                                               | <p>A financial and office system intervention improved the proportion of patients receiving preventive care.</p>                                                                                                                                                                                                                                                                                                                                                                                                                                                                                                                                                                                                | 23 |



Online Supplementary Data

http://www.annfammed.org/content/10/6/538/DC1

|                              |                                                                                                                                                                   |                                                                                                                                                                                                                                                                                                                                                                                                                                          |                                                                                                                                                                                                          |                                                                                                                                                                                                                                                                                                                                                                                                                                                                                                                                                                                                                                                                                                                              |                                                                                                                                                                                                                                                                                        |                                                                                                                                                                                                                                                             |                                                                                                                                             |    |
|------------------------------|-------------------------------------------------------------------------------------------------------------------------------------------------------------------|------------------------------------------------------------------------------------------------------------------------------------------------------------------------------------------------------------------------------------------------------------------------------------------------------------------------------------------------------------------------------------------------------------------------------------------|----------------------------------------------------------------------------------------------------------------------------------------------------------------------------------------------------------|------------------------------------------------------------------------------------------------------------------------------------------------------------------------------------------------------------------------------------------------------------------------------------------------------------------------------------------------------------------------------------------------------------------------------------------------------------------------------------------------------------------------------------------------------------------------------------------------------------------------------------------------------------------------------------------------------------------------------|----------------------------------------------------------------------------------------------------------------------------------------------------------------------------------------------------------------------------------------------------------------------------------------|-------------------------------------------------------------------------------------------------------------------------------------------------------------------------------------------------------------------------------------------------------------|---------------------------------------------------------------------------------------------------------------------------------------------|----|
|                              |                                                                                                                                                                   | patients at a study site (i.e.: received medical service in the previous 2 years), aged 65 years or older. Patients were enrolled in Medicare Part A and Part B coverage, were community living, and were not enrolled in an HMO.                                                                                                                                                                                                        | <p>sites</p> <p>Location: United States (North Carolina)</p> <p>* Sites included academic and community practices staffed by general internists and family physicians.</p>                               | <p>health promotion counseling visit. The preventive care package included influenza vaccination, FOBT, and depression screening, among other services. The health promotion package featured nurse counseling in a variety of health and wellness areas.</p> <p>Financial incentive – patients: Services under the capitated packages were provided free of charge to patients.</p> <p>Clinician reminders: Practices were prompted monthly by the research team to schedule special prevention appointments for patients who were “due” for preventive services.</p> <p>Team change: Nurses carried out most of the preventive care procedures, including vaccinations.</p> <p><u>Control group</u></p> <p>Usual care.</p> | <p><u>Pneumococcal</u></p> <p>Proportion of eligible patients receiving vaccination</p><br><p>Odds ratio of receiving vaccination between treatment and control groups</p>                                                                                                             | <p><u>Pneumococcal</u></p> <p>Baseline</p> <p>Group 1: 33%<br/>Control: 29%</p> <p>Follow-up*</p> <p>Group 1: 80%<br/>Control: 35%</p> <p>Follow-up *</p> <p>OR = 7.43<br/>P &lt; 0.001</p> <p>* This value may include previously vaccinated patients.</p> |                                                                                                                                             |    |
| Mullooly et al. (1987) (283) | <p>Design: CCT</p> <p>Group allocation: Experimental study with patient randomly allocated to treatment and control groups.</p> <p>Follow-up period: 8 months</p> | <p>Number of patients: 2217</p> <p><u>Group 1</u></p> <p>Number of patients: 1105<br/>Female/male: 531/574<br/>Age (mean(sd)): Not reported</p> <p><u>Control group</u></p> <p>Number of patients: 1112<br/>Female/male: 586/526<br/>Age (mean(sd)): Not reported</p> <p><u>Eligibility criteria:</u></p> <p>Patients aged 65 or older, discharged from hospital with chronic disease.</p> <p><u>Exclusion:</u></p> <p>None reported</p> | <p>Number of sites: 1 large HMO</p> <p>Site affiliation: Private MCO</p> <p>Number of practices or physicians: Not reported</p> <p>Location: United States (numerous states in the Northwest region)</p> | <p><u>Mailed patient reminder letters vs usual care</u></p> <p>Intervention aim: Improve vaccination rates<br/>QI agent: Private MCO</p> <p><u>Group 1</u></p> <p>Patient education / reminders: Patients received a personalized letter stressing the importance of influenza vaccination for high-risk elderly individuals who had been hospitalized during the past year.</p> <p><u>Control group</u></p> <p>Usual care</p>                                                                                                                                                                                                                                                                                               | <p><u>Influenza</u></p> <p>Proportion of eligible patients receiving vaccination</p><br><p>Risk difference between treatment and control groups</p><br><p>Odds ratio of receiving vaccination between treatment and control groups</p> <p><u>Pneumococcal</u></p> <p>Not targeted.</p> | <p><u>Influenza</u></p> <p>Follow-up</p> <p>Group 1: 430/1105 (39%)<br/>Control: 335/1112 (30%)</p> <p>Follow-up</p> <p>Diff: 8.9%<br/>95% CI = [4.9, 12.7]</p> <p>Follow-up</p> <p>OR = 1.48</p> <p><u>Pneumococcal</u></p> <p>Not targeted.</p>           | A single mailed cue increased the vaccination among high-risk elderly by 28 percent. However, the majority of patients were not vaccinated. | 21 |
| Nexoe et al. 1997 (284)      | <p>Design: CCT</p> <p>Group allocation:</p>                                                                                                                       | <p>Number of patients: 585<br/>Age and gender distribution not reported</p>                                                                                                                                                                                                                                                                                                                                                              | <p>Number of sites: 13 general practices</p> <p>Site affiliation: Private</p>                                                                                                                            | <p><u>Mailed patient reminder cards and free vaccination vs mailed patient reminder cards and patient-pay vaccinations vs usual care</u></p>                                                                                                                                                                                                                                                                                                                                                                                                                                                                                                                                                                                 | <p><u>Influenza</u></p> <p>Proportion of eligible patients receiving vaccination</p>                                                                                                                                                                                                   | <p><u>Influenza</u></p> <p>Follow-up</p> <p>Group 1: 140/195 (72%)<br/>Group 2: 95/195 (49%)</p>                                                                                                                                                            | “Spontaneous” influenza vaccination rates were low in the studied high-risk population. Postal invitations improved the                     | 21 |

Online Supplementary Data

http://www.annfammed.org/content/10/6/538/DC1

|                                 |                                                                                                                                                                                                                   |                                                                                                                                                                                                                                                                                                                                                                                                                                                                                                                              |                                                                                                                                                                                                                                                                                                                              |                                                                                                                                                                                                                                                                                                                                                                                                                                                                                                                                                                                                                                                                                                          |                                                                                                                                                |                                                                                                                                                                                                                                                                                                                                                                                                                                |                                                                                                                                                                                                                                                                                                                                                                                                                                                                                                                                                                             |           |
|---------------------------------|-------------------------------------------------------------------------------------------------------------------------------------------------------------------------------------------------------------------|------------------------------------------------------------------------------------------------------------------------------------------------------------------------------------------------------------------------------------------------------------------------------------------------------------------------------------------------------------------------------------------------------------------------------------------------------------------------------------------------------------------------------|------------------------------------------------------------------------------------------------------------------------------------------------------------------------------------------------------------------------------------------------------------------------------------------------------------------------------|----------------------------------------------------------------------------------------------------------------------------------------------------------------------------------------------------------------------------------------------------------------------------------------------------------------------------------------------------------------------------------------------------------------------------------------------------------------------------------------------------------------------------------------------------------------------------------------------------------------------------------------------------------------------------------------------------------|------------------------------------------------------------------------------------------------------------------------------------------------|--------------------------------------------------------------------------------------------------------------------------------------------------------------------------------------------------------------------------------------------------------------------------------------------------------------------------------------------------------------------------------------------------------------------------------|-----------------------------------------------------------------------------------------------------------------------------------------------------------------------------------------------------------------------------------------------------------------------------------------------------------------------------------------------------------------------------------------------------------------------------------------------------------------------------------------------------------------------------------------------------------------------------|-----------|
|                                 | <p>Experimental study with patients randomly allocated to treatment and control groups.</p> <p>Follow-up period: Approximately 3.5 months</p>                                                                     | <p><u>Group 1</u><br/>Number of patients: 195</p> <p><u>Group 1</u><br/>Number of patients: 195</p> <p><u>Control group</u><br/>Number of patients: 195</p> <p><u>Eligibility criteria:</u><br/>Patients aged 65 years or older, or patients with a chronic disease.<br/>Patient group may have included nursing home residents, number not reported.</p>                                                                                                                                                                    | <p>practices</p> <p>Number of practices or physicians: As above.</p> <p>Location: Denmark</p>                                                                                                                                                                                                                                | <p>Intervention aim: Improve vaccination rates<br/>QI agent: Medical practices</p> <p><u>Group 1</u></p> <p>Patient education / reminders: Mailed reminders were sent to patients inviting them to receiving influenza vaccination. Reminders were personalized with the patient's name and the GP's signature.</p> <p>Patient financial incentive: Influenza vaccination provided for free.</p> <p><u>Group 2</u></p> <p>Patient education / reminders as above, except <i>without</i> patient financial incentive – patients paid the usual GP vaccination fee of US \$40-60.</p> <p><u>Control group</u></p> <p>Usual care – no patient reminders. Patients paid US \$40-60 for each vaccination.</p> | <p>Odds ratio of receiving vaccination between treatment and control groups</p> <p><u>Pneumococcal</u><br/>Not targeted.</p>                   | <p>Control: 48/195 (25%)</p> <p>Follow-up<br/>Group 1<br/>OR = 7.80<br/>P &lt; 0.001</p> <p>Group 2<br/>OR = 2.91<br/>P &lt; 0.001</p> <p><u>Pneumococcal</u><br/>Not targeted.</p>                                                                                                                                                                                                                                            | <p>rates, and full reimbursement improved the rates further.</p>                                                                                                                                                                                                                                                                                                                                                                                                                                                                                                            |           |
| <p>Nichol et al. 1990 (285)</p> | <p>Design: Cluster PCS</p> <p>Group allocation: A Veterans Affairs Medical Center (VAMC) implementing the intervention was compared to similar VAMCs during the study period.</p> <p>Follow-up period: 1 year</p> | <p>Number of patients: 1375 (Number of patients responding to the outcome survey out of 1893 sampled. Survey responders enumerated below.)</p> <p><u>Group 1</u><br/>Number of patients: 378<br/>Age (mean(sd)): 60.2 (27.2)</p> <p><u>Control group</u><br/>Number of patients: 997<br/>Age (mean(sd)): Mean age ranged from 56.4 to 59.1 at the 3 comparison sites.</p> <p><u>Eligibility criteria:</u> Patients on the study site outpatient rosters. All patients, regardless of high-risk status, were targeted for</p> | <p>Number of sites: 4 VA medical centers*</p> <p>Site affiliation: University, Veterans Affairs</p> <p>Number of practices or physicians: Not reported.</p> <p>Location: United States (Midwestern region)</p> <p>* 1 VAMC comprised the intervention site. The other 3 VAMCs comprised the concurrent comparison sites.</p> | <p><u>Multifactorial intervention with nurse-led vaccination clinics vs usual care</u></p> <p>Intervention aim: Improve vaccination rates<br/>QI agent: Medical center</p> <p><u>Group 1</u></p> <p>Team change: Nurses gave influenza vaccinations to outpatients without a signed physician's order. Nurses were asked to offer vaccination to <i>all</i> patients regardless of risk status. In addition to staffing a vaccination station during regular clinic hours, nurses held a 2-week walk-in vaccination clinic.</p> <p>Clinician reminders: Nurses were reminded to offer patients influenza</p>                                                                                             | <p><u>Influenza</u><br/>Proportion of eligible patients receiving vaccination</p> <p>Odds ratio of receiving vaccination between treatment</p> | <p><u>Influenza</u><br/>Follow-up ...<br/>... among patients aged 65 years or older<br/>Group 1: 108/176 (61%)<br/>Control: 132/377 (35%)</p> <p>... Among patients with diabetes<br/>Group 1: 28/45 (62%)<br/>Control: 41/129 (31%)</p> <p>... Among any patient with a "high risk" indication for vaccination<br/>Group 1: 28/45 (62.2%)<br/>Control: 41/129 (31.8%)</p> <p>Follow-up ...<br/>... Among patients aged 65</p> | <p>A multifactorial intervention centered around expanded roles for clinic nurses in promoting vaccinations improved vaccination rates compared to comparison clinics that had implemented little or no programs to improve vaccinations. Study investigators decided not to direct interventions toward physicians due to perceived ceiling effects related to physician receptivity.</p> <p>A large proportion of vaccinated patients received their vaccinations at an outside community site (36% in the intervention group vs 46% in the control sites, p = 0.05).</p> | <p>17</p> |

Online Supplementary Data

http://www.annfammed.org/content/10/6/538/DC1

|                          |                                                                                                                                                                                                                    |                                                                                                                                                                                                                                                                                                                                                                                                                                                                                                                                                                                                                                                                                     |                                                                                                                                                                                                                                                                                                                                                    |                                                                                                                                                                                                                                                                                                                                                                                                                                                                                                                                                                                                                                                                                                                                                                                                       |                                                                                                                                                                          |                                                                                                                                                                                                                                                                                                                                                                                                                                                                                                |                                                                                                                                                                                                                                                |    |
|--------------------------|--------------------------------------------------------------------------------------------------------------------------------------------------------------------------------------------------------------------|-------------------------------------------------------------------------------------------------------------------------------------------------------------------------------------------------------------------------------------------------------------------------------------------------------------------------------------------------------------------------------------------------------------------------------------------------------------------------------------------------------------------------------------------------------------------------------------------------------------------------------------------------------------------------------------|----------------------------------------------------------------------------------------------------------------------------------------------------------------------------------------------------------------------------------------------------------------------------------------------------------------------------------------------------|-------------------------------------------------------------------------------------------------------------------------------------------------------------------------------------------------------------------------------------------------------------------------------------------------------------------------------------------------------------------------------------------------------------------------------------------------------------------------------------------------------------------------------------------------------------------------------------------------------------------------------------------------------------------------------------------------------------------------------------------------------------------------------------------------------|--------------------------------------------------------------------------------------------------------------------------------------------------------------------------|------------------------------------------------------------------------------------------------------------------------------------------------------------------------------------------------------------------------------------------------------------------------------------------------------------------------------------------------------------------------------------------------------------------------------------------------------------------------------------------------|------------------------------------------------------------------------------------------------------------------------------------------------------------------------------------------------------------------------------------------------|----|
|                          |                                                                                                                                                                                                                    | vaccination at the intervention site. Analyses were stratified by vaccination indication.                                                                                                                                                                                                                                                                                                                                                                                                                                                                                                                                                                                           |                                                                                                                                                                                                                                                                                                                                                    | <p>vaccination by stamps placed on progress notes by clinic clerks.</p> <p>Patient education / reminders: All outpatients received a letter encouraging them to receive influenza vaccination if they fell into a high risk category. The letter advertised the dates, hours, and locations of the nurse-led walk-in vaccination clinic.</p> <p><u>Control group</u></p> <p>Usual care, with publicity provided through clinic posters and waiting room materials. At one control site, a brief reminder was mailed to select high-risk outpatients, and an influenza vaccination clinic was held for patients with appointments several hours each day.</p>                                                                                                                                          | and control groups                                                                                                                                                       | <p>years or older<br/>OR = 2.95*<br/>P &lt; 0.005</p> <p>... Among patients with diabetes<br/>OR = 3.55*<br/>P &lt; 0.005</p> <p>... Among any patient with a “high risk” indication for vaccination<br/>ORs ranged from 3.05 to 3.52 depending on the comparison site.<br/>Comparisons were reported as statistically significant, with p &lt; 0.00001.</p> <p><u>Pneumococcal</u><br/>Not targeted.</p>                                                                                      |                                                                                                                                                                                                                                                |    |
| Nowalk et al. 2010 (286) | <p>Design:<br/>Cluster-RCT</p> <p>Group allocation:<br/>Experimental study with employers randomly allocated to treatment and control groups</p> <p>Follow-up period:<br/>Unclear<br/>(approximately 4 months)</p> | <p>Number of patients: 12222</p> <p><u>Group 1</u><br/>Number of patients: 3757<br/>Female/male: 39.2% (18.6%)*<br/>Age (proportion of employees aged 18-49): 72.7% (12.2%)*</p> <p><u>Group 2</u><br/>Number of patients: 4387<br/>Female/male: 49.8% (17.6%)*<br/>Age (proportion of employees aged 18-49): 75.1% (12.4%)*</p> <p><u>Control group</u><br/>Number of patients: 4078<br/>Female/male: 39.4% (18.1%)*<br/>Age (proportion of employees aged 18-49): 75.1% (11.0%)*</p> <p><u>Eligibility criteria:</u><br/>Employer sites were those having previously hosted a vaccination clinic, delivered by a single third-party health care services consultant, in which</p> | <p>Number of sites: 54 employers *</p> <p>Site affiliation: Employers in non-health related sectors, with a previous relationship to a particular health care services contract organization</p> <p>Number of practices or physicians: Not reported.</p> <p>Location: United States (Various states)</p> <p>* 18 employer sites in each group.</p> | <p><u>Workplace vaccination clinics with “Choice” sites offering intra-nasal live-attenuated vaccine (LAV) vs “Choice-plus” sites offering LAV with increased employee outreach and \$5 financial incentives vs usual care with trivalent vaccine (TIV)</u></p> <p>Intervention aim: Improve vaccination rates<br/>QI agent: Employers</p> <p><u>Group 1: “Choice” sites with intra-nasal LAV</u></p> <p>Patient education / reminders: Implemented an e-mail/voicemail script, and disseminated posters and fliers that clearly stated the availability of both trivalent vaccine and live attenuated (intra-nasal) vaccine.</p> <p>Delivery site change: Worksite seasonal influenza vaccination clinics targeting employees aged 18-49.</p> <p><u>Group 2: “Choice-plus” sites with intra-</u></p> | <p><u>Influenza</u><br/>Proportion of eligible patients receiving vaccination</p> <p><u>Odds ratio of receiving vaccination between treatment and control groups</u></p> | <p><u>Influenza</u><br/>Employees aged 18-49<br/>Baseline<br/>Group 1: 38.6%<br/>Group 2: 36.4%<br/>Control: 34.8%</p> <p>Follow-up – 4 months<br/>Group 1: 40.9%<br/>Group 2: 46.1%<br/>Control: 38.5%</p> <p>Employees aged 50+<br/>Baseline<br/>Group 1: 47.9%<br/>Group 2: 49.3%<br/>Group 3: 48.1%</p> <p>Follow-up – 4 months<br/>Group 1: 57.2%<br/>Group 2: 70.4%<br/>Control: 54.5%</p> <p>Follow-up – 4 months*<br/>All ages<br/>Group 1 vs control<br/>OR = 1.05 (95% CI [0.70,</p> | <p>An incentive for vaccination, an intensified advertising campaign, and offering a choice of influenza vaccines improved vaccination rates in the workplace and may be used across a variety of non-healthcare business types and sizes.</p> | 26 |

Online Supplementary Data

http://www.annfammed.org/content/10/6/538/DC1

|                           |                                                                                                                                                                                 |                                                                                                                                                                                                                                                                                                                                                                                                                                                                                                                                                                                           |                                                                                                                                                                                          |                                                                                                                                                                                                                                                                                                                                                                                                                                                                                                                                                                                                                                                                                                                               |                                                                                                                                                                                                                |                                                                                                                                                                                                                                                                                                                                                                       |                                                                                                                                                                                                                                                                                                                                                                                                                                                                                                                              |    |
|---------------------------|---------------------------------------------------------------------------------------------------------------------------------------------------------------------------------|-------------------------------------------------------------------------------------------------------------------------------------------------------------------------------------------------------------------------------------------------------------------------------------------------------------------------------------------------------------------------------------------------------------------------------------------------------------------------------------------------------------------------------------------------------------------------------------------|------------------------------------------------------------------------------------------------------------------------------------------------------------------------------------------|-------------------------------------------------------------------------------------------------------------------------------------------------------------------------------------------------------------------------------------------------------------------------------------------------------------------------------------------------------------------------------------------------------------------------------------------------------------------------------------------------------------------------------------------------------------------------------------------------------------------------------------------------------------------------------------------------------------------------------|----------------------------------------------------------------------------------------------------------------------------------------------------------------------------------------------------------------|-----------------------------------------------------------------------------------------------------------------------------------------------------------------------------------------------------------------------------------------------------------------------------------------------------------------------------------------------------------------------|------------------------------------------------------------------------------------------------------------------------------------------------------------------------------------------------------------------------------------------------------------------------------------------------------------------------------------------------------------------------------------------------------------------------------------------------------------------------------------------------------------------------------|----|
|                           |                                                                                                                                                                                 | <p>less than 5% of the influenza vaccine previously given was of the intranasal form. Those eligible to receive vaccine were workers aged 18-49 (live-attenuated vaccine) or workers of any age.</p> <p>Exclusions: Employer sites unable to provide data on number of employees and influenza vaccinations from the previous season, employers in the health care sector, sites at which the baseline vaccination rate.</p> <p>* Mean proportion per employer (sd).</p>                                                                                                                  |                                                                                                                                                                                          | <p><u>nasal LAV, increased employee outreach, and a small financial incentive.</u></p> <p>Patient education / reminders: As for group 1, except with increased numbers of fliers and E-mails according to a standardized plan.</p> <p>Financial incentives – patients: All vaccinated employees received a \$5 gift card.</p> <p>Delivery site change: As in Group 1.</p> <p><u>Control group:</u> Regular worksite immunization clinic, with LAV only for those patients specifically requesting it.</p> <p>Patient education / reminders: Regular promotional materials, without LAV-specific advertising.</p> <p>Deliver site change: As in Group 1.</p>                                                                   | <p><u>Pneumococcal</u><br/>Not targeted.</p>                                                                                                                                                                   | <p>1.57]), p = 0.808.<br/>Group 2 vs control<br/>OR = 1.40 (95% CI [1.02, 1.94]), p = 0.041.</p> <p><u>Pneumococcal</u><br/>Not targeted.</p> <p>* ORs reported from hierarchical logistic regression, adjusted for employee gender and age; and employer intervention compliance and other characteristics, including vaccination rate during the previous year.</p> |                                                                                                                                                                                                                                                                                                                                                                                                                                                                                                                              |    |
| Nuttall et al. 2003 (287) | <p>Design:<br/>CCT</p> <p>Group allocation:<br/>Experimental study with patients randomly allocated to treatment and control groups.</p> <p>Follow-up period:<br/>11 months</p> | <p>Number of patients: 90<br/>Age and gender distributions not reported.</p> <p><u>Group 1</u><br/>Number of patients: 30<br/>Age (% &gt;= 72 years) = 50%*</p> <p><u>Group 2</u><br/>Number of patients: 30<br/>Age (% &gt;= 72 years) = 50%*</p> <p><u>Control group</u><br/>Number of patients: 30<br/>Age (% &gt;= 72 years) = 50%*</p> <p><u>Eligibility criteria:</u><br/>Patients aged 65-90 years in a single GP practice, who had failed to attend the practice for influenza vaccination the previous year. Confused patients, and patients with egg allergy were excluded.</p> | <p>Number of sites: 1 GP practice</p> <p>Site affiliation: Private practice</p> <p>Number of practices or physicians: Not reported</p> <p>Location: United Kingdom (East Lancashire)</p> | <p><u>Mailed reminder letters vs patient reminder letters and educational leaflets vs patient reminder letters and home visits from a vaccination advocate</u></p> <p>Intervention aim: Improve vaccination rates<br/>QI agent: Medical clinic</p> <p><u>Group 1</u></p> <p>Patient education/ reminders: Patients received a letter from the East Lancashire Health Authority inviting them to attend their GP practice for influenza vaccination. Patients also received a leaflet entitled “Flu Jab – Beat Flu, Use a Jab”, published by the UK Department of Health.</p> <p><u>Group 2</u></p> <p>Patient education / reminders: Patients received a reminder letter, as above. Patients also received a visit from a</p> | <p><u>Influenza</u><br/>Proportion of eligible patients receiving vaccination</p> <p>Odds ratio of receiving vaccination between treatment and control groups</p> <p><u>Pneumococcal</u><br/>Not targeted.</p> | <p><u>Influenza</u><br/>Follow-up<br/>Group 1: 7/30 (23%)<br/>Group 2: 12/30 (40%)<br/>Control: 8/30 (27%)</p> <p>Overall test of significance<br/>P = 0.329</p> <p>Follow-up<br/>Group 1<br/>OR = 0.84<br/>P = 1.00</p> <p>Group 2<br/>OR = 1.83<br/>P = 0.61</p> <p><u>Pneumococcal</u><br/>Not targeted.</p>                                                       | <p>The three modalities (reminder only, reminder and education, reminder and visit) are not different in their effect on influenza vaccination rates.</p> <p>An analysis of patients within age strata (aged &lt;72 years, aged &gt;= 72 years) was performed. Uptake appeared higher in patients aged &gt;= 72 years who received a personal visit (Group 3) vs patients receiving a reminder letter only or a reminder letter and a leaflet (Groups 1 and 2). However, this finding was not statistically significant.</p> | 22 |

Online Supplementary Data

http://www.annfammed.org/content/10/6/538/DC1

|                         |                                                                                                                                                                                                  |                                                                                                                                                                                                                                                                                                                                                                                                                                                                                                                                                                                                                                                                                                |                                                                                                                                                                                                                                                                                                                                                                                                    |                                                                                                                                                                                                                                                                                                                                                                                                                                                                                                                                                                                                                                                                                                                                                                                                                                             |                                                                                                                                                                                      |                                                                                                                                                                                                                                                                                                                                                                                              |                                                                                                                                                                           |    |
|-------------------------|--------------------------------------------------------------------------------------------------------------------------------------------------------------------------------------------------|------------------------------------------------------------------------------------------------------------------------------------------------------------------------------------------------------------------------------------------------------------------------------------------------------------------------------------------------------------------------------------------------------------------------------------------------------------------------------------------------------------------------------------------------------------------------------------------------------------------------------------------------------------------------------------------------|----------------------------------------------------------------------------------------------------------------------------------------------------------------------------------------------------------------------------------------------------------------------------------------------------------------------------------------------------------------------------------------------------|---------------------------------------------------------------------------------------------------------------------------------------------------------------------------------------------------------------------------------------------------------------------------------------------------------------------------------------------------------------------------------------------------------------------------------------------------------------------------------------------------------------------------------------------------------------------------------------------------------------------------------------------------------------------------------------------------------------------------------------------------------------------------------------------------------------------------------------------|--------------------------------------------------------------------------------------------------------------------------------------------------------------------------------------|----------------------------------------------------------------------------------------------------------------------------------------------------------------------------------------------------------------------------------------------------------------------------------------------------------------------------------------------------------------------------------------------|---------------------------------------------------------------------------------------------------------------------------------------------------------------------------|----|
|                         |                                                                                                                                                                                                  | * Randomization was stratified on age <72 years and >= 72 years.                                                                                                                                                                                                                                                                                                                                                                                                                                                                                                                                                                                                                               |                                                                                                                                                                                                                                                                                                                                                                                                    | researcher. At patient visits, facts taken from the “Flu Jab – Beat Flu, Use a Jab” leaflet were provided in a one-on-one basis.<br><br><u>Control group</u><br><br>Patient education / reminders: Patients received a letter from the East Lancashire Health Authority inviting them to attend their GP practice for influenza vaccination.                                                                                                                                                                                                                                                                                                                                                                                                                                                                                                |                                                                                                                                                                                      |                                                                                                                                                                                                                                                                                                                                                                                              |                                                                                                                                                                           |    |
| Ohmit et al. 1995 (288) | Design:<br>Cluster RCT<br><br>Group allocation:<br>Experimental study with seven Michigan state counties randomly allocated to treatment and control groups.<br><br>Follow-up period:<br>2 years | Number of patients: 4211*<br><br><u>Group 1</u><br>Not reported<br><br><u>Control group</u><br>Not reported<br><br><u>Eligibility criteria:</u><br>The intervention was targeted to patients aged 65 years or older. Effectiveness of the intervention was measured in a study sample consisting of patients presenting to hospital with pneumonia and a matched set of 2 community subjects per pneumonia patient.<br><br>* Number of patient responding to the outcomes survey. Response rates were 75 to 84%. Intervention and control group breakdowns not reported. Patients were sampled from pneumonia hospitalization, and community subjects matched to hospitalized patients on age. | Site description: Study was run with the cooperation of the Michigan state Department of Health<br><br>Site affiliation:<br>Government, Medicare<br><br>Number of sites: 7 counties in Michigan*<br><br>Number of practices or physicians: Not reported<br><br>Location: Unites States (Michigan)<br><br>* Sites were randomly allocated to treatment (4 counties) or control (3 counties) groups. | <u>Clinician education, patient reminder, mass media campaign, and vaccination clinic outreach vs usual care</u><br><br>Intervention aim: Improve vaccination rates<br>QI agent: State Department of Health<br><br><u>Group 1</u><br><br>Clinician education: Physicians were supplied with education al materials about the importance of providing vaccine to high-risk patients.<br><br>Patient education / reminders: Post cards were sent to patients, reminding them to make appointments for their influenza vaccinations. A promotional letter was sent to Medicare beneficiaries. Mass media campaigns were also organized.<br><br>Delivery site changes: Immunization clinics were organized in shopping malls and other locations in which elderly subjects lived or congregated.<br><br><u>Control group</u><br><br>Usual care. | <u>Influenza</u><br>Odds ratio of receiving vaccination associated with living in an intervention region<br><br><br><br><br><br><br><br><br><br><u>Pneumococcal</u><br>Not targeted. | <u>Influenza</u><br>Follow-up – 1990-91<br>Patients from the community<br>OR = 2.02<br>P<0.001*<br><br>Patients previously hospitalized for pneumonia<br>OR = 1.28<br>P<0.165*<br><br>Follow-up – 1991-92<br>Patients from the community<br>OR = 1.87<br>P<0.001*<br><br>Patients previously hospitalized for pneumonia<br>OR = 2.06<br>P<0.001*<br><br><u>Pneumococcal</u><br>Not targeted. | The community intervention program had a significant and important impact on increasing the likelihood of immunization among elderly persons living in the targeted area. | 18 |
| Puech et al. 1998 (289) | Design:<br>RCT<br><br>Group allocation:<br>Experimental                                                                                                                                          | Number of patients: 325<br><br><u>Group 1</u><br>Number of patients: 154<br>Female/male: 96/58                                                                                                                                                                                                                                                                                                                                                                                                                                                                                                                                                                                                 | Number of sites: 1 three-partner bulk billing general practice<br><br>Site affiliation: Private                                                                                                                                                                                                                                                                                                    | <u>Mailed patient reminder postcard vs usual care</u><br><br>Intervention aim: Improve vaccination rates                                                                                                                                                                                                                                                                                                                                                                                                                                                                                                                                                                                                                                                                                                                                    | <u>Influenza</u><br>Proportion of eligible patients receiving vaccination                                                                                                            | <u>Influenza</u><br>Baseline<br>Males<br>Group 1: 22/58 (38%)<br>Control: 29/67 (43%)                                                                                                                                                                                                                                                                                                        | After adjusting for baseline vaccination status, the postcard reminder significantly increased influenza vaccination rates in men but not in women.                       | 24 |

Online Supplementary Data

http://www.annfammed.org/content/10/6/538/DC1

|                                  |                                                                                                                                                                          |                                                                                                                                                                                                                                                                                                                                                                                                                                                                                                                                                                                                               |                                                                                                                                                                                                                                                                                                                                             |                                                                                                                                                                                                                                                                                                                                                                                                                                                                                                                                                                                                                              |                                                                                                                                                                                        |                                                                                                                                                                                                                                                                                                                                                                                                   |                                                                                                                                                                                                                                                                                                                                            |           |
|----------------------------------|--------------------------------------------------------------------------------------------------------------------------------------------------------------------------|---------------------------------------------------------------------------------------------------------------------------------------------------------------------------------------------------------------------------------------------------------------------------------------------------------------------------------------------------------------------------------------------------------------------------------------------------------------------------------------------------------------------------------------------------------------------------------------------------------------|---------------------------------------------------------------------------------------------------------------------------------------------------------------------------------------------------------------------------------------------------------------------------------------------------------------------------------------------|------------------------------------------------------------------------------------------------------------------------------------------------------------------------------------------------------------------------------------------------------------------------------------------------------------------------------------------------------------------------------------------------------------------------------------------------------------------------------------------------------------------------------------------------------------------------------------------------------------------------------|----------------------------------------------------------------------------------------------------------------------------------------------------------------------------------------|---------------------------------------------------------------------------------------------------------------------------------------------------------------------------------------------------------------------------------------------------------------------------------------------------------------------------------------------------------------------------------------------------|--------------------------------------------------------------------------------------------------------------------------------------------------------------------------------------------------------------------------------------------------------------------------------------------------------------------------------------------|-----------|
|                                  | <p>study, with patients randomly allocated to treatment and control groups.</p> <p>Follow-up period: 8 months</p>                                                        | <p>Age (mean(sd)): Not reported</p> <p><u>Control group</u><br/>Number of patients: 171<br/>Female/male: 104/67<br/>Age (mean(sd)): Not reported</p> <p><u>Eligibility criteria:</u><br/>Patients aged 65 years or older at a single general practice. Patients had attended the practice at least 3 times, and at least once in the previous 2 years. Nursing home patients; and patients who had already received influenza vaccination, were allergic to egg, were previously known to decline vaccination, had severe or terminal illness, dementia or unstable psychiatric conditions were excluded.</p> | <p>practice</p> <p>Number of practices or physicians: 1 (as above)</p> <p>Location: Australia (New South Wales)</p>                                                                                                                                                                                                                         | <p>QI agent: Medical clinic</p> <p><u>Group 1</u></p> <p>Patient education / reminders: Patients were mailed a postcard encouraging them to attend the practice for an influenza vaccination. The text stressed the seriousness of influenza as opposed to the effectiveness and safety of the vaccination, and provided availability and const information.</p> <p><u>Control group</u></p> <p>Usual care</p>                                                                                                                                                                                                               | <p>Odds ratio of receiving vaccination between treatment and control groups</p> <p><u>Pneumococcal</u><br/>Not targeted.</p>                                                           | <p>Females<br/>Group 1: 28/96 (29%)<br/>Control: 36/104 (35%)</p> <p>Follow-up<br/>Males<br/>Group 1: 37/58 (64%)<br/>Control: 31/67 (46%)</p> <p>Females<br/>Group 1: 47/96 (49%)<br/>Control: 46/104 (44%)</p> <p>Follow-up<br/>Males<br/>OR = 3.0*<br/>P = 0.01</p> <p>Females<br/>OR = 1.5*<br/>P = 0.24</p> <p><u>Pneumococcal</u><br/>Not targeted.</p> <p>* See next column, at right.</p> | <p>The reason for the sex-linked difference in intervention-attributable vaccination rates is not clear.</p> <p>* Odd ratios adjusted for baseline vaccination status by logistic regression.</p>                                                                                                                                          |           |
| <p>Quinley et al. 2004 (290)</p> | <p>Design: Cluster RCT</p> <p>Group allocation: Experimental study with medical practices allocated to treatment and control groups.</p> <p>Follow-up period: 1 year</p> | <p>Number of patients: Not reported</p> <p><u>Group 1</u><br/>Number of patients: Not reported</p> <p><u>Control group</u><br/>Number of patients: Not reported</p> <p><u>Eligibility criteria:</u><br/>Medicare patients aged 65 years or older seen by the physician for at least one outpatient visit during 1999. Physicians had a cumulative pneumococcal vaccination rate of 40% or lower, and were either "high-volume" (&gt;= 200 Medicare patients in 1999) or</p>                                                                                                                                   | <p>Number of sites: The state designated Medicare quality improvement organization conducted a large scale QI project.</p> <p>Site affiliation: Government, Medicare</p> <p>Number of practices or physicians: 950 medical practices*, with 1118 physicians**</p> <p>Location: United States (New York)</p> <p>* Medical practices were</p> | <p><u>Audit and feedback toolkit with telephone GP outreach vs audit and feedback toolkit alone</u></p> <p>Intervention aim: Improve vaccination rates<br/>QI agent: Medicare quality improvement organization</p> <p><u>Group 1</u></p> <p>Audit and feedback: Physicians received a mailing describing the proportion of the physician's pneumococcal vaccine-eligible patient panel receiving vaccination. A list of eligible patients was also provided. Practices also received a package with chart reminder stickers and patient educational materials, however, less than 50% of practices chose to deploy these</p> | <p><u>Influenza</u><br/>Not targeted.</p> <p><u>Pneumococcal *</u><br/>Proportion of eligible patients receiving vaccination</p> <p>Change from baseline performance, treated as a</p> | <p><u>Influenza</u><br/>Not targeted.</p> <p><u>Pneumococcal *</u><br/>Baseline<br/>AA practices<br/>Group 1: 19%<br/>Control: 18%</p> <p>HV practices with baseline vaccination rate &gt;30%<br/>Group 1: 36%<br/>Control: 35%</p> <p>HV practices with baseline vaccination rate &lt;30%<br/>Group 1: 21%<br/>Control: 21%</p> <p>Follow-up<br/>AA practices</p>                                | <p>The use of a simple telephone reminder to physician practices was able to significantly increase pneumococcal immunization rates among physicians receiving Medicare claims based feedback on their performance.</p> <p>However, this conclusion is borne out by the analysis <i>only</i> for low-performing high-volume practices.</p> | <p>23</p> |

Online Supplementary Data

http://www.annfammed.org/content/10/6/538/DC1

|                                 |                                                                                                                                                                    | <p>“African-American servicing” (&gt;= 30 Medicare-enrolled African American patients, comprising &gt;= 20% of the physician’s Medicare panel). Exclusions: Managed care plan enrollment.</p>                                | <p>allocated to treatment and control, stratified by high volume practices (HV) and African-American servicing practices (AA), as below:</p> <table border="1"> <thead> <tr> <th></th> <th>Tx</th> <th>Control</th> </tr> </thead> <tbody> <tr> <td>AA</td> <td>118</td> <td>100</td> </tr> <tr> <td>HV</td> <td>582</td> <td>150</td> </tr> </tbody> </table> <p>** Includes physicians in a non-randomized arm, results of which are not reproduced here.</p> |                                                                                                                                                                                                                                                                                                         | Tx                                                                                                                                                                | Control                                                                                                                                                                                            | AA                                                                                                                                                                                                                                                                                                                                                                     | 118 | 100 | HV | 582 | 150 | <p>interventions.</p> <p>CQI (or similar): The quality improvement organization telephoned clinicians receiving the mailed intervention package to confirm receipt of the mailings, determine the practice’s own opinion regarding practice improvement, and discuss potential methods for improving performance.</p> <p><u>Control group</u></p> <p>Audit and feedback, as above.</p> | <p>continuous outcome for each practice</p> <p>Proportion of physician practices improving &gt;5% from baseline</p> <p>* Outcomes for the HV practices without stratification by baseline performance are available as well. Numerous outcomes were tested, few were significant.</p> | <p>Group 1: +4.45%<br/>Control: +2.36%<br/>P = 0.068</p> <p>HV practices with baseline vaccination rate &gt;30%<br/>Group 1: +2.51%<br/>Control: +2.55%<br/>P = 0.943</p> <p>HV practices with baseline vaccination rate &lt;30%<br/>Group 1: +3.86%<br/>Control: +2.21%<br/>P = 0.007</p> <p>Follow-up<br/>AA practices<br/>Group 1: 33.9%<br/>Control: 22.0%<br/>P = 0.052</p> <p>HV practices with baseline vaccination rate &gt;30%<br/>Group 1: 25.0%<br/>Control: 21.8%<br/>P = 0.554</p> <p>HV practices with baseline vaccination rate &lt;30%<br/>Group 1: 29.0%<br/>Control: 11.1%<br/>P = 0.002</p> <p>* See previous column notes.</p> |  |
|---------------------------------|--------------------------------------------------------------------------------------------------------------------------------------------------------------------|------------------------------------------------------------------------------------------------------------------------------------------------------------------------------------------------------------------------------|-----------------------------------------------------------------------------------------------------------------------------------------------------------------------------------------------------------------------------------------------------------------------------------------------------------------------------------------------------------------------------------------------------------------------------------------------------------------|---------------------------------------------------------------------------------------------------------------------------------------------------------------------------------------------------------------------------------------------------------------------------------------------------------|-------------------------------------------------------------------------------------------------------------------------------------------------------------------|----------------------------------------------------------------------------------------------------------------------------------------------------------------------------------------------------|------------------------------------------------------------------------------------------------------------------------------------------------------------------------------------------------------------------------------------------------------------------------------------------------------------------------------------------------------------------------|-----|-----|----|-----|-----|----------------------------------------------------------------------------------------------------------------------------------------------------------------------------------------------------------------------------------------------------------------------------------------------------------------------------------------------------------------------------------------|---------------------------------------------------------------------------------------------------------------------------------------------------------------------------------------------------------------------------------------------------------------------------------------|----------------------------------------------------------------------------------------------------------------------------------------------------------------------------------------------------------------------------------------------------------------------------------------------------------------------------------------------------------------------------------------------------------------------------------------------------------------------------------------------------------------------------------------------------------------------------------------------------------------------------------------------------|--|
|                                 | Tx                                                                                                                                                                 | Control                                                                                                                                                                                                                      |                                                                                                                                                                                                                                                                                                                                                                                                                                                                 |                                                                                                                                                                                                                                                                                                         |                                                                                                                                                                   |                                                                                                                                                                                                    |                                                                                                                                                                                                                                                                                                                                                                        |     |     |    |     |     |                                                                                                                                                                                                                                                                                                                                                                                        |                                                                                                                                                                                                                                                                                       |                                                                                                                                                                                                                                                                                                                                                                                                                                                                                                                                                                                                                                                    |  |
| AA                              | 118                                                                                                                                                                | 100                                                                                                                                                                                                                          |                                                                                                                                                                                                                                                                                                                                                                                                                                                                 |                                                                                                                                                                                                                                                                                                         |                                                                                                                                                                   |                                                                                                                                                                                                    |                                                                                                                                                                                                                                                                                                                                                                        |     |     |    |     |     |                                                                                                                                                                                                                                                                                                                                                                                        |                                                                                                                                                                                                                                                                                       |                                                                                                                                                                                                                                                                                                                                                                                                                                                                                                                                                                                                                                                    |  |
| HV                              | 582                                                                                                                                                                | 150                                                                                                                                                                                                                          |                                                                                                                                                                                                                                                                                                                                                                                                                                                                 |                                                                                                                                                                                                                                                                                                         |                                                                                                                                                                   |                                                                                                                                                                                                    |                                                                                                                                                                                                                                                                                                                                                                        |     |     |    |     |     |                                                                                                                                                                                                                                                                                                                                                                                        |                                                                                                                                                                                                                                                                                       |                                                                                                                                                                                                                                                                                                                                                                                                                                                                                                                                                                                                                                                    |  |
| Satterthwaite et al. 1997 (291) | <p>Design: CCT</p> <p>Group allocation: Experimental study with patients randomly allocated to treatment and control groups.</p> <p>Follow-up period: Unclear.</p> | <p>Number of patients: 2791<br/>Age and gender not reported.</p> <p><u>Group 1</u><br/>Number of patients: 931</p> <p><u>Group 2</u><br/>Number of patients: 930</p> <p><u>Control group</u><br/>Number of patients: 930</p> | <p>Site description: General practices</p> <p>Site affiliation: Private practices</p> <p>Number of sites: 16 general practices</p> <p>Number of practices or physicians: See above.</p>                                                                                                                                                                                                                                                                         | <p><u>Personalized patient reminder letters vs patient reminder letters with free vaccinations vs usual care</u></p> <p>Intervention aim: Improve vaccination rates<br/>QI agent: Medical clinics</p> <p><u>Group 1</u></p> <p>Patient education / reminders: A personalized invitation was sent to</p> | <p><u>Influenza</u><br/>Proportion of eligible patients receiving vaccination</p> <p>Odds ratio of receiving vaccination between treatment and control groups</p> | <p><u>Influenza</u><br/>Follow-up<br/>Group 1: 247/931 (27%)<br/>Group 2: 422/930 (45%)<br/>Control: 159/930 (17%)</p> <p>Follow-up<br/>Group 1<br/>OR = 1.75<br/>P &lt; 0.001</p> <p>Group 2:</p> | <p>In Australia, patients, or their private insurers, typically pay \$20 for influenza vaccination. The study provides evidence that:</p> <ul style="list-style-type: none"> <li>- General practitioners should be recommended to routinely invite patients aged 65 years or more to have a flu vaccine.</li> <li>- At the level of the Ministry of Health,</li> </ul> | 21  |     |    |     |     |                                                                                                                                                                                                                                                                                                                                                                                        |                                                                                                                                                                                                                                                                                       |                                                                                                                                                                                                                                                                                                                                                                                                                                                                                                                                                                                                                                                    |  |

Online Supplementary Data

http://www.annfammed.org/content/10/6/538/DC1

|                            |                                                                                                                                                                                     |                                                                                                                                                                                                                                                                                                                                                                                                                                                                                                                                                                                                                                                                                                                                                                                                                                                                 |                                                                                                                                                                                                                                                                                                                                                             |                                                                                                                                                                                                                                                                                                                                                                                                                                                                                                                                                                                                                                                                                                                                                                                                                                                                                                                                                                                                                                 |                                                                                                                                                                                                                                                                                       |                                                                                                                                                                                                                                                                                                                                                                                                                                                                                                                                                                                                                    |                                                                                                                                                                                                                                                                                                                                                                                                                                                                                                                                                                                                                                                    |    |
|----------------------------|-------------------------------------------------------------------------------------------------------------------------------------------------------------------------------------|-----------------------------------------------------------------------------------------------------------------------------------------------------------------------------------------------------------------------------------------------------------------------------------------------------------------------------------------------------------------------------------------------------------------------------------------------------------------------------------------------------------------------------------------------------------------------------------------------------------------------------------------------------------------------------------------------------------------------------------------------------------------------------------------------------------------------------------------------------------------|-------------------------------------------------------------------------------------------------------------------------------------------------------------------------------------------------------------------------------------------------------------------------------------------------------------------------------------------------------------|---------------------------------------------------------------------------------------------------------------------------------------------------------------------------------------------------------------------------------------------------------------------------------------------------------------------------------------------------------------------------------------------------------------------------------------------------------------------------------------------------------------------------------------------------------------------------------------------------------------------------------------------------------------------------------------------------------------------------------------------------------------------------------------------------------------------------------------------------------------------------------------------------------------------------------------------------------------------------------------------------------------------------------|---------------------------------------------------------------------------------------------------------------------------------------------------------------------------------------------------------------------------------------------------------------------------------------|--------------------------------------------------------------------------------------------------------------------------------------------------------------------------------------------------------------------------------------------------------------------------------------------------------------------------------------------------------------------------------------------------------------------------------------------------------------------------------------------------------------------------------------------------------------------------------------------------------------------|----------------------------------------------------------------------------------------------------------------------------------------------------------------------------------------------------------------------------------------------------------------------------------------------------------------------------------------------------------------------------------------------------------------------------------------------------------------------------------------------------------------------------------------------------------------------------------------------------------------------------------------------------|----|
|                            |                                                                                                                                                                                     | <p><u>Eligibility criteria:</u> Patients aged 65 years or more, attending a participating general practitioner.</p>                                                                                                                                                                                                                                                                                                                                                                                                                                                                                                                                                                                                                                                                                                                                             | <p>Location: New Zealand (Auckland)</p>                                                                                                                                                                                                                                                                                                                     | <p>eligible patients recommending that they visit their general practitioner to receive a flu vaccination.</p> <p><u>Group 2</u></p> <p>Patient education / reminders: As above.</p> <p>Financial incentives – patients: Patients received the flu vaccination from their general practitioner at no cost.</p> <p><u>Control group</u></p> <p>Usual care</p>                                                                                                                                                                                                                                                                                                                                                                                                                                                                                                                                                                                                                                                                    | <p><u>Pneumococcal</u><br/>Not targeted.</p>                                                                                                                                                                                                                                          | <p>OR = 4.02<br/>P &lt; 0.001</p> <p><u>Pneumococcal</u><br/>Not targeted.</p>                                                                                                                                                                                                                                                                                                                                                                                                                                                                                                                                     | <p>serious consideration should be given to making the vaccine available at no cost to this age group.</p>                                                                                                                                                                                                                                                                                                                                                                                                                                                                                                                                         |    |
| Schensul et al. 2009 (292) | <p>Design: Cluster-CBA</p> <p>Group allocation: Public housing buildings were allocated to treatment and control arms by study investigators.</p> <p>Follow-up period: 7 months</p> | <p>Number of patients: 180</p> <p><u>Group 1</u><br/>Number of patients: 107<br/>Female/male: 35%/65%<br/>Age (mean(sd)): 57</p> <p><u>Control group</u><br/>Number of patients: 73<br/>Female/male: 44%/56%<br/>Age (mean(sd)): 62</p> <p><u>Eligibility criteria</u><br/>Resident of one of the study sites – i.e.: public housing residents aged 62 years or older, or younger individuals with disabilities. Residents were excluded if they were under 18 years of age, under conservatorship, unable to understand or answer questions in English or Spanish, or initiation of building residency after the first flu campaign.</p> <p>* The number of tenants exposed to the intervention is not reported. A serial cross sectional design was employed, with survey data on 180 tenants at baseline, and 189 tenants at 4 months. Numbers of survey</p> | <p>Number of sites: Two public housing buildings home to low-income, ethnically diverse seniors, as well as younger disabled adults*</p> <p>Site affiliation: State/municipal public housing</p> <p>Number of practices or physicians: Not applicable</p> <p>Location: United States (Connecticut)</p> <p>*1 intervention building, 1 control building.</p> | <p><u>Community engagement for improving influenza vaccination vs no intervention</u></p> <p>Intervention aim: Improve vaccination rates<br/>QI agent: Tenants of the public housing building, with help from study researchers and a stakeholder advisory body</p> <p><u>Group 1</u></p> <p>Community engagement: The Vaccinate for Influenza Prevention (VIP) Committee was composed of 9 building residents. Researchers facilitated an engagement process, which empowered VIP Committee members to promote building-wide pro-vaccination culture and practices. The VIP committee was supported by an advisory board of collaborating agencies. The goal of the multi-layered engagement strategy was to carry out a vaccination campaign and improve vaccination rates among building residents.</p> <p>Delivery site change: Vaccination clinics for tenants were held in the building.</p> <p>Patient education / reminders: Posters and flyers were produced. A 3-hour long Flu Fair was held, involving Q &amp; A</p> | <p><u>Influenza</u><br/>Proportion of eligible patients receiving vaccination</p> <p>Change in proportion of eligible patients receiving vaccination</p> <p>Odds ratio of receiving vaccination between treatment and control groups</p> <p><u>Pneumococcal</u><br/>Not targeted.</p> | <p><u>Influenza</u><br/>Baseline<br/>Group 1: 36/107 (30%)<br/>Control: Not reported</p> <p>Follow-up<br/>Group 1: 73/103 (71%)<br/>Control: Not reported</p> <p>Follow-up<br/>Group 1: +41%<br/>Control: +18%<br/>P = 0.10*</p> <p>Follow-up<br/>OR = 2.90**<br/>P = 0.022</p> <p><u>Pneumococcal</u><br/>Not targeted.</p> <p>* Method of testing the difference between increases in intervention and control buildings unclear.<br/>** From the logistic regression coefficient for intervention building status, adjusting for initial vaccination rates, patient age, income, and beliefs about the flu.</p> | <p>The VIP project embodied a multi-level approach that engaged older low income African American and Latino adults, enabling them to integrate their own knowledge with scientific knowledge about influenza and vaccination, and to convey their understandings through creative campaigns with and for their peers. This intervention significantly increased levels of pro-vaccination knowledge, beliefs, and norms, and resulted in improved vaccination rates. Due to the emphasis on capacity building and multi-level engagement, the intervention appears to have been sustained with little ongoing support from the research team.</p> | 20 |



Online Supplementary Data

http://www.annfammed.org/content/10/6/538/DC1

|                           |                                                                                                                                                                                                                                           |                                                                                                                                                                                                                                                                                                                                                                                                                                                                                                                                                                                                                                                                |                                                                                                                                                                                                                                                        |                                                                                                                                                                                                                                                                                                                                                                                                                                                                                                                                                                                                                                                                                                                                                                                                   |                                                                                                                                                                                                                                                                                                                                        |                                                                                                                                                                                                                                                                                                                                                                                                                                                                                                                                   |                                                                                                                                                                                                                                                                                                                                                          |    |
|---------------------------|-------------------------------------------------------------------------------------------------------------------------------------------------------------------------------------------------------------------------------------------|----------------------------------------------------------------------------------------------------------------------------------------------------------------------------------------------------------------------------------------------------------------------------------------------------------------------------------------------------------------------------------------------------------------------------------------------------------------------------------------------------------------------------------------------------------------------------------------------------------------------------------------------------------------|--------------------------------------------------------------------------------------------------------------------------------------------------------------------------------------------------------------------------------------------------------|---------------------------------------------------------------------------------------------------------------------------------------------------------------------------------------------------------------------------------------------------------------------------------------------------------------------------------------------------------------------------------------------------------------------------------------------------------------------------------------------------------------------------------------------------------------------------------------------------------------------------------------------------------------------------------------------------------------------------------------------------------------------------------------------------|----------------------------------------------------------------------------------------------------------------------------------------------------------------------------------------------------------------------------------------------------------------------------------------------------------------------------------------|-----------------------------------------------------------------------------------------------------------------------------------------------------------------------------------------------------------------------------------------------------------------------------------------------------------------------------------------------------------------------------------------------------------------------------------------------------------------------------------------------------------------------------------|----------------------------------------------------------------------------------------------------------------------------------------------------------------------------------------------------------------------------------------------------------------------------------------------------------------------------------------------------------|----|
|                           |                                                                                                                                                                                                                                           | responders at baseline are reported here.                                                                                                                                                                                                                                                                                                                                                                                                                                                                                                                                                                                                                      |                                                                                                                                                                                                                                                        | <p>sessions with influenza/vaccine experts, flu related games, a film screening, and testimony by VIP Committee members. The Flu Fair followed the philosophy of fostering a “constructivist dialogue for informed decision-making”.</p> <p><u>Control group</u></p> <p>No intervention</p>                                                                                                                                                                                                                                                                                                                                                                                                                                                                                                       |                                                                                                                                                                                                                                                                                                                                        |                                                                                                                                                                                                                                                                                                                                                                                                                                                                                                                                   |                                                                                                                                                                                                                                                                                                                                                          |    |
| Shah et al. 2006 (293)    | <p>Design:<br/>Cluster PCS</p> <p>Group allocation:<br/>Observational study with geographic regions served by two emergency medical services agencies allocated to treatment and control groups.</p> <p>Follow-up period:<br/>2 weeks</p> | <p>Number of patients: 401</p> <p><u>Group 1</u><br/>Number of patients: 149<br/>Female/male: 80/69<br/>Age (mean(sd)): 79 (sd not reported)</p> <p><u>Control group</u><br/>Number of patients: 96<br/>Female/male: 56/40<br/>Age (mean(sd)): 77 (sd not reported)</p> <p><u>Eligibility criteria:</u><br/>Patients aged 65 years or older, residing in one of the study counties, cared for by one of the study EMS agencies.<br/>Exclusion: Non-English speakers, previously included in the study, institutionalized.</p> <p>* 401 eligible patients entered into the study. Results are reported only for 247 patients completing a follow-up survey.</p> | <p>Number of sites: 2<br/>Regional emergency medical services (EMS) agencies</p> <p>Site affiliation: Site affiliation: Government/public sector</p> <p>Number of practices or physicians: Not reported.</p> <p>Location: United States (New York)</p> | <p><u>EMS preventive screening program for elderly patients vs usual care</u></p> <p>Intervention aim: Improve elder care<br/>QI agent: Regional EMS agency</p> <p><u>Group 1</u></p> <p>Team change: EMTs screened community-dwelling patients aged 65 years or older during emergency responses to evaluate the risk of falling, need for pneumococcal vaccination, and need for influenza vaccination.</p> <p>Patient education: EMTs provided patients with influenza and pneumococcal vaccination informational materials produced by the CDC after screening for eligibility.</p> <p>Clinician reminders: The emergency medical services agency notified patients’ primary care physicians if patients had screened positive on any item.</p> <p><u>Control group</u></p> <p>Usual care</p> | <p><u>Influenza</u><br/>Proportion of eligible patients receiving vaccination</p> <p>Odds ratio of receiving vaccination between treatment and control groups</p> <p><u>Pneumococcal</u><br/>Proportion of eligible patients receiving vaccination</p> <p>Odds ratio of receiving vaccination between treatment and control groups</p> | <p><u>Influenza</u><br/>Baseline<br/>Group 1: 29/45 (64%)<br/>Control: 18/33 (55%)</p> <p>Follow-up<br/>Group 1: 4/16 (25%)<br/>Control: 5/15 (33%)</p> <p>Follow-up<br/>OR = 0.67<br/>P = 0.70*</p> <p><u>Pneumococcal</u><br/>Baseline<br/>Group 1: 102/149 (68%)<br/>Control: 63/96 (66%)</p> <p>Follow-up<br/>Group 1: 10/47 (21%)<br/>Control: 1/33 (3%)</p> <p>Follow-up<br/>OR = 8.65<br/>P = 0.02</p> <p>* Reported in this study as P = 1.0. The P-value was recalculated by one reviewer using Fisher’s exact test.</p> | <p>This program resulted in statistically and clinically significant greater pneumococcal vaccination rates than in the control group, although no differences were observed in influenza vaccination rates.</p> <p>Additionally, a high rate of EMS screening demonstrated the feasibility of an EMS preventive screening program for older adults.</p> | 21 |
| Shenson et al. 2001 (294) | <p>Design:<br/>Cluster PCS</p> <p>Group allocation:<br/>Observation study</p>                                                                                                                                                             | <p>Number of patients: 24033<br/>Age and gender distributions not reported</p> <p>Group 1</p>                                                                                                                                                                                                                                                                                                                                                                                                                                                                                                                                                                  | <p>Number of sites: 1<br/>community engaged action-research initiative, led by a community steering committee.</p>                                                                                                                                     | <p><u>Community-organized social media campaign vs usual care</u></p> <p>Intervention aim: Improve vaccination rates</p>                                                                                                                                                                                                                                                                                                                                                                                                                                                                                                                                                                                                                                                                          | <p><u>Influenza</u><br/>Not targeted.</p> <p><u>Pneumococcal</u><br/>Proportion of eligible patients</p>                                                                                                                                                                                                                               | <p><u>Influenza</u><br/>Not targeted.</p> <p><u>Pneumococcal</u><br/>Baseline</p>                                                                                                                                                                                                                                                                                                                                                                                                                                                 | <p>It is possible to significantly increase the use of pneumococcal immunizations by linking their delivery to community-based flu clinics and by developing a</p>                                                                                                                                                                                       | 16 |

Online Supplementary Data

http://www.annfammed.org/content/10/6/538/DC1

|                           |                                                                                                                                                                  |                                                                                                                                                                                                                                                                                                                                                                         |                                                                                                                                                                                                           |                                                                                                                                                                                                                                                                                                                                                                                                                                                                                                                                                                                                                                                                                                                                                                                                                                                                                                                                                                               |                                                                                                                                                                                                                |                                                                                                                                                                                                                                                                  |                                                                                                                                                                                                                                                                                                                                  |    |
|---------------------------|------------------------------------------------------------------------------------------------------------------------------------------------------------------|-------------------------------------------------------------------------------------------------------------------------------------------------------------------------------------------------------------------------------------------------------------------------------------------------------------------------------------------------------------------------|-----------------------------------------------------------------------------------------------------------------------------------------------------------------------------------------------------------|-------------------------------------------------------------------------------------------------------------------------------------------------------------------------------------------------------------------------------------------------------------------------------------------------------------------------------------------------------------------------------------------------------------------------------------------------------------------------------------------------------------------------------------------------------------------------------------------------------------------------------------------------------------------------------------------------------------------------------------------------------------------------------------------------------------------------------------------------------------------------------------------------------------------------------------------------------------------------------|----------------------------------------------------------------------------------------------------------------------------------------------------------------------------------------------------------------|------------------------------------------------------------------------------------------------------------------------------------------------------------------------------------------------------------------------------------------------------------------|----------------------------------------------------------------------------------------------------------------------------------------------------------------------------------------------------------------------------------------------------------------------------------------------------------------------------------|----|
|                           | <p>with geographic regions allocated to treatment and control.</p> <p>Follow-up period: 1 year</p>                                                               | <p>Number of patients: 5541*</p> <p><u>Control group</u><br/>Number of patients: 18492*</p> <p><u>Eligibility criteria:</u><br/>Medicare beneficiaries aged 65 years or older. Pneumococcal vaccination was provided to patients with no previous history of vaccination.</p> <p>* At post-intervention cross-sectional measurement.</p>                                | <p>Site affiliation: Community non-profit organizations, government, private or academic practices</p> <p>Number of practices or physicians: Not reported</p> <p>Location: United States (New York)</p>   | <p>QI agent: Community steering committee</p> <p><u>Group 1</u></p> <p>Community engagement: The intervention and research was directed by a steering committee comprised of the department of health representatives, care providers, consumers, the county chapter of the AARP, and a local church representatives.</p> <p>Patient education / reminders: A mailed letter signed by the county health commissioner and a well-known physician urged elders to obtain an annual flu shot and pneumococcal vaccination. A list of local organizations endorsing the initiative was printed on the sidebar of the letter. Content focused on the availability of the flu shot in the community setting. Additionally, a mass media campaign was organized. This consisted of a call-in radio show, paid television and radio advertisements, and press kits.</p> <p><u>Control group</u></p> <p>Usual care, likely subject to routine New York state vaccination outreach.</p> | <p>receiving vaccination</p> <p>Odds ratio of receiving vaccination between treatment and control groups</p>                                                                                                   | <p>Group 1: 421/5542 (8%)<br/>Control: 1220/18492 (7%)</p> <p>Follow-up<br/>Group 1: 833/5111 (16%)<br/>Control: 2116/17342 (12%)</p> <p>Follow-up<br/>OR = 1.40<br/>P &lt; 0.001*</p> <p>* Not reported in original study. Calculated by present reviewers.</p> | <p>broad-based outreach campaign to market the benefits and availability of adult immunizations.</p> <p>Researchers observed a shift in immunizations from private medical clinics to local department of health vaccination clinics in intervention regions. Control regions experienced a shift in the opposite direction.</p> |    |
| Siebers et al. 1985 (295) | <p>Design: CCT</p> <p>Group allocation: Experimental study with patients randomly allocated to treatment and control groups.</p> <p>Follow-up period: 1 year</p> | <p>Number of patients: 243*</p> <p><u>Group 1</u><br/>Number of patients: 163*<br/>Age and sex distribution not reported.</p> <p><u>Control group</u><br/>Number of patients: 80*<br/>Age and sex distribution not reported</p> <p><u>Eligibility criteria:</u><br/>Patients aged 65 years or older. Patients with missing charts, recorded refusal of vaccination,</p> | <p>Number of sites: 1 academic general internal medicine clinic</p> <p>Site affiliation: University</p> <p>Number of practices or physicians: Not reported</p> <p>Location: United States (Wisconsin)</p> | <p><u>Patient reminder letters vs usual care</u></p> <p>Intervention aim: Improve vaccination rates</p> <p>QI agent: Medical clinic</p> <p><u>Group 1</u></p> <p>Patient education / reminders: Each patient received a letter encouraging pneumococcal vaccination.</p> <p>Clinician education: A didactic seminar on the pneumococcal vaccine was presented to clinic staff.</p>                                                                                                                                                                                                                                                                                                                                                                                                                                                                                                                                                                                            | <p><u>Influenza</u><br/>Not targeted.</p> <p><u>Pneumococcal</u><br/>Proportion of eligible patients receiving vaccination</p> <p>Odds ratio of receiving vaccination between treatment and control groups</p> | <p><u>Influenza</u><br/>Not targeted.</p> <p><u>Pneumococcal</u><br/>Follow-up<br/>Group 1: 20/72 (28%)<br/>Control: 3/39 (8%)</p> <p>Follow-up<br/>OR = 4.62<br/>P &lt; 0.05</p>                                                                                | <p>Sending letters to patients produces significant improvement in the pneumococcal vaccination rate.</p>                                                                                                                                                                                                                        | 19 |

Online Supplementary Data

http://www.annfammed.org/content/10/6/538/DC1

|                               |                                                                                                                                                                                       |                                                                                                                                                                                                                                                                                                                                                                                                                                                                                                                                                                           |                                                                                                                                                                                                                                                                                                                                                                                                                                                                                                                                                                                                                                                           |                                                                                                                                                                                                                                                                                                                                                                                                                                                                                                                                                                                                                                                                                                                                                                                                                                                                                                                                                                                                                                                                                             |                                                                                                                                                |                                                                                                                                                                                                                                                                                                                                                                                                                                                                                                                                                                                                                                                              |                                                                                                                                                                                                                                                                                                                                                                     |    |
|-------------------------------|---------------------------------------------------------------------------------------------------------------------------------------------------------------------------------------|---------------------------------------------------------------------------------------------------------------------------------------------------------------------------------------------------------------------------------------------------------------------------------------------------------------------------------------------------------------------------------------------------------------------------------------------------------------------------------------------------------------------------------------------------------------------------|-----------------------------------------------------------------------------------------------------------------------------------------------------------------------------------------------------------------------------------------------------------------------------------------------------------------------------------------------------------------------------------------------------------------------------------------------------------------------------------------------------------------------------------------------------------------------------------------------------------------------------------------------------------|---------------------------------------------------------------------------------------------------------------------------------------------------------------------------------------------------------------------------------------------------------------------------------------------------------------------------------------------------------------------------------------------------------------------------------------------------------------------------------------------------------------------------------------------------------------------------------------------------------------------------------------------------------------------------------------------------------------------------------------------------------------------------------------------------------------------------------------------------------------------------------------------------------------------------------------------------------------------------------------------------------------------------------------------------------------------------------------------|------------------------------------------------------------------------------------------------------------------------------------------------|--------------------------------------------------------------------------------------------------------------------------------------------------------------------------------------------------------------------------------------------------------------------------------------------------------------------------------------------------------------------------------------------------------------------------------------------------------------------------------------------------------------------------------------------------------------------------------------------------------------------------------------------------------------|---------------------------------------------------------------------------------------------------------------------------------------------------------------------------------------------------------------------------------------------------------------------------------------------------------------------------------------------------------------------|----|
|                               |                                                                                                                                                                                       | <p>or contraindications to vaccination were excluded.</p> <p>* Sample at randomization included patients with previous pneumococcal vaccinations. Only the subgroup of patients without previous vaccination was analyzed.</p>                                                                                                                                                                                                                                                                                                                                            |                                                                                                                                                                                                                                                                                                                                                                                                                                                                                                                                                                                                                                                           | <p><u>Control group</u></p> <p>Usual care.</p>                                                                                                                                                                                                                                                                                                                                                                                                                                                                                                                                                                                                                                                                                                                                                                                                                                                                                                                                                                                                                                              |                                                                                                                                                |                                                                                                                                                                                                                                                                                                                                                                                                                                                                                                                                                                                                                                                              |                                                                                                                                                                                                                                                                                                                                                                     |    |
| Siriwardena et al. 2002 (296) | <p>Design: Cluster RCT</p> <p>Group allocation: Experimental study with random allocation of general practices to treatment and control groups.</p> <p>Follow-up period: 6 months</p> | <p>Number of patients: Total number of patients not reported (6207 patients with cardiovascular disease, 4327 patients with diabetes, 169 patients with splenectomy, and 27580 patients aged 65 years or older; Categories may not be mutually exclusive)</p> <p><u>Group 1</u><br/>Age (&gt;65): 16.1%<br/>Female/male: Not reported.</p> <p><u>Control group</u><br/>Age (&gt;65): 15.9%<br/>Female/male: Not reported.</p> <p><u>Eligibility criteria:</u><br/>Patients aged 65 years or older, or patients with diabetes, cardiovascular disease, or splenectomy.</p> | <p>Site description: General practices involved in participating practice networks</p> <p>Site affiliation: Private practices</p> <p>Number of sites: 2 (1 Primary Care Trust and 1 Collaborative Research Network)</p> <p>Number of practices or physicians: 30*</p> <p>Location: United Kingdom (West Lincolnshire and Trent)</p> <p>* GP practices were allocated to treatment (15 practices) and control (15 practices) groups. Practice-level covariates provided. Significant differences were detected in number of dispensing practices; differences in number of partners and list size seem apparent, despite statistical non-significance.</p> | <p><u>Practice care team education outreach visit with discussion of barriers and solutions vs usual care with baseline performance feedback</u></p> <p>Intervention aim: Improve vaccination rates<br/>QI agent: Medical clinics</p> <p><u>Group 1</u></p> <p>CQI or similar: Practice care teams received education and feedback of practice vaccination rates to the practice team, followed by a discussion about current practice policy and potential solutions.</p> <p>Clinician education: A GP provided evidence-based information, framed around a dialogue about perceived barriers to vaccination within the organization, to the practice-care team.</p> <p>Patient education / reminders: Poster campaigns, waiting room brochures, and reminder/recall were implemented by some practices.</p> <p>Clinician reminders: Vaccination prompts and chart templates were implemented by some practices.</p> <p>Audit and feedback: All study providers received baseline information about their vaccination rates after the educational session.</p> <p><u>Control group</u></p> | <p><u>Influenza</u><br/>Proportion of eligible patients receiving vaccination</p> <p>Odds ratio of receiving vaccination between treatment</p> | <p><u>Influenza</u><br/>Baseline<br/>Patents aged &gt;= 65<br/>Group 1: 48.6%<br/>Control: 44.7%</p> <p>Diabetic patients<br/>Group 1: 58.9%<br/>Control: 58.2%</p> <p>Cardiovascular disease patients<br/>Group 1: 58.0%<br/>Control: 59.4%</p> <p>Splenectomy patients<br/>Group 1: 64.5%<br/>Control: 55.1%</p> <p>Follow-up<br/>Patents aged &gt;= 65<br/>Group 1: 69.3%<br/>Control: 70.1%</p> <p>Diabetic patients<br/>Group 1: 74.4%<br/>Control: 70.2%</p> <p>Cardiovascular disease patients<br/>Group 1: 76.1%<br/>Control: 72.5%</p> <p>Splenectomy patients<br/>Group 1: 80.6%<br/>Control: 58.0%</p> <p>Follow-up<br/>Patents aged &gt;= 65</p> | <p>An educational outreach to primary care teams, addressing areas relevant to practice and using audit, feedback, and discussion of barriers to change and how to overcome these, improved pneumococcal vaccination rates in coronary and diabetic patients in this trial.</p> <p>The study did not demonstrate an improvement in influenza vaccination rates.</p> | 26 |

Online Supplementary Data

http://www.annfammed.org/content/10/6/538/DC1

|  |  |  |  |                               |                                                                              |                                                                                          |  |  |
|--|--|--|--|-------------------------------|------------------------------------------------------------------------------|------------------------------------------------------------------------------------------|--|--|
|  |  |  |  | Audit and feedback, as above. | and control groups*                                                          | OR = 0.99, P = 0.42                                                                      |  |  |
|  |  |  |  |                               |                                                                              | Diabetic patients<br>OR = 1.07, P = 0.08                                                 |  |  |
|  |  |  |  |                               |                                                                              | Cardiovascular disease patients<br>OR = 1.06, P = 0.09                                   |  |  |
|  |  |  |  |                               |                                                                              | Splenectomy patients<br>OR = 1.22, P = 0.38                                              |  |  |
|  |  |  |  |                               | <u>Pneumococcal</u><br>Proportion of eligible patients receiving vaccination | <u>Pneumococcal</u><br>Baseline<br>Diabetic patients<br>Group 1: 43.3%<br>Control: 40.6% |  |  |
|  |  |  |  |                               |                                                                              | Cardiovascular disease patients<br>Treatment: 30.6%<br>Control: 33.2%                    |  |  |
|  |  |  |  |                               |                                                                              | Splenectomy patients<br>Treatment: 79.0%<br>Control: 86.0%                               |  |  |
|  |  |  |  |                               |                                                                              | Follow-up<br>Diabetic patients<br>Treatment: 58.8%<br>Control: 47.4%                     |  |  |
|  |  |  |  |                               |                                                                              | Cardiovascular disease patients<br>Treatment: 44.8%<br>Control: 39.7%                    |  |  |
|  |  |  |  |                               |                                                                              | Splenectomy patients<br>Treatment: 85.5%<br>Control: 90.7%                               |  |  |
|  |  |  |  |                               | Odds ratio of receiving vaccination between treatment and control groups*    | Follow-up<br>Diabetic patients<br>OR = 1.18, P<0.001                                     |  |  |
|  |  |  |  |                               |                                                                              | Cardiovascular disease patients<br>OR = 1.23, P<0.001                                    |  |  |
|  |  |  |  |                               | * Odds ratios adjusted for                                                   |                                                                                          |  |  |

Online Supplementary Data

http://www.annfammed.org/content/10/6/538/DC1

|                           |                                                                                                                                                                                                |                                                                                                                                                                                                                                                                                                                                                                                                                                                                                                                                                                                                                                            |                                                                                                                                                                                                                                                                                                             |                                                                                                                                                                                                                                                                                                                                                                                                                                                                                                                                                                                                                                                              |                                                                                                                                                                                                                |                                                                                                                                                                                                                                                                                                                                                                                                                                                                                    |                                                                                                                                                                                                                                                                                                                                                                                                                                                                                                                                                           |    |
|---------------------------|------------------------------------------------------------------------------------------------------------------------------------------------------------------------------------------------|--------------------------------------------------------------------------------------------------------------------------------------------------------------------------------------------------------------------------------------------------------------------------------------------------------------------------------------------------------------------------------------------------------------------------------------------------------------------------------------------------------------------------------------------------------------------------------------------------------------------------------------------|-------------------------------------------------------------------------------------------------------------------------------------------------------------------------------------------------------------------------------------------------------------------------------------------------------------|--------------------------------------------------------------------------------------------------------------------------------------------------------------------------------------------------------------------------------------------------------------------------------------------------------------------------------------------------------------------------------------------------------------------------------------------------------------------------------------------------------------------------------------------------------------------------------------------------------------------------------------------------------------|----------------------------------------------------------------------------------------------------------------------------------------------------------------------------------------------------------------|------------------------------------------------------------------------------------------------------------------------------------------------------------------------------------------------------------------------------------------------------------------------------------------------------------------------------------------------------------------------------------------------------------------------------------------------------------------------------------|-----------------------------------------------------------------------------------------------------------------------------------------------------------------------------------------------------------------------------------------------------------------------------------------------------------------------------------------------------------------------------------------------------------------------------------------------------------------------------------------------------------------------------------------------------------|----|
|                           |                                                                                                                                                                                                |                                                                                                                                                                                                                                                                                                                                                                                                                                                                                                                                                                                                                                            |                                                                                                                                                                                                                                                                                                             |                                                                                                                                                                                                                                                                                                                                                                                                                                                                                                                                                                                                                                                              | baseline vaccination status and clustering within practices.                                                                                                                                                   | Splenectomy patients<br>OR = 0.96, P=0.83                                                                                                                                                                                                                                                                                                                                                                                                                                          |                                                                                                                                                                                                                                                                                                                                                                                                                                                                                                                                                           |    |
| Smith et al. 1999 (297)   | <p>Design:<br/>RCT</p> <p>Group allocation:<br/>Experimental study with patients randomly allocated to treatment or control groups.</p> <p>Follow-up period:<br/>3 months</p>                  | <p>Number of patients: 9011</p> <p><u>Group 1</u><br/>Number of patients: 4508*<br/>Female/male: 2759/2749<br/>Age (mean(sd)): 75.5 (sd not reported)</p> <p><u>Control group</u><br/>Number of patients: 4503*<br/>Female/male: 2787/1716<br/>Age (mean(sd)): 75.4 (sd not reported)</p> <p><u>Eligibility criteria:</u><br/>Medicare beneficiaries aged 65 years or older, without evidence of having died, had billed a Medicare service in the previous year, and were not members of an HMO.</p> <p><u>Exclusion:</u><br/><br/>* Outcomes survey returned by 3454 and 3487 intervention and control group patients, respectively.</p> | <p>Number of sites: 1 medical care foundation working with the HCFA conducted the trial was conducted in ten Indiana counties.</p> <p>Site affiliation:<br/>Government, Medicare, non-profit foundation</p> <p>Number of practices or physicians: Not reported</p> <p>Location: United States (Indiana)</p> | <p><u>Mailed patient educational letters vs usual care</u></p> <p>Intervention aim: Improve vaccination rates<br/>QI agent: Non-profit foundation working with state Medicare authorities</p> <p><u>Group 1</u><br/><br/>Patient education / reminders: Patients were sent a reminder letter adapted from the Health Belief Model. The letter also contained signatures from the principal investigator, the state health commissioner, and the medical director of Medicare for Indiana. An additional page of information about influenza and vaccination summarized from CDC materials was appended.</p> <p><u>Control group</u><br/><br/>Usual care.</p> | <p><u>Influenza</u><br/>Proportion of eligible patients receiving vaccination</p> <p>Odds ratio of receiving vaccination between treatment and control groups</p> <p><u>Pneumococcal</u><br/>Not targeted.</p> | <p><u>Influenza</u><br/>Follow-up *<br/>Group 1: 67.4%<br/>Control: 64.2%</p> <p>Follow-up<br/>OR = 1.22**<br/>95% CI: [1.09, 1.37]</p> <p>OR = 1.20***<br/>95% CI: [1.06, 1.35]</p> <p><u>Pneumococcal</u><br/>Not targeted.</p> <p>* Approximately 25% patients did not respond to the outcomes survey. Outcomes for non-responders were imputed from outcomes from further telephone follow-up of randomly selected non-responders.</p> <p>** , *** Notes: See next column.</p> | <p>Both intervention and control groups achieved high immunization rates (&gt;60%). Mailed reminders increased influenza immunization rates significantly.</p> <p>Those with heart disease and lung disease obtain immunization at higher rates than others in the &gt;65 age group.</p> <p>** Based on Medicare claims data (9011 patients), adjusting for age, county density, gender, and age-gender interaction.<br/>*** Based on survey data (6941 patients), adjusted for age, gender, comorbidities, age-gender interaction, density of county</p> | 22 |
| Solberg et al. 2000 (298) | <p>Design:<br/>Cluster RCT</p> <p>Group allocation:<br/>Experimental study with medical clinics randomly allocated to treatment and control groups.</p> <p>Follow-up period:<br/>20 months</p> | <p>Number of patients: 7997 (6830 available for analysis, enumerated below.)</p> <p><u>Group 1</u><br/>Number of patients: 3379<br/>Female/male: 2311/1068<br/>Age (mean(sd)): 48.4 (1.3)</p> <p><u>Control group</u><br/>Number of patients: 3451<br/>Female/male: 2371/1080<br/>Age (mean(sd)): 48.6 (2.3)</p> <p><u>Eligibility criteria:</u><br/>Clinics were required to be part of a medical group contracting with one of the study HMOs.</p>                                                                                                                                                                                       | <p>Number of sites: 2 large HMOs</p> <p>Site affiliation: Private MCOs, private practices</p> <p>Number of practices or physicians: 44 clinics*</p> <p>Location: United States (Minnesota)</p> <p>* Clinics were randomly allocated to treatment (22 clinics, 6.7 +/- 4.2 adult primary care physicians</p> | <p><u>Continuous quality improvement facilitation vs usual care</u></p> <p>Intervention aim: Improve preventive care<br/>QI agent: HMO</p> <p><u>Group 1</u><br/><br/>Continuous Quality Improvement (or similar): Each clinic's team leader/facilitator was provided with an initial 6 hour conference overview of CQI methods and systems, followed by six workshops over six months. Clinic leaders were taught a seven-step cycle – identify the problem, collect data, analyze the data to understand root</p>                                                                                                                                          | <p><u>Influenza</u><br/>Proportion of eligible patients receiving vaccination</p> <p><u>Pneumococcal</u><br/>Proportion of eligible patients receiving vaccination</p> <p>Change in proportion of eligible</p> | <p><u>Influenza</u><br/>Baseline<br/>Group 1: 62.1%<br/>Control: 62.5%</p> <p>Follow-up<br/>Results not reported.</p> <p><u>Pneumococcal</u><br/>Baseline<br/>Group 1: 30.3%<br/>Control: 28.6%</p> <p>Follow-up<br/>Group 1: 48%<br/>Control: 29%</p> <p>Follow-up*</p>                                                                                                                                                                                                           | <p>Pneumococcal vaccination rates improved more in CQI than in control clinics. However, the intervention was generally considered a failure, since improvements were not different between groups for the other preventive health services targeted.</p> <p>This may have been due to ceiling effects or a-typicality of clinics. More likely, the CQI approach may have been ineffective. Process evaluations showed that teams did not complete or repeat the improvement cycle, were slow to</p>                                                      | 23 |

Online Supplementary Data

http://www.annfammed.org/content/10/6/538/DC1

|                             |                                                                                                                                                                                |                                                                                                                                                                                                                                                                                                                                                              |                                                                                                                                                                                                                  |                                                                                                                                                                                                                                                                                                                                                                                                                               |                                                                                                                                                                                                                                               |                                                                                                                                                                                  |                                                                                                                                                                                                                                                                                                                                                                                      |    |
|-----------------------------|--------------------------------------------------------------------------------------------------------------------------------------------------------------------------------|--------------------------------------------------------------------------------------------------------------------------------------------------------------------------------------------------------------------------------------------------------------------------------------------------------------------------------------------------------------|------------------------------------------------------------------------------------------------------------------------------------------------------------------------------------------------------------------|-------------------------------------------------------------------------------------------------------------------------------------------------------------------------------------------------------------------------------------------------------------------------------------------------------------------------------------------------------------------------------------------------------------------------------|-----------------------------------------------------------------------------------------------------------------------------------------------------------------------------------------------------------------------------------------------|----------------------------------------------------------------------------------------------------------------------------------------------------------------------------------|--------------------------------------------------------------------------------------------------------------------------------------------------------------------------------------------------------------------------------------------------------------------------------------------------------------------------------------------------------------------------------------|----|
|                             |                                                                                                                                                                                | Patients were randomly selected from all those visiting participating clinics during the baseline and follow-up data collection periods. Patients > 64 years of age were targeted for influenza/pneumococcal vaccine.                                                                                                                                        | each (mean +/- sd) and control (22 clinics, 8.7 +/- 6.1 adult primary care physicians each) groups.                                                                                                              | problems, develop solutions, generate recommendations, implement recommendations, and evaluate the process. Additionally, teams were provided with evidence for a systems approach to improving preventive services. Systems that teams could chose from included clinician reminders and team change – however the particular QI tactics deployed were not reported.<br><br><u>Control group</u><br>Usual care.              | patients receiving vaccination                                                                                                                                                                                                                | Group 1: +17.2%<br>Control: +0.3%<br>P = 0.003<br><br>* Adjusted for clustering.                                                                                                 | implement changes, and usually implemented incomplete changes.                                                                                                                                                                                                                                                                                                                       |    |
| Spaulding et al. 1991 (299) | Design:<br>RCT<br><br>Group allocation:<br>Experimental study with patients allocated randomly to treatment or control groups.<br><br>Follow-up period:<br>6 months            | Number of patients: 1068<br><br><u>Group 1</u><br>Number of patients: 519<br>Female/male: 257/262<br>Age (>64): 116 (22%)<br><br><u>Control group</u><br>Number of patients: 549<br>Female/male: 238/311<br>Age (>64): 108 (20%)<br><br><u>Eligibility criteria:</u><br><br>Patients aged 65 or older, or patients with chronic disease, army personnel.     | Number of sites: 1 department of family practice, at an army medical center<br><br>Site affiliation: Military<br><br>Number of practices or physicians: Not reported<br><br>Location: United States (Washington) | <u>Patient postcard reminders vs usual care</u><br><br>Intervention aim: Improve vaccination rates<br>QI agent: Department of Family Practice<br><br><u>Group 1</u><br><br>Patient education / reminders: Patients were mailed a reminder postcard advising them that their physician had determined that they were at high risk of complications should they catch the “flu”.<br><br><u>Control group</u><br><br>Usual care. | <u>Influenza</u><br>Proportion of eligible patients receiving vaccination<br><br>Odds ratio of receiving vaccination between treatment and control groups<br><br><u>Pneumococcal</u><br>Proportion of eligible patients receiving vaccination | <u>Influenza</u><br>Follow-up<br>Group 1: 131/519 (25%)<br>Control: 50/549 (9.1%)<br><br>Follow-up<br>OR = 3.37<br>P < 0.001<br><br><u>Pneumococcal</u><br>Not targeted.         | The use of a reminder postcard was associated with higher influenza immunization rates.<br><br>Vaccination rates were generally low. Enlisted (vs officer) rank and an age of 40 years or less were risk factors for not getting vaccinated.                                                                                                                                         | 23 |
| Tang et al. 1999 (300)      | Design:<br>PCS<br><br>Group allocation:<br>Observational study with physicians allocated to treatment or control groups by personal choice.<br><br>Follow-up period:<br>1 year | Number of patients: 347 to 629 from year to year. Age and gender distribution not reported.<br><br><u>Group 1</u><br>Number of patients:<br>182 – 314 from year to year.<br><br><u>Control group</u><br>Number of patients: 165 – 315 from year to year.<br><br><u>Eligibility criteria:</u><br>Patients aged 65 years of over with a non-acute visit to the | Number of sites: 1 large university internal medicine clinic<br><br>Site affiliation: University<br><br>Number of practices or physicians: 23 physicians*<br><br>Location: United States (Illinois)              | <u>Clinician reminders and EMR vs usual care with paper based records</u><br><br>Intervention aim: Improve vaccination rates<br>QI agent: General medicine clinic<br><br><u>Group 1</u><br><br>Other: EMR implemented between the 1996-1997 reporting periods<br><br>Clinician reminders: A pop-up window reminding physicians to provide influenza vaccinations appears when                                                 | <u>Influenza</u><br>Proportion of eligible visits resolved by guideline-concordant physician action                                                                                                                                           | <u>Influenza</u><br>1995<br>Group 1: 40%<br>Control: 28%<br><br>1996<br>Group 1: 39%<br>Control: 29%<br><br>1997<br>Group 1: 61%*<br>Control: 37%*<br><br>1998<br>Group 1: 68%** | Both the introduction of an EMR and the subsequent introduction of an EMR-based clinician reminder system were associated with increases in physician compliance with influenza vaccination recommendations.<br><br>Immunization rates in a group of physicians using paper based patient records with no reminder system fluctuated, but ultimately was not changed at study’s end. | 18 |

Online Supplementary Data

http://www.annfammed.org/content/10/6/538/DC1

|                                  |                                                                                                                                                                                                   |                                                                                                                                                                                                                                                                                                                                                                                                                                                                                                     |                                                                                                                                                                                                                                                                   |                                                                                                                                                                                                                                                                                                                                                                                                                                                                           |                                                                                                                                                                                                                                                                                                                                         |                                                                                                                                                                                                                                                               |                                                                                                                                                                                                                                                                                                                                                                                           |    |
|----------------------------------|---------------------------------------------------------------------------------------------------------------------------------------------------------------------------------------------------|-----------------------------------------------------------------------------------------------------------------------------------------------------------------------------------------------------------------------------------------------------------------------------------------------------------------------------------------------------------------------------------------------------------------------------------------------------------------------------------------------------|-------------------------------------------------------------------------------------------------------------------------------------------------------------------------------------------------------------------------------------------------------------------|---------------------------------------------------------------------------------------------------------------------------------------------------------------------------------------------------------------------------------------------------------------------------------------------------------------------------------------------------------------------------------------------------------------------------------------------------------------------------|-----------------------------------------------------------------------------------------------------------------------------------------------------------------------------------------------------------------------------------------------------------------------------------------------------------------------------------------|---------------------------------------------------------------------------------------------------------------------------------------------------------------------------------------------------------------------------------------------------------------|-------------------------------------------------------------------------------------------------------------------------------------------------------------------------------------------------------------------------------------------------------------------------------------------------------------------------------------------------------------------------------------------|----|
|                                  |                                                                                                                                                                                                   | study clinic during influenza season. Patients vaccinated in September, before influenza season began, were excluded.                                                                                                                                                                                                                                                                                                                                                                               | * Physicians self-allocated to treatment (13 physicians) or control groups (10 physicians).                                                                                                                                                                       | each eligible patient's EMR is opened. Reminders were implemented between the 1997-1998 reporting period.<br><br><u>Control group</u><br><br>Usual care with paper based records                                                                                                                                                                                                                                                                                          | <u>Pneumococcal</u><br>Not targeted.                                                                                                                                                                                                                                                                                                    | Control: 31%***<br><br><u>Pneumococcal</u><br>Not targeted.<br><br>* , ** , and *** notes: See next column. All findings unadjusted for potential unit of analysis effects.                                                                                   | * Significant increase compared to 1996 results, p=0.001 for the intervention group, p = 0.02 for the control group.<br>** Significant increase compared to 1997 results, p=0.02 for the intervention group.<br>*** Non-significant compared with 1995 control group outcome, p=0.18                                                                                                      |    |
| Tape et al. 1993 (301)           | Design:<br>Cluster CBA<br><br>Group allocation:<br>Experimental study with block-alternating allocation of resident physicians to treatment or control groups.<br><br>Follow-up period:<br>1 year | Number of patients: 384<br><br><u>Group 1</u><br>Number of patients: 212<br><br><u>Control group</u><br>Number of patients: 172<br><br><u>Eligibility criteria:</u><br>Practice patients eligible for influenza or pneumococcal vaccination – aged 65 years and older or history of diabetes, chronic respiratory, or heart disease. Patients were also eligible for pneumococcal vaccination if they were immuno-compromised, and were not eligible if there was a record of previous vaccination. | Number of sites: 1 academic internal medicine outpatient clinic<br><br>Site affiliation: University<br><br>Number of practices or physicians: 4 attending physicians-practices supervising numerous resident physicians<br><br>Location: United States (Nebraska) | <u>Computer-generated clinician reminders vs generic reminder sheets</u><br><br>Intervention aim: Improve preventive care<br>QI agent: Physician practices<br><br><u>Group 1</u><br><br>Clinician reminders: Patient-specific clinician reminder page automatically generated from the EMR provided to physicians at each visit.<br><br><u>Control group</u><br><br>Clinician reminders: A generic reminder sheet was placed in each patient chart. No EMR was available. | <u>Influenza</u><br>Proportion of eligible patients receiving vaccination<br><br>Odds ratio of receiving vaccination between treatment and control groups<br><br><u>Pneumococcal</u><br>Proportion of eligible patients receiving vaccination at 1 year<br><br>Odds ratio of receiving vaccination between treatment and control groups | <u>Influenza</u><br>Follow-up<br>Group 1: 62/212 (29%)<br>Control: 37/172 (22%)<br><br>Follow-up<br>OR = 1.51<br>P = 0.05<br><br><u>Pneumococcal</u><br>Follow-up<br>Group 1: 35/310 (11%)<br>Control: 13/274 (5%)<br><br>Follow-up<br>OR = 2.56<br>P = 0.003 | Physicians using an EMR including preventive care reminders were more likely to recommend preventive care measures. However, compliance with preventive recommendations was generally low.<br><br>The attending physician and level of training of the resident physician affected preventive care.                                                                                       | 20 |
| Terrell-Perica et al. 2001 (302) | Design:<br>CCT<br><br>Group allocation:<br>Experimental study with patients randomly allocated to treatment and control groups.<br><br>Follow-up period:<br>3 months                              | Number of patients: 6528<br>Female/male: 2872/3656<br>Age (median):65<br>Group-specific age and gender distributions not reported.<br><br><u>Group 1</u><br>Number of patients: 2213<br><br><u>Group 2</u><br>Number of patients: 2171<br><br><u>Control group</u><br>Number of patients: 2144<br><br><u>Eligibility criteria:</u>                                                                                                                                                                  | Number of sites: State-wide intervention delivered by the state health department.<br><br>Site affiliation:<br>Government / Medicare<br><br>Number of practices or physicians: Not reported<br><br>Location: United States (Hawaii)                               | <u>Influenza vaccination reminder letters vs reminder letters for pneumococcal as well as influenza vaccinations vs usual care</u><br><br>Intervention aim: Improve vaccination rates<br>QI agent: State Health Department<br><br><u>Group 1 – Influenza reminder</u><br><br>Patient education / reminders: One-page influenza vaccination reminder letters were written on State of Hawaii Department of Health letterhead and signed by the state epidemiologist.       | <u>Influenza</u><br>Proportion of eligible patients receiving vaccination<br><br>Risk difference between treatment and control groups                                                                                                                                                                                                   | <u>Influenza</u><br>Follow-up<br>Group 1: 438/2213 (20%)<br>Group 2: 454/2171 (21%)<br>Control: 367/2144 (17%)<br><br>Overall test of significance<br>P = 0.03<br><br>Follow-up<br>Group 1<br>Diff: 2.7%<br>P = 0.023<br><br>Group 2<br>Diff: 3.8%            | Mailing reminder letters for influenza or influenza and pneumococcal vaccination to new no-managed-care Medicare beneficiaries residing in Hawaii had a modest, but significant impact on improving influenza and pneumococcal vaccination levels.<br><br>The addition of the pneumococcal reminder did not appear to detract from the influenza message in the combined reminder letter. | 23 |

|                          |                                                                                                                                                    |                                                                                                                                                                                                                                                    |                                                                                                                                                                                                                     |                                                                                                                                                                                                                                                                                                                                                                                                                                                                                                                                                                                                                                                                                                                                                                                                                                                                                       |                                                                                                                                                                                                                                                                                                  |                                                                                                                                                                                                                                                                                                                                                                                                                                                                                                                                               |                                                                                                                                                                                                                                                                                                                                 |    |
|--------------------------|----------------------------------------------------------------------------------------------------------------------------------------------------|----------------------------------------------------------------------------------------------------------------------------------------------------------------------------------------------------------------------------------------------------|---------------------------------------------------------------------------------------------------------------------------------------------------------------------------------------------------------------------|---------------------------------------------------------------------------------------------------------------------------------------------------------------------------------------------------------------------------------------------------------------------------------------------------------------------------------------------------------------------------------------------------------------------------------------------------------------------------------------------------------------------------------------------------------------------------------------------------------------------------------------------------------------------------------------------------------------------------------------------------------------------------------------------------------------------------------------------------------------------------------------|--------------------------------------------------------------------------------------------------------------------------------------------------------------------------------------------------------------------------------------------------------------------------------------------------|-----------------------------------------------------------------------------------------------------------------------------------------------------------------------------------------------------------------------------------------------------------------------------------------------------------------------------------------------------------------------------------------------------------------------------------------------------------------------------------------------------------------------------------------------|---------------------------------------------------------------------------------------------------------------------------------------------------------------------------------------------------------------------------------------------------------------------------------------------------------------------------------|----|
|                          |                                                                                                                                                    | <p>Medicare beneficiaries newly enrolled during an 11 month period of time.</p> <p><u>Exclusions:</u> Receipt of influenza and/or pneumococcal vaccination the year before the intervention.</p>                                                   |                                                                                                                                                                                                                     | <p>Content consisted of simple bullets emphasizing that “Medicare covers FLU shots!” All patients were additionally exposed to routine State of Hawaii Department of Health promotional activities for influenza vaccination, including a mass media campaign.</p> <p>Delivery site change: Immunization clinics were held at pharmacies and retail stores.</p> <p>Clinician education: Pneumococcal education kits produced by the National Institute on Aging were mailed to physicians.</p> <p><u>Group 2 – Influenza and pneumococcal reminder</u></p> <p>Delivery site change, clinician education, and patient education / reminders, as above, except reminder letters also covered pneumococcal vaccinations.</p> <p><u>Control group</u></p> <p>Delivery site change, clinician education, and patient education / reminders, as above, except without reminder letters.</p> | <p>Odds ratio of receiving vaccination between treatment and control groups</p> <p><u>Pneumococcal</u><br/>Proportion of eligible patients receiving vaccination</p> <p>Risk difference between study groups</p> <p>Odds ratio of receiving vaccination between treatment and control groups</p> | <p>P = 0.017</p> <p>Follow-up<br/>Group 1<br/>OR = 1.19<br/>P = 0.02</p> <p>Group 2<br/>OR = 1.28<br/>P = 0.002</p> <p><u>Pneumococcal</u><br/>Follow-up<br/>Group 1: 60/2213 (3%)<br/>Group 2: 146/2171 (7%)<br/>Control: 68/2144 (3.2%)</p> <p>Overall test of significance<br/>P &lt; 0.001</p> <p>Follow-up<br/>Group 2 vs control<br/>Diff: 3.5%<br/>P &lt; 0.001</p> <p>Group 2 vs group 1<br/>Diff: 4.0%<br/>P &lt; 0.001</p> <p>Follow-up<br/>Group 1<br/>OR = 0.85<br/>P &gt; 0.05</p> <p>Group 2<br/>OR = 2.20<br/>P &lt; 0.001</p> |                                                                                                                                                                                                                                                                                                                                 |    |
| Thomas et al. 2003 (303) | <p>Design:<br/>CCT</p> <p>Group allocation:<br/>Experimental study with patients allocated to treatment and control group by sequential order.</p> | <p>Number of patients: 558</p> <p><u>Group 1</u><br/>Number of patients: 189<br/>Female/male: 144/45<br/>Age (mean(sd)): 63.4 (12.7)</p> <p><u>Group 2</u><br/>Number of patients: 187<br/>Female/male: 140/47<br/>Age (mean(sd)): 61.9 (12.7)</p> | <p>Number of sites: 1 Medical clinic of a large inner-city hospital serving a majority black population</p> <p>Site affiliation: University</p> <p>Number of practices or physicians: 17 primary care providers</p> | <p><u>Culturally tailored video modeling patient-physician communication about vaccination and vaccination educational brochure vs culturally tailored video only vs usual care</u></p> <p>Intervention aim: Improve vaccination rates<br/>QI agent: Medical clinic</p> <p><u>Group 1</u></p>                                                                                                                                                                                                                                                                                                                                                                                                                                                                                                                                                                                         | <p><u>Influenza</u><br/>Not targeted.</p> <p><u>Pneumococcal</u><br/>Proportion of eligible patients receiving vaccination</p> <p>Odds ratio of receiving vaccination between treatment</p>                                                                                                      | <p><u>Influenza</u><br/>Not targeted.</p> <p><u>Pneumococcal</u><br/>Follow-up<br/>Group 1: 44/189 (23%)<br/>Group 2: 19/187 (10%)<br/>Control: 12/182 (7%)</p> <p>Follow-up<br/>Group 1</p>                                                                                                                                                                                                                                                                                                                                                  | <p>Exposure to patient education tools represents an effective mechanism for increasing pneumococcal vaccination rates. A brief (&lt;3 minutes), culturally appropriate videotape along with a low-literacy brochure about the pneumococcal vaccine increased vaccination rates more than threefold over the control group.</p> | 23 |



Online Supplementary Data

http://www.annfammed.org/content/10/6/538/DC1

|                           |                                                                                                                                                                                                |                                                                                                                                                                                                                                                                                                                                                                                                                                                                                                                               |                                                                                                                                                                                                                                                                                                                                               |                                                                                                                                                                                                                                                                                                                                                                                                                                                                                                                                                                                                                                                                                              |                                                                                                                                                                                                                                                                              |                                                                                                                                                                                                                                                       |                                                                                                                                                                                                                                                                                                                                                                                                                                                                                                                                                                                                                                                                                                                                                                                    |    |
|---------------------------|------------------------------------------------------------------------------------------------------------------------------------------------------------------------------------------------|-------------------------------------------------------------------------------------------------------------------------------------------------------------------------------------------------------------------------------------------------------------------------------------------------------------------------------------------------------------------------------------------------------------------------------------------------------------------------------------------------------------------------------|-----------------------------------------------------------------------------------------------------------------------------------------------------------------------------------------------------------------------------------------------------------------------------------------------------------------------------------------------|----------------------------------------------------------------------------------------------------------------------------------------------------------------------------------------------------------------------------------------------------------------------------------------------------------------------------------------------------------------------------------------------------------------------------------------------------------------------------------------------------------------------------------------------------------------------------------------------------------------------------------------------------------------------------------------------|------------------------------------------------------------------------------------------------------------------------------------------------------------------------------------------------------------------------------------------------------------------------------|-------------------------------------------------------------------------------------------------------------------------------------------------------------------------------------------------------------------------------------------------------|------------------------------------------------------------------------------------------------------------------------------------------------------------------------------------------------------------------------------------------------------------------------------------------------------------------------------------------------------------------------------------------------------------------------------------------------------------------------------------------------------------------------------------------------------------------------------------------------------------------------------------------------------------------------------------------------------------------------------------------------------------------------------------|----|
|                           | <p>Follow-up period:<br/>Unclear.</p>                                                                                                                                                          | <p><u>Control group</u><br/>Number of patients: 182<br/>Female/male: 119/63<br/>Age (mean(sd)): 63.3 (12.9)</p> <p><u>Eligibility criteria:</u><br/>Patients aged 65 years or older, or patients with heart disease, lung disease, or diabetes. Patients were eligible if they had not been previously vaccinated.</p> <p><u>Exclusions:</u> Deafness; blindness; language barriers; dementia; and walk-in visits, first time visits, and medication refill visits in which patients did not see a primary care provider.</p> | <p>Location: United States (Georgia)</p>                                                                                                                                                                                                                                                                                                      | <p>Patient education / reminders: Patients watched a 3 minute video tape featuring 3 black patients and 1 black physician modeling the desired behavior of a patient and a physician discussing the pneumococcal vaccine. Patients also received a low-literacy brochure providing minimal information about the vaccine, and prompting patients to ask their physicians about the pneumonia shot.</p> <p><u>Group 2</u></p> <p>Patient education / reminders, as above, except without the brochure.</p> <p><u>Control</u></p> <p>Usual care.</p>                                                                                                                                           | <p>and control groups</p>                                                                                                                                                                                                                                                    | <p>OR = 4.30<br/>P &lt; 0.001</p> <p>Group 2<br/>OR = 1.60<br/>P = 0.26</p>                                                                                                                                                                           | <p>However, while exposure to the videotape alone resulted in a significant increase in patient-physician discussion about vaccination, no significant increase in vaccination rates was observed. The videotape intervention did not appear to be effective on its own.</p>                                                                                                                                                                                                                                                                                                                                                                                                                                                                                                       |    |
| Tierney et al. 1986 (304) | <p>Design:<br/>Cluster RCT</p> <p>Group allocation:<br/>Experimental study with randomized allocation of physicians to treatment and control groups.</p> <p>Follow-up period:<br/>7 months</p> | <p>Number of patients: 6045</p> <p><u>Group 3</u><br/>Number of patients: 1487</p> <p><u>Group 2</u><br/>Number of patients: 1606</p> <p><u>Group 1</u><br/>Number of patients: 1451</p> <p><u>Control group</u><br/>Number of patients: 1501</p> <p><u>Eligibility criteria:</u><br/>Patients attending an urban general medicine clinic. Pneumococcal vaccination was indicated for patients with chronic disease or alcohol abuse.</p>                                                                                     | <p>Number of sites: 1 general medicine clinic at an urban teaching hospital</p> <p>Site affiliation: University</p> <p>Number of practices or physicians: 135*</p> <p>Location: United States (Indiana)</p> <p>* Physicians were allocated to groups 1 (33 physicians), 2 (36 physicians), 3 (31 physicians), and control (35 physicians)</p> | <p><u>Clinician reminders and delayed feedback vs clinician reminders vs delayed feedback vs usual care</u></p> <p>Intervention aim: Improve preventive care<br/>QI agent: Medical clinic</p> <p><u>Group 3</u></p> <p>Audit and feedback: Each month, the computer searched the EMRs of patients who had recently visited a study physician, generated reports for those who had an indication for, but did not receive, one or more preventive care actions. A report was generated requiring a physician response for each patient.</p> <p>Clinician reminders: Immediate preventive care reminders were given to physicians at the time of patient encounters.</p> <p><u>Group 2</u></p> | <p><u>Influenza</u><br/>Not targeted.</p> <p><u>Pneumococcal</u><br/>Proportion of eligible patients receiving vaccination, taken as a continuous performances score for each physician.</p> <p>Odds ratio of receiving vaccination between treatment and control groups</p> | <p><u>Influenza</u><br/>Not targeted.</p> <p><u>Pneumococcal</u><br/>Follow-up<br/>Group 3: 32%<br/>Group 2: 35%<br/>Group 1: 19%<br/>Control: 5%</p> <p>Follow-up<br/>Group 3<br/>OR = 8.94<br/>P &lt; 0.001<br/>No other test results reported.</p> | <p>Both immediate (clinician reminders) and delayed (audit and feedback) information identifying patients eligible for preventive care protocols can improve physician compliance with preventive care recommendations.</p> <p>Immediate reminders presented at the time of patient visits have a greater effect than delayed performance reports.</p> <p>No additive effect between the two interventions was observed. This may be because audit and feedback drilled down to the level of individual patients, and physicians often chose to generate a reminder for the next patient visit as a result of audit and feedback; or because audit and feedback may have occurred after physicians had already reviewed a patient reminder to provide preventive care. In both</p> | 19 |

Online Supplementary Data

http://www.annfammed.org/content/10/6/538/DC1

|                           |                                                                                                                                                                             |                                                                                                                                                                                                                                                                                                                                                                                                                                                                                                                                                                                                                                                                                                                                                                                                                                                      |                                                                                                                                                                                                                                                                                                                                                                                                                                                                                                                                                                    |                                                                                                                                                                                                                                                                                                                                                                                                                                                                                                                                                                                                                                                                                                                                                                                                                                                                                                                                                                                                                                                          |                                                                                                                                                                                                                                                                                                                                                               |                                                                                                                                                                                                                                                                                                                                                   |                                                                                                                                                                                                                                                                                                                                                                                                                                                             |    |
|---------------------------|-----------------------------------------------------------------------------------------------------------------------------------------------------------------------------|------------------------------------------------------------------------------------------------------------------------------------------------------------------------------------------------------------------------------------------------------------------------------------------------------------------------------------------------------------------------------------------------------------------------------------------------------------------------------------------------------------------------------------------------------------------------------------------------------------------------------------------------------------------------------------------------------------------------------------------------------------------------------------------------------------------------------------------------------|--------------------------------------------------------------------------------------------------------------------------------------------------------------------------------------------------------------------------------------------------------------------------------------------------------------------------------------------------------------------------------------------------------------------------------------------------------------------------------------------------------------------------------------------------------------------|----------------------------------------------------------------------------------------------------------------------------------------------------------------------------------------------------------------------------------------------------------------------------------------------------------------------------------------------------------------------------------------------------------------------------------------------------------------------------------------------------------------------------------------------------------------------------------------------------------------------------------------------------------------------------------------------------------------------------------------------------------------------------------------------------------------------------------------------------------------------------------------------------------------------------------------------------------------------------------------------------------------------------------------------------------|---------------------------------------------------------------------------------------------------------------------------------------------------------------------------------------------------------------------------------------------------------------------------------------------------------------------------------------------------------------|---------------------------------------------------------------------------------------------------------------------------------------------------------------------------------------------------------------------------------------------------------------------------------------------------------------------------------------------------|-------------------------------------------------------------------------------------------------------------------------------------------------------------------------------------------------------------------------------------------------------------------------------------------------------------------------------------------------------------------------------------------------------------------------------------------------------------|----|
|                           |                                                                                                                                                                             |                                                                                                                                                                                                                                                                                                                                                                                                                                                                                                                                                                                                                                                                                                                                                                                                                                                      |                                                                                                                                                                                                                                                                                                                                                                                                                                                                                                                                                                    | <p>Clinician reminders, as above.</p> <p><u>Group 1</u></p> <p>Audit and feedback, as above.</p> <p><u>Control group</u></p> <p>Usual care.</p>                                                                                                                                                                                                                                                                                                                                                                                                                                                                                                                                                                                                                                                                                                                                                                                                                                                                                                          |                                                                                                                                                                                                                                                                                                                                                               |                                                                                                                                                                                                                                                                                                                                                   | cases, audit and feedback may not have generated new information.                                                                                                                                                                                                                                                                                                                                                                                           |    |
| Tierney et al. 2003 (305) | <p>Design: Cluster-RCT</p> <p>Group allocation: Half-day physician clinic "sessions" were randomly allocated to intervention groups.</p> <p>Follow-up period: 12 months</p> | <p>Number of patients: 870</p> <p><u>Group 1</u><br/>Number of patients: 197<br/>Female/male: 61%/39%<br/>Age (mean(sd)): 61(12)</p> <p><u>Group 2</u><br/>Number of patients: 158<br/>Female/male: 68%/32%<br/>Age (mean(sd)): 57 (12)</p> <p><u>Group 3</u><br/>Number of patients: 170<br/>Female/male: 65%/35%<br/>Age (mean(sd)): 60 (11)</p> <p><u>Control</u><br/>Number of patients: 181<br/>Female/male: 66%/34%<br/>Age (mean(sd)): 60 (13)</p> <p><u>Eligibility criteria:</u> Eligible patients had heart failure or ischemic heart disease. Heart failure patients were included if they had objective evidence of left ventricular dysfunction. Ischemic heart disease patients were included if they had a diagnosis of CAD, angina, or MI; definitive diagnostic testing; or more than 2 prescriptions for long-acting nitrates.</p> | <p>Number of sites: 1 academic primary care center with 4 ambulatory clinic sites</p> <p>Site affiliation: University</p> <p>Number of practices or physicians: 32 half-day physician "sessions"*</p> <p>Location: United States (Indiana)</p> <p>* Physician sessions were comprised of faculty and residents assigned to provide outpatient care to a specified panel of patients during a specific half-day. Sessions were randomly split into two groups. The pharmacist intervention was then randomly allocated to half of the physicians in each group.</p> | <p><u>Automated cardiac care reminders vs pharmacist-triggered cardiac care reminders vs both vs usual care</u></p> <p>Intervention aim: Improve heart disease care<br/>QI agent: Medical clinics</p> <p><u>Group 1</u></p> <p>Clinician reminders: Evidence based recommendations were programmed into a locally developed decision support system. Physicians were exposed to this system via computer workstations that all physicians use to write outpatient orders. Recommendations were individualized based on data from patients' electronic medical record.</p> <p><u>Group 2</u></p> <p>Team change: The decision support system displayed heart care recommendations to study pharmacists when patients attended the outpatient pharmacy to receive medications. Pharmacists were free to fill the prescription as usual, discuss the suggestions with the patient, or remind the ordering physician by telephone or automated E-mail.</p> <p><u>Group 3</u></p> <p>Clinician reminders and team change, as above.</p> <p><u>Control</u></p> | <p><u>Influenza</u><br/>Not targeted.</p> <p><u>Pneumococcal</u><br/>Proportion of eligible patients receiving vaccination. This value was treated as a continuous outcome score for each physician in hypothesis testing.</p> <p>Odds ratio of receiving vaccination between treatment and control groups (Crude values calculated by present reviewers)</p> | <p><u>Influenza</u><br/>Not targeted.</p> <p><u>Pneumococcal</u><br/>Follow-up<br/>Group 1: 10/104 (10%)<br/>Group 2: 7/82 (9%)<br/>Group 3: 7/87 (8%)<br/>Control: 1/82 (1%)<br/>Overall P = 0.09 (ANOVA)</p> <p>Follow-up<br/>Group 1<br/>OR = 8.62, p = 0.02</p> <p>Group 2<br/>OR = 7.56, p = 0.06</p> <p>Group 3<br/>OR = 7.09, p = 0.07</p> | <p>The intervention had no measurable effect on either adherence to the evidence-based guidelines or any clinical or subjective patient outcome. The authors suggest that resident physicians may have "rebelled" at the notion of computer-guided patient management. Additionally, pressing the "escape" key could circumvent the reminders provided by the computer system. Reminders requiring mandatory acknowledgement may prove more successful.</p> | 24 |

Online Supplementary Data

http://www.annfammed.org/content/10/6/538/DC1

|                           |                                                                                                                                                                                                                                                                                                                |                                                                                                                                                                                                                                                                                                                                                                                                                                                                                                                                                                                                                                                                                                                                                                                                      |                                                                                                                                                                                                                                                                                                                                                                                    |                                                                                                                                                                                                                                                                                                                                                                                                                                                                                                                                                                                                                                                                                                                                                                                                                                                                                                                                                                                                                                                                                                                                                           |                                                                                                                                                                                                                                                                                                                                                                                                                                            |                                                                                                                                                                                                                                                                                                                                                                                                                                                                                                                                                                                                                                                                                                                                |                                                                                                                                                                                                                                                                                                                                                                                                                                                |    |
|---------------------------|----------------------------------------------------------------------------------------------------------------------------------------------------------------------------------------------------------------------------------------------------------------------------------------------------------------|------------------------------------------------------------------------------------------------------------------------------------------------------------------------------------------------------------------------------------------------------------------------------------------------------------------------------------------------------------------------------------------------------------------------------------------------------------------------------------------------------------------------------------------------------------------------------------------------------------------------------------------------------------------------------------------------------------------------------------------------------------------------------------------------------|------------------------------------------------------------------------------------------------------------------------------------------------------------------------------------------------------------------------------------------------------------------------------------------------------------------------------------------------------------------------------------|-----------------------------------------------------------------------------------------------------------------------------------------------------------------------------------------------------------------------------------------------------------------------------------------------------------------------------------------------------------------------------------------------------------------------------------------------------------------------------------------------------------------------------------------------------------------------------------------------------------------------------------------------------------------------------------------------------------------------------------------------------------------------------------------------------------------------------------------------------------------------------------------------------------------------------------------------------------------------------------------------------------------------------------------------------------------------------------------------------------------------------------------------------------|--------------------------------------------------------------------------------------------------------------------------------------------------------------------------------------------------------------------------------------------------------------------------------------------------------------------------------------------------------------------------------------------------------------------------------------------|--------------------------------------------------------------------------------------------------------------------------------------------------------------------------------------------------------------------------------------------------------------------------------------------------------------------------------------------------------------------------------------------------------------------------------------------------------------------------------------------------------------------------------------------------------------------------------------------------------------------------------------------------------------------------------------------------------------------------------|------------------------------------------------------------------------------------------------------------------------------------------------------------------------------------------------------------------------------------------------------------------------------------------------------------------------------------------------------------------------------------------------------------------------------------------------|----|
|                           |                                                                                                                                                                                                                                                                                                                |                                                                                                                                                                                                                                                                                                                                                                                                                                                                                                                                                                                                                                                                                                                                                                                                      |                                                                                                                                                                                                                                                                                                                                                                                    | Usual care.                                                                                                                                                                                                                                                                                                                                                                                                                                                                                                                                                                                                                                                                                                                                                                                                                                                                                                                                                                                                                                                                                                                                               |                                                                                                                                                                                                                                                                                                                                                                                                                                            |                                                                                                                                                                                                                                                                                                                                                                                                                                                                                                                                                                                                                                                                                                                                |                                                                                                                                                                                                                                                                                                                                                                                                                                                |    |
| Tierney et al. 2005 (306) | <p>Design: Cluster-RCT</p> <p>Group allocation: Half-day physician clinic "sessions" were randomly allocated to two groups. Intervention pharmacists were also randomly allocated to half of the patients in each group, producing four randomly allocated assignments.</p> <p>Follow-up period: 12 months</p> | <p>Number of patients: 706</p> <p><u>Group 1</u><br/>Number of patients: 194<br/>Female/male: 77%/23%<br/>Age (mean(sd)): 50 (14)</p> <p><u>Group 2</u><br/>Number of patients: 161<br/>Female/male: 68%/32%<br/>Age (mean(sd)): 51 (14)</p> <p><u>Group 3</u><br/>Number of patients: 182<br/>Female/male: 71%/29%<br/>Age (mean(sd)): 51 (14)</p> <p><u>Control</u><br/>Number of patients: 169<br/>Female/male: 71%/29%<br/>Age (mean(sd)): 52 (13)</p> <p><u>Eligibility criteria:</u> Patients were 18 years old; had attended a study clinic in the previous year; and had a diagnosis of asthma or COPD, emphysema as recorded on diagnostic imaging, or two more prescriptions for inhaled beta-agonists, corticosteroids, ipratorpium, cromolyn, or oral beta-agonists or theophylline.</p> | <p>Number of sites: 1 academic primary care center</p> <p>Site affiliation: University</p> <p>Number of practices or physicians: 32 half-day clinic sessions* at 4 ambulatory care locations.</p> <p>Location: United States (Indiana)</p> <p>* Each half-day clinic session was comprised of a set of faculty and resident physicians caring for a defined panel of patients.</p> | <p><u>Computer-generated care suggestions vs pharmacist-triggered care reminders vs both vs usual care</u></p> <p>Intervention aim: Improve care of chronic respiratory disease<br/>QI agent: Medical clinic</p> <p><u>Group 1</u></p> <p>Clinician reminders: Evidence based recommendations were programmed into a locally developed decision support system. Physicians were exposed to this system via computer workstations that all physicians use to write outpatient orders, and on the bottom of the medication list in patients' paper charts. Recommendations were individualized based on data from patients' electronic medical record.</p> <p><u>Group 2</u></p> <p>Team change: The decision support system displayed heart care recommendations to study pharmacists when patients attended the outpatient pharmacy to receive medications. Pharmacists were free to fill the prescription as usual, discuss the suggestions with the patient, or remind the ordering physician by telephone or automated E-mail.</p> <p><u>Group 3</u></p> <p>Clinician reminders and team change as above.</p> <p><u>Control</u></p> <p>Usual care.</p> | <p><u>Influenza</u><br/>Proportion of eligible patients receiving vaccination</p> <p>Odds ratio of receiving vaccination between treatment and control groups (crude estimates calculated by present reviewers)</p> <p><u>Pneumococcal</u><br/>Proportion of eligible patients receiving vaccination</p> <p>Odds ratio of receiving vaccination between treatment and control groups (crude estimates calculated by present reviewers)</p> | <p><u>Influenza</u><br/>Follow-up<br/>Group 1: 37/92 (40%)<br/>Group 2: 34/80 (43%)<br/>Group 3: 37/100 (37%)<br/>Control: 36/85 (42%)<br/>Text reports no significant differences.*</p> <p>Follow-up<br/>Group 1<br/>OR = 0.92, p = 0.88<br/>Group 2<br/>OR = 1.01, p = 1.00<br/>Group 3<br/>OR = 0.80, p = 0.55</p> <p><u>Pneumococcal</u><br/>Group 1: 7/89 (8%)<br/>Group 2: 6/76 (8%)<br/>Group 3: 15/95 (16%)<br/>Control: 7/78 (9%)<br/>Text reports no significant differences.*</p> <p>Follow-up<br/>Group 1<br/>OR = 0.87, p = 1.00<br/>Group 2<br/>OR = 0.87, p = 1.00<br/>Group 3<br/>OR = 1.90, p = 0.25</p> <p>* Tested by regression adjusting for physician-level clustering effects, no results provided.</p> | <p>The intervention had no consistent effect on either adherence to the evidence-based guidelines or any clinical or subjective patient outcome. The authors suggest that physicians may have been unwilling to accept computer advice regarding managing chronic illnesses. Indeed, physicians and pharmacists were able to avoid seeing the intervention reminders by pressing the "escape" key, which may have become routine practice.</p> | 22 |
| Turner et al. 1990 (307)  | <p>Design: Cluster RCT</p>                                                                                                                                                                                                                                                                                     | <p>Number of patients: 423</p> <p>Group 1</p>                                                                                                                                                                                                                                                                                                                                                                                                                                                                                                                                                                                                                                                                                                                                                        | <p>Number of sites: 1 general medicine clinic at an academic department of</p>                                                                                                                                                                                                                                                                                                     | <p><u>Patient-held preventive care reminder card and clinician reminder prompts vs clinician reminder prompts only</u></p>                                                                                                                                                                                                                                                                                                                                                                                                                                                                                                                                                                                                                                                                                                                                                                                                                                                                                                                                                                                                                                | <p><u>Influenza</u><br/>Proportion of eligible patients receiving vaccination</p>                                                                                                                                                                                                                                                                                                                                                          | <p><u>Influenza</u><br/>Follow-up<br/>Group 1: 59/132 (47%)</p>                                                                                                                                                                                                                                                                                                                                                                                                                                                                                                                                                                                                                                                                | <p>A patient-held reminder card improved the performance of influenza vaccinations, physician</p>                                                                                                                                                                                                                                                                                                                                              | 21 |

Online Supplementary Data

http://www.annfammed.org/content/10/6/538/DC1

|                           |                                                                                                                                                                                    |                                                                                                                                                                                                                                                                                                                                                                                                                                                                                                                                    |                                                                                                                                                                                                                                                                         |                                                                                                                                                                                                                                                                                                                                                                                                                                                                                                                                                                            |                                                                                                                                                                                                                                                      |                                                                                                                                                                                                                    |                                                                                                                                                                                                                                                                          |    |
|---------------------------|------------------------------------------------------------------------------------------------------------------------------------------------------------------------------------|------------------------------------------------------------------------------------------------------------------------------------------------------------------------------------------------------------------------------------------------------------------------------------------------------------------------------------------------------------------------------------------------------------------------------------------------------------------------------------------------------------------------------------|-------------------------------------------------------------------------------------------------------------------------------------------------------------------------------------------------------------------------------------------------------------------------|----------------------------------------------------------------------------------------------------------------------------------------------------------------------------------------------------------------------------------------------------------------------------------------------------------------------------------------------------------------------------------------------------------------------------------------------------------------------------------------------------------------------------------------------------------------------------|------------------------------------------------------------------------------------------------------------------------------------------------------------------------------------------------------------------------------------------------------|--------------------------------------------------------------------------------------------------------------------------------------------------------------------------------------------------------------------|--------------------------------------------------------------------------------------------------------------------------------------------------------------------------------------------------------------------------------------------------------------------------|----|
|                           | <p>Group allocation: Experimental study with randomized allocation of medical residents to treatment and control groups.</p> <p>Follow-up period: 9 months</p>                     | <p>Number of patients: 177<br/>Age (&gt;64): 65<br/>Female/male: 112/65</p> <p><u>Control group</u><br/>Number of patients: 246<br/>Age (&gt;64): 76<br/>Female/male: 170/76</p> <p><u>Eligibility criteria:</u><br/>Adult patients aged over 65, or younger patients with chronic disease. Patients with previous pneumococcal vaccination were excluded from pneumococcal vaccination rates.</p>                                                                                                                                 | <p>medicine</p> <p>Site affiliation: University</p> <p>Number of practices or physicians: 24*</p> <p>Location: United States (North Carolina)</p> <p>* Physicians randomly allocated to treatment (12 medical residents) and control (12 medical residents) groups.</p> | <p>Intervention aim: Improve preventive care<br/>QI agent: Academic internal medicine clinic</p> <p><u>Group 1</u><br/>Patient education/reminders: Wallet sized preventive care cards were given to patients. Patients were told to present the card to their physicians at each visit.</p> <p>Clinician reminders: Computer generated patient-specific preventive care reminder sheets were generated and attached to each patient's visit chart.</p> <p><u>Control group</u><br/>Clinician reminders, as above.</p>                                                     | <p>Odds ratio of receiving vaccination between treatment and control groups</p> <p><u>Pneumococcal</u><br/>Proportion of eligible patients receiving vaccination</p> <p>Odds ratio of receiving vaccination between treatment and control groups</p> | <p>Control: 51/177 (29%)</p> <p>Follow-up<br/>OR = 2.00<br/>P = 0.002</p> <p><u>Pneumococcal</u><br/>Follow-up<br/>Group 1: 19/86 (22%)<br/>Control: 29/118 (24%)</p> <p>Follow-up<br/>OR = 0.870<br/>P = 0.34</p> | <p>breast examinations, rectal examinations, fecal occult blood tests, and Pap smears; but not mammography or pneumococcal vaccinations.</p>                                                                                                                             |    |
| Turner et al. 1994 (308)  | <p>Design: Cluster RCT</p> <p>Group allocation: Experimental study with randomized allocation of physicians to treatment and control groups.</p> <p>Follow-up period: 8 months</p> | <p>Number of patients: 44 practices enrolled*</p> <p><u>Group 1</u><br/>Number of practices: 15 **</p> <p><u>Control group</u><br/>Number of practices: 22 **</p> <p><u>Eligibility criteria:</u><br/>All adult patients in each practice. Influenza vaccinations were provided for patients &gt;65 years or younger if suffering from a chronic disease.</p> <p>*Outcomes measured for cross sections of ten patients per practice before and after intervention.<br/>** Number of practices remaining at follow-up reported.</p> | <p>Number of sites: 44 private medical practices</p> <p>Site affiliation: Private practices</p> <p>Number of practices or physicians: 44</p> <p>Location: United States (North Carolina)</p>                                                                            | <p><u>Generic clinician reminders sheet VS patient-held reminder card</u></p> <p>Intervention aim: Improve preventive care<br/>QI agent: Physician practices</p> <p><u>Group 1</u><br/>Clinician reminder: A computer was used to generate generic preventive care prompt sheets which were fixed to patient charts.</p> <p><u>Control group</u><br/>Patient education / reminder: Patients received a wallet-sized card with preventive health service prompts. Patients were instructed to carry the cards with them and show them to their physician at each visit.</p> | <p><u>Influenza</u><br/>Proportion of eligible patients receiving vaccination</p> <p>Odds ratio of receiving vaccination between treatment and control groups</p> <p><u>Pneumococcal</u><br/>Not targeted.</p>                                       | <p><u>Influenza</u><br/>Baseline<br/>Group 1: 17%<br/>Control: 20%</p> <p>1 year<br/>Group 1: 24%<br/>Control: 26%</p> <p>1 year<br/>OR = 1.11<br/>p = 0.51</p> <p><u>Pneumococcal</u><br/>Not targeted.</p>       | <p>The results of the intervention were mixed, and in most cases small. Computer prompts increased performance of all preventive measures over time. The card group increased performance of influenza vaccination and mammography, but not other targeted measures.</p> | 19 |
| Walter et al., 2008 (309) | <p>Design: RCT / Cluster-CBA</p> <p>Patients in 15</p>                                                                                                                             | <p>Number of patients: 8912<br/>Female/male: 5649/3236<br/>Age (&gt;65): 1071 (12%)*</p>                                                                                                                                                                                                                                                                                                                                                                                                                                           | <p>Number of practices or physicians: 15 academic primary care practices</p>                                                                                                                                                                                            | <p><u>Postcard reminder with a safety statement and practice-level QI initiative vs regular postcard reminder and practice-level QI initiative vs post care</u></p>                                                                                                                                                                                                                                                                                                                                                                                                        | <p><u>Influenza – Postcard with asthma-specific safety message vs regular postcard (RCT)</u></p>                                                                                                                                                     | <p><u>Influenza – Comparison of patient reminder postcards</u></p>                                                                                                                                                 | <p>Influenza vaccine coverage rates among asthmatic patients were not significantly affected by either adding a safety message to</p>                                                                                                                                    | 18 |

Online Supplementary Data

http://www.annfammed.org/content/10/6/538/DC1

|                                                                                                                                                                                                                                  |                                                                                                                                                                                                                                                           |                                                                                                                                                                                                                                                                                                  |                                                                                                                                                                                                                                                                                                                                                                                                                                                                                                                                                                                                                                                                                                                                                                                                                                                                                                                                                                                                                                                                                                                                                                                                                                                                                                                                                                                                                                                 |                                                                                                                                                                                                                                                                                                                                                                                                                                                                        |                                                                                                                                                                                                                                                                                                                                                                                                                                                                                                                                                                                                                                                                                                                                                                                                                                                                            |                                                                                                                                                                                                                                                                                                                                                                                                                                                                                                                                    |  |
|----------------------------------------------------------------------------------------------------------------------------------------------------------------------------------------------------------------------------------|-----------------------------------------------------------------------------------------------------------------------------------------------------------------------------------------------------------------------------------------------------------|--------------------------------------------------------------------------------------------------------------------------------------------------------------------------------------------------------------------------------------------------------------------------------------------------|-------------------------------------------------------------------------------------------------------------------------------------------------------------------------------------------------------------------------------------------------------------------------------------------------------------------------------------------------------------------------------------------------------------------------------------------------------------------------------------------------------------------------------------------------------------------------------------------------------------------------------------------------------------------------------------------------------------------------------------------------------------------------------------------------------------------------------------------------------------------------------------------------------------------------------------------------------------------------------------------------------------------------------------------------------------------------------------------------------------------------------------------------------------------------------------------------------------------------------------------------------------------------------------------------------------------------------------------------------------------------------------------------------------------------------------------------|------------------------------------------------------------------------------------------------------------------------------------------------------------------------------------------------------------------------------------------------------------------------------------------------------------------------------------------------------------------------------------------------------------------------------------------------------------------------|----------------------------------------------------------------------------------------------------------------------------------------------------------------------------------------------------------------------------------------------------------------------------------------------------------------------------------------------------------------------------------------------------------------------------------------------------------------------------------------------------------------------------------------------------------------------------------------------------------------------------------------------------------------------------------------------------------------------------------------------------------------------------------------------------------------------------------------------------------------------------|------------------------------------------------------------------------------------------------------------------------------------------------------------------------------------------------------------------------------------------------------------------------------------------------------------------------------------------------------------------------------------------------------------------------------------------------------------------------------------------------------------------------------------|--|
| <p>primary care practices were randomly allocated to postcard groups.</p> <p>Within randomized postcard groups, practices were allocated by researchers to “practice QI” or “no QI” groups.</p> <p>Follow-up period: 2 years</p> | <p><u>Group 1, 2, 3, and 4</u><br/>Number of patients: Not reported.</p> <p><u>Eligibility criteria:</u><br/>Asthmatic patients.</p> <p>* This study included children. 3% of patients were aged 2 or younger, and 85% of patients were aged 3 to 65.</p> | <p>Site affiliation: University</p> <p>Number of sites: 1 university health system</p> <p>Location: United States (North Carolina)</p> <p>Description: Primary care practices, including internal medicine, family medicine, and pediatric clinics, belonging to a university health system.</p> | <p><u>reminder with a safety statement and no other QI initiative vs regular postcard reminder and no other QI initiative.</u></p> <p>QI agent: Primary care clinics<br/>Intervention aim: Improve vaccination rates</p> <p><u>Group 1</u></p> <p>Patient education / reminders: A postcard reminder about influenza vaccination was mailed to patients. The postcard contained a safety statement, saying that a recent national study by the American Lung Association demonstrated that influenza vaccination did not worsen asthma symptoms.</p> <p>Continuous quality improvement (or similar): Practice staff attended small group meeting examining previous influenza vaccination performance and potential quality improvement strategies. Practices selected one or more strategies from a list of eight options. Practices implemented patient education (6/8 practices), mail or phone reminders (3 practices), expanded access (1 practice), and chart reminders (1 practice).</p> <p><u>Group 2</u></p> <p>Patient education / reminders: A postcard reminder without a special safety message was mailed to patients.</p> <p>Continuous quality improvement (or similar): As above, for Group 1.</p> <p><u>Group 3</u></p> <p>Patient education / reminders: A postcard reminder about influenza vaccination was mailed to patients. The postcard contained a safety statement for asthmatic patients.</p> <p><u>Group 4</u></p> | <p>Proportion of eligible patients receiving vaccination</p> <p>Odds ratio of receiving vaccination between treatment and control groups</p> <p><u>Influenza – QI practices vs practices without QI initiatives other than patient reminder postcards (CBA)</u></p> <p>Change in practice vaccination proportions taken as continuous performance scores, influenza season 1 to influenza season 2 (mean change (sd))</p> <p><u>Pneumococcal</u><br/>Not targeted.</p> | <p>Follow-up season 1 – Patient survey findings*<br/>Groups 1 and 3: 78%<br/>Groups 2 and 4: 77%</p> <p>Follow-up season 1 – Administrative database findings<br/>Groups 1 and 3: 22%<br/>Groups 2 and 4: 23%</p> <p>Follow-up season 2 – Patient survey findings*<br/>Groups 1 and 3: 76%<br/>Groups 2 and 4: 78%</p> <p>Follow-up season 2 – Administrative database findings<br/>Groups 1 and 3: 27%<br/>Groups 2 and 4: 26%</p> <p>Follow-up season 2<br/>OR = 1.08 **<br/>p = 0.17<br/>95% CI = [0.97, 1.19]</p> <p><u>Influenza – QI intervention analysis</u></p> <p>Follow-up season 2<br/>Groups 1 and 2: +4.5% (3.8%)<br/>Groups 3 and 4: +4.0% (4.6%)<br/>P = 0.55</p> <p><u>Pneumococcal</u><br/>Not targeted.</p> <p>* Survey response rate was 26%.</p> <p>** Estimate adjusted for age, health insurance, ethnicity, and gender by logistic regression.</p> | <p>the regular postcard reminder or by practice improvement interventions evaluated in the study.</p> <p>This study demonstrated that results are sensitive to the method of measuring receipt of vaccination. Analyses of primary care charts or clinical databases may underestimate results, since over 40% of those who received vaccine reported receiving vaccination at a place other than the primary care provider’s office when surveyed by mail or by a computer survey of asthmatic patients attending the office.</p> |  |
|----------------------------------------------------------------------------------------------------------------------------------------------------------------------------------------------------------------------------------|-----------------------------------------------------------------------------------------------------------------------------------------------------------------------------------------------------------------------------------------------------------|--------------------------------------------------------------------------------------------------------------------------------------------------------------------------------------------------------------------------------------------------------------------------------------------------|-------------------------------------------------------------------------------------------------------------------------------------------------------------------------------------------------------------------------------------------------------------------------------------------------------------------------------------------------------------------------------------------------------------------------------------------------------------------------------------------------------------------------------------------------------------------------------------------------------------------------------------------------------------------------------------------------------------------------------------------------------------------------------------------------------------------------------------------------------------------------------------------------------------------------------------------------------------------------------------------------------------------------------------------------------------------------------------------------------------------------------------------------------------------------------------------------------------------------------------------------------------------------------------------------------------------------------------------------------------------------------------------------------------------------------------------------|------------------------------------------------------------------------------------------------------------------------------------------------------------------------------------------------------------------------------------------------------------------------------------------------------------------------------------------------------------------------------------------------------------------------------------------------------------------------|----------------------------------------------------------------------------------------------------------------------------------------------------------------------------------------------------------------------------------------------------------------------------------------------------------------------------------------------------------------------------------------------------------------------------------------------------------------------------------------------------------------------------------------------------------------------------------------------------------------------------------------------------------------------------------------------------------------------------------------------------------------------------------------------------------------------------------------------------------------------------|------------------------------------------------------------------------------------------------------------------------------------------------------------------------------------------------------------------------------------------------------------------------------------------------------------------------------------------------------------------------------------------------------------------------------------------------------------------------------------------------------------------------------------|--|

Online Supplementary Data

http://www.annfammed.org/content/10/6/538/DC1

|                          |                                                                                                                                                                                         |                                                                                                                                                                                                                                                                                                                                                                                                                                                                                                                       |                                                                                                                                                                                                                                                                                               |                                                                                                                                                                                                                                                                                                                                                                                                                                                                                                                                                                                                                                                                                                                                                                                                                                                                                                                                                                      |                                                                                                                                                                                                                |                                                                                                                                                                                                                                                                                                                                                                                                      |                                                                                                                                                                              |    |
|--------------------------|-----------------------------------------------------------------------------------------------------------------------------------------------------------------------------------------|-----------------------------------------------------------------------------------------------------------------------------------------------------------------------------------------------------------------------------------------------------------------------------------------------------------------------------------------------------------------------------------------------------------------------------------------------------------------------------------------------------------------------|-----------------------------------------------------------------------------------------------------------------------------------------------------------------------------------------------------------------------------------------------------------------------------------------------|----------------------------------------------------------------------------------------------------------------------------------------------------------------------------------------------------------------------------------------------------------------------------------------------------------------------------------------------------------------------------------------------------------------------------------------------------------------------------------------------------------------------------------------------------------------------------------------------------------------------------------------------------------------------------------------------------------------------------------------------------------------------------------------------------------------------------------------------------------------------------------------------------------------------------------------------------------------------|----------------------------------------------------------------------------------------------------------------------------------------------------------------------------------------------------------------|------------------------------------------------------------------------------------------------------------------------------------------------------------------------------------------------------------------------------------------------------------------------------------------------------------------------------------------------------------------------------------------------------|------------------------------------------------------------------------------------------------------------------------------------------------------------------------------|----|
|                          |                                                                                                                                                                                         |                                                                                                                                                                                                                                                                                                                                                                                                                                                                                                                       |                                                                                                                                                                                                                                                                                               | Patient education / reminders: A postcard reminder without a special safety message was mailed to patients.                                                                                                                                                                                                                                                                                                                                                                                                                                                                                                                                                                                                                                                                                                                                                                                                                                                          |                                                                                                                                                                                                                |                                                                                                                                                                                                                                                                                                                                                                                                      |                                                                                                                                                                              |    |
| Warner et al. 2004 (310) | <p>Design: Cluster-CBA</p> <p>Group allocation: Experimental study with medical sites allocated to treatment and control sites by unreported means.</p> <p>Follow-up period: 1 year</p> | <p>Number of patients: 191*<br/>Age and gender distributions not reported.</p> <p><u>Group 1</u><br/>Number of patients: 93*</p> <p><u>Control group</u><br/>Number of patients: 98*</p> <p><u>Eligibility criteria:</u><br/>Patients aged 65 years or older who presented for a scheduled medical visit. Vaccinations were provided to consenting patients who had never been previously vaccinated.</p> <p>* variable between baseline, 6 month, and 1 year measurements. 1 year chart review numbers reported.</p> | <p>Number of sites: 2 hospital-based ambulatory family medical clinics</p> <p>Site affiliation: University</p> <p>Number of practices or physicians: Not reported</p> <p>Location: United States (Florida)</p> <p>* Care sites were allocated to treatment (1 site) and control (1 site).</p> | <p><u>Clinician vaccination prompts affixed to patient charts vs usual care</u></p> <p>Intervention aim: Improve vaccination rates<br/>QI agent: Medical clinics</p> <p><u>Group 1</u></p> <p>Clinician education: An educational session covering the variety of illnesses associated with pneumococcal infection, the use of pneumococcal vaccination, and current recommendations for care was provided to staff.</p> <p>Clinician reminders: Reminders stickers were affixed to the chart of eligible patient-visits. A blue dot was placed on charts of patients for whom vaccination was given, had already been obtained, or declined. Reminder stickers were affixed by medical records staff.</p> <p><u>Control group</u></p> <p>Clinician education: An educational session covering the variety of illnesses associated with pneumococcal infection, the use of pneumococcal vaccination, and current recommendations for care was provided to staff.</p> | <p><u>Influenza</u><br/>Not targeted.</p> <p><u>Pneumococcal</u><br/>Proportion of eligible patients receiving vaccination</p> <p>Odds ratio of receiving vaccination between treatment and control groups</p> | <p><u>Influenza</u><br/>Not targeted.</p> <p><u>Pneumococcal</u><br/>Baseline<br/>Group 1: 56%<br/>Control: 46%</p> <p>Follow-up – 6 months<br/>Group 1: 95/112 (85%)<br/>Control: 75/115 (65%)</p> <p>Follow-up – 12 months<br/>Group 1: 71/93 (76%)<br/>Control: 57/98 (58%)</p> <p>Follow-up– 6 months<br/>OR = 2.98<br/>P &lt; 0.005</p> <p>Follow-up – 12 months<br/>OR = 2.32<br/>P = 0.05</p> | <p>The simple and inexpensive method of placing selective reminders in charts for elderly patients was highly effective in increasing the pneumococcal vaccination rate.</p> | 18 |
| Weaver et al. 2003 (311) | <p>Design: Cluster CBA</p> <p>Group allocation: Study investigators allocated medical centers to treatment and control groups so that between-group</p>                                 | <p>Number of patients: 2284</p> <p><u>Group 1</u><br/>Number of patients: 962<br/>Female/male: 32/930<br/>Age (mean(sd)): 57.1 (sd not reported)</p> <p><u>Control group</u><br/>Number of patients: 1322</p>                                                                                                                                                                                                                                                                                                         | <p>Number of sites: 8 VA spinal cord injury centers*</p> <p>Site affiliation: Veteran's Affairs</p> <p>Number of practices or physicians: Not reported</p> <p>Location: United States</p>                                                                                                     | <p><u>Patient education mailings, provider education, and clinical champions vs usual care</u></p> <p>Intervention aim: Improve vaccination rates<br/>QI agent: Medical center</p> <p><u>Intervention group</u></p>                                                                                                                                                                                                                                                                                                                                                                                                                                                                                                                                                                                                                                                                                                                                                  | <p><u>Influenza</u><br/>Proportion of eligible patients receiving vaccination</p>                                                                                                                              | <p><u>Influenza</u><br/>Baseline<br/>Group 1: 6.3% to 20.7% from site to site.<br/>Control: 5.3% to 25.3% from site to site</p> <p>Follow-up*<br/>Group 1: 396/654 (61%)<br/>Control: 538/992 (54%)</p>                                                                                                                                                                                              | <p>This pilot study demonstrated significantly higher vaccination rates for patients receiving care at the intervention site.</p>                                            | 18 |

Online Supplementary Data

http://www.annfammed.org/content/10/6/538/DC1

|                             |                                                                                                                                                           |                                                                                                                                                                                                                                   |                                                                                                                                                                                                 |                                                                                                                                                                                                                                                                                                                                                                                                                                                                                                                                                                                                                                                                                                                                                                                                                                                                                                                                                                                                                                                                                                                                                                                                                                                      |                                                                                                                                                                                                                                  |                                                                                                                                                                                                                                                                                     |                                                                                                                                                                                                                                                                                               |    |
|-----------------------------|-----------------------------------------------------------------------------------------------------------------------------------------------------------|-----------------------------------------------------------------------------------------------------------------------------------------------------------------------------------------------------------------------------------|-------------------------------------------------------------------------------------------------------------------------------------------------------------------------------------------------|------------------------------------------------------------------------------------------------------------------------------------------------------------------------------------------------------------------------------------------------------------------------------------------------------------------------------------------------------------------------------------------------------------------------------------------------------------------------------------------------------------------------------------------------------------------------------------------------------------------------------------------------------------------------------------------------------------------------------------------------------------------------------------------------------------------------------------------------------------------------------------------------------------------------------------------------------------------------------------------------------------------------------------------------------------------------------------------------------------------------------------------------------------------------------------------------------------------------------------------------------|----------------------------------------------------------------------------------------------------------------------------------------------------------------------------------------------------------------------------------|-------------------------------------------------------------------------------------------------------------------------------------------------------------------------------------------------------------------------------------------------------------------------------------|-----------------------------------------------------------------------------------------------------------------------------------------------------------------------------------------------------------------------------------------------------------------------------------------------|----|
|                             | <p>differences in site characteristics would be minimized</p> <p>Follow-up period: 5 months</p>                                                           | <p>Female/male: 30/1292<br/>Age (mean(sd)): 54.6 (sd not reported)</p> <p><u>Eligibility criteria:</u> Veterans with spinal cord injury (i.e.: those who received care at the study sites within 2 years prior to the study.)</p> | <p>(Multiple states)</p> <p>* Sites were allocated to treatment (4 SCI centers) and control (4 SCI centers) groups.</p>                                                                         | <p>Patient education / reminders: Reminder letters and education fliers were mailed to veterans. The fliers emphasized the high risk of respiratory complications among individuals with spinal cord injury, and common misconceptions. The letter encouraged veterans to be vaccinated at any location. Bright reminder posters were posted in clinic spaces.</p> <p>Clinician education: Posters were posted in clinic spaces. Letters of endorsement from the Paralyzed Veterans of America and the VA Spinal Cord Injury and Disease Strategic Healthcare Group were sent, along with literature on vaccination effectiveness and importance, to intervention providers.</p> <p>CQI (or similar): Clinical champions were selected among interested health care personnel. These champions included spinal cord injury chiefs, nurse managers, and spinal cord injury physicians with an interest in vaccination. Investigators worked with champions, via regular conference calls, to resolve problems as vaccination barriers were identified.</p> <p><u>Control characteristics:</u></p> <p>Usual care. One intervention site and two comparison sites report also having nurse standing orders for vaccination during the study period.</p> | <p>Odds ratio of receiving vaccination between treatment and control groups</p> <p><u>Pneumococcal</u><br/>Not targeted.</p>                                                                                                     | <p>Follow-up<br/>OR = 1.30<br/>P = 0.01</p> <p><u>Pneumococcal</u><br/>Not targeted.</p> <p>* Numerators and denominators estimated by present reviewers from other study data. Additionally, intervention patients were older, and had a higher prevalence of chronic illness.</p> |                                                                                                                                                                                                                                                                                               |    |
| Wilkinson et al. 2002 (312) | <p>Design: CCT</p> <p>Group allocation: Experimental study with patients randomly allocated to treatment and control groups.</p> <p>Follow-up period:</p> | <p>Number of patients: 277<br/>Female/male: 19/258<br/>Group-specific gender and age distributions not reported.</p> <p><u>Group 1</u><br/>Number of patients: 141</p> <p><u>Control group</u><br/>Number of patients: 136</p>    | <p>Number of sites: 1 VA health center primary care clinic</p> <p>Site affiliation: Veteran's Affairs</p> <p>Number of practices or physicians: Not reported</p> <p>Location: United States</p> | <p><u>Patient pre-activation with an pre-appointment guidebook vs usual care</u></p> <p>Intervention aim: Improve preventive care<br/>QI agent: Medical clinics</p> <p><u>Group 1</u></p> <p>Patient education / reminders: Patients were mailed an appointment guidebook</p>                                                                                                                                                                                                                                                                                                                                                                                                                                                                                                                                                                                                                                                                                                                                                                                                                                                                                                                                                                        | <p><u>Influenza</u><br/>Proportion of eligible patients receiving vaccination</p> <p>Odds ratio of receiving vaccination between treatment and control groups</p> <p><u>Pneumococcal</u><br/>Proportion of eligible patients</p> | <p><u>Influenza</u><br/>Follow-up*<br/>Group 1: 48/141 (34%)<br/>Control: 25/106 (24%)</p> <p>Follow-up<br/>OR = 1.67<br/>P = 0.10</p> <p><u>Pneumococcal</u><br/>Follow-up*</p>                                                                                                    | <p>The primary hypothesis that patients pre-activated by an appointment guidebook would perceive primary care visits as more effective than patients not receiving a guidebook was supported.</p> <p>However, authors applied a liberal p &lt; 0.10 standard of statistical significance.</p> | 15 |

Online Supplementary Data

http://www.annfammed.org/content/10/6/538/DC1

|                           |                                                                                                                                                                      |                                                                                                                                                                                                                                                                                                                                                                                                                                                                                                                                                                                                                  |                                                                                                                                                                                                  |                                                                                                                                                                                                                                                                                                                                                                                                                                                                                                                                                                                                                                                                                                          |                                                                                                                                                                                                                                                                                                                         |                                                                                                                                                                                                                                                                                                                                                                                                            |                                                                                                                                                                                                                                                                                                                                                                                                                       |    |
|---------------------------|----------------------------------------------------------------------------------------------------------------------------------------------------------------------|------------------------------------------------------------------------------------------------------------------------------------------------------------------------------------------------------------------------------------------------------------------------------------------------------------------------------------------------------------------------------------------------------------------------------------------------------------------------------------------------------------------------------------------------------------------------------------------------------------------|--------------------------------------------------------------------------------------------------------------------------------------------------------------------------------------------------|----------------------------------------------------------------------------------------------------------------------------------------------------------------------------------------------------------------------------------------------------------------------------------------------------------------------------------------------------------------------------------------------------------------------------------------------------------------------------------------------------------------------------------------------------------------------------------------------------------------------------------------------------------------------------------------------------------|-------------------------------------------------------------------------------------------------------------------------------------------------------------------------------------------------------------------------------------------------------------------------------------------------------------------------|------------------------------------------------------------------------------------------------------------------------------------------------------------------------------------------------------------------------------------------------------------------------------------------------------------------------------------------------------------------------------------------------------------|-----------------------------------------------------------------------------------------------------------------------------------------------------------------------------------------------------------------------------------------------------------------------------------------------------------------------------------------------------------------------------------------------------------------------|----|
|                           | Unclear                                                                                                                                                              | <u>Eligibility criteria:</u><br>Patients scheduled for primary are team visits at the study health clinic.                                                                                                                                                                                                                                                                                                                                                                                                                                                                                                       | (Arizona)                                                                                                                                                                                        | with instructions prior to a scheduled routine visit with their primary care provider. The ten page guidebook included an appointment list where patients could record upcoming appointments; suggestions for getting ready for the appointment, including spaces for writing down questions and concerns; instructions for the day of the appointment, including a place to list medications; sample phrases to assist in discussing issues with the provider; suggestions for completing the visit, including important follow-up issues and health promotion topics like influenza and pneumococcal vaccination; and a notes page.<br><br><u>Control group</u><br>Patients received reminder letters. | receiving vaccination<br><br>Odds ratio of receiving vaccination between treatment and control groups                                                                                                                                                                                                                   | Group 1: 54/141 (38%)<br>Control: 30/106 (28%)<br><br>Follow-up<br>OR = 1.57<br>P = 0.10<br><br>* Results provided for patients in whom chart data was available only (106 of 136 control patients).                                                                                                                                                                                                       |                                                                                                                                                                                                                                                                                                                                                                                                                       |    |
| Winston et al. 2007 (313) | Design:<br>RCT<br><br>Group allocation:<br>Experimental study with patients randomly allocated to treatment and control groups.<br><br>Follow-up period:<br>6 months | Number of patients: 6106<br><br><u>Chronic disease</u><br><u>Group 1</u><br>Number of patients: 1845<br>Female/male: 900/945<br>Age (mean(sd)): 53.8 (0.3)<br><br><u>Control group</u><br>Number of patients: 1866<br>Female/male: 972/894<br>Age (mean(sd)): 53.9 (0.3)<br><br><u>Elderly</u><br><u>Group 1</u><br>Number of patients: 1198<br>Female/male: 707/491<br>Age (mean(sd)): 72.0 (0.2)<br><br><u>Control group</u><br>Number of patients: 1197<br>Female/male: 725/472<br>Age (mean(sd)): 71.4 (0.2)<br><br><u>Eligibility criteria:</u><br>Patients aged 65 years or over, or patients with chronic | Number of sites: 1 Large managed care network<br><br>Site affiliation: Private MCO<br><br>Number of practices or physicians: 5 general medicine clinics<br><br>Location: United States (Georgia) | <u>Nursing telephone patient education calls vs usual care</u><br><br>Intervention aim: Improve vaccination rates<br>QI agent: Managed Care Organization<br><br><u>Group 1</u><br><br>Patient education / reminders: Nurses telephoned eligible patients, inquired about previous pneumococcal vaccination and vaccination beliefs, and explained the vaccination.<br><br>Team change: Nurses trained in pneumococcal vaccine indications and contraindications called eligible patients.<br><br><u>Control group</u><br><br>Patients were exposed to the usual preventive service reminders posted in medical clinics.                                                                                  | <u>Influenza</u><br>Not targeted.<br><br><u>Pneumococcal</u><br>Proportion of eligible patients receiving vaccination<br><br><br><br>Odds ratio of receiving vaccination between treatment and control groups<br><br><br><br>Hazard ratio of time-to-vaccination for all patients in the intervention vs control groups | <u>Influenza</u><br>Not targeted.<br><br><u>Pneumococcal</u><br>Follow-up<br>Chronic disease patients<br>Group 1: 288/1845 (16%)<br>Control: 111/1866 (6%)<br>Elderly patients<br>Group 1: 201/1198 (17%)<br>Control: 100/1197 (8%)<br><br>Follow-up<br>Chronic disease patients<br>OR = 2.21<br>P <0.001<br>Elderly patients<br>OR = 2.92<br>P <0.001<br><br>Follow-up<br>HR = 2.3<br>95% CI = [2.0, 2.7] | Randomized telephone intervention led to a greater than 2-fold increase in pneumococcal vaccination within 6 months compared with standard care in a diverse managed care population.<br><br>Despite being effective, telephone reminder programs may be insufficient to eliminate racial/ethnic disparities if baseline disparities already exist and if disparities are not specifically targeted for intervention. | 25 |



Online Supplementary Data

http://www.annfammed.org/content/10/6/538/DC1

|                              |                                                                                                                                                                           |                                                                                                                                                                                                                                                                                                              |                                                                                                                                                                         |                                                                                                                                                                                                                                                                                                                                                                                                                                                                                                                                                                                                                                                                                                                                                                                                                                                  |                                                                                                                                                                                                                |                                                                                                                                                                                                                                                                                                                                          |                                                                                                                                                                                                                                                                                                                                                                                                                                                                                                                                                                                                                                                                                                                                                                             |    |
|------------------------------|---------------------------------------------------------------------------------------------------------------------------------------------------------------------------|--------------------------------------------------------------------------------------------------------------------------------------------------------------------------------------------------------------------------------------------------------------------------------------------------------------|-------------------------------------------------------------------------------------------------------------------------------------------------------------------------|--------------------------------------------------------------------------------------------------------------------------------------------------------------------------------------------------------------------------------------------------------------------------------------------------------------------------------------------------------------------------------------------------------------------------------------------------------------------------------------------------------------------------------------------------------------------------------------------------------------------------------------------------------------------------------------------------------------------------------------------------------------------------------------------------------------------------------------------------|----------------------------------------------------------------------------------------------------------------------------------------------------------------------------------------------------------------|------------------------------------------------------------------------------------------------------------------------------------------------------------------------------------------------------------------------------------------------------------------------------------------------------------------------------------------|-----------------------------------------------------------------------------------------------------------------------------------------------------------------------------------------------------------------------------------------------------------------------------------------------------------------------------------------------------------------------------------------------------------------------------------------------------------------------------------------------------------------------------------------------------------------------------------------------------------------------------------------------------------------------------------------------------------------------------------------------------------------------------|----|
|                              |                                                                                                                                                                           | diseases. Eligible patients had no record of having received pneumococcal vaccination.                                                                                                                                                                                                                       |                                                                                                                                                                         |                                                                                                                                                                                                                                                                                                                                                                                                                                                                                                                                                                                                                                                                                                                                                                                                                                                  |                                                                                                                                                                                                                |                                                                                                                                                                                                                                                                                                                                          |                                                                                                                                                                                                                                                                                                                                                                                                                                                                                                                                                                                                                                                                                                                                                                             |    |
| Yanagihara et al. 2005 (314) | <p>Design: PCS</p> <p>Group allocation: Observational studies with patients allocated by health plan to treatment and control groups</p> <p>Follow-up period: 2 years</p> | <p>Number of patients: Not reported.</p> <p><u>Group 1</u><br/>Number of patients: Not reported.</p> <p><u>Control group</u><br/>Number of patients: Not reported.</p> <p><u>Eligibility criteria:</u><br/>Patients aged 65 years or older enrolled in a Medicare cost contract or fee-for-service plan.</p> | <p>Number of sites: 1 large HMO</p> <p>Site affiliation: Private MCO</p> <p>Number of practices or physicians: Not reported</p> <p>Location: United States (Hawaii)</p> | <p><u>Health plan intervention with community outreach vs usual care</u></p> <p>Intervention aim: Improve vaccination rates<br/>QI agent: Private MCO</p> <p><u>Group 1</u></p> <p>Patient education / reminders: Newsletter articles, magazine advertisements, and public service announcements were produced. Patients received reminder letters and educational materials. Reminder postcards, and mailing labels were provided to physicians to send to their patients. Posters were distributed across the state.</p> <p>Delivery site changes: Community vaccination clinics were held at 25 to 35 locations throughout the state.</p> <p>Clinician education: Primary care providers were sent print materials highlighting the importance of influenza and pneumococcal vaccinations.</p> <p><u>Control group</u></p> <p>Usual care.</p> | <p><u>Influenza</u><br/>Not targeted.</p> <p><u>Pneumococcal</u><br/>Proportion of eligible patients receiving vaccination</p> <p>Odds ratio of receiving vaccination between treatment and control groups</p> | <p><u>Influenza</u><br/>Not targeted.</p> <p><u>Pneumococcal</u><br/>Baseline<br/>Group 1: 13.3%<br/>Control: Not reported</p> <p>Follow-up – 1 year<br/>Group 1: 34.4%<br/>Control: 24.0%</p> <p>Follow-up – 2 years<br/>Group 1: 42.3%<br/>Control: Not reported</p> <p>Follow-up – 1 year<br/>OR = 1.66<br/>95% CI = [1.58, 1.73]</p> | <p>A quality improvement program that addressed barriers to vaccination through a combination of strategies, including patient and physician reminders, education, a media campaign, and arrangement for vaccine administration at local retail stores, increased both awareness of the vaccine and rates of its administration.</p> <p>The observed intervention effect may be confounded by method of provider remuneration. The intervention cohort consisted of patients in a cost-contract Medicare plan, while the control cohort consisted of patients in a fee-for-service Medicare plan. Remuneration did not change during the trial, and the between group OR at follow-up (OR = 1.66) was different from that at baseline (OR = 0.98, 95% CI [0.88, 0.98]).</p> | 19 |

Exhibit A.6. Studies included in meta-analyses

| First author | Year | Citation | Group | infl | ppv | Study arm included in meta-analyses of quality improvement strategies |                    |                 |                     |                     |                      |                  |                      |                                  |                                |                   |             |
|--------------|------|----------|-------|------|-----|-----------------------------------------------------------------------|--------------------|-----------------|---------------------|---------------------|----------------------|------------------|----------------------|----------------------------------|--------------------------------|-------------------|-------------|
|              |      |          |       |      |     | Any                                                                   | Audit and feedback | Case management | Clinician education | Clinician reminders | Community engagement | CQI (or similar) | Delivery site change | Financial incentives (clinician) | Financial incentives (patient) | Patient reminders | Team change |
| Ahmed        | 2004 | (211)    | 1     | 1    | 0   | 1                                                                     | 0                  | 0               | 0                   | 0                   | 0                    | 0                | 1                    | 0                                | 0                              | 0                 | 0           |
| Ahmed        | 2004 | (211)    | 2     | 0    | 0   | 0                                                                     | 0                  | 0               | 0                   | 0                   | 0                    | 0                | 0                    | 0                                | 0                              | 0                 | 0           |
| Ahmed        | 2004 | (211)    | 3     | 1    | 0   | 1                                                                     | 0                  | 0               | 0                   | 0                   | 0                    | 0                | 1                    | 0                                | 0                              | 0                 | 0           |
| Apkon        | 2005 | (212)    | 1     | 0    | 0   | 0                                                                     | 0                  | 0               | 0                   | 0                   | 0                    | 0                | 0                    | 0                                | 0                              | 0                 | 0           |
| Armstrong    | 1999 | (213)    | 1     | 0    | 0   | 0                                                                     | 0                  | 0               | 0                   | 0                   | 0                    | 0                | 0                    | 0                                | 0                              | 0                 | 0           |
| Arthur       | 2002 | (214)    | 1     | 1    | 0   | 1                                                                     | 0                  | 0               | 0                   | 0                   | 0                    | 1                | 0                    | 0                                | 0                              | 1                 | 0           |
| Baker        | 1998 | (215)    | 1     | 1    | 0   | 1                                                                     | 0                  | 0               | 0                   | 0                   | 0                    | 0                | 0                    | 0                                | 1                              | 0                 | 0           |
| Baker        | 1998 | (215)    | 2     | 1    | 0   | 1                                                                     | 0                  | 0               | 0                   | 0                   | 0                    | 0                | 0                    | 0                                | 1                              | 0                 | 0           |
| Baker        | 1998 | (215)    | 3     | 1    | 0   | 1                                                                     | 0                  | 0               | 0                   | 0                   | 0                    | 0                | 0                    | 0                                | 1                              | 0                 | 0           |
| Barnas       | 1989 | (216)    | 1     | 1    | 0   | 1                                                                     | 0                  | 0               | 0                   | 0                   | 0                    | 0                | 0                    | 0                                | 1                              | 0                 | 0           |
| Barton       | 1990 | (217)    | 1     | 1    | 0   | 1                                                                     | 0                  | 0               | 0                   | 1                   | 0                    | 0                | 0                    | 0                                | 1                              | 0                 | 0           |
| Beck         | 1997 | (218)    | 1     | 1    | 1   | 1                                                                     | 0                  | 0               | 0                   | 0                   | 0                    | 0                | 0                    | 0                                | 0                              | 1                 | 1           |
| Becker       | 1989 | (219)    | 1     | 1    | 1   | 1                                                                     | 0                  | 0               | 0                   | 1                   | 0                    | 0                | 0                    | 0                                | 1                              | 0                 | 0           |
| Becker       | 1989 | (219)    | 2     | 1    | 1   | 1                                                                     | 0                  | 0               | 0                   | 1                   | 0                    | 0                | 0                    | 0                                | 0                              | 0                 | 0           |
| Belcher      | 1990 | (220)    | 1     | 0    | 0   | 0                                                                     | 0                  | 0               | 0                   | 0                   | 0                    | 0                | 0                    | 0                                | 0                              | 0                 | 0           |
| Belcher      | 1990 | (220)    | 2     | 0    | 0   | 0                                                                     | 0                  | 0               | 0                   | 0                   | 0                    | 0                | 0                    | 0                                | 0                              | 0                 | 0           |
| Belcher      | 1990 | (220)    | 3     | 0    | 0   | 0                                                                     | 0                  | 0               | 0                   | 0                   | 0                    | 0                | 0                    | 0                                | 0                              | 0                 | 0           |
| Berg         | 2005 | (221)    | 1     | 1    | 1   | 1                                                                     | 0                  | 0               | 0                   | 1                   | 0                    | 0                | 0                    | 0                                | 1                              | 1                 | 0           |
| Berg         | 2008 | (222)    | 1     | 1    | 0   | 1                                                                     | 0                  | 0               | 0                   | 0                   | 0                    | 0                | 0                    | 0                                | 1                              | 0                 | 0           |
| Berg         | 2008 | (222)    | 2     | 1    | 0   | 1                                                                     | 0                  | 0               | 0                   | 0                   | 0                    | 0                | 0                    | 0                                | 1                              | 1                 | 0           |
| Black        | 1993 | (223)    | 1     | 1    | 0   | 1                                                                     | 0                  | 0               | 0                   | 0                   | 0                    | 0                | 0                    | 0                                | 1                              | 1                 | 0           |
| Brimberry    | 1988 | (224)    | 1     | 1    | 0   | 1                                                                     | 0                  | 0               | 0                   | 0                   | 0                    | 0                | 0                    | 0                                | 1                              | 0                 | 0           |
| Brimberry    | 1988 | (224)    | 2     | 1    | 0   | 1                                                                     | 0                  | 0               | 0                   | 0                   | 0                    | 0                | 0                    | 0                                | 1                              | 0                 | 0           |
| Buchner      | 1987 | (225)    | 1     | 1    | 0   | 1                                                                     | 0                  | 0               | 0                   | 0                   | 0                    | 0                | 0                    | 0                                | 1                              | 0                 | 0           |
| Buffington   | 1991 | (226)    | 1     | 1    | 0   | 1                                                                     | 1                  | 0               | 0                   | 0                   | 0                    | 0                | 0                    | 0                                | 0                              | 0                 | 0           |

Online Supplementary Data

http://www.annfammed.org/content/10/6/538/DC1

| First author    | Year | Citation | Group | infl | ppv | Study arm included in meta-analyses of quality improvement strategies |                    |                 |                     |                     |                      |                  |                      |                                  |                                |                   |             |                        |
|-----------------|------|----------|-------|------|-----|-----------------------------------------------------------------------|--------------------|-----------------|---------------------|---------------------|----------------------|------------------|----------------------|----------------------------------|--------------------------------|-------------------|-------------|------------------------|
|                 |      |          |       |      |     | Any                                                                   | Audit and feedback | Case management | Clinician education | Clinician reminders | Community engagement | CQI (or similar) | Delivery site change | Financial incentives (clinician) | Financial incentives (patient) | Patient reminders | Team change | Visit structure change |
| Buffington      | 1991 | (226)    | 2     | 1    | 0   | 1                                                                     | 1                  | 0               | 0                   | 0                   | 0                    | 0                | 0                    | 0                                | 0                              | 1                 | 0           | 0                      |
| Cardozo         | 1998 | (1)      | 1     | 0    | 0   | 0                                                                     | 0                  | 0               | 0                   | 0                   | 0                    | 0                | 0                    | 0                                | 0                              | 0                 | 0           | 0                      |
| Carter          | 1986 | (227)    | 1     | 0    | 0   | 0                                                                     | 0                  | 0               | 0                   | 0                   | 0                    | 0                | 0                    | 0                                | 0                              | 0                 | 0           | 0                      |
| CDC             | 1995 | (228)    | 1     | 1    | 0   | 1                                                                     | 0                  | 0               | 0                   | 0                   | 0                    | 0                | 0                    | 0                                | 0                              | 1                 | 0           | 0                      |
| Chambers        | 1991 | (229)    | 1     | 1    | 0   | 1                                                                     | 0                  | 0               | 0                   | 1                   | 0                    | 0                | 0                    | 0                                | 0                              | 0                 | 0           | 0                      |
| Chambers        | 1991 | (229)    | 2     | 1    | 0   | 1                                                                     | 0                  | 0               | 0                   | 1                   | 0                    | 0                | 0                    | 0                                | 0                              | 0                 | 0           | 0                      |
| Chan            | 2002 | (230)    | 1     | 1    | 0   | 1                                                                     | 0                  | 0               | 0                   | 1                   | 0                    | 0                | 0                    | 0                                | 0                              | 0                 | 0           | 0                      |
| Cheney          | 1987 | (231)    | 1     | 1    | 1   | 1                                                                     | 0                  | 0               | 0                   | 1                   | 0                    | 0                | 0                    | 0                                | 0                              | 0                 | 0           | 0                      |
| Clayton         | 1999 | (232)    | 1     | 1    | 0   | 1                                                                     | 0                  | 0               | 0                   | 0                   | 0                    | 0                | 0                    | 0                                | 0                              | 1                 | 0           | 0                      |
| Cohen           | 1982 | (233)    | 1     | 1    | 1   | 1                                                                     | 0                  | 0               | 0                   | 1                   | 0                    | 0                | 0                    | 0                                | 0                              | 0                 | 0           | 0                      |
| Cowan           | 1992 | (234)    | 1     | 1    | 0   | 1                                                                     | 0                  | 0               | 0                   | 1                   | 0                    | 0                | 0                    | 0                                | 0                              | 0                 | 0           | 0                      |
| Dalby           | 2000 | (235)    | 1     | 1    | 0   | 1                                                                     | 0                  | 1               | 0                   | 0                   | 0                    | 0                | 0                    | 0                                | 0                              | 0                 | 1           | 0                      |
| Demakis         | 2000 | (236)    | 1     | 0    | 1   | 1                                                                     | 0                  | 0               | 0                   | 1                   | 0                    | 0                | 0                    | 0                                | 0                              | 0                 | 0           | 0                      |
| Dietrich        | 1989 | (237)    | 1     | 0    | 0   | 0                                                                     | 0                  | 0               | 0                   | 0                   | 0                    | 0                | 0                    | 0                                | 0                              | 0                 | 0           | 0                      |
| Fishbein        | 2006 | (238)    | 1     | 1    | 1   | 1                                                                     | 0                  | 0               | 0                   | 1                   | 0                    | 0                | 0                    | 0                                | 0                              | 1                 | 0           | 0                      |
| Frank           | 2004 | (239)    | 1     | 1    | 1   | 1                                                                     | 0                  | 0               | 0                   | 1                   | 0                    | 0                | 0                    | 0                                | 0                              | 0                 | 0           | 0                      |
| Garcia-Aymerich | 2007 | (240)    | 1     | 1    | 1   | 1                                                                     | 0                  | 1               | 0                   | 0                   | 0                    | 0                | 0                    | 0                                | 0                              | 1                 | 1           | 0                      |
| Goebel          | 2005 | (241)    | 1     | 1    | 0   | 1                                                                     | 0                  | 0               | 0                   | 0                   | 0                    | 0                | 0                    | 0                                | 0                              | 0                 | 1           | 0                      |
| Grabenstein     | 1993 | (242)    | 1     | 0    | 0   | 0                                                                     | 0                  | 0               | 0                   | 0                   | 0                    | 0                | 0                    | 0                                | 0                              | 0                 | 0           | 0                      |
| Grabenstein     | 2001 | (243)    | 1     | 1    | 0   | 1                                                                     | 0                  | 0               | 0                   | 0                   | 0                    | 0                | 0                    | 0                                | 0                              | 0                 | 1           | 0                      |
| Gutsch          | 1998 | (244)    | 1     | 1    | 1   | 1                                                                     | 0                  | 0               | 0                   | 1                   | 0                    | 0                | 0                    | 0                                | 0                              | 0                 | 0           | 0                      |
| Gutsch          | 1998 | (244)    | 2     | 1    | 1   | 1                                                                     | 0                  | 0               | 0                   | 1                   | 0                    | 0                | 0                    | 0                                | 0                              | 0                 | 0           | 0                      |
| Harari          | 2008 | (245)    | 1     | 1    | 1   | 1                                                                     | 0                  | 0               | 1                   | 1                   | 0                    | 0                | 0                    | 0                                | 0                              | 1                 | 0           | 0                      |
| Harris          | 1990 | (246)    | 1     | 1    | 0   | 1                                                                     | 0                  | 0               | 0                   | 1                   | 0                    | 0                | 0                    | 0                                | 0                              | 0                 | 0           | 0                      |
| Harris          | 2009 | (247)    | 1     | 0    | 0   | 0                                                                     | 0                  | 0               | 0                   | 0                   | 0                    | 0                | 0                    | 0                                | 0                              | 0                 | 0           | 0                      |
| Herman          | 1994 | (248)    | 1     | 1    | 1   | 1                                                                     | 0                  | 0               | 1                   | 0                   | 0                    | 0                | 0                    | 0                                | 0                              | 1                 | 1           | 0                      |
| Herman          | 1994 | (248)    | 2     | 1    | 1   | 1                                                                     | 0                  | 0               | 1                   | 0                   | 0                    | 0                | 0                    | 0                                | 0                              | 1                 | 0           | 0                      |

Online Supplementary Data

http://www.annfammed.org/content/10/6/538/DC1

| First author | Year | Citation | Group | infl | ppv | Study arm included in meta-analyses of quality improvement strategies |                    |                 |                     |                     |                      |                  |                      |                                  |                                |                   |             |                        |
|--------------|------|----------|-------|------|-----|-----------------------------------------------------------------------|--------------------|-----------------|---------------------|---------------------|----------------------|------------------|----------------------|----------------------------------|--------------------------------|-------------------|-------------|------------------------|
|              |      |          |       |      |     | Any                                                                   | Audit and feedback | Case management | Clinician education | Clinician reminders | Community engagement | CQI (or similar) | Delivery site change | Financial incentives (clinician) | Financial incentives (patient) | Patient reminders | Team change | Visit structure change |
| Hermiz       | 2002 | (249)    | 1     | 1    | 1   | 1                                                                     | 0                  | 1               | 0                   | 0                   | 0                    | 0                | 0                    | 0                                | 0                              | 1                 | 1           | 0                      |
| Hoey         | 1982 | (2)      | 1     | 0    | 0   | 0                                                                     | 0                  | 0               | 0                   | 0                   | 0                    | 0                | 0                    | 0                                | 0                              | 0                 | 0           | 0                      |
| Hogg         | 1998 | (250)    | 1     | 1    | 0   | 1                                                                     | 0                  | 0               | 0                   | 0                   | 0                    | 0                | 0                    | 0                                | 0                              | 1                 | 0           | 0                      |
| Hogg         | 1998 | (250)    | 2     | 1    | 0   | 1                                                                     | 0                  | 0               | 0                   | 0                   | 0                    | 0                | 0                    | 0                                | 0                              | 1                 | 0           | 0                      |
| Hull         | 2002 | (251)    | 1     | 1    | 0   | 1                                                                     | 0                  | 0               | 0                   | 0                   | 0                    | 0                | 0                    | 0                                | 0                              | 1                 | 0           | 0                      |
| Hutchison    | 1989 | (252)    | 1     | 0    | 0   | 0                                                                     | 0                  | 0               | 0                   | 0                   | 0                    | 0                | 0                    | 0                                | 0                              | 0                 | 0           | 0                      |
| Ives         | 1994 | (253)    | 1     | 1    | 0   | 1                                                                     | 0                  | 0               | 0                   | 0                   | 0                    | 0                | 1                    | 1                                | 0                              | 0                 | 0           | 0                      |
| Ives         | 1994 | (253)    | 2     | 0    | 0   | 0                                                                     | 0                  | 0               | 0                   | 0                   | 0                    | 0                | 0                    | 0                                | 0                              | 0                 | 0           | 0                      |
| Jacobson     | 1999 | (254)    | 1     | 0    | 1   | 1                                                                     | 0                  | 0               | 0                   | 0                   | 0                    | 0                | 0                    | 0                                | 0                              | 1                 | 0           | 0                      |
| Jans         | 2000 | (255)    | 1     | 0    | 0   | 0                                                                     | 0                  | 0               | 0                   | 0                   | 0                    | 0                | 0                    | 0                                | 0                              | 0                 | 0           | 0                      |
| Johnson      | 2003 | (256)    | 1     | 0    | 1   | 1                                                                     | 0                  | 0               | 0                   | 0                   | 0                    | 0                | 0                    | 0                                | 0                              | 1                 | 0           | 0                      |
| Johnson      | 2003 | (256)    | 2     | 0    | 1   | 1                                                                     | 0                  | 0               | 0                   | 0                   | 0                    | 0                | 0                    | 0                                | 0                              | 1                 | 0           | 0                      |
| Johnson      | 2003 | (256)    | 3     | 0    | 1   | 1                                                                     | 0                  | 0               | 0                   | 0                   | 0                    | 0                | 0                    | 0                                | 0                              | 1                 | 0           | 0                      |
| Johnson      | 2005 | (257)    | 1     | 1    | 1   | 1                                                                     | 0                  | 1               | 0                   | 1                   | 0                    | 0                | 0                    | 0                                | 0                              | 0                 | 1           | 0                      |
| Karuza       | 1995 | (258)    | 1     | 0    | 0   | 0                                                                     | 0                  | 0               | 0                   | 0                   | 0                    | 0                | 0                    | 0                                | 0                              | 0                 | 0           | 0                      |
| Kellerman    | 2000 | (259)    | 1     | 0    | 0   | 0                                                                     | 0                  | 0               | 0                   | 0                   | 0                    | 0                | 0                    | 0                                | 0                              | 0                 | 0           | 0                      |
| Kerse        | 1999 | (260)    | 1     | 0    | 0   | 0                                                                     | 0                  | 0               | 0                   | 0                   | 0                    | 0                | 0                    | 0                                | 0                              | 0                 | 0           | 0                      |
| Kiefe        | 2001 | (261)    | 1     | 0    | 0   | 0                                                                     | 0                  | 0               | 0                   | 0                   | 0                    | 0                | 0                    | 0                                | 0                              | 0                 | 0           | 0                      |
| Kim          | 1999 | (262)    | 1     | 1    | 1   | 1                                                                     | 1                  | 0               | 0                   | 0                   | 0                    | 0                | 0                    | 0                                | 0                              | 0                 | 1           | 0                      |
| Korn         | 1988 | (263)    | 1     | 1    | 1   | 1                                                                     | 1                  | 0               | 1                   | 1                   | 0                    | 0                | 0                    | 0                                | 0                              | 0                 | 0           | 0                      |
| Kouides      | 1993 | (264)    | 1     | 0    | 0   | 0                                                                     | 0                  | 0               | 0                   | 0                   | 0                    | 0                | 0                    | 0                                | 0                              | 0                 | 0           | 0                      |
| Kouides      | 1998 | (265)    | 1     | 1    | 0   | 1                                                                     | 0                  | 0               | 0                   | 0                   | 0                    | 0                | 0                    | 1                                | 0                              | 0                 | 0           | 0                      |
| Krieger      | 2000 | (266)    | 1     | 1    | 1   | 1                                                                     | 0                  | 0               | 0                   | 0                   | 1                    | 0                | 0                    | 0                                | 0                              | 1                 | 0           | 0                      |
| Larson       | 1982 | (267)    | 1     | 1    | 0   | 1                                                                     | 0                  | 0               | 0                   | 0                   | 0                    | 0                | 0                    | 0                                | 0                              | 1                 | 0           | 0                      |
| Larson       | 1982 | (267)    | 2     | 1    | 0   | 1                                                                     | 0                  | 0               | 0                   | 0                   | 0                    | 0                | 0                    | 0                                | 0                              | 1                 | 0           | 0                      |
| Larson       | 1982 | (267)    | 3     | 1    | 0   | 1                                                                     | 0                  | 0               | 0                   | 0                   | 0                    | 0                | 0                    | 0                                | 0                              | 1                 | 0           | 0                      |
| Latessa      | 2000 | (268)    | 1     | 0    | 1   | 1                                                                     | 0                  | 0               | 0                   | 1                   | 0                    | 1                | 0                    | 0                                | 0                              | 1                 | 0           | 0                      |

Online Supplementary Data

http://www.annfammed.org/content/10/6/538/DC1

| First author | Year | Citation | Group | infl | ppv | Study arm included in meta-analyses of quality improvement strategies |                    |                 |                     |                     |                      |                  |                      |                                  |                                |                   |             |                        |
|--------------|------|----------|-------|------|-----|-----------------------------------------------------------------------|--------------------|-----------------|---------------------|---------------------|----------------------|------------------|----------------------|----------------------------------|--------------------------------|-------------------|-------------|------------------------|
|              |      |          |       |      |     | Any                                                                   | Audit and feedback | Case management | Clinician education | Clinician reminders | Community engagement | CQI (or similar) | Delivery site change | Financial incentives (clinician) | Financial incentives (patient) | Patient reminders | Team change | Visit structure change |
| Latessa      | 2000 | (268)    | 2     | 0    | 1   | 1                                                                     | 0                  | 0               | 0                   | 0                   | 0                    | 0                | 0                    | 0                                | 0                              | 1                 | 0           | 0                      |
| Leirer       | 1989 | (269)    | 1     | 1    | 0   | 1                                                                     | 0                  | 0               | 0                   | 0                   | 0                    | 0                | 0                    | 0                                | 0                              | 1                 | 0           | 0                      |
| Leirer       | 1989 | (269)    | 2     | 1    | 0   | 1                                                                     | 0                  | 0               | 0                   | 0                   | 0                    | 0                | 0                    | 0                                | 0                              | 1                 | 0           | 0                      |
| Leirer       | 1989 | (269)    | 3     | 1    | 0   | 1                                                                     | 0                  | 0               | 0                   | 0                   | 0                    | 0                | 0                    | 0                                | 0                              | 1                 | 0           | 0                      |
| Lemelin      | 2001 | (270)    | 1     | 0    | 0   | 0                                                                     | 0                  | 0               | 0                   | 0                   | 0                    | 0                | 0                    | 0                                | 0                              | 0                 | 0           | 0                      |
| Lennox       | 2010 | (271)    | 1     | 1    | 1   | 1                                                                     | 0                  | 0               | 0                   | 1                   | 0                    | 0                | 0                    | 0                                | 0                              | 0                 | 0           | 0                      |
| Lennox       | 2010 | (271)    | 2     | 1    | 1   | 1                                                                     | 0                  | 0               | 0                   | 1                   | 0                    | 0                | 0                    | 0                                | 0                              | 1                 | 0           | 0                      |
| Lennox       | 2010 | (271)    | 3     | 1    | 1   | 1                                                                     | 0                  | 0               | 0                   | 1                   | 0                    | 0                | 0                    | 0                                | 0                              | 1                 | 0           | 0                      |
| Lobach       | 1997 | (272)    | 1     | 0    | 0   | 0                                                                     | 0                  | 0               | 0                   | 0                   | 0                    | 0                | 0                    | 0                                | 0                              | 0                 | 0           | 0                      |
| Lukasik      | 1987 | (273)    | 1     | 0    | 0   | 0                                                                     | 0                  | 0               | 0                   | 0                   | 0                    | 0                | 0                    | 0                                | 0                              | 0                 | 0           | 0                      |
| Maljanian    | 2005 | (274)    | 1     | 0    | 0   | 0                                                                     | 0                  | 0               | 0                   | 0                   | 0                    | 0                | 0                    | 0                                | 0                              | 0                 | 0           | 0                      |
| Margolis     | 1988 | (275)    | 1     | 1    | 0   | 1                                                                     | 0                  | 0               | 0                   | 0                   | 0                    | 0                | 0                    | 0                                | 0                              | 0                 | 1           | 0                      |
| Margolis     | 1992 | (276)    | 1     | 1    | 0   | 1                                                                     | 0                  | 0               | 1                   | 1                   | 0                    | 0                | 0                    | 0                                | 0                              | 1                 | 1           | 0                      |
| McCaul       | 2002 | (277)    | 1     | 1    | 0   | 1                                                                     | 0                  | 0               | 0                   | 0                   | 0                    | 0                | 0                    | 0                                | 0                              | 1                 | 0           | 0                      |
| McCaul       | 2002 | (277)    | 2     | 1    | 0   | 1                                                                     | 0                  | 0               | 0                   | 0                   | 0                    | 0                | 0                    | 0                                | 0                              | 1                 | 0           | 0                      |
| McCaul       | 2002 | (277)    | 3     | 1    | 0   | 1                                                                     | 0                  | 0               | 0                   | 0                   | 0                    | 0                | 0                    | 0                                | 0                              | 1                 | 0           | 0                      |
| McCaul       | 2002 | (277)    | 4     | 0    | 0   | 0                                                                     | 0                  | 0               | 0                   | 0                   | 0                    | 0                | 0                    | 0                                | 0                              | 0                 | 0           | 0                      |
| McDonald     | 1984 | (278)    | 1     | 1    | 1   | 1                                                                     | 0                  | 0               | 0                   | 1                   | 0                    | 0                | 0                    | 0                                | 0                              | 0                 | 0           | 0                      |
| McDowell     | 1986 | (279)    | 1     | 1    | 0   | 1                                                                     | 0                  | 0               | 0                   | 0                   | 0                    | 0                | 0                    | 0                                | 0                              | 1                 | 0           | 0                      |
| McDowell     | 1986 | (279)    | 2     | 1    | 0   | 1                                                                     | 0                  | 0               | 0                   | 0                   | 0                    | 0                | 0                    | 0                                | 0                              | 1                 | 0           | 0                      |
| McDowell     | 1986 | (279)    | 3     | 1    | 0   | 1                                                                     | 0                  | 0               | 0                   | 1                   | 0                    | 0                | 0                    | 0                                | 0                              | 0                 | 0           | 0                      |
| Moran        | 1992 | (280)    | 1     | 1    | 0   | 1                                                                     | 0                  | 0               | 0                   | 0                   | 0                    | 0                | 0                    | 0                                | 0                              | 1                 | 0           | 0                      |
| Moran        | 1992 | (280)    | 2     | 1    | 0   | 1                                                                     | 0                  | 0               | 0                   | 0                   | 0                    | 0                | 0                    | 0                                | 0                              | 1                 | 0           | 0                      |
| Moran        | 1996 | (281)    | 1     | 1    | 0   | 1                                                                     | 0                  | 0               | 0                   | 0                   | 0                    | 0                | 0                    | 0                                | 0                              | 1                 | 0           | 0                      |
| Moran        | 1996 | (281)    | 2     | 1    | 0   | 1                                                                     | 0                  | 0               | 0                   | 0                   | 0                    | 0                | 0                    | 0                                | 1                              | 0                 | 0           | 0                      |
| Moran        | 1996 | (281)    | 3     | 1    | 0   | 1                                                                     | 0                  | 0               | 0                   | 0                   | 0                    | 0                | 0                    | 0                                | 1                              | 1                 | 0           | 0                      |
| Morrissey    | 1995 | (282)    | 1     | 1    | 1   | 1                                                                     | 0                  | 0               | 0                   | 1                   | 0                    | 0                | 0                    | 1                                | 0                              | 0                 | 1           | 0                      |

Online Supplementary Data

http://www.annfammed.org/content/10/6/538/DC1

| First author   | Year | Citation | Group | infl | ppv | Study arm included in meta-analyses of quality improvement strategies |                    |                 |                     |                     |                      |                  |                      |                                  |                                |                   |             |                        |
|----------------|------|----------|-------|------|-----|-----------------------------------------------------------------------|--------------------|-----------------|---------------------|---------------------|----------------------|------------------|----------------------|----------------------------------|--------------------------------|-------------------|-------------|------------------------|
|                |      |          |       |      |     | Any                                                                   | Audit and feedback | Case management | Clinician education | Clinician reminders | Community engagement | CQI (or similar) | Delivery site change | Financial incentives (clinician) | Financial incentives (patient) | Patient reminders | Team change | Visit structure change |
| Mullooly       | 1987 | (283)    | 1     | 1    | 0   | 1                                                                     | 0                  | 0               | 0                   | 0                   | 0                    | 0                | 0                    | 0                                | 0                              | 1                 | 0           | 0                      |
| Nexoe          | 1997 | (284)    | 1     | 1    | 0   | 1                                                                     | 0                  | 0               | 0                   | 0                   | 0                    | 0                | 0                    | 0                                | 1                              | 1                 | 0           | 0                      |
| Nexoe          | 1997 | (284)    | 2     | 1    | 0   | 1                                                                     | 0                  | 0               | 0                   | 0                   | 0                    | 0                | 0                    | 0                                | 0                              | 1                 | 0           | 0                      |
| Nichol         | 1990 | (285)    | 1     | 1    | 0   | 1                                                                     | 0                  | 0               | 0                   | 1                   | 0                    | 0                | 0                    | 0                                | 0                              | 1                 | 1           | 0                      |
| Nowalk         | 2010 | (286)    | 1     | 0    | 0   | 0                                                                     | 0                  | 0               | 0                   | 0                   | 0                    | 0                | 0                    | 0                                | 0                              | 0                 | 0           | 0                      |
| Nowalk         | 2010 | (286)    | 2     | 1    | 0   | 1                                                                     | 0                  | 0               | 0                   | 0                   | 0                    | 0                | 0                    | 0                                | 1                              | 0                 | 0           | 0                      |
| Nuttall        | 2003 | (287)    | 1     | 0    | 0   | 0                                                                     | 0                  | 0               | 0                   | 0                   | 0                    | 0                | 0                    | 0                                | 0                              | 0                 | 0           | 0                      |
| Nuttall        | 2003 | (287)    | 2     | 0    | 0   | 0                                                                     | 0                  | 0               | 0                   | 0                   | 0                    | 0                | 0                    | 0                                | 0                              | 0                 | 0           | 0                      |
| Ohmit          | 1995 | (288)    | 1     | 1    | 0   | 1                                                                     | 0                  | 0               | 1                   | 0                   | 0                    | 0                | 1                    | 0                                | 0                              | 1                 | 0           | 0                      |
| Puech          | 1998 | (289)    | 1     | 1    | 0   | 1                                                                     | 0                  | 0               | 0                   | 0                   | 0                    | 0                | 0                    | 0                                | 0                              | 1                 | 0           | 0                      |
| Quinley        | 2004 | (290)    | 1     | 0    | 0   | 0                                                                     | 0                  | 0               | 0                   | 0                   | 0                    | 0                | 0                    | 0                                | 0                              | 0                 | 0           | 0                      |
| Satterthwaite  | 1997 | (315)    | 1     | 1    | 0   | 1                                                                     | 0                  | 0               | 0                   | 0                   | 0                    | 0                | 0                    | 0                                | 0                              | 1                 | 0           | 0                      |
| Satterthwaite  | 1997 | (315)    | 2     | 1    | 0   | 1                                                                     | 0                  | 0               | 0                   | 0                   | 0                    | 0                | 0                    | 0                                | 1                              | 1                 | 0           | 0                      |
| Schensul       | 2009 | (316)    | 1     | 1    | 0   | 1                                                                     | 0                  | 0               | 0                   | 0                   | 1                    | 0                | 1                    | 0                                | 0                              | 1                 | 0           | 0                      |
| Shah           | 2006 | (293)    | 1     | 1    | 1   | 1                                                                     | 0                  | 0               | 0                   | 1                   | 0                    | 0                | 0                    | 0                                | 0                              | 1                 | 1           | 0                      |
| Shenson        | 2001 | (294)    | 1     | 0    | 1   | 1                                                                     | 0                  | 0               | 0                   | 0                   | 1                    | 0                | 0                    | 0                                | 0                              | 1                 | 0           | 0                      |
| Siebers        | 1985 | (295)    | 1     | 0    | 1   | 1                                                                     | 0                  | 0               | 1                   | 0                   | 0                    | 0                | 0                    | 0                                | 0                              | 1                 | 0           | 0                      |
| Siriwardena    | 2002 | (296)    | 1     | 1    | 1   | 1                                                                     | 0                  | 0               | 1                   | 1                   | 0                    | 1                | 0                    | 0                                | 0                              | 1                 | 0           | 0                      |
| Smith          | 1999 | (297)    | 1     | 1    | 0   | 1                                                                     | 0                  | 0               | 0                   | 0                   | 0                    | 0                | 0                    | 0                                | 0                              | 1                 | 0           | 0                      |
| Solberg        | 2000 | (298)    | 1     | 0    | 0   | 0                                                                     | 0                  | 0               | 0                   | 0                   | 0                    | 0                | 0                    | 0                                | 0                              | 0                 | 0           | 0                      |
| Spaulding      | 1991 | (299)    | 1     | 1    | 0   | 1                                                                     | 0                  | 0               | 0                   | 0                   | 0                    | 0                | 0                    | 0                                | 0                              | 1                 | 0           | 0                      |
| Tang           | 1999 | (300)    | 1     | 0    | 0   | 0                                                                     | 0                  | 0               | 0                   | 0                   | 0                    | 0                | 0                    | 0                                | 0                              | 0                 | 0           | 0                      |
| Tape           | 1993 | (301)    | 1     | 0    | 0   | 0                                                                     | 0                  | 0               | 0                   | 0                   | 0                    | 0                | 0                    | 0                                | 0                              | 0                 | 0           | 0                      |
| Terrell-Perica | 2001 | (302)    | 1     | 0    | 0   | 0                                                                     | 0                  | 0               | 0                   | 0                   | 0                    | 0                | 0                    | 0                                | 0                              | 0                 | 0           | 0                      |
| Terrell-Perica | 2001 | (302)    | 2     | 0    | 0   | 0                                                                     | 0                  | 0               | 0                   | 0                   | 0                    | 0                | 0                    | 0                                | 0                              | 0                 | 0           | 0                      |
| Thomas         | 2003 | (303)    | 1     | 0    | 1   | 1                                                                     | 0                  | 0               | 0                   | 0                   | 0                    | 0                | 0                    | 0                                | 0                              | 1                 | 0           | 0                      |

Online Supplementary Data

<http://www.annfammed.org/content/10/6/538/DC1>

| First author | Year | Citation | Group | infl | ppv | Study arm included in meta-analyses of quality improvement strategies |                    |                 |                     |                     |                      |                  |                      |                                  |                                |                   |             |                        |
|--------------|------|----------|-------|------|-----|-----------------------------------------------------------------------|--------------------|-----------------|---------------------|---------------------|----------------------|------------------|----------------------|----------------------------------|--------------------------------|-------------------|-------------|------------------------|
|              |      |          |       |      |     | Any                                                                   | Audit and feedback | Case management | Clinician education | Clinician reminders | Community engagement | CQI (or similar) | Delivery site change | Financial incentives (clinician) | Financial incentives (patient) | Patient reminders | Team change | Visit structure change |
| Thomas       | 2003 | (303)    | 2     | 0    | 1   | 1                                                                     | 0                  | 0               | 0                   | 0                   | 0                    | 0                | 0                    | 0                                | 0                              | 1                 | 0           | 0                      |
| Tierney      | 1986 | (304)    | 1     | 0    | 0   | 0                                                                     | 0                  | 0               | 0                   | 0                   | 0                    | 0                | 0                    | 0                                | 0                              | 0                 | 0           | 0                      |
| Tierney      | 1986 | (304)    | 2     | 0    | 0   | 0                                                                     | 0                  | 0               | 0                   | 0                   | 0                    | 0                | 0                    | 0                                | 0                              | 0                 | 0           | 0                      |
| Tierney      | 1986 | (304)    | 3     | 0    | 1   | 1                                                                     | 1                  | 0               | 0                   | 1                   | 0                    | 0                | 0                    | 0                                | 0                              | 0                 | 0           | 0                      |
| Tierney      | 2003 | (305)    | 1     | 0    | 1   | 1                                                                     | 0                  | 0               | 0                   | 1                   | 0                    | 0                | 0                    | 0                                | 0                              | 0                 | 0           | 0                      |
| Tierney      | 2003 | (305)    | 2     | 0    | 1   | 1                                                                     | 0                  | 0               | 0                   | 0                   | 0                    | 0                | 0                    | 0                                | 0                              | 0                 | 1           | 0                      |
| Tierney      | 2003 | (305)    | 3     | 0    | 1   | 1                                                                     | 0                  | 0               | 0                   | 1                   | 0                    | 0                | 0                    | 0                                | 0                              | 0                 | 1           | 0                      |
| Tierney      | 2005 | (306)    | 1     | 1    | 1   | 1                                                                     | 0                  | 0               | 0                   | 1                   | 0                    | 0                | 0                    | 0                                | 0                              | 0                 | 0           | 0                      |
| Tierney      | 2005 | (306)    | 2     | 1    | 1   | 1                                                                     | 0                  | 0               | 0                   | 0                   | 0                    | 0                | 0                    | 0                                | 0                              | 0                 | 1           | 0                      |
| Tierney      | 2005 | (306)    | 3     | 1    | 1   | 1                                                                     | 0                  | 0               | 0                   | 1                   | 0                    | 0                | 0                    | 0                                | 0                              | 0                 | 1           | 0                      |
| Turner       | 1990 | (307)    | 1     | 1    | 1   | 1                                                                     | 0                  | 0               | 0                   | 0                   | 0                    | 0                | 0                    | 0                                | 0                              | 1                 | 0           | 0                      |
| Turner       | 1994 | (308)    | 1     | 0    | 0   | 0                                                                     | 0                  | 0               | 0                   | 0                   | 0                    | 0                | 0                    | 0                                | 0                              | 0                 | 0           | 0                      |
| Walter       | 2008 | (309)    | 1     | 0    | 0   | 0                                                                     | 0                  | 0               | 0                   | 0                   | 0                    | 0                | 0                    | 0                                | 0                              | 0                 | 0           | 0                      |
| Walter       | 2008 | (309)    | 1     | 0    | 0   | 0                                                                     | 0                  | 0               | 0                   | 0                   | 0                    | 0                | 0                    | 0                                | 0                              | 0                 | 0           | 0                      |
| Warner       | 2004 | (310)    | 1     | 0    | 1   | 1                                                                     | 0                  | 0               | 0                   | 1                   | 0                    | 0                | 0                    | 0                                | 0                              | 0                 | 0           | 0                      |
| Weaver       | 2003 | (311)    | 1     | 1    | 0   | 1                                                                     | 0                  | 0               | 1                   | 0                   | 0                    | 1                | 0                    | 0                                | 0                              | 1                 | 0           | 0                      |
| Wilkinson    | 2002 | (312)    | 1     | 0    | 0   | 0                                                                     | 0                  | 0               | 0                   | 0                   | 0                    | 0                | 0                    | 0                                | 0                              | 0                 | 0           | 0                      |
| Winston      | 2007 | (313)    | 1     | 0    | 1   | 1                                                                     | 0                  | 0               | 0                   | 0                   | 0                    | 0                | 0                    | 0                                | 0                              | 1                 | 1           | 0                      |
| Yanagihara   | 2005 | (314)    | 1     | 0    | 1   | 1                                                                     | 0                  | 0               | 1                   | 0                   | 0                    | 0                | 1                    | 0                                | 0                              | 1                 | 0           | 0                      |

*Infl* and *PPV* are indicators for the type of vaccination (i.e.: influenza and pneumococcal, respectively) for which the study contributed to meta-analyses.

**References**

1. Cardozo LJ, Steinberg J, Lepczyk MB, Binnus-Emerick L, Cardozo YM, Aranha AN. Delivery of preventive healthcare to older african-american patients: A performance comparison from two practice models. *American Journal of Managed Care*. 1998;4(6):809-16.
2. Hoey JR, McCallum HP, Lepage EM. Expanding the nurse's role to improve preventive service in an outpatient clinic. *Can Med Assoc J*. 1982 Jul 1;127(1):27-8.
3. Achat H, McIntyre P, Burgess M. Health care incentives in immunisation. *Aust N Z J Public Health*. 1999 JUN;23(3):285-8.
4. Alexy BB, Elnitsky C. Rural mobile health unit: Outcomes. *Public Health Nursing*. 1998 [cited 26 August 2009];15(1):3-11.
5. Anderson C, Martin H. Effectiveness of patient recall system on immunization rates for influenza. *J Fam Pract*. 1979 Oct;9(4):727-30.
6. Anderson KK, Sebaldt RJ, Lohfeld L, Karwalajtys T, Ismaila AS, Goeree R, et al. Patient views on reminder letters for influenza vaccinations in an older primary care patient population - A mixed methods study. *Canadian Journal of Public Health-Revue Canadienne De Sante Publique*. 2008 MAR-APR;99(2):133-6.
7. Anderson KK, Sebaldt RJ, Lohfeld L, Goeree R, Donald FC, Burgess K, et al. Practice and physician characteristics associated with influenza vaccination delivery rates following a patient reminder letter intervention. *Journal of Primary Prevention*. 2008 [cited 26 August 2009];29(1):93-7.
8. Andrews RM, Counahan ML, Hogg GG, McIntyre PB. Effectiveness of a publicly funded pneumococcal vaccination program against invasive pneumococcal disease among the elderly in victoria, australia. *Vaccine*. 2004;23(2):132-8.
9. Andrews RM. Assessment of vaccine coverage following the introduction of a publicly funded pneumococcal vaccine program for the elderly in victoria, australia. *Vaccine*. 2005;23(21):2756-61.
10. Anonymous. Using reminder/recall as an immunization intervention strategy works. *Michigan Medicine*. 2004;103(5):23.
11. Anonymous. Automated standing orders to nurses increase influenza and pneumococcal vaccination rates among inpatients compared with reminders to physicians. *Evidence-based Healthcare & Public Health*. 2005;9(3):211-2.
12. Arthur AJ. The effect of health assessments by practice nurses on uptake of influenza vaccination among older people in the UK. *J Clin Nurs*. 2001 SEP;10(5):716-7.
13. Ashby-Hughes B, Nickerson N. Provider endorsement: The strongest cue in prompting high-risk adults to receive influenza and pneumococcal immunizations. *Clinical excellence for nurse practitioners : the international journal of NPACE*. 1999 [cited 26 August 2009];3(2):97-104.
14. Ashikaga T, Vacek PM, Lewis SO. Evaluation of a community-based education program for individuals with chronic obstructive pulmonary disease. *J Rehabil*. 1980 Apr-Jun;46(2):23-7.
15. Baker A. Flu vaccination audit. *PRACT NURSE*. 2002 09/13;24(4):28.
16. Balas EA, Weingarten S, Garb CT, Blumenthal D, Boren SA, Brown GD. Improving preventive care by prompting physicians. *Archives of Internal Medicine*. 2000;160(3):301-8.
17. Bansal S, Pourbohloul B, Meyers LA. A comparative analysis of influenza vaccination programs. *PLoS Medicine / Public Library of Science*. 2006;3(10):387.
18. Barker WH, Bennett NM, LaForce FM, Waltz EC, Weiner LB, McFlu Project. "McFlu" - the monroe county, new york, medicare vaccine demonstration. *Am J Prev Med*. 1999 APR;16(3):118-27.
19. Bearden DT, Holt T. Statewide impact of pharmacist-delivered adult influenza vaccinations. *American Journal of Preventive Medicine*. 2005;29(5):450-2.
20. Bellaard-Smith E, Stuart RL, Gillespie EE. Improving influenza vaccination rates in a large health service. *HEALTHC INFECT*. 2008 06;13(2):63-7.
21. Bennett NM, Lewis B, Doniger AS, Bell K, Kouides R, LaForce FM, et al. A coordinated, communitywide program in monroe county, new york, to increase influenza immunization rates in the elderly. *Arch Intern Med*. 1994 Aug 8;154(15):1741-5.
22. Berg GD, Thomas E, Silverstein S, Neel CL, Mireles M. Reducing medical service utilization by encouraging vaccines - randomized controlled trial. *Am J Prev Med*. 2004 NOV;27(4):284-8.
23. Berry BB, Murthy VS. Exceeding the healthy people 2000 goal for influenza vaccination through a collaborative effort at eight primary care clinics. *Wis Med J*. 1996 [cited 26 August 2009];95(10):705-10.
24. Birchmeier M, Favrat B, Pécoud A, Abetel G, Karly M, Landry P, et al. Improving influenza vaccination rates in the elderly. *J Fam Pract*. 2002 [cited 26 August 2009];51(10):856.



25. Bloom HG, Wheeler DA, Linn J. In: A managed care organization's attempt to increase influenza and pneumococcal immunizations for older adults in an acute care setting. *Journal of the American Geriatrics Society*; 1999. p. 106-10.
26. Bottum CL, Bacall D, Balsam A, Ellis C, Etkind P, Gardiner C. Prevention update. better than chicken soup: Encouraging older patients to receive influenza immunization. *Caring*. 1995 11;14(11):70-3.
27. Bourdet SV, Kelley M, Rublein J, Williams DM. In: Effect of a pharmacist-managed program of pneumococcal and influenza immunization on vaccination rates among adult inpatients. *American journal of health-system pharmacy*; SEP 1; ; 2003. p. 1767-71.
28. Bourgeois FT, Simons WW, Olson K, Brownstein JS, Mandl KD. Evaluation of influenza prevention in the workplace using a personally controlled health record: Randomized controlled trial. *Journal of Medical Internet Research*. 2008 Jan-Mar;10(1):2-12.
29. Brady WJ, Hissa DC, McConnell M, Wones RG. Should physicians perform their own quality assurance audits? *Journal of general internal medicine*. 1988;3(6):560-5.
30. Breslow L, Somers AR. The lifetime health-monitoring program. A practical approach to preventive medicine. *N Engl J Med*. 1977 Mar 17;296(11):601-8.
31. Brown JB, Nichols GA, Glauber HS. Case-control study of 10 years of comprehensive diabetes care. *Western Journal of Medicine*. 2000;172(2):85-90.
32. Bryant KA, Stover B, Cain L, Levine GL, Siegel J, Jarvis WR. Improving influenza immunization rates among healthcare workers caring for high-risk pediatric patients. *Infection Control and Hospital Epidemiology*. 2004 NOV;25(11):912-7.
33. Byrnes P, Fulton B, Crawford M. An audit of influenza vaccination rates. *Aust Fam Physician*. 2006 [cited 26 August 2009];35(7):551-2.
34. Centers,for Disease Control and Prevention (CDC). Increasing pneumococcal vaccination rates among patients of a national health-care alliance--united states, 1993. *MMWR - Morbidity & Mortality Weekly Report*. 1995;44(40):741-4.
35. Anonymous. From the centers for disease control and prevention. facilitating influenza and pneumococcal vaccination through standing orders programs. *JAMA*. 2003;289(10):1238.
36. Calkins E, Katz LA, Karuza J, Wagner A. The small group consensus process for changing physician practices: Influenza vaccination. *HMO Pract*. 1995 [cited 26 August 2009];9(3):107-10.
37. Clancy CM, Gelfman D, Poses RM. A strategy to improve the utilization of pneumococcal vaccine. *Journal of General Internal Medicine*. 1992 Jan-Feb;7(1):14-8.
38. Clancy DE, Cope DW, Magruder KM, Huang P, Wolfman TE. Evaluating concordance to american diabetes association standards of care for type 2 diabetes through group visits in an uninsured or inadequately insured patient population. *Diabetes Care*. 2003;26(7):2032-6.
39. Clegghorn GD, Nguyen M, Roberts B, Duran G, Tellez T, Alecon M. Practice-based interventions to improve health care for latinos with diabetes. *Ethnicity and Disease*. 2004;14(3):1,117-S1-121.
40. Coady MH, Galea S, Blaney S, Ompad DC, Sisco S, Vlahov D, et al. Project VIVA: A multilevel community-based intervention to increase influenza vaccination rates among hard-to-reach populations in new york city. *American Journal of Public Health*. 2008;98(7):1314-21.
41. Cohen SJ, Weinberger M, Hui SL, Tierney WM, McDonald CJ. The impact of reading on physicians' nonadherence to recommended standards of medical care. *Soc Sci Med*. 1985;21(8):909-14.
42. Cole SA, O'Connor S, Bennett L. Self-help groups for clinic patients with chronic illness. *Prim Care*. 1979 Jun;6(2):325-40.
43. Coyle CM, Currie BP. Improving the rates of inpatient pneumococcal vaccination: Impact of standing orders versus computerized reminders to physicians. *Infection Control and Hospital Epidemiology*. 2004;25(11):904-7.
44. Crawford AG, Sikirica V, Goldfarb N, Popiel RG, Patel M, Wang C, et al. Interactive voice response reminder effects on preventive service utilization. *American Journal of Medical Quality*. 2005;20(6):329-36.
45. D'abbs P, Schmidt B, Dougherty K, Senior K. Implementing a chronic disease strategy in two remote indigenous australian settings: A multi-method pilot evaluation. *Australian Journal of Rural Health*. 2008;16(2):67-74.
46. Daniels NA, Juarbe T, Moreno-John G, Perez-Stable EJ. Effectiveness of adult vaccination programs in faith-based organizations. *Ethn Dis*. 2007 WIN;17(1):15-22.

47. Davidson RA, Fletcher SW, Retchin S, Duh S. A nurse-initiated reminder system for the periodic health examination. implementation and evaluation. *Arch Intern Med.* 1984 Nov;144(11):2167-70.
48. De Bruyn K, De Wulf I, Deneyer H, Saevels J. Community pharmacies help to increase influenza vaccination rates amongst people with diabetes. *J Pharm Belg.* 2008 [cited 26 August 2009];63(4):91-3.
49. De Wals P, Drapeau J. Study of immunization promotion against influenza in nursing homes and long term care facilities in quebec. *Canadian journal of public health. Revue canadienne de santé publique.* 1996;87(5):305-7.
50. Dettori N, Flook BN, Pessl E, Quesenberry K, Loh J, Harris C, et al. Improvements in care and reduced self-management barriers among rural patients with diabetes. *Journal of Rural Health.* 2005;21(2):172-7.
51. Dexheimer JW, Jones I, Waitman R, Talbot T, Gregg W, Aronsky D. Prospective evaluation of a closed-loop, computerized reminder system for pneumococcal vaccination in the emergency department. *AMIA ...Annual Symposium proceedings / AMIA Symposium. AMIA Symposium.* 2006 [cited 26 August 2009]:910.
52. Dexheimer JW. Computerized pneumococcal vaccination reminder system in the adult emergency department. *Vanderbilt University, Nashville, TN.* Aug 2006.
53. Dexheimer JW, Talbot TR, Ye F, Shyr Y, Jones I, Gregg WM, et al. Implementing a computerized pneumococcal vaccination reminder system in an emergency department: A prospective study. *AMIA;867,* 2008.
54. Dexter PR, Perkins S, Overhage JM, Maharry K, Kohler RB, McDonald CJ. A computerized reminder system to increase the use of preventive care for hospitalized patients. *N Engl J Med.* 2001 SEP 27;345(13):965-70.
55. Dexter PR, Perkins SM, Maharry KS, Jones K, McDonald CJ. Inpatient computer-based standing orders vs physician reminders to increase influenza and pneumococcal vaccination rates - a randomized trial. *Jama-Journal of the American Medical Association.* 2004 NOV 17;292(19):2366-71.
56. Díaz Grávalos GJ, Palmeiro Fernández G, Vázquez Fernández LA, Casado Górriz I, Fernández Bernárdez MA, Sobrado Palomares JR. Personalized appointments as a recruitment method for anti-flu vaccination in the elderly. *Atencion primaria / Sociedad Española de Medicina de Familia y Comunitaria.* 1999;24(4):220-3.
57. Doyle DM, Dauterive R, Chuang KH, Ellrodt AG. Translating evidence into practice: Pursuing perfection in pneumococcal vaccination in a rural community. [review] [57 refs]. *Respiratory Care.* 2001;46(11):1258,72; discussion 1273-5.
58. Elangovan S, Kallail KJ, Vargo G. Improving pneumococcal vaccination rates in an elderly population by patient education in an outpatient clinic.[see comment]. *Journal of the American Board of Family Practice.* 1996;9(6):411-3.
59. Etkind P, Simon M, Shannon S, Bottum C, Goldstein R, Werner B, et al. The impact of the medicare influenza demonstration project on influenza vaccination in a county in massachusetts, 1988-1992. *Journal of Community Health.* 1996;21(3):199-209.
60. Ettner SL, Thompson TJ, Stevens MR, Mangione CM, Kim C, Steers WN, et al. Are physician reimbursement strategies associated with processes of care and patient satisfaction for patients with diabetes in managed care? *Health Serv Res.* 2006 [cited 26 August 2009];41(4 1):1221-41.
61. Falconer M, Baxter D, Davenport D. HCAs and immunisation training: Results of a pilot programme... background to the programme was discussed in part one (NiP 2007;39:52-4). *NURS PRACT (LOND).* 2008 2008(40):58.
62. Farmer J, Iversen L, Peterkin G, Strachan P, Kelman H, Proctor K, et al. Acceptability and uptake of a community-based flu immunisation programme. *Health Bulletin.* 2001;59(2):127-35.
63. Fedson DS. Influenza and pneumococcal immunization in medical clinics, 1971-1983. *J Infect Dis.* 1984;149(5):817-8.
64. Fera T, Bluml BM, Ellis WM, Schaller CW, Garrett DG. The diabetes ten city challenge: Interim clinical and humanistic outcomes of a multisite community pharmacy diabetes care program. *Journal of the American Pharmacists Association : JAPhA.* 2008 [cited 26 August 2009];48(2):181-90.
65. Fera T, Bluml BM, Ellis WM. Diabetes ten city challenge: Final economic and clinical results. *Journal of the American Pharmacists Association : JAPhA.* 2009 [cited 26 August 2009];49(3):383-91.

66. Fischer H, Mackenzie T, McCullen K, Everhart R, Estacio RO. Design of a nurse-run, telephone-based intervention to improve lipids in diabetics. *Contemporary Clinical Trials*. 2008;29(5):809-16.
67. Fishbein DB, Willis BC, Cassidy WM, Marioneaux D, Bachino C, Waddington T, et al. Determining indications for adult vaccination: Patient self-assessment, medical record, or both? *Vaccine*. 2006;24(6):803-18.
68. Flanagan JR, Doebbeling BN, Dawson J, Beekmann S. Randomized study of online vaccine reminders in adult primary care. *Proceedings / AMIA ...Annual Symposium.AMIA Symposium*. 1999:755-9.
69. Fontanesi J, Hill L, Olson R, Bennett NM, Kopald D. Mass vaccination clinics versus appointments. *Journal of Medical Practice Management*. 2006;21(5):288-94.
70. Franzini L, Boom J, Nelson C. Cost-effectiveness analysis of a practice-based immunization education intervention. *Ambulatory Pediatrics*. 2007 [cited 26 August 2009];7(2):167-75.
71. Fuchs J. The provision of pharmaceutical advice improves patient vaccination status. *Pharmacy Practice*. 2006;4(4):163-7.
72. Galbis-Reig D, Oley MA, Forburger AF, Teekah TR. Implementation of an educational intervention program to increase influenza vaccination among persons with diabetes mellitus. *Internet Journal of Internal Medicine*. 2001;2(2).
73. Gamble GR, Goldstein AO, Bearmsan RS. Implementing a standing order immunization policy: A minimalist intervention. *Journal of the American Board of Family Medicine*. 2008 JAN-FEB;21(1):38-44.
74. Garrett LE,Jr, Hammond WE, Stead WW. The effects of computerized medical records on provider efficiency and quality of care. *Methods Inf Med*. 1986 Jul;25(3):151-7.
75. Garett DG, Bluml BM. Patient self-management program for diabetes: First-year clinical, humanistic, and economic outcomes. *Journal of the American Pharmacists Association*. 2005 [cited 26 August 2009];45(2):130-7.
76. Gemson DH, Ashford AR, Dickey LL, Raymore SH, Roberts JW, Ehrlich MH, et al. Putting prevention into practice. impact of a multifaceted physician education program on preventive services in the inner city. *Arch Intern Med*. 1995 Nov 13;155(20):2210-6.
77. Gerard MN, Trick WE, Das K, Charles-Damte M, Murphy GA, Benson IM. Use of clinical decision support to increase influenza vaccination: Multi-year evolution of the system. *Journal of the American Medical Informatics Association*. 2008 [cited 26 August 2009];15(6):776-9.
78. Gill JM, McClellan SA. Improving preventive care for women: Impact of a performance improvement program in a family practice office. *Delaware Medical Journal*. 1998;70(1):11-6.
79. Gill JM. Using mailed patient reminders to increase influenza immunization rates among older adults in a primary care office. *Delaware Medical Journal*. 1999;71(10):427-31.
80. Gill JM, Saldarriaga AM. The impact of a computerized physician reminder and a mailed patient reminder on influenza immunizations for older patients. *Delaware Medical Journal*. 2000;72(10):425-30.
81. Gill JM, Ewen E, Nsereko M. Impact of an electronic medical record on quality of care in a primary care office. *Delaware Medical Journal*. 2001;73(5):187-94.
82. Gill JM, DiPrinzio MJ. The medical society of delaware's uniform clinical guidelines for diabetes: Did they have a positive impact on quality of diabetes care? *Delaware Medical Journal*. 2004;76(3):111-22.
83. Ginson SH, Malmberg C, French DJ. Impact on vaccination rates of a pharmacist-initiated influenza and pneumococcal vaccination program. *Can J Hosp Pharm*. 2000 [cited 26 August 2009];53(4):270-5.
84. Goebel LJ. A peer review feedback method of promoting compliance with preventive care guidelines in a resident ambulatory care clinic. *Jt Comm J Qual Improv*. 1997;23(4):196-202.
85. Golden A, Barnett SA, Llorente M, Rodriguez O, Hamdan K, Silverman MA. Managed care quality improvement program to improve vaccination rates in homebound hispanic elderly. *Preventive Medicine in Managed Care*. 2002 Apr 25;3(2):53-8.
86. Grey N, Maljanian R, Staff I, Cruzmarino de Aponte M. Improving care of diabetic patients through a collaborative care model. *Conn Med*. 2002 Jan;66(1):7-11.
87. Gruber T, Marada R. Improving pneumococcal vaccination rates for elderly patients. *New Jersey Medicine*. 2000;97(2):35-9.
88. Guldberg TL, Lauritzen T, Kristensen JK, Vedsted P. The effect of feedback to general practitioners on quality of care for people with type 2 diabetes. A systematic review of the literature. *BMC Family Practice*;10, 2009. Article Number: 30. Date of Publication: 2009.

89. Hak E, Hermens RP, van EGA, Kuyvenhoven MM, de MRA. Population-based prevention of influenza in dutch general practice. *British Journal of General Practice*. 1997;47(419):363-6.
90. Hak E, van Essen GA, Stalman WAB, de Melker RA. Improving influenza vaccination coverage among high-risk patients: A role for computer-supported prevention strategy? *Fam Pract*. 1998 APR;15(2):138-43.
91. Hak E, Hermens RP, Hoes AW, Verheij TJ, Kuyvenhoven MM, van Essen GA. Effectiveness of a coordinated nation-wide programme to improve influenza immunisation rates in the netherlands. *Scand J Prim Health Care*. 2000;18(4):237-41.
92. Hannah KL, Schade CP, Cochran R, Brehm JG. Promoting influenza and pneumococcal immunization in older adults. *Jt Comm J Qual Patient Saf*. 2005 [cited 26 August 2009];31(5):286-93.
93. Harris M, Smith BJ, Veale A, Esterman A, Frith PA, Selim P. Providing patients with reviews of evidence about COPD treatments: A controlled trial of outcomes. *Chronic respiratory disease*. 2006;3(3):133-40.
94. Henk M, Froom J. Outreach by primary-care physicians. *JAMA*. 1975 [cited 12 July 2010];233(3):256-9.
95. Hicks P, Tarr GAM, Hicks XP. Reminder cards and immunization rates among latinos and the rural poor in northeast colorado. *Journal of the American Board of Family Medicine*. 2007 [cited 26 August 2009];20(6):581-6.
96. Hogg W, Lemelin J, Graham ID, Grimshaw J, Martin C, Moore L, et al. Improving prevention in primary care: Evaluating the effectiveness of outreach facilitation. *Fam Pract*. 2008 [cited 26 August 2009];25(1):40-8.
97. Honkanen PO, Keistinen T, Kivela S-. The impact of vaccination strategy and methods of information on influenza and pneumococcal vaccination coverage in the elderly population. *Vaccine*. 1997;15(3):317-20.
98. Honkanen P, Laara E, Pyhala R, Kivela S-, Helena MP. Comparison of two vaccination programmes in preventing influenza-related hospitalization among the elderly during two consecutive seasons. *Scandinavian Journal of Infectious Diseases*. 2006;38(6-7):506-11.
99. Houston TK, Wall T, Allison JJ, Palonen K, Willett LL, Keife CI, et al. Implementing achievable benchmarks in preventive health: A controlled trial in residency education. *Academic medicine : Journal of the Association of American Medical Colleges*. 2006;81(7):608-16.
100. Humair J-, Buchs CR, Stalder H. Promoting influenza vaccination of elderly patients in primary care. *Fam Pract*. 2002 [cited 26 August 2009];19(4):383-9.
101. Hussain KA, Kelton GM. Utilization of health care quality markers in a family medicine outpatient setting. *Family Medicine*. 2006;38(7):490-3.
102. Hutchison BG, Shannon HS. Effect of repeated annual reminder letters on influenza immunization among elderly patients. *J Fam Pract*. 1991;33(2):187-9.
103. Irigoyen MM, Findley S, Wang D, Chen S, Chimkin F, Pena O, et al. Challenges and successes of immunization registry reminders at inner-city practices. *Ambulatory Pediatrics*. 2006 [cited 26 August 2009];6(2):100-4.
104. Jha AK, Perlin JB, Kizer KW, Dudley RA. Effect of the transformation of the veterans affairs health care system on the quality of care. *New England Journal of Medicine*. 2003;348(22):2218-27.
105. Jha AK, Wright SM, Perlin JB. In: The impact of performance measurement on vaccination rates and pneumonia admissions in the veterans affairs healthcare system. *Journal of general internal medicine; APR; ; 2003*. p. 285-.
106. Jha AK, Wright SM, Perlin JB. Performance measures, vaccinations, and pneumonia rates among high-risk patients in veterans administration health care. *Am J Public Health*. 2007 [cited 26 August 2009];97(12):2167-72.
107. Johnson EA, Webb WL, McDowall JM, Chasson LL, Oser CS, Grandpre JR, et al. A field-based approach to support improved diabetes care in rural states. *Preventing Chronic Disease*. 2005;2(4):08.
108. Johnson CL, Nicholas A, Divine H, Perrier DG, Blumenschein K, Steinke DT. Outcomes from DiabetesCARE: A pharmacist-provided diabetes management service. *Journal of the American Pharmacists Association : JAPhA*. 2008 [cited 26 August 2009];48(6):722-30.
109. Jones KL, Hammer AL, Swenson C, Appel A, Phibbs S, Hill F, et al. Improving adult immunization rates in primary care clinics. *Nursing Economics*. 2008 [cited 26 August 2009];26(6):404-7.

110. Joshi A, Lichtenstein R, King J, Arora M, Khan S. Evaluation of a computer-based patient education and motivation tool on knowledge, attitudes and practice towards influenza vaccination. *INT ELECTRONIC J HEALTH EDUC*. 2009;12(1-98):1-15.
111. Juma A, Evans MF, Bloom J. Influenza immunizations in the elderly: A continuous quality improvement project. *Methods Inf Med*. 2000 AUG;39(3):217-22.
112. Kamal KM, Madhavan SS, Maine LL. Pharmacy and immunization services: Pharmacists' participation and impact. *Journal of the American Pharmacists Association: JAPhA*. 2003;43(4):470-82.
113. Keyhani S, Ross JS, Hebert P, Dellenbaugh C, Penrod JD, Siu AL. Use of preventive care by elderly male veterans receiving care through the veterans health administration, medicare fee-for-service, and medicare HMO plans. *American Journal of Public Health*. 2007;97(12):2179-85.
114. Kleschen MZ, Holbrook J, Rothbaum AK, Stringer RA, McInerney MJ, Helgeson SD. Improving the pneumococcal immunization rate for patients with diabetes in a managed care population: A simple intervention with a rapid effect. *Joint Commission Journal on Quality Improvement*. 2000;26(9):538-46.
115. Knoell KR, Leeds AL. Influenza vaccination program for elderly outpatients. *Am J Hosp Pharm*. 1991 Feb;48(2):256-9.
116. Kumar S, Deichmann RE, Sarkar I. Effect of physician-specific mailouts aimed at increasing influenza immunization rates. *Journal of the Louisiana State Medical Society*. 1999;151(11):558-65.
117. Landis S, Scarbrough ML. Using a vaccine manager to enhance in-hospital vaccine administration. *J Fam Pract*. 1995 [cited 26 August 2009];41(4):364-9.
118. Larson EB, Olsen E, Cole W, Shortell S. The relationship of health beliefs and a postcard reminder to influenza vaccination. *J Fam Pract*. 1979 Jun;8(6):1207-11.
119. Larson EL, Ferng YH, McLoughlin JW, Wang S, Morse SS. Effect of intensive education on knowledge, attitudes, and practices regarding upper respiratory infections among urban latinos. *Nursing Research*. 2009;58(3):150-7.
120. Lave JR, Ives DG, Traven ND, Kuller LH. Evaluation of a health promotion demonstration program for the rural elderly. *Health Serv Res*. 1996 Aug;31(3):261-81.
121. Lawson F, Baker V, Au D, McElhaney JE. Standing orders for influenza vaccination increased vaccination rates in inpatient settings compared with community rates. *Journals of Gerontology Series A-Biological Sciences and Medical Sciences*. 2000 SEP;55(9):M522-6.
122. Lee S, Song Y, Choi J, Han S. Is the use of physician reminder sticker on medical records effective for improving the rate of recommending influenza vaccination? *Journal*. 2003;24(8):715-20.
123. Litt JCB, Lake PB. Improving influenza vaccine coverage in at-risk groups. *Med J Aust*. 1993;159(8):542,544-546-547.
124. Loughlin SM, Mortazavi A, Garey KW, Rice GK, Birtcher KK. Pharmacist-managed vaccination program increased influenza vaccination rates in cardiovascular patients enrolled in a secondary prevention lipid clinic. *Pharmacotherapy*. 2007 [cited 26 August 2009];27(5):729-33.
125. Luthi J-, Méan F, Ammon C, Burnand B. Evaluation of a population-based prevention program against influenza among swiss elderly people. *Swiss Medical Weekly*. 2002 [cited 26 August 2009];132(41-42):592-7.
126. MacIntyre CR, Kainer MA, Brown GV. A randomised, clinical trial comparing the effectiveness of hospital and community-based reminder systems for increasing uptake of influenza and pneumococcal vaccine in hospitalised patients aged 65 years and over. *Gerontology*. 2003 JAN-FEB;49(1):33-40.
127. Mackey TA, Cole FL, Lindenberg J. Quality improvement and changes in diabetic patient outcomes in an academic nurse practitioner primary care practice. *Journal of the American Academy of Nurse Practitioners*. 2005;17(12):547-53.
128. Malmvall B-, Franzen I, Åbom P-, Hugosson M-. The rate of influenza immunization to people aged 65 years and older was increased from 45% to 70% by a primary health care-based multiprofessional approach. *Qual Manag Health Care*. 2007 [cited 26 August 2009];16(1):51-9.
129. Mandel I, Franks P, Dickinson J. Improving physician compliance with preventive medicine guidelines. *J Fam Pract*. 1985 Sep;21(3):223-4.
130. Mangione CM, Gerzoff RB, Williamson DF, Steers WN, Kerr EA, Brown AF, et al. The association between quality of care and the intensity of diabetes disease management programs. *Annals of Internal Medicine*. 2006;145(2):107-16.

131. Marino W, Fojas A, Medhi M. Vaccination practice education: Long term modification of resident behavior. *Chest*. 1998 [cited 26 August 2009];114(4 SUPPL.).
132. Marrero W, Hernandez L, Garcia R, Gutierrez LM. Immunization program against influenza for adults 65 years or older at a community pharmacy in puerto rico. *P R Health Sci J*. 2006;25(1):35-42.
133. Maskrey N, Parkinson M, Siriwardena AN, Walters A, Weightman NC, McDonald P, et al. Pneumococcal vaccine campaign based in general practice (multiple letters) [7]. *British Medical Journal*. 1997;315(7111):815-6.
134. McCord AD. Clinical impact of a pharmacist-managed diabetes mellitus drug therapy management service. *Pharmacotherapy*. 2006;26(2):248-53.
135. McDonald CJ, Wilson GA, McCabe GP, Jr. Physician response to computer reminders. *JAMA*. 1980 Oct 3;244(14):1579-81.
136. McDonald CJ, Hui SL, Tierney WM. Effects of computer reminders for influenza vaccination on morbidity during influenza epidemics. *M.D.computing : computers in medical practice*. 1992;9(5):304-12.
137. McDonald P, Friedman EHI, Banks A, Anderson R, Carman V. Pneumococcal vaccine campaign based in general practice. *British Medical Journal*. 1997;314(7087):1094-8.
138. McDowell I, Newell C, Rosser W. A follow-up study of patients advised to obtain influenza immunizations. *Fam Med*. 1990;22(4):303-6.
139. Milman U, Ben-Moshe S, Hermoni D. The role of the patient care team in elderly people decision on influenza vaccination. *Patient Educ Couns*. 2005 AUG;58(2):203-8.
140. Mosesso VJ, Packer CR, McMahan J, Auble TE, Paris PM. Influenza immunizations provided by EMS agencies: The MEDICVAX project. *Prehospital Emergency Care*. 2003;7(1):74-8.
141. Nichol KL. Long-term success with the national health objective for influenza vaccination: An institution-wide model. *Journal of general internal medicine*. 1992;7(6):595-600.
142. Nichol KL. Ten-year durability and success of an organized program to increase influenza and pneumococcal vaccination rates among, high-risk adults. *Am J Med*. 1998 NOV;105(5):385-92.
143. Siriwardena AN, Rashid A, Johnson M, Hazelwood L, Wilburn T. Improving influenza and pneumococcal vaccination uptake in high-risk groups in lincolnshire: A quality improvement report from a large rural county. *Quality in Primary Care*. 2003;11(1):19-28.
144. Norton JA, Kuhr L, Vasiloff J, Snow R, Fuerst R. Health care provider and community interventions to improve influenza vaccination rates among medicare beneficiaries in rural ohio. *Am J Epidemiol*. 1997 JUN 1;145(11):226-.
145. Nowalk MP, Zimmerman RK, Lin CJ, Raymund M, Tabbarah M, Wilson SA, et al. Raising adult vaccination rates over 4 years among racially diverse patients at inner-city health centers. *J Am Geriatr Soc*. 2008 [cited 26 August 2009];56(7):1177-82.
146. Ogburn T, Espey EL, Contreras V, Arroyo P. Impact of clinic interventions on the rate of influenza vaccination in pregnant women. *J Reprod Med*. 2007 [cited 26 August 2009];52(9):753-6.
147. Ogden J. A hard sell. *Nursing Times*, vol 89, no 48, 1 December 1993 1993.
148. Onder G, Liperoti R, Bernabei R, Landi F. Case management, preventive strategies, and caregiver attitudes among older adults in home care: Results of the ADHOC study. *Journal of the American Medical Directors Association*. 2008;9(5):337-41.
149. Ovbiagele B, McNair N, Pineda S, Liebeskind DS, Ali LK, Saver JL. A care pathway to boost influenza vaccination rates among inpatients with acute ischemic stroke and transient ischemic attack. *Journal of Stroke and Cerebrovascular Diseases*. 2009;18(1):38-40.
150. Parry MF, Grant B, Iton A, Parry PD, Baranowsky D. Influenza vaccination: A collaborative effort to improve the health of the community. *Infection Control and Hospital Epidemiology*. 2004 NOV;25(11):929-32.
151. Patel PH, Welsh C, Foggs MB. Improved asthma outcomes using a coordinated care approach in a large medical group. [review] [18 refs]. *Disease Management*. 2004;7(2):102-11.
152. Pearson DC, Jackson LA, Wagener B, Sarver L. A comprehensive influenza campaign in a managed care setting. *Vaccine*. 1998;16(18):1718-21.
153. Pearson E, Lang E, Colacone A, Farooki N, Afilalo M. Successful implementation of a combined pneumococcal and influenza vaccination program in a canadian emergency department. *Canadian Journal of Emergency Medicine*. 2005;7(6):371-7.
154. Perenboom RJM, Davidse W. Increasing the coverage of vaccination against influenza by general practitioners. *J Public Health Med*. 1996 JUN;18(2):183-7.

155. Peters JA. Fostering influenza and pneumococcal immunization: A nursing intervention for older adults [dissertation]. UNIVERSITY OF IOWA; 1995.
156. Ploeg J, Black ME, Hutchison BG, Walter SD, Scott EA, Chambers LW. Personal, home and community safety promotion with community-dwelling elderly persons: Response to a public health nurse intervention. *Canadian journal of public health. Revue canadienne de santé publique*. 1994;85(3):188-91.
157. Puig-Barberà J, Ors Zarzoso P, Vilchez Peña C, Lloria Paes F. Impact of various strategies on the rates of flu vaccination in the elderly. *Atencion primaria / Sociedad Española de Medicina de Familia y Comunitaria*. 1999 [cited 26 August 2009];23(6):339-45.
158. Redfield JR, Wang TW. Improving pneumococcal vaccination rates: A three-step approach. *Family Medicine*. 2000;32(5):338-41.
159. Reilly KE. Intervention program improves immunization rates in the elderly. *American Family Physician*. 1997;55(7):2507.
160. Reuben DB, Hirsch SH, Frank JC, Maly RC, Schlesinger MS, Weintraub N, et al. The prevention for elderly persons (PEP) program: A model of municipal and academic partnership to meet the needs of older persons for preventive services. *Journal of the American Geriatrics Society*. 1996;44(11):1394-8.
161. Reynolds CE, Snow V, Qaseem A, Verbonitz L. Improving immunization rates: Initial results from a team-based, systems change approach. *American Journal of Medical Quality*. 2008 [cited 26 August 2009];23(3):176-83.
162. Rhew DC, Glassman PA, Goetz MB. Improving pneumococcal vaccine rates. nurse protocols versus clinical reminders. *Journal of General Internal Medicine*. 1999;14(6):351-6.
163. Rimple D, Weiss SJ, Brett M, Ernst AA. An emergency department-based vaccination program: Overcoming the barriers for adults at high risk for vaccine-preventable diseases. *Academic Emergency Medicine*. 2006;13(9):922-30.
164. Rodney WM, Chopivsky P, Quan M. Adult immunization: The medical record design as a facilitator for physician compliance. *J Med Educ*. 1983;58(7):576-80.
165. Rosser WW, McDowell I, Newell C. Use of reminders for preventive procedures in family medicine. *CMAJ*. 1991 Oct 1;145(7):807-14.
166. Russell ML, Ferguson CA. Improving population influenza vaccine coverage through provider feedback and best practice identification. *Canadian Journal of Public Health*. 2001;92(5):345-6.
167. Salman GF. Continuous quality improvement in rural health clinics. *Journal of General Internal Medicine*. 2005;20(9):862-5.
168. Schectman G, Barnas G, Laud P, Cantwell L, Horton M, Zarling EJ. Prolonging the return visit interval in primary care. *Am J Med*. 2005 [cited 26 August 2009];118(4):393-9.
169. Scheurer DB, Cawley PJ, Brown SB, Heffner JE. Overcoming barriers to pneumococcal vaccination in patients with pneumonia. *American Journal of Medical Quality*. 2006;21(1):18-29.
170. Schluter WW, Ralston DL, Delaney RJ, Sauaia A, Dunn TR. Increasing influenza and pneumococcal vaccination and tuberculosis screening among residents of colorado long-term care facilities. *Eval Health Prof*. 1999 DEC;22(4):466-83.
171. Setia U, Serventi I, Lorenz P. Factors affecting the use of influenza vaccine in the institutionalized elderly. *J Am Geriatr Soc*. 1985 Dec;33(12):856-8.
172. Shahrabani S, Benzion U. Workplace vaccination and other factors impacting influenza vaccination decision among employees in israel. *International Journal of Environmental Research and Public Health*. 2010;7(3) (pp 853-869):ate of Pubaton: Marh 2010.
173. Sheikh A. Pneumococcal vaccination: A practice based audit. *Audit Trends*. 1998 [cited 26 August 2009];6(3):93-5.
174. Shenson D, Benson W, Harris AC. Expanding the delivery of clinical preventive services through community collaboration: The SPARC model. *Preventing Chronic Disease*. 2008;5(1):20.
175. Sherman FT. It's the system, stupid! simple organizational changes improve influenza vaccination rates in older patients. *Geriatrics*. 2002 NOV;57(11):9-10.
176. Shevlin JD, Summers-Bean C, Thomas D, Whitney CG, Todd D, Ray SM. In: A systematic approach for increasing pneumococcal vaccination rates at an inner-city public hospital. *American journal of preventive medicine; FEB; ; 2002*. p. 92-7.
177. Siriwardena AN. Targeting pneumococcal vaccination to high-risk groups: A feasibility study in one general practice. *Postgrad Med J*. 1999 APR;75(882):208-12.

178. Siriwardena AN, Wilburn T, Hazelwood L. Increasing influenza and pneumococcal vaccination rates in high risk groups in one primary care trust as part of a clinical governance programme. *Clinical Governance*. 2003;8(3):200-7.
179. Si D, Bailie RS, Dowden M, O'Donoghue L, Connors C, Robinson GW, et al. Delivery of preventive health services to indigenous adults: Response to a systems-oriented primary care quality improvement intervention. *Med J Aust*. 2007 [cited 26 August 2009];187(8):453-7.
180. Sivaprakasam V, Douglas J, Selvaraj S, MacIntyre S, Carman WF. The effectiveness of national influenza vaccination policies for at-risk populations over 5 seasons in a scottish general practice. *Vaccine*. 2008 JUL 4;26(29-30):3772-7.
181. Slobodkin D, Kitlas J, Zielske P. Opportunities not missed--systematic influenza and pneumococcal immunization in a public inner-city emergency department. *Vaccine*. 1998;16(19):1795-802.
182. Slobodkin D, Zielske PG, Kitlas JL, McDermott MF, Miller S, Rydman R. Demonstration of the feasibility of emergency department immunization against influenza and pneumococcus. *Annals of Emergency Medicine*. 1998;32(5):537-43.
183. Song Y, Oh J, Han S, Choi C. Effectiveness of telephone and postcard reminders for the influenza vaccination: A study in the elderly who have visited a family practice center in a tertiary care hospital. *Journal*. 2000;33(1):109-16.
184. Stevenson KB, McMahon JWS, Harris J, Hillman JR, Helgerson SD. Increasing pneumococcal vaccination rates among residents of long-term-care facilities: Provider-based improvement strategies implemented by peer-review organizations in four western states. *Infection Control and Hospital Epidemiology*. 2000;21(11):705-10.
185. Stone E, Morton S, Hulscher M, Maglione M, Roth E, Grimshaw J, et al. Organisational changes are more effective than education and reminders for raising adult immunisation and cancer screening rates. *Evidence Based Healthcare {EVID.BASED HEALTHC.}*. 2002;6:186-7.
186. Strine TW, Okoro CA, Chapman DP, Beckles GLA, Balluz L, Mokdad AH. The impact of formal diabetes education on the preventive health practices and behaviors of persons with type 2 diabetes. *Preventive Medicine: An International Journal Devoted to Practice and Theory*. 2005 Jul;41(1):79-84.
187. Szilagyi P, Vann JJ, Bordley C, Targonski PV, Poland GA. Review: Patient reminder or recall systems improve immunisation rates. *Evidence-Based Medicine*. 2003 [cited 26 August 2009];8(4):124.
188. Taylor E. Project based approach to increasing uptake of influenza vaccine in an underachieving GP practice. *BR J INFECT CONTROL*. 2007 10;8(5):8-12.
189. Thomas CM, Loewen A, Coffin C, Campbell NR. Improving rates of pneumococcal vaccination on discharge from a tertiary center medical teaching unit: A prospective intervention. *BMC Public Health*. 2005;5:110.
190. Traeger M, Thompson A, Dickson E, Provencio A. Bridging disparity: A multidisciplinary approach for influenza vaccination in an american indian community. *American Journal of Public Health*. 2006;96(5):921-5.
191. Trick WE, Das K, Gerard MN, Charles-Damte M, Murphy G, Benson I, et al. Clinical trial of standing-orders strategies to increase the inpatient influenza vaccination rate. *Infection Control and Hospital Epidemiology*. 2009 [cited 26 August 2009];30(1):86-8.
192. Tucker JB, DeSimone JP. Patient response to mail cues recommending influenza vaccine. *Fam Med*. 1987 May-Jun;19(3):209-12.
193. Turner BJ, Day SC, Borenstein B. A controlled trial to improve delivery of preventive care: Physician or patient reminders? *J Gen Intern Med*. 1989 Sep-Oct;4(5):403-9.
194. Van Amburgh JA, Waite NM, Hobson EH, Migden H. In: Improved influenza vaccination rates in a rural population as a result of a pharmacist-managed immunization campaign. *Pharmacotherapy; SEP; ; 2001. p. 1115-22.*
195. van Essen GA, Kuyvenhoven MM, de Melker RA. Implementing the dutch college of general practitioner's guidelines for influenza vaccination: An intervention study. *British Journal of General Practice*. 1997;47(414):25-9.
196. Van Hoof TJ, Holmboe ES, Barr JK, Reisine S, Cohen KL, Wang Y, et al. Preventive service utilization in older adults: Follow-up results of a quality improvement project. *Preventive Medicine in Managed Care*. 2001 Jun 25;2(3):115-24.
197. Vann JC, Szilagyi P. Patient reminder and patient recall systems to improve immunization rates. *Cochrane Database of Systematic Reviews*. 2005(3):CD003941.pub2.



198. Vila-Corcoles A, Ochoa-Gondar O, Ester F, Sarra N, Ansa X, Saun N. Evolution of vaccination rates after the implementation of a free systematic pneumococcal vaccination in catalonian older adults: 4-years follow-up. *BMC Public Health*;6, 2006. Article Number: 231. Date of Publication: 18 Sep 2006.
199. Vincent EC, Hardin PA, Norman LA, Lester EA, Stinton SH. The effects of a computer-assisted reminder system on patient compliance with recommended health maintenance procedures. *J Gen Intern Med*. 1995;6:56-60.
200. Vondracek TG, Pham TP, Huycke MM. A hospital-based pharmacy intervention program for pneumococcal vaccination. *Arch Intern Med*. 1998 [cited 26 August 2009];158(14):1543-7.
201. Wallis DH, Chin JL, Sur DKC, Lee MY. Increasing rates of influenza vaccination during pregnancy: A multisite interventional study. *Journal of the American Board of Family Medicine*. 2006;19(4):345-9.
202. Weatherill SA, Buxton JA, Daly PC. Immunization programs in non-traditional settings. *Canadian Journal of Public Health*. 2004;95(2):133-7.
203. Weaver FM, Smith B, LaVela S, Wallace C, Evans CT, Hammond M, et al. Interventions to increase influenza vaccination rates in veterans with spinal cord injuries and disorders. *J Spinal Cord Med*. 2007 [cited 26 August 2009];30(1):10-9.
204. Weber V, Bloom F, Pierdon S, Wood C. Employing the electronic health record to improve diabetes care: A multifaceted intervention in an integrated delivery system. *Journal of General Internal Medicine*. 2008 [cited 26 August 2009];23(4):379-82.
205. Wee CC, Phillips RS, Burstin HR, Cook EF, Puopolo AL, Brennan TA, et al. Influence of financial productivity incentives on the use of preventive care. *Am J Med*. 2001 FEB 15;110(3):181-7.
206. Weitzel KW, Goode JV. Implementation of a pharmacy-based immunization program in a supermarket chain. *Journal of the American Pharmaceutical Association*. 2000;40(2):252-6.
207. Welch VL, Oster NV, Gazmararian JA, Rask K, Schild L, Cutler C, et al. Impact of a diabetes disease management program by race and ethnicity. *Disease Management and Health Outcomes*. 2006;14(4):245-52.
208. Wray RJ, Buskirk TD, Jupka K, Lapka C, Jacobsen H, Pakpahan R, et al. Influenza vaccination concerns among older blacks. A randomized controlled trial. *Am J Prev Med*. 2009 [cited 26 August 2009];36(5).
209. Young DC, Bleyl K, Clark T, Oderda G, Liou TG. Increasing pneumococcal vaccination rates among adults with cystic fibrosis. *American Journal of Health-System Pharmacy*. 2004 [cited 26 August 2009];61(14):1490-3.
210. Zimmerman RK, Nowalk MP, Raymund M, Tabbarah M, Hall DG, Wahrenberger JT, et al. Tailored interventions to increase influenza vaccination in neighborhood health centers serving the disadvantaged. *Am J Public Health*. 2003 OCT;93(10):1699-705.
211. Ahmed F, Friedman C, Franks A, Latts LM, Nugent EW, France EK, et al. Effect of the frequency of delivery of reminders and an influenza tool kit on increasing influenza vaccination rates among adults with high-risk conditions. *Am J Manag Care*. 2004 OCT;10(10):698-702.
212. Apkon M, Mattera JA, Lin Z, Herrin J, Bradley EH, Carbone M, et al. A randomized outpatient trial of a decision-support information technology tool. *Arch Intern Med*. 2005 Nov 14;165(20):2388-94.
213. Armstrong K, Berlin M, Schwartz JS, Propert K, Ubel PA. Educational content and the effectiveness of influenza vaccination reminders. *Journal of General Internal Medicine*. 1999 NOV;14(11):695-8.
214. Arthur AJ, Matthews RJ, Jagger C, Clarke M, Hipkin A, Bennison DP. Improving uptake of influenza vaccination among older people: A randomised controlled trial.[see comment]. *British Journal of General Practice*. 720;52(482):717-8.
215. Baker AM, McCarthy B, Gurley VF, Yood MU. Influenza immunization in a managed care organization. *Journal of General Internal Medicine*. 1998 JUL;13(7):469-75.
216. Barnas GP, McKinney WP. Postcard reminders and influenza vaccination. *J Am Geriatr Soc*. 1989 Feb;37(2):195.
217. Barton MB, Schoenbaum SC. Improving influenza vaccination performance in an HMO setting: The use of computer-generated reminders and peer comparison feedback. *Am J Public Health*. 1990 May;80(5):534-6.
218. Beck A, Scott J, Williams P, Robertson B, Jackson D, Gade G, et al. Randomized trial of group outpatient visits for chronically ill older HMO members: The cooperative health care clinic. *J Am Geriatr Soc*. 1997 May;45(5):543-9.

219. Becker DM, Gomez EB, Kaiser DL, Yoshihase A, Hodge RH, Jr. Improving preventive care at a medical clinic: How can the patient help? *Am J Prev Med.* 1989 Nov-Dec;5(6):353-9.
220. Belcher DW. Implementing preventive services. success and failure in an outpatient trial. *Arch Intern Med.* 1990 Dec;150(12):2533-41.
221. Berg GD, Fleegler E, vanVonno CJ, Thomas E. A matched-cohort study of health services utilization outcomes for a heart failure disease management program. *Disease Management.* 2005;8(1):35-41.
222. Berg GD, Silverstein S, Thomas E, Korn AM. Cost and utilization avoidance with mail prompts: A randomized controlled trial. *Am J Manag Care.* 2008;14(11):748-54.
223. Black ME, Ploeg J, Walter SD, Hutchinson BG, Scott EA, Chambers LW. The impact of a public health nurse intervention on influenza vaccine acceptance. *Am J Public Health.* 1993;83(12):1751-3.
224. Brimberry R. Vaccination of high-risk patients for influenza. A comparison of telephone and mail reminder methods. *J Fam Pract.* 1988;26(4):397-400.
225. Buchner DM, Larson EB, White RF. Influenza vaccination in community elderly. A controlled trial of postcard reminders. *J Am Geriatr Soc.* 1987;35(8):755-60.
226. Buffington J, Bell KM, LaForce FM. A target-based model for increasing influenza immunizations in private practice. *genesee hospital medical staff. Journal of general internal medicine.* 1991;6(3):204-9.
227. Carter WB, Beach LR, Inui TS. The flu shot study: Using multiattribute utility theory to design a vaccination intervention. *Organ Behav Hum Decis Process.* 1986 Dec;38(3):378-91.
228. McMahon JW, Hillman JR, McInerney M, Kileen MJ, Christensen C. Increasing influenza vaccination rates for medicare beneficiaries--montana and wyoming, 1994. *MMWR - Morbidity & Mortality Weekly Report.* 1995;44(40):744-6.
229. Chambers CV, Balaban DJ, Carlson BL, Grasberger DM. The effect of microcomputer-generated reminders on influenza vaccination rates in a university-based family practice center. *J Am Board Fam Pract.* 1991;4(1):19-26.
230. Chan L, MacLehose RF, Houck PM. Impact of physician reminders on the use of influenza vaccinations: A randomized trial. *Arch Phys Med Rehabil.* 2002 [cited 26 August 2009];83(3):371-5.
231. Cheney C, Ramsdell JW. Effect of medical records' checklists on implementation of periodic health measures. *Am J Med.* 1987 Jul;83(1):129-36.
232. Clayton AE, McNutt L, Homestead HL, Hartman TW, Senecal S. Public health in managed care: A randomized controlled trial of the effectiveness of postcard reminders. *Am J Public Health.* 1999 [cited 26 August 2009];89(8):1235-7.
233. Cohen DI, Littenberg B, Wetzel C, Neuhauser D. Improving physician compliance with preventive medicine guidelines. *Med Care.* 1982 Oct;20(10):1040-5.
234. Cowan JA, Heckerling PS, Parker JB. Effect of a fact sheet reminder on performance of the periodic health examination: A randomized controlled trial. *Am J Prev Med.* 1992;8(2):104-9.
235. Dalby DM, Sellors JW, Fraser FD, Fraser C, van IC, Howard M. Effect of preventive home visits by a nurse on the outcomes of frail elderly people in the community: A randomized controlled trial.[see comment]. *CMAJ Canadian Medical Association Journal.* 2000;162(4):497-500.
236. Demakis JG, Beauchamp C, Cull WL, Denwood R, Eisen SA, Lofgren R, et al. Improving residents' compliance with standards of ambulatory care: Results from the VA cooperative study on computerized reminders. *JAMA.* 2000 Sep 20;284(11):1411-6.
237. Dietrich AJ, Duhamel M. Improving geriatric preventive care through a patient-held checklist. *Fam Med.* 1989;21(3):195-8.
238. Fishbein DB, Willis BC, Cassidy WM, Marioneaux D, Winston CA. A comprehensive patient assessment and physician reminder tool for adult immunization: Effect on vaccine administration. *Vaccine.* 2006;24(18):3971-83.
239. Frank O, Litt J, Beilby J. Opportunistic electronic reminders. improving performance of preventive care in general practice. *Aust Fam Physician.* 2004;33(1-2):87-90.
240. Garcia-Aymerich J, Hernandez C, Alonso A, Casas A, Rodriguez-Roisin R, Anto JM, et al. Effects of an integrated care intervention on risk factors of COPD readmission. *Respiratory Medicine.* 2007;101(7):1462-9.
241. Goebel LJ, Neitch SM, Mufson MA. Standing orders in an ambulatory setting increases influenza vaccine usage in older people. *J Am Geriatr Soc.* 2005 [cited 26 August 2009];53(6):1008-10.
242. Grabenstein JD, Hartzema AG, Guess HA, Johnston WP. Community pharmacists as immunisation advocates: A pharmacoepidemiologic experiment. *Int J Pharm Pract.* 1993;2:5-10.

243. Grabenstein JD, Guess HA, Hartzema AG, Koch GG, Konrad TR. Effect of vaccination by community pharmacists among adult prescription recipients. *Med Care*. 2001 Apr;39(4):340-8.
244. Gutsch LM, Vaillancourt R, Homes M, Lafoley L, Mulvihill J, Taichmann J, et al. Effect of pharmacist interventions on pneumococcal and influenza vaccination rates: A seamless care approach. *Canadian Pharmaceutical Journal*. 1998;131(8):32-8.
245. Harari D, Iliffe S, Kharicha K. Promotion of health in older people. *Age and Ageing*, vol 37, no 5, September 2008 2008.
246. Harris RP, O'Malley MS, Fletcher SW, Knight BP. Prompting physicians for preventive procedures: A five-year study of manual and computer reminders. *Am J Prev Med*. 1990 May-Jun;6(3):145-52.
247. Harris M, Smith BJ, Veale AJ, Esterman A, Frith PA, Selim P. Providing reviews of evidence to COPD patients: Controlled prospective 12-month trial. *Chronic Respiratory Disease*. 2009;6(3):165-73.
248. Herman CJ, Speroff T, Cebul RD. Improving compliance with immunization in the older adult: Results of a randomized cohort study. *J Am Geriatr Soc*. 1994;42(11):1154-9.
249. Hermiz O, Comino E, Marks G, Daffurn K, Wilson S, Harris M. Randomised controlled trial of home based care of patients with chronic obstructive pulmonary disease. *BMJ*. 2002 Oct 26;325(7370):938.
250. Hogg WE, Bass M, Calonge N, Crouch H, Satenstein G. Randomized controlled study of customized preventive medicine reminder letters in a community practice. *Can Fam Physician*. 1998 Jan;44:81-8.
251. Hull SA, Hagdrup N, Hart B, Griffiths C, Hennessy E. Boosting uptake of influenza immunisation: A randomised controlled trial of telephone appointing in general practice. *British Journal of General Practice*. 2002 [cited 26 August 2009];52(482):712-6.
252. Hutchison BG. Effect of computer-generated nurse/physician reminders on influenza immunization among seniors. *Fam Med*. 1989;21(6):433-7.
253. Ives DG, Lave JR, Traven ND, Kuller LH. Impact of medicare reimbursement on influenza vaccination rates in the elderly. *Prev Med*. 1994;23(2):134-41.
254. Jacobson TA, Thomas DM, Morton FJ, Offutt G, Shevlin J, Ray S. Use of a low-literacy patient education tool to enhance pneumococcal vaccination rates: A randomized controlled trial. *JAMA: Journal of the American Medical Association*. 1999 Aug;282(7):646-50.
255. Jans MP, Schellevis FG, Van HW, van EJT. Improving general practice care of patients with asthma or chronic obstructive pulmonary disease: Evaluation of a quality system.[see comment]. *Effective Clinical Practice*. 2000;3(1):16-24.
256. Johnson EA, Harwell TS, Donahue PM, Weisner MA, McInerney MJ, Holzman GS, et al. Promoting pneumococcal immunizations among rural medicare beneficiaries using multiple strategies. *Journal of Rural Health*. 2003;19(4):506-10.
257. Johnson A, Berg G, Fleegler E, Lehn J. Clinical and utilization outcomes for a heart failure care support program: A matched-cohort study. *Disease Management and Health Outcomes*. 2005;13(5):327-35.
258. Karuza J, Calkins E, Feather J, Hershey CO, Katz L, Majeroni B. Enhancing physician adoption of practice guidelines: Dissemination of influenza vaccination guideline using a small-group consensus process. *Arch Intern Med*. 1995 [cited 26 August 2009];155(6):625-32.
259. Kellerman RD, Allred CT, Frisch LE. Enhancing influenza immunization - postcard and telephone reminders and the challenge of immunization site shift. *Arch Fam Med*. 2000 APR;9(4):368-72.
260. Kerse NM, Flicker L, Jolley D, Arroll B, Young D. Improving the health behaviours of elderly people: Randomised controlled trial of a general practice education programme. *Br Med J*. 1999 SEP 11;319(7211):683-7.
261. Kiefe CI, Allison JJ, Williams OD, Person SD, Weaver MT, Weissman NW. Improving quality improvement using achievable benchmarks for physician feedback: A randomized controlled trial. *JAMA : the journal of the American Medical Association*. 2001;285(22):2871-9.
262. Kim CS, Kristopaitis RJ, Stone E, Pelter M, Sandhu M, Weingarten SR. Physician education and report cards: Do they make the grade? results from a randomized controlled trial. *Am J Med*. 1999 [cited 26 August 2009];107(6):556-60.
263. Korn JE, Schlossberg LA, Rich EC. Improved preventive care following an intervention during an ambulatory care rotation: Carryover to a second setting. *J Gen Intern Med*. 1988 Mar-Apr;3(2):156-60.

264. Kouides RW, Lewis B, Bennett NM, Bell KM, Barker WH, Black ER, et al. A performance-based incentive program for influenza immunization in the elderly. *Am J Prev Med.* 1993 Jul-Aug;9(4):250-5.
265. Kouides RW, Bennett NM, Lewis B, Cappuccio JD, Barker WH, LaForce FM. Performance-based physician reimbursement and influenza immunization rates in the elderly. *Am J Prev Med.* 1998 FEB;14(2):89-95.
266. Krieger JW, Castorina JS, Walls ML, Weaver MR, Ciske S. Increasing influenza and pneumococcal immunization rates: A randomized controlled study of a senior center-based intervention. *Am J Prev Med.* 2000 [cited 26 August 2009];18(2):123-31.
267. Larson EB, Bergman J, Heidrich F, Alvin BL, Schneeweiss R. Do postcard reminders improve influenza compliance? A prospective trial of different postcard "cues". *Med Care.* 1982;20(6):639-48.
268. Latessa RA, Cummings DM, Lilley SH, Morrissey SL. Changing practices in the use of pneumococcal vaccine. *Fam Med.* 2000;32(3):196-200.
269. Leirer VO, Morrow DG, Pariente G, Doksum T. Increasing influenza vaccination adherence through voice mail. *J Am Geriatr Soc.* 1989 Dec;37(12):1147-50.
270. Lemelin J, Hogg W, Baskerville N. Evidence to action: A tailored multifaceted approach to changing family physician practice patterns and improving preventive care. *CMAJ.* 2001;164(6):757-63.
271. Lennox N, Bain C, ReyConde T, Taylor M, Boyle FM, Purdie DM, et al. Cluster randomized-controlled trial of interventions to improve health for adults with intellectual disability who live in private dwellings. *Journal of Applied Research in Intellectual Disabilities.* 2010 Jul;23(4):303-11.
272. Lobach DF, Hammond WE. Computerized decision support based on a clinical practice guideline improves compliance with care standards. *Am J Med.* 1997 Jan;102(1):89-98.
273. Lukasik MH, Pratt G. The telephone: An overlooked technology for prevention in family medicine. *Can Fam Physician.* 1987;33:1997-2001.
274. Maljanian R, Grey N, Staff I, Conroy L. Intensive telephone follow-up to a hospital-based disease management model for patients with diabetes mellitus. *Disease management : DM.* 2005;8(1):15-25.
275. Margolis KL, Lofgren RP, Korn JE. Organizational strategies to improve influenza vaccine delivery. A standing order in a general medicine clinic. *Arch Intern Med.* 1988 Oct;148(10):2205-7.
276. Margolis KL, Nichol KL, Wuorenma J, Von ST. Exporting a successful influenza vaccination program from a teaching hospital to a community outpatient setting. *J Am Geriatr Soc.* 1992;40(10):1021-3.
277. McCaul KD, Johnson RJ, Rothman AJ. The effects of framing and action instructions on whether older adults obtain flu shots. *Health Psychology.* 2002 [cited 26 August 2009];21(6):624-8.
278. McDonald CJ, Hui SL, Smith DM, Tierney WM, Cohen SJ, Weinberger M, et al. Reminders to physicians from an introspective computer medical record. A two-year randomized trial. *Ann Intern Med.* 1984;100(1):130-8.
279. McDowell I, Newell C, Rosser W. Comparison of three methods of recalling patients for influenza vaccination. *CMAJ : Canadian Medical Association journal = journal de l'Association medicale canadienne.* 1986;135(9):991-7.
280. Moran WP, Nelson K, Wofford JL, Velez R. Computer-generated mailed reminders for influenza immunization: A clinical trial. *Journal of general internal medicine.* 1992;7(5):535-7.
281. Moran WP, Nelson K, Wofford JL, Velez R, Case LD. Increasing influenza immunization among high-risk patients: Education or financial incentive? *Am J Med.* 1996 DEC;101(6):612-20.
282. Morrissey JP, Harris RP, Kincade-Norburn J, McLaughlin C, Garrett JM, Jackman AM, et al. Medicare reimbursement for preventive care. changes in performance of services, quality of life, and health care costs. *Med Care.* 1995 Apr;33(4):315-31.
283. Mullooly JP. Increasing influenza vaccination among high-risk elderly: A randomized controlled trial of a mail cue in an HMO setting. *Am J Public Health.* 1987;77(5):626-7.
284. Nexø J, Kragstrup J, Rønne T. Impact of postal invitations and user fee on influenza vaccination rates among the elderly. A randomized controlled trial in general practice. *Scand J Prim Health Care.* 1997 [cited 26 August 2009];15(2):109-12.
285. Nichol KL, Korn JE, Margolis KL, Poland GA, Petzel RA, Lofgren RP. Achieving the national health objective for influenza immunization: Success of an institution-wide vaccination program. *Am J Med.* 1990 Aug;89(2):156-60.

286. Nowalk MP, Lin CJ, Toback SL, Rousculp MD, Eby C, Raymund M, et al. Improving influenza vaccination rates in the workplace: A randomized trial. *Am J Prev Med.* 2010 Mar;38(3):237-46.
287. Nuttall D. The influence of health professionals on the uptake of the influenza immunization. *British Journal of Community Nursing.* 2003;8(9):391-6.
288. Ohmit SE, Furumoto Dawson A, Monto AS. Influenza vaccine use among an elderly population in a community intervention. *American Journal of Preventive Medicine*, vol 11, no 4, 1995 1995.
289. Puech M, Ward J, Lajoie V. Postcard reminders from GPs for influenza vaccine: Are they more effective than an ad hoc approach? *Aust N Z J Public Health.* 1998 APR;22(2):254-6.
290. Quinley JC, Shih A. Improving physician coverage of pneumococcal vaccine: A randomized trial of a telephone intervention. *Journal of Community Health.* 2004;29(2):103-15.
291. Loulergue P, Moulin F, Vidal-Treca G, Absi Z, Demontpion C, Menager C, et al. Knowledge, attitudes and vaccination coverage of healthcare workers regarding occupational vaccinations. *Vaccine.* 2009;27(31):4240-3.
292. Schensul JJ, Radda K, Coman E, Vazquez E. Multi-level intervention to prevent influenza infections in older low income and minority adults. *American Journal of Community Psychology.* 2009;43(3-4):313-29.
293. Shah MN, Clarkson L, Lerner EB, Fairbanks RJ, McCann R, Schneider SM. An emergency medical services program to promote the health of older adults. *J Am Geriatr Soc.* 2006;54(6):956-62.
294. Shenson D, Quinley J, DiMartino D, Stumpf P, Caldwell M, Lee T. Pneumococcal immunizations at flu clinics: The impact of community-wide outreach. *J Community Health.* 2001 JUN;26(3):191-201.
295. Siebers MJ, Hunt VB. Increasing the pneumococcal vaccination rate of elderly patients in a general internal medicine clinic. *J Am Geriatr Soc.* 1985;33(3):175-8.
296. Siriwardena AN, Rashid A, Johnson MRD, Dewey ME. Cluster randomised controlled trial of an educational outreach visit to improve influenza and pneumococcal immunisation rates in primary care. *British Journal of General Practice.* 2002 SEP;52(482):735-40.
297. Smith DM, Zhou X, Weinberger M, Smith F, McDonald RC. Mailed reminders for area-wide influenza immunization: A randomized controlled trial. *J Am Geriatr Soc.* 1999 Jan;47(1):1-5.
298. Solberg LI, Kottke TE, Brekke ML, Magnan S, Davidson G, Calomeni CA, et al. Failure of a continuous quality improvement intervention to increase the delivery of preventive services. A randomized trial.[see comment]. *Effective Clinical Practice.* 2000;3(3):105-15.
299. Spaulding SA, Kugler JP. Influenza immunization: The impact of notifying patients of high-risk status. *J Fam Pract.* 1991;33(5):495-8.
300. Tang PC, Larosa MP, Newcomb C, Gorden SM. Measuring the effects of reminders for outpatient influenza immunizations at the point of clinical opportunity. *Journal of the American Medical Informatics Association.* 1999 [cited 26 August 2009];6(2):115-21.
301. Tape TG, Campbell JR. Computerized medical records and preventive health care: Success depends on many factors. *Am J Med.* 1993;94(6):619-25.
302. Terrell-Perica SMD, Effler PV, Houck PM, Lee L, Crosthwaite GH. The effect of a combined influenza/pneumococcal immunization reminder letter. *Am J Prev Med.* 2001 NOV;21(4):256-60.
303. Thomas DM, Ray SM, Morton FJ, Drew JS, Offutt G, Whitney CG, et al. Patient education strategies to improve pneumococcal vaccination rates: Randomized trial. *Journal of Investigative Medicine.* 2003;51(3):141-8.
304. Tierney WM, Hui SL, McDonald CJ. Delayed feedback of physician performance versus immediate reminders to perform preventive care. effects on physician compliance. *Med Care.* 1986;24(8):659-66.
305. Tierney WM, Overhage JM, Murray MD, Harris LE, Zhou XH, Eckert GJ, et al. Effects of computerized guidelines for managing heart disease in primary care. *J Gen Intern Med.* 2003 Dec;18(12):967-76.
306. Tierney WM, Overhage JM, Murray MD, Harris LE, Zhou XH, Eckert GJ, et al. Can computer-generated evidence-based care suggestions enhance evidence-based management of asthma and chronic obstructive pulmonary disease? A randomized, controlled trial. *Health Serv Res.* 2005 Apr;40(2):477-97.
307. Turner RC, Waivers LE, O'Brien K. The effect of patient-carried reminder cards on the performance of health maintenance measures. *Arch Intern Med.* 1990;150(3):645-7.

308. Turner RC, Peden JG, O'Brien K. Patient-carried card prompts vs computer-generated prompts to remind private practice physicians to perform health maintenance measures. *Arch Intern Med.* 1994;154(17):1957-60.
309. Walter EB, Hellkamp AS, Goldberg KC, Montgomery D, Patterson B, Dolor RJ. Improving influenza vaccine coverage among asthmatics: A practice-based research network study. *JCOM.* 2008 05;15(5):229-34.
310. Warner EA, Seleznick MJ. Using medical record reminders to improve pneumococcal vaccination rates. *Joint Commission Journal on Quality & Safety.* 2004;30(6):331-4.
311. Weaver FM, Goldstein B, Evans CT, Legro MW, LaVela S, Smith B, et al. Influenza vaccination among veterans with spinal cord injury: Part 2. increasing vaccination rates. *J Spinal Cord Med.* 2003 [cited 26 August 2009];26(3):210-8.
312. Wilkinson CR, Williams M. Strengthening patient-provider relationships. *Lippincott's case management : managing the process of patient care.* 2002;7(3):86,99; quiz 100-2.
313. Winston CA, Mims AD, Leatherwood KA. Increasing pneumococcal vaccination in managed care through telephone outreach. *Am J Manag Care.* 2007 [cited 26 August 2009];13(10):581-8.
314. Yanagihara DM, Taira DA, Davis J, Gronley KA, Marciel C, Lee E, et al. A health plan intervention to improve pneumococcal vaccination in the elderly. *MANAGE CARE INTERFACE.* 2005 09;18(9):25-30.
315. Satterthwaite P. A randomised intervention study to examine the effect on immunisation coverage of making influenza vaccine available at no cost. *New Zealand Medical Journal.* 1997;110(1038):58-60.
316. Loeb M. Community-acquired pneumonia. *Clinical Evidence*;2008, 2008.
